# Supplementary material for: Integrated multi-omics analysis of genomics, epigenomics, and transcriptomics in ovarian carcinoma
Source: Aging (Albany NY). 2019 Jun 29;11(12):4198–215. doi: 10.18632/aging.102047 (PMC6629004; doi:10.18632/aging.102047)
Supplement: Supplementary Tables S1-S13 [file aging-11-102047-s002.xlsx]

## Sheet: S1_Table
A0_Samples	A18_Sex	A1_OS	A22_histological_type	A23_Tumor_tissue_site	A2_Event	A6_Stage	A7_Grade	A8_New_Event	A8_New_Event_Time	A8_New_Event_Tissue	A8_New_Event_Type	A9_Cancer_Status	additional_studies	age_at_initial_pathologic_diagnosis	anatomic_neoplasm_subdivision	bcr_patient_barcode	bcr_patient_uuid	day_of_form_completion	days_to_birth	days_to_death	days_to_initial_pathologic_diagnosis	days_to_last_followup	drugs.drug.bcr_drug_barcode	drugs.drug.bcr_drug_uuid	drugs.drug.clinical_trail_drug_classification	drugs.drug.day_of_form_completion	drugs.drug.days_to_drug_therapy_end	drugs.drug.days_to_drug_therapy_start	drugs.drug.drug_name	drugs.drug.measure_of_response	drugs.drug.month_of_form_completion	drugs.drug.number_cycles	drugs.drug.prescribed_dose	drugs.drug.prescribed_dose_units	drugs.drug.regimen_indication	drugs.drug.regimen_indication_notes	drugs.drug.regimen_number	drugs.drug.route_of_administrations.route_of_administration	drugs.drug.therapy_ongoing	drugs.drug.therapy_types.therapy_type	drugs.drug.therapy_types.therapy_type_notes	drugs.drug.total_dose	drugs.drug.total_dose_units	drugs.drug.tx_on_clinical_trial	drugs.drug.year_of_form_completion	eastern_cancer_oncology_group	ethnicity	follow_ups.follow_up.bcr_followup_barcode	follow_ups.follow_up.bcr_followup_uuid
TCGA-61-2611	FEMALE	483	Serous Cystadenocarcinoma	Ovary	Dead	Stage IIIC	G3	1	383		Recurrence	WITH TUMOR		40	Bilateral	TCGA-61-2611	499645bd-e33e-4f89-8526-50460e8bb884	7	-14782	483	0	483	TCGA-61-2611-D28492;TCGA-61-2611-D28493;TCGA-61-2611-D28494	34666b3b-f332-478f-9e6c-b0f883bb1244;7bd1c9d0-0ad8-486c-9554-76f86e0b5519;b44534f8-de06-4bb5-9592-2d22bb4537a9	Not Available;Not Available;Not Available	7;7;7	402;316;316	402;66;66	Doxorubicin HCI Lipsome;Carboplatin;Taxol	Not Available;Not Available;Not Available	9;9;9	1;06;06	10;800;265	mg;mg;mg	RECURRENCE;ADJUVANT;ADJUVANT	Not Applicable;Not Applicable;Not Applicable	Not Available;Not Available;Not Available	IV;IV;IV	NO;NO;NO	Chemotherapy;Chemotherapy;Chemotherapy	Not Available;Not Available;Not Available	Not Available;Not Available;Not Available	mg;mg;mg	Not Available;Not Available;Not Available	2010;2010;2010	Not Available	Not Available	TCGA-61-2611-F28491	10f574ef-ba1d-4b3e-ba11-343fcadafa31
TCGA-23-1114	FEMALE	2089	Serous Cystadenocarcinoma	Ovary	Dead	Stage IIIC	G3	1	634		Recurrence	WITH TUMOR		55	Left	TCGA-23-1114	c0c3caab-9277-4a31-a96c-c607e38d5ccc	2	-20409	2089	0	2089	TCGA-23-1114-D25697;TCGA-23-1114-D25694;TCGA-23-1114-D25693;TCGA-23-1114-D25695;TCGA-23-1114-D25687;TCGA-23-1114-D25691;TCGA-23-1114-D25686;TCGA-23-1114-D25689;TCGA-23-1114-D25696;TCGA-23-1114-D25688;TCGA-23-1114-D25692;TCGA-23-1114-D25690	2875ceab-afed-41fe-bc04-f6b7729cd8c1;a1d5312d-e9dc-4357-a3a8-a122efc3e0a4;380c38b7-6850-4e82-8f9f-71a6f23b2d41;114cca0b-8220-4673-b571-a6a051f4e930;2594811e-287f-418e-bf86-1e968be8111e;2a752af9-ba01-4375-96ee-7f936b87f0be;28862da8-6071-4b65-a284-73b03b98866e;5369784c-c259-4b05-979b-d85b3da36f4d;665be94d-c439-4e5c-9f31-6d83d62a544a;e6c36e8f-5244-49fd-b850-7b811204f0e4;93752a4e-b8b2-48e8-a5d1-51988…	Not Available;Not Available;Not Available;Not Available;Not Available;Not Available;Not Available;Not Available;Not Available;Not Available;Not Available;Not Available	14;14;14;14;14;14;14;14;14;14;14;14	907;2026;1918;747;182;1425;182;1350;747;1222;1425;1350	865;1985;1741;663;43;1357;43;1324;663;1159;1348;1324	Carboplatin;Topotecan;Doxil;Paclitaxel;Paclitaxel;Carboplatin;Carboplatin;Gemzar;Carboplatin;Docetaxel;Gemzar;Cisplatin	Not Available;Not Available;Not Available;Not Available;Not Available;Not Available;Not Available;Not Available;Not Available;Not Available;Not Available;Not Available	12;12;12;12;12;12;12;12;12;12;12;12	03;06;07;05;06;03;06;02;05;04;03;02	Not Available;Not Available;Not Available;Not Available;Not Available;Not Available;Not Available;Not Available;Not Available;Not Available;Not Available;Not Available	mg;mg;mg;mg;mg;mg;mg;mg;mg;mg;mg;mg	OTHER, SPECIFY IN NOTES;PROGRESSION;RECURRENCE;RECURRENCE;ADJUVANT;OTHER, SPECIFY IN NOTES;ADJUVANT;OTHER, SPECIFY IN NOTES;RECURRENCE;RECURRENCE;OTHER, SPECIFY IN NOTES;OTHER, SPECIFY IN NOTES	Consolidation;Not Applicable;Not Applicable;Not Applicable;Not Applicable;Persistent;Not Applicable;Persistent;Not Applicable;Not Applicable;Persistent;Persistent	Not Available;Not Available;Not Available;Not Available;Not Available;Not Available;Not Available;Not Available;Not Available;Not Available;Not Available;Not Available	IV;IV;IV;IV;IV;IV;IV;IV;IV;IV;IV;IV	NO;NO;NO;NO;NO;NO;NO;NO;NO;NO;NO;NO	Chemotherapy;Chemotherapy;Chemotherapy;Chemotherapy;Chemotherapy;Chemotherapy;Chemotherapy;Chemotherapy;Chemotherapy;Chemotherapy;Chemotherapy;Chemotherapy	Not Available;Not Available;Not Available;Not Available;Not Available;Not Available;Not Available;Not Available;Not Available;Not Available;Not Available;Not Available	1305;20.4;475;1400;Not Available;1190;Not Available;5500;2100;520;9625;260	mg;mg;mg;mg;mg;mg;mg;mg;mg;mg;mg;mg	Not Available;Not Available;Not Available;Not Available;Not Available;Not Available;Not Available;Not Available;Not Available;Not Available;Not Available;Not Available	2009;2009;2009;2009;2009;2009;2009;2009;2009;2009;2009;2009	Not Available	NOT HISPANIC OR LATINO	TCGA-23-1114-F25685	02402e47-4ca1-4879-9d04-12415831d9c0
TCGA-31-1951	FEMALE	684	Serous Cystadenocarcinoma	Ovary	Alive	Stage IIIC	G3	1	659		Recurrence	WITH TUMOR		58	Left	TCGA-31-1951	b0839f46-8c82-4619-be3d-c857a1759463	4	-21352	Not Applicable	0	684	TCGA-31-1951-D27694;TCGA-31-1951-D27696;TCGA-31-1951-D27693;TCGA-31-1951-D27695	657dd0b8-f79b-44b4-9847-db5ac8eed2ea;bf9312cc-d8a3-4719-b7bf-b516ea90cadd;c56143b7-c7a5-4bbd-86fc-83ffbd920fc5;5334b5e4-7145-488e-a753-00c01b6c049d	Not Available;Not Available;Not Available;Not Available	4;4;4;4	482;146;482;146	328;41;328;41	Liposomal Doxorubicin;Paclitaxel;Carboplatin;Carboplatin	Not Available;Not Available;Not Available;Not Available	1;1;1;1	06;06;06;06	Not Available;Not Available;Not Available;Not Available	mg;mg;mg;mg	RECURRENCE;ADJUVANT;RECURRENCE;ADJUVANT	Not Applicable;Not Applicable;Not Applicable;Not Applicable	Not Available;Not Available;Not Available;Not Available	IV;IV;IV;IV	NO;NO;NO;NO	Chemotherapy;Chemotherapy;Chemotherapy;Chemotherapy	Not Available;Not Available;Not Available;Not Available	240;1260;3600;3600	mg;mg;mg;mg	Not Available;Not Available;Not Available;Not Available	2010;2010;2010;2010	Not Available	NOT HISPANIC OR LATINO	TCGA-31-1951-F27692	b880add7-cdf8-492c-86f5-a1f8cbcdd513
TCGA-23-1117	FEMALE	1013	Serous Cystadenocarcinoma	Ovary	Dead	Stage IIIC	G3	1	418		Recurrence	WITH TUMOR		42	Left	TCGA-23-1117	a88b7e66-5f12-4023-a7e2-fcfbd1f25977	19	-15690	1013	0	Not Available	TCGA-23-1117-D25703;TCGA-23-1117-D25702;TCGA-23-1117-D25705;TCGA-23-1117-D25701;TCGA-23-1117-D25704;TCGA-23-1117-D25700;TCGA-23-1117-D25706	647f8f33-378a-47c3-8cda-37dbc04a7c54;bffb1d3e-6bc8-472c-b3b6-2b072e107ea2;53b2ce95-0ac5-4e1b-af64-9a769cdc3df6;df44bbcd-995d-4b79-9bee-e364bb571dcd;d5b2da86-8889-4e99-b890-64d403e5e8d3;ae227383-099e-44a2-8398-ba4aa5c804eb;044d289f-4ad5-4e9f-9e5a-373407bd5892	Not Available;Not Available;Not Available;Not Available;Not Available;Not Available;Not Available	27;27;27;27;27;27;11	863;757;993;624;928;294;928	781;712;951;459;890;22;890	Cisplatin;Cyclophosphamide;Gemcitabine;Topotecan;Docetaxel;Carboplatin;Herceptin	Not Available;Not Available;Not Available;Not Available;Not Available;Not Available;Not Available	3;3;3;3;3;3;1	5;3;4;8;5;11;05	Not Available;Not Available;Not Available;Not Available;Not Available;Not Available;Not Available	mg;mg;mg;mg;mg;mg;mg	PROGRESSION;PROGRESSION;PROGRESSION;RECURRENCE;PROGRESSION;ADJUVANT;PROGRESSION	Not Applicable;Not Applicable;Not Applicable;Not Applicable;Not Applicable;Not Applicable;Not Applicable	Not Available;Not Available;Not Available;Not Available;Not Available;Not Available;Not Available	IV;IV;IV;IV;IV;IV;IV	NO;NO;NO;NO;NO;NO;NO	Chemotherapy;Chemotherapy;Chemotherapy;Chemotherapy;Chemotherapy;Chemotherapy;Immunotherapy	Not Available;Not Available;Not Available;Not Available;Not Available;Not Available;Not Available	600;3450;3960;92;280;6470;600	mg;mg;mg;mg;mg;mg;mg	Not Available;Not Available;Not Available;Not Available;Not Available;Not Available;Not Available	2009;2009;2009;2009;2009;2009;2010	Not Available	Not Available	TCGA-23-1117-F25699	7a1fbb0f-3052-4169-b736-a2ad807a71ec
TCGA-13-0804	FEMALE	1073	Serous Cystadenocarcinoma	Ovary	Dead	Stage IIIC	G3	1	329		Recurrence	WITH TUMOR		73	Bilateral	TCGA-13-0804	7e34d3c1-1fab-4326-9a69-4260d2bac558	25	-27021	1073	0	1073	TCGA-13-0804-D24634;TCGA-13-0804-D24636;TCGA-13-0804-D24635	9120000f-695e-4598-948b-393f49a35d72;53652d84-be01-4719-b091-1e0c5a336931;9ba0bb7a-0471-4d62-a672-769e560548fd	Not Available;Not Available;Not Available	15;15;15	161;270;161	26;270;26	Carboplatin;90Y-HU3S193;Paclitaxel	Not Available;Not Available;Not Available	4;4;4	6;Not Available;6	Not Available;Not Available;Not Available	Not Available;Not Available;mg/m2	ADJUVANT;ADJUVANT;ADJUVANT	Not Applicable;Not Applicable;Not Applicable	Not Available;Not Available;Not Available	IV;Not Available;IV	NO;NO;NO	Chemotherapy;Targeted Molecular therapy;Chemotherapy	Not Available;Not Available;Not Available	Not Available;Not Available;Not Available	Not Available;Not Available;mg/m2	Not Available;Not Available;Not Available	2009;2009;2009	Not Available	NOT HISPANIC OR LATINO	TCGA-13-0804-F24633	3a4fad46-797d-4276-b625-8cc78d3545f1
TCGA-04-1371	FEMALE	2506	Serous Cystadenocarcinoma	Ovary	Alive	Stage IIIC	G3	0	2506			TUMOR FREE		58	Bilateral	TCGA-04-1371	bff84539-7862-45b2-b5fc-e77291fcca8b	26	-21243	Not Applicable	0	2506	TCGA-04-1371-D24069;TCGA-04-1371-D24068;TCGA-04-1371-D24067	3ab89f04-e991-431d-a5de-de29b6dc3b31;d7136f6a-05fe-45b2-99b6-45ee4fdc1b75;dc9acb16-b331-4c9a-8486-ceeac1cb85e1	Not Available;Not Available;Not Available	9;9;9	199;199;199	7;7;7	Taxol;Gemcitibine;Carboplatin	Not Available;Not Available;Not Available	11;11;11	08;08;08	Not Available;Not Available;Not Available	mg;mg;mg	ADJUVANT;ADJUVANT;ADJUVANT	Not Applicable;Not Applicable;Not Applicable	Not Available;Not Available;Not Available	IV;IV;IV	NO;NO;NO	Chemotherapy;Chemotherapy;Chemotherapy	Not Available;Not Available;Not Available	1160;13200;5120	mg;mg;mg	Not Available;Not Available;Not Available	2009;2009;2009	0	Not Available	TCGA-04-1371-F24066	5ec41cd6-f520-4e24-99eb-0885ce8ff21b
TCGA-23-1124	FEMALE	1768	Serous Cystadenocarcinoma	Ovary	Dead	Stage IIIC	G3	1	641		Recurrence	WITH TUMOR		62	Left	TCGA-23-1124	8a6d2ce3-cc57-451b-9b07-8263782aa23f	19	-23005	1768	0	Not Available	TCGA-23-1124-D25741;TCGA-23-1124-D25744;TCGA-23-1124-D25742;TCGA-23-1124-D25745;TCGA-23-1124-D25740;TCGA-23-1124-D25743	df58a615-2cd0-4768-855e-d920caff4cbe;ac2cb5f8-306a-4e7e-b2cf-e9e8e84ea8fd;d72e12a2-1524-4f1e-ab4e-108fffef106a;d94c08b1-d8f5-480f-bae4-b7239957cdf4;4285dc70-1dda-45e9-b520-d7704bfb61ba;4575fc46-e77a-4c7e-b1bc-351538c08b00	Not Available;Not Available;Not Available;Not Available;Not Available;Not Available	27;27;27;27;27;27	872;1510;1286;1566;197;1342	676;1363;1070;1538;19;1307	Gemcitabine;Doxorubicin;Paclitaxel;Topotecan;Carboplatin;Vinorelbine	Not Available;Not Available;Not Available;Not Available;Not Available;Not Available	3;3;3;3;3;3	18;6;11;4;9;6	Not Available;Not Available;Not Available;Not Available;Not Available;Not Available	mg;mg;mg;mg;mg;mg	RECURRENCE;PROGRESSION;RECURRENCE;PROGRESSION;ADJUVANT;RECURRENCE	Not Applicable;Not Applicable;Not Applicable;Not Applicable;Not Applicable;Not Applicable	Not Available;Not Available;Not Available;Not Available;Not Available;Not Available	IV;IV;IV;IV;IV;IV	NO;NO;NO;NO;NO;NO	Chemotherapy;Chemotherapy;Chemotherapy;Chemotherapy;Chemotherapy;Chemotherapy	Not Available;Not Available;Not Available;Not Available;Not Available;Not Available	18000;390;3080;12;4950;180	mg;mg;mg;mg;mg;mg	Not Available;Not Available;Not Available;Not Available;Not Available;Not Available	2009;2009;2009;2009;2009;2009	Not Available	Not Available	TCGA-23-1124-F25739	c90aa1d1-772f-417c-b113-a6161625f250
TCGA-09-1669	FEMALE	928	Serous Cystadenocarcinoma	Ovary	Alive	Stage IIIA	G3	0	928			WITH TUMOR		54	Right	TCGA-09-1669	b1c90c69-6149-4105-8182-ab9212f196be	2	-20052	Not Applicable	0	928	TCGA-09-1669-D24306;TCGA-09-1669-D24307	50dcc375-fa24-4050-ad1e-92cd42c75e97;30c1255f-a36c-4d86-8f8e-a064143d8315	Not Available;Not Available	6;6	132;132	27;27	Taxol;Carboplatin	Not Available;Not Available	8;8	6;6	Not Available;Not Available	mg/m2;Not Available	ADJUVANT;ADJUVANT	Not Applicable;Not Applicable	Not Available;Not Available	IV;IV	NO;NO	Chemotherapy;Chemotherapy	Not Available;Not Available	175;6	mg/m2;Not Available	Not Available;Not Available	2009;2009	Not Available	NOT HISPANIC OR LATINO	TCGA-09-1669-F24305	be4d9604-3e6b-4bf2-bd2a-0be49751832a
TCGA-24-1847	FEMALE	343	Serous Cystadenocarcinoma	Ovary	Alive	Stage IV	G3	0	343			TUMOR FREE		45	Bilateral	TCGA-24-1847	21966708-4e66-4211-add0-f1515b09e362	2	-16529	Not Applicable	0	343	TCGA-24-1847-D26351;TCGA-24-1847-D26353;TCGA-24-1847-D26352	1b6a9f6f-1592-436b-800f-4e4d1a19ba98;c4a831bf-4848-4384-ba02-f802c9f681c4;d01c128c-796e-4aa3-9939-631fc9179bbc	Not Available;Not Available;Not Available	24;24;24	143;143;143	28;28;28	Taxotere;Taxol;Ciplastin	Not Available;Not Available;Not Available	7;7;7	6;6;6	Not Available;Not Available;Not Available	mg;mg;mg	ADJUVANT;ADJUVANT;ADJUVANT	Not Applicable;Not Applicable;Not Applicable	Not Available;Not Available;Not Available	IV;IP;IP	NO;NO;NO	Chemotherapy;Chemotherapy;Chemotherapy	Not Available;Not Available;Not Available	733;687;862	mg;mg;mg	Not Available;Not Available;Not Available	2009;2009;2009	Not Available	Not Available	TCGA-24-1847-F26350	a302ccb0-5b86-4a6a-8121-fdf54689c24c
TCGA-24-1852	FEMALE	2201	Serous Cystadenocarcinoma	Ovary	Dead	Stage IIIC	G3	1	1009		Recurrence	WITH TUMOR		55	Bilateral	TCGA-24-1852	d48fff14-9413-40a7-a09c-41f12bbe0aa9	2	-20390	2201	0	2201	TCGA-24-1852-D26370;TCGA-24-1852-D26364;TCGA-24-1852-D26366;TCGA-24-1852-D26368;TCGA-24-1852-D26367;TCGA-24-1852-D26369;TCGA-24-1852-D26365;TCGA-24-1852-D26371	e7eb9218-249e-49ad-b914-a39276408ee6;4fbaa045-8c1a-4562-8a14-027c36c47dc8;41abc427-0a0a-417c-bdac-62964cd28fc6;2daf9300-1112-4263-8c24-998de2e397b3;df90f7fb-b62b-48db-af5d-7c531637e2c2;416cb486-e33c-42e3-a36f-a9a39252ecd5;55c0ae4e-b446-4d4c-b6f0-4e29ecf218c0;f16113a4-2994-442f-a585-2f7a08d53101	Not Available;Not Available;Not Available;Not Available;Not Available;Not Available;Not Available;Not Available	26;26;26;26;26;26;26;26	1709;128;1040;1255;1255;1558;128;1709	Not Available;6;1010;1071;1071;1497;6;Not Available	Doxil;Carboplatin;Topotecan;Taxol;Carboplatin;Taxotere;Taxol;Gemzar	Not Available;Not Available;Not Available;Not Available;Not Available;Not Available;Not Available;Not Available	2;2;2;2;2;2;2;2	06;06;02;09;09;02;06;06	Not Available;Not Available;Not Available;Not Available;Not Available;Not Available;Not Available;Not Available	Not Available;Not Available;Not Available;Not Available;Not Available;Not Available;Not Available;Not Available	RECURRENCE;ADJUVANT;RECURRENCE;PROGRESSION;PROGRESSION;RECURRENCE;ADJUVANT;RECURRENCE	Not Applicable;Not Applicable;Not Applicable;Not Applicable;Not Applicable;Not Applicable;Not Applicable;Not Applicable	Not Available;Not Available;Not Available;Not Available;Not Available;Not Available;Not Available;Not Available	IV;IV;PO;IV;IV;IV;IV;IV	NO;NO;NO;NO;NO;NO;NO;NO	Chemotherapy;Chemotherapy;Chemotherapy;Chemotherapy;Chemotherapy;Chemotherapy;Chemotherapy;Chemotherapy	Not Available;Not Available;Not Available;Not Available;Not Available;Not Available;Not Available;Not Available	Not Available;Not Available;Not Available;Not Available;Not Available;Not Available;Not Available;Not Available	Not Available;Not Available;Not Available;Not Available;Not Available;Not Available;Not Available;Not Available	Not Available;Not Available;Not Available;Not Available;Not Available;Not Available;Not Available;Not Available	2010;2010;2010;2010;2010;2010;2010;2010	Not Available	Not Available	TCGA-24-1852-F26363	86a11d6f-67e3-45ae-a719-41592e845a39
TCGA-61-1741	FEMALE	1024	Serous Cystadenocarcinoma	Ovary	Dead	Stage IIIB	G3	1	488		Recurrence	WITH TUMOR		76	Bilateral	TCGA-61-1741	16ced1b8-64d5-4498-82df-4d37bfe5b310	2	-27762	1024	0	1024	TCGA-61-1741-D28203;TCGA-61-1741-D28206;TCGA-61-1741-D28205;TCGA-61-1741-D28202;TCGA-61-1741-D28204	de49cd91-151a-46e9-a204-106b50968a1f;286c1a59-9223-4a69-b1f8-b72959043137;5aea964c-d67f-417c-94a3-3c4307475905;ce5d7a64-d023-4d01-946f-515257c9017a;846166d2-712d-44eb-9155-a202bd1f1136	Not Available;Not Available;Not Available;Not Available;Not Available	4;4;4;4;4	180;Not Available;605;180;605	12;Not Available;522;12;522	Taxol;Tamoxifen;Carboplatin;Carboplatin;Taxol	Not Available;Not Available;Not Available;Not Available;Not Available	12;12;12;12;12	08;Not Available;03;08;03	Not Available;Not Available;Not Available;Not Available;Not Available	mg;Not Available;mg;mg;mg	ADJUVANT;RECURRENCE;RECURRENCE;ADJUVANT;RECURRENCE	Not Applicable;Not Applicable;Not Applicable;Not Applicable;Not Applicable	Not Available;Not Available;Not Available;Not Available;Not Available	IV;PO;IV;IV;IV	NO;NO;NO;NO;NO	Chemotherapy;Hormone Therapy;Chemotherapy;Chemotherapy;Chemotherapy	Not Available;Not Available;Not Available;Not Available;Not Available	2240;Not Available;1750;3799;838	mg;Not Available;mg;mg;mg	Not Available;Not Available;Not Available;Not Available;Not Available	2009;2009;2009;2009;2009	Not Available	NOT HISPANIC OR LATINO	TCGA-61-1741-F28201	6c399b77-3d5e-4eb6-ae9a-f4857b8b5dab
TCGA-24-1930	FEMALE	2467	Serous Cystadenocarcinoma	Ovary	Dead	Stage IIIC	G3	1	544		Recurrence	WITH TUMOR		53	Bilateral	TCGA-24-1930	62efb5ae-43dc-4a4c-a898-6cd9c6dba027	5	-19387	2467	0	2467	TCGA-24-1930-D26415;TCGA-24-1930-D26414;TCGA-24-1930-D26421;TCGA-24-1930-D26417;TCGA-24-1930-D26419;TCGA-24-1930-D26412;TCGA-24-1930-D26413;TCGA-24-1930-D26418;TCGA-24-1930-D26426;TCGA-24-1930-D26420;TCGA-24-1930-D26423;TCGA-24-1930-D26416;TCGA-24-1930-D26425;TCGA-24-1930-D26411;TCGA-24-1930-D26424;TCGA-24-1930-D26422	a9a826f0-b068-4db5-8615-3b2a585578f0;e547bd75-7dc8-4f1b-842e-a0194ce97a1a;dc04c370-83b2-43a7-9056-046e157157ab;a301ab51-acb4-43f8-aa33-f545f90b0e05;1c7de380-a8bf-42e1-bcc3-74884e150e50;ca6822ec-a578-4121-b321-ab2c95e1258f;42a297e9-ec61-4400-8745-73b1640c5461;9086fde0-9ee3-4bd6-b4a4-5d839da5a442;49444753-00db-4017-92ca-a382d843fd92;02605ba7-d542-46e5-bcfe-98776bd33895;95d84403-e2dd-44a7-8788-27ee1…	Not Available;Not Available;Not Available;Not Available;Not Available;Not Available;Not Available;Not Available;Not Available;Not Available;Not Available;Not Available;Not Available;Not Available;Not Available;Not Available	5;5;5;5;5;5;5;5;5;5;5;5;5;5;5;5	631;274;1475;1112;1275;274;274;1112;2325;1389;2144;1083;2325;274;2144;1684	547;14;1422;1112;1135;14;14;1112;2164;1331;2052;726;2164;14;2052;1492	Ovarex/placebo;Amitostin;Gemcitabine;Carboplatin;Carboplatin;Carboplatin;Cisplatin;Taxol;Cisplatin;Doxil;Topotecan;Topotecan;Gemzar;Taxol;Navelbine;Hexamethymelamine	Not Available;Not Available;Not Available;Not Available;Not Available;Not Available;Not Available;Not Available;Not Available;Not Available;Not Available;Not Available;Not Available;Not Available;Not Available;Not Available	4;4;4;4;4;4;4;4;4;4;4;4;4;4;4;4	05;13;03;01;07;13;13;01;08;03;05;12;08;13;05;07	Not Available;Not Available;Not Available;Not Available;Not Available;Not Available;Not Available;Not Available;Not Available;Not Available;Not Available;Not Available;Not Available;Not Available;Not Available;Not Available	Not Available;mg;mg;mg;mg;mg;mg;mg;mg;mg;mg;mg;mg;mg;mg;Not Available	RECURRENCE;ADJUVANT;PROGRESSION;PROGRESSION;PROGRESSION;ADJUVANT;ADJUVANT;PROGRESSION;PROGRESSION;PROGRESSION;PROGRESSION;PROGRESSION;PROGRESSION;ADJUVANT;PROGRESSION;PROGRESSION	Not Applicable;Not Applicable;Not Applicable;Not Applicable;Not Applicable;Not Applicable;Not Applicable;Not Applicable;Not Applicable;Not Applicable;Not Applicable;Not Applicable;Not Applicable;Not Applicable;Not Applicable;Not Applicable	Not Available;Not Available;Not Available;Not Available;Not Available;Not Available;Not Available;Not Available;Not Available;Not Available;Not Available;Not Available;Not Available;Not Available;Not Available;Not Available	IV;IV;IV;IV;IV;IV;IV;IV;IV;IV;IV;IV;IV;IV;IV;PO	NO;NO;NO;NO;NO;NO;NO;NO;NO;NO;NO;NO;NO;NO;NO;NO	Chemotherapy;Chemotherapy;Chemotherapy;Chemotherapy;Chemotherapy;Chemotherapy;Chemotherapy;Chemotherapy;Chemotherapy;Chemotherapy;Chemotherapy;Chemotherapy;Chemotherapy;Chemotherapy;Chemotherapy;Chemotherapy	Not Available;Not Available;Not Available;Not Available;Not Available;Not Available;Not Available;Not Available;Not Available;Not Available;Not Available;Not Available;Not Available;Not Available;Not Available;Not Available	5;1960;11435;450;3170;4020;518;305;896;218;44.8;95.4;23008;2286;448;49	Not Available;mg;mg;mg;mg;mg;mg;mg;mg;mg;mg;mg;mg;mg;mg;Not Available	Not Available;Not Available;Not Available;Not Available;Not Available;Not Available;Not Available;Not Available;Not Available;Not Available;Not Available;Not Available;Not Available;Not Available;Not Available;Not Available	2010;2010;2010;2010;2010;2010;2010;2010;2010;2010;2010;2010;2010;2010;2010;2010	0	Not Available	TCGA-24-1930-F26410	4e109663-798b-40df-a011-0527bb6151ff
TCGA-23-1032	FEMALE	84	Serous Cystadenocarcinoma	Ovary	Dead	Stage IV	G3	0	84			WITH TUMOR		73	Right	TCGA-23-1032	d1976840-35f7-4423-8458-12fb32a52b33	23	-26715	84	0	68																								Not Available	NOT HISPANIC OR LATINO	TCGA-23-1032-F25659	22b559e9-5e92-444d-93ca-0d357461bd74
TCGA-29-1766	FEMALE	1199	Serous Cystadenocarcinoma	Peritoneum ovary	Dead	Stage IIIC	G2	1	672		Recurrence	WITH TUMOR		74	Right	TCGA-29-1766	01ea6354-137b-47f3-9021-a01a382b1147	2	-27359	1199	0	1190	TCGA-29-1766-D27351;TCGA-29-1766-D27352;TCGA-29-1766-D27356;TCGA-29-1766-D27354;TCGA-29-1766-D27355;TCGA-29-1766-D27353	ef80a8af-4328-4fe3-8e92-d75f92c1b8f2;85e08cba-87ad-4cd9-a99a-e7e8ebce3b30;af7205f0-a192-41e7-b706-5f49b22dc251;0abcc6b0-9996-4a86-8660-099bc0af0f02;bbd623cf-b7e5-418b-92c9-bf283a3e5baa;28d919af-cf13-4344-82b0-4b3bf6086ddb	Not Available;Not Available;Not Available;Not Available;Not Available;Not Available	10;10;26;26;26;26	196;189;1112;727;909;406	39;98;1084;685;825;224	Gemcitabine;Carboplatin;Topotecan;Carboplatin;Doxil;Paclitaxel	Not Available;Not Available;Not Available;Not Available;Not Available;Not Available	12;12;4;4;4;4	11;04;04;03;04;09	Not Available;Not Available;Not Available;Not Available;Not Available;Not Available	mg;mg;mg;AUC;mg;mg	ADJUVANT;ADJUVANT;PROGRESSION;PROGRESSION;PROGRESSION;PROGRESSION	Not Applicable;Not Applicable;Not Applicable;Not Applicable;Not Applicable;Not Applicable	Not Available;Not Available;Not Available;Not Available;Not Available;Not Available	IV;IV;IV;IV;IV;IV	NO;NO;NO;NO;NO;NO	Chemotherapy;Chemotherapy;Chemotherapy;Chemotherapy;Chemotherapy;Chemotherapy	Not Available;Not Available;Not Available;Not Available;Not Available;Not Available	19590;1580;5.4;6;75;320	mg;mg;mg;AUC;mg;mg	Not Available;Not Available;Not Available;Not Available;Not Available;Not Available	2009;2009;2010;2010;2010;2010	0	Not Available	TCGA-29-1766-F27350	043a6f1d-d0c2-411a-937d-9e5c790ed4ad
TCGA-25-1630	FEMALE	1162	Serous Cystadenocarcinoma	Ovary	Dead	Stage IIIC	G3	0	1162			Not Available		73	Bilateral	TCGA-25-1630	263e85e2-7b6f-453f-8fd0-e5ea1409fece	2	-27006	1162	0	239	TCGA-25-1630-D26731;TCGA-25-1630-D26730	9c32d4f7-8cc1-4b59-b283-5ddc42545296;94a3ddc3-9d4a-47a5-a36a-de3736298c44	Not Available;Not Available	17;17	Not Available;Not Available	33;33	Taxol;Carboplatin	Not Available;Not Available	6;6	06;06	Not Available;Not Available	Not Available;Not Available	ADJUVANT;ADJUVANT	Not Applicable;Not Applicable	Not Available;Not Available	IV;IV	NO;NO	Chemotherapy;Chemotherapy	Not Available;Not Available	Not Available;Not Available	Not Available;Not Available	Not Available;Not Available	2009;2009	Not Available	NOT HISPANIC OR LATINO	TCGA-25-1630-F26729	be6e817c-e570-43da-88b6-2a0d1b07d6b6
TCGA-61-2000	FEMALE	441	Serous Cystadenocarcinoma	Ovary	Alive	Stage IIIC	G3	1	339		Recurrence	WITH TUMOR		67	Bilateral	TCGA-61-2000	29949b65-2913-4c86-bbd7-b85c5df6f15e	8	-24723	Not Applicable	0	441	TCGA-61-2000-D28319;TCGA-61-2000-D28315;TCGA-61-2000-D28314;TCGA-61-2000-D28317;TCGA-61-2000-D28313;TCGA-61-2000-D28316;TCGA-61-2000-D28312;TCGA-61-2000-D28318	c8caf399-a8ff-4dc9-8b74-2708050e41c0;d8595da8-5331-4069-8b2c-8ce6f92b1d33;de3a38db-115b-4578-b4ca-1a70e152bc86;a7437859-e26f-4182-a68e-d71bb725f774;f41bfb1f-715c-488a-8c23-0547b7a39613;f43225b8-2247-4397-90fb-8ac91e6a7806;01c66404-139e-49b4-880f-f7fc97c53c34;b473a7f5-5323-4b38-b6ec-4f105fe01e5c	Not Available;Not Available;Not Available;Not Available;Not Available;Not Available;Not Available;Not Available	8;8;8;8;8;8;8;8	588;231;231;491;231;491;231;588	525;28;28;420;28;420;28;525	Taxol;Taxol;CCDP;Oxaliplatin;Taxol;Docetaxel;Carboplatin;Avastin	Not Available;Not Available;Not Available;Not Available;Not Available;Not Available;Not Available;Not Available	12;12;12;12;12;12;12;12	09;06;06;04;09;04;3;04	Not Available;Not Available;Not Available;Not Available;Not Available;Not Available;Not Available;Not Available	mg;mg;mg;mg;mg;mg;mg;mg	RECURRENCE;ADJUVANT;ADJUVANT;RECURRENCE;ADJUVANT;RECURRENCE;ADJUVANT;RECURRENCE	Not Applicable;Not Applicable;Not Applicable;Not Applicable;Not Applicable;Not Applicable;Not Applicable;Not Applicable	Not Available;Not Available;Not Available;Not Available;Not Available;Not Available;Not Available;Not Available	IV;IP;IV;IP;IV;IP;IV;IP;IV;IP;IV;IP;IV;IV	NO;NO;NO;NO;NO;NO;NO;NO	Chemotherapy;Chemotherapy;Chemotherapy;Chemotherapy;Chemotherapy;Chemotherapy;Chemotherapy;Chemotherapy	Not Available;Not Available;Not Available;Not Available;Not Available;Not Available;Not Available;Not Available	855;390;720;367;2130;508;1905;3780	mg;mg;mg;mg;mg;mg;mg;mg	Not Available;Not Available;Not Available;Not Available;Not Available;Not Available;Not Available;Not Available	2009;2009;2009;2009;2009;2009;2009;2009	Not Available	NOT HISPANIC OR LATINO	TCGA-61-2000-F28311	e1ec40cf-3f01-42e9-859f-d16e3aaff23e
TCGA-23-1110	FEMALE	1658	Serous Cystadenocarcinoma	Ovary	Alive	Stage IIIC	G3	1	326		Recurrence	TUMOR FREE		42	Right	TCGA-23-1110	9fb1ba57-2007-4477-b000-2d36f163efd2	23	-15383	Not Applicable	0	1658	TCGA-23-1110-D25667;TCGA-23-1110-D25668;TCGA-23-1110-D25670;TCGA-23-1110-D25669	05f0a85e-8428-42e9-b8c6-79bf2d0eceed;b7078743-ae46-40f4-87e4-3e5d1e8873c7;b9882c4e-8bcd-42a7-baa4-a91102a3853a;58fe9851-57be-4df2-bd75-5e5dcbc2a094	Not Available;Not Available;Not Available;Not Available	14;14;14;14	375;110;235;110	333;6;179;6	Xeloda;Carboplatin;Ovarex/IND;Paclitaxel	Not Available;Not Available;Not Available;Not Available	12;12;12;12	04;06;03;06	Not Available;Not Available;Not Available;Not Available	mg;mg;mg;mg	RECURRENCE;ADJUVANT;OTHER, SPECIFY IN NOTES;ADJUVANT	Not Applicable;Not Applicable;Consolidation;Not Applicable	Not Available;Not Available;Not Available;Not Available	PO;IV;IV;IV	NO;NO;NO;NO	Chemotherapy;Chemotherapy;Immunotherapy;Chemotherapy	Not Available;Not Available;Not Available;Not Available	16800;1800;6;3960	mg;mg;mg;mg	Not Available;Not Available;Not Available;Not Available	2009;2009;2009;2009	Not Available	HISPANIC OR LATINO	TCGA-23-1110-F25666	412125d8-6e4b-4ece-9596-a1bb77f81e61
TCGA-13-0883	FEMALE	2097	Serous Cystadenocarcinoma	Ovary	Dead	Stage IIIC	G3	1	819		Recurrence	WITH TUMOR		61	Bilateral	TCGA-13-0883	5c159ab5-8475-4d93-89b8-b6befed4a5b3	25	-22395	2097	0	2097	TCGA-13-0883-D24647;TCGA-13-0883-D24649;TCGA-13-0883-D24648	d214b9d5-80dd-4328-91a0-0c5f62e7c3c2;10e5d0de-68b8-4480-bc66-6fb0d0544380;0f78c3d5-a61e-42c2-9a2a-3d649afbcfc4	Not Available;Not Available;Not Available	15;15;15	143;350;143	31;227;31	Carbobplatin;Cisplatin;Paclitaxel	Not Available;Not Available;Not Available	4;4;4	6;6;6	Not Available;Not Available;Not Available	Not Available;mg/m2;mg/m2	ADJUVANT;ADJUVANT;ADJUVANT	Not Applicable;Not Applicable;Not Applicable	Not Available;Not Available;Not Available	IV;IP;IV	NO;NO;NO	Chemotherapy;Chemotherapy;Chemotherapy	Not Available;Not Available;Not Available	6;75;175	Not Available;mg/m2;mg/m2	Not Available;Not Available;Not Available	2009;2009;2009	Not Available	NOT HISPANIC OR LATINO	TCGA-13-0883-F24646	0ad0a258-a395-4214-915d-499fb9671a1e
TCGA-13-0794	FEMALE	1919	Serous Cystadenocarcinoma	Ovary	Dead	Stage IIIC	G3	1	845		Recurrence	WITH TUMOR		60	Bilateral	TCGA-13-0794	b63cad1b-b4c7-4e50-8acb-5cee4e9ce4a9	24	-21945	Not Applicable	0	923	TCGA-13-0794-D24600;TCGA-13-0794-D24599	3ae6ca7f-d54e-40bb-9545-a9cbe96a034e;281b15dd-f21d-45da-8ba4-98a7232df8d8	Not Available;Not Available	17;17	132;132	26;26	Docetaxel;Carboplatin	Not Available;Not Available	4;4	6;6	Not Available;Not Available	mg/m2;Not Available	ADJUVANT;ADJUVANT	Not Applicable;Not Applicable	Not Available;Not Available	IP;IV;IP	NO;NO	Chemotherapy;Chemotherapy	Not Available;Not Available	60;Not Available	mg/m2;Not Available	Not Available;Not Available	2009;2009	Not Available	NOT HISPANIC OR LATINO	TCGA-13-0794-F24598;TCGA-13-0794-F72607	9805702d-3f0c-44bf-a09e-b342a981b370;1457CC0F-AF2C-48D8-B685-D15A10C32009
TCGA-24-2023	FEMALE	1364	Serous Cystadenocarcinoma	Ovary	Dead	Stage IIIA	G3	1	1069		Recurrence	WITH TUMOR		54	Bilateral	TCGA-24-2023	5201ee13-2aed-4641-9169-4d5ee07a23da	16	-19901	1364	0	1364	TCGA-24-2023-D26444;TCGA-24-2023-D26446;TCGA-24-2023-D26447;TCGA-24-2023-D26445;TCGA-24-2023-D26443;TCGA-24-2023-D26448	723fff60-9a4d-4926-9ddc-5c109565804f;16528892-89f9-4770-a7b5-a9fa9bde5046;b78b10cb-7049-4c3c-b560-95defbc79e0a;e8d6fbd5-5369-4e58-8efe-8b2f82ce54d6;e6e1767b-c704-4c4c-a6fa-108c9024c4a7;6037de33-2474-48a3-bb85-c4f84c3f0f75	Not Available;Not Available;Not Available;Not Available;Not Available;Not Available	16;16;16;16;16;16	214;502;1245;502;214;1245	6;273;1126;273;6;1126	Taxol;Cytoxan;Taxol;Cisplatin;Carboplatin;Carboplatin	Not Available;Not Available;Not Available;Not Available;Not Available;Not Available	3;3;3;3;3;3	08;08;06;08;08;06	Not Available;Not Available;Not Available;Not Available;Not Available;Not Available	mg;mg;mg;mg;mg;mg	ADJUVANT;ADJUVANT;RECURRENCE;ADJUVANT;ADJUVANT;RECURRENCE	Not Applicable;Not Applicable;Not Applicable;Not Applicable;Not Applicable;Not Applicable	Not Available;Not Available;Not Available;Not Available;Not Available;Not Available	IV;IV;IV;IV;IV;IV	NO;NO;NO;NO;NO;NO	Chemotherapy;Chemotherapy;Chemotherapy;Chemotherapy;Chemotherapy;Chemotherapy	Not Available;Not Available;Not Available;Not Available;Not Available;Not Available	2151;3000;2100;450;5775;2740	mg;mg;mg;mg;mg;mg	Not Available;Not Available;Not Available;Not Available;Not Available;Not Available	2010;2010;2010;2010;2010;2010	Not Available	Not Available	TCGA-24-2023-F26442	478e3654-2c9e-4ee7-b80d-d63e0a5c5ebe
TCGA-24-1474	FEMALE	676	Serous Cystadenocarcinoma	Ovary	Dead	Stage IIIC	G3	1	332		Recurrence	WITH TUMOR		57	Left	TCGA-24-1474	d7b3156d-672a-4a55-868d-9ca6a09fcb0f	13	-20902	676	0	676	TCGA-24-1474-D26077;TCGA-24-1474-D26075;TCGA-24-1474-D26076;TCGA-24-1474-D26074;TCGA-24-1474-D26078	2a00f718-f1e2-4eff-bc7f-5b77b5f35bc2;bfeee902-a018-4e6e-bb1d-38e6dfa8586a;eecac960-1b19-4854-beb4-ab67384cee3a;df02a6f7-9b82-42f2-acf8-938d8e6af6f3;a604ab2b-1244-4582-aeb7-42765d3a9923	Not Available;Not Available;Not Available;Not Available;Not Available	13;13;13;13;13	635;123;431;123;635	454;18;350;18;454	Gemzar;Taxol;Topotecan;Carboplatin;Doxil	Not Available;Not Available;Not Available;Not Available;Not Available	5;5;5;5;5	07;06;05;06;07	Not Available;Not Available;Not Available;Not Available;Not Available	mg;mg;mg;mg;mg	PROGRESSION;ADJUVANT;RECURRENCE;ADJUVANT;PROGRESSION	Not Applicable;Not Applicable;Not Applicable;Not Applicable;Not Applicable	Not Available;Not Available;Not Available;Not Available;Not Available	IV;IV;IV;IV;IV	NO;NO;NO;NO;NO	Chemotherapy;Chemotherapy;Chemotherapy;Chemotherapy;Chemotherapy	Not Available;Not Available;Not Available;Not Available;Not Available	2365;1962;57;4050;302	mg;mg;mg;mg;mg	Not Available;Not Available;Not Available;Not Available;Not Available	2009;2009;2009;2009;2009	Not Available	Not Available	TCGA-24-1474-F26073	76d29b08-30df-4efc-8cba-1bd4d4935300
TCGA-59-2351	FEMALE	3532	Serous Cystadenocarcinoma	Ovary	Alive	Stage IIIC	G3	1	2139		Progression of Disease	TUMOR FREE		51	Bilateral	TCGA-59-2351	16829472-5666-4fba-9bf9-360ec1689aa0	29	Not Available	Not Applicable	0	3532																								Not Available	NOT HISPANIC OR LATINO	TCGA-59-2351-F28104	714f1bfd-54f3-4a05-bbc7-3bc9bc5ace8e
TCGA-23-1021	FEMALE	1446	Serous Cystadenocarcinoma	Ovary	Dead	Stage IV	G3	1			Locoregional Disease	WITH TUMOR		45	Right	TCGA-23-1021	b923ac70-70ea-4a82-8466-46350c5803bf	24	-16484	1446	0	1446	TCGA-23-1021-D25570;TCGA-23-1021-D25569;TCGA-23-1021-D25571;TCGA-23-1021-D25568;TCGA-23-1021-D25573;TCGA-23-1021-D25574;TCGA-23-1021-D25572	f3d78a9b-08ea-4aa8-9cb5-677b67207783;ba314cd4-e2a6-4f5a-9104-137cd1e29ba7;9ade7aa5-18d8-4919-ae99-2a73732ba30e;ade37eb4-02de-42c7-8d26-fad6a3398a00;3fd43153-5bdf-45ff-8eef-1bdc764b40ba;9c425509-cbf7-43a5-8830-f4f4f75459f7;c20a16f7-cfb8-421e-8951-fbc938aaa1b2	Not Available;Not Available;Not Available;Not Available;Not Available;Not Available;Not Available	1;1;1;1;1;1;1	693;119;861;119;1380;1408;1331	526;14;722;14;1352;1408;1226	Gemcitabine;Paclitaxel;Topotecan;Carboplatin;Vinorelbine;Doxorubicin;Paclitaxel	Not Available;Not Available;Not Available;Not Available;Not Available;Not Available;Not Available	4;4;4;4;4;4;4	5;6;6;6;2;1;5	Not Available;Not Available;Not Available;Not Available;Not Available;Not Available;Not Available	mg;mg;mg;mg;mg;mg;mg	OTHER, SPECIFY IN NOTES;ADJUVANT;PROGRESSION;ADJUVANT;PROGRESSION;PROGRESSION;PROGRESSION	Persistence;Not Applicable;Not Applicable;Not Applicable;Not Applicable;Not Applicable;Not Applicable	Not Available;Not Available;Not Available;Not Available;Not Available;Not Available;Not Available	IV;IV;IV;IV;IV;IV;IV	NO;NO;NO;NO;NO;NO;NO	Chemotherapy;Chemotherapy;Chemotherapy;Chemotherapy;Chemotherapy;Chemotherapy;Chemotherapy	Not Available;Not Available;Not Available;Not Available;Not Available;Not Available;Not Available	6061;2100;60;2880;50;25;2540	mg;mg;mg;mg;mg;mg;mg	Not Available;Not Available;Not Available;Not Available;Not Available;Not Available;Not Available	2009;2009;2009;2009;2009;2009;2009	Not Available	NOT HISPANIC OR LATINO	TCGA-23-1021-F25567	deff0c2e-9b3e-4181-97d6-13ddfc9f115a
TCGA-25-1317	FEMALE	61	Serous Cystadenocarcinoma	Ovary	Dead	Stage IIIC	G3	0	61			Not Available		66	Bilateral	TCGA-25-1317	78777a80-cc6c-46c9-a14a-837ac7943719	27	-24199	61	0	Not Available	TCGA-25-1317-D26653;TCGA-25-1317-D26652	0b21e1d6-b7d7-4509-84fd-30a3a6f2ba0c;4415066a-d41d-4847-b874-98a231029cf3	Not Available;Not Available	27;27	31;31	0;0	Carboplatin;Taxol	Not Available;Not Available	3;3	1;1	Not Available;Not Available	Not Available;Not Available	ADJUVANT;ADJUVANT	Not Applicable;Not Applicable	Not Available;Not Available	IV;IV	NO;NO	Chemotherapy;Chemotherapy	Not Available;Not Available	Not Available;Not Available	Not Available;Not Available	Not Available;Not Available	2009;2009	Not Available	NOT HISPANIC OR LATINO	TCGA-25-1317-F26651	72ae7e80-c25a-4051-86da-8d77657354e5
TCGA-24-1464	FEMALE	379	Serous Cystadenocarcinoma	Ovary	Dead	Stage IIIC	G3	1	323		Recurrence	WITH TUMOR		70	Left	TCGA-24-1464	4160e048-f0b0-40f5-805b-e277a5893a3b	23	-25874	379	0	379	TCGA-24-1464-D26023;TCGA-24-1464-D26024;TCGA-24-1464-D26025	00cf7ce9-c07f-4dad-9bb6-c753b989cc0a;b1703138-84c6-4bae-8a50-718ca2ebde6f;5610bcd5-4bfb-40ee-bdd7-15c71555094a	Not Available;Not Available;Not Available	24;12;12	163;163;343	28;28;342	Taxol;Carboplatin;Toptecan	Not Available;Not Available;Not Available	4;5;5	07;07;01	Not Available;Not Available;Not Available	mg;mg;mg	ADJUVANT;ADJUVANT;RECURRENCE	Not Applicable;Not Applicable;Not Applicable	Not Available;Not Available;Not Available	IV;IV;IV	NO;NO;NO	Chemotherapy;Chemotherapy;Chemotherapy	Not Available;Not Available;Not Available	1937;5555;8.44	mg;mg;mg	Not Available;Not Available;Not Available	2009;2009;2009	1	Not Available	TCGA-24-1464-F26022	77ea97ca-736c-4ab4-9670-0941b73c1bb3
TCGA-24-0982	FEMALE	679	Serous Cystadenocarcinoma	Ovary	Dead	Stage IIIC	G3	1	153		Recurrence	WITH TUMOR		77	Bilateral	TCGA-24-0982	206ce0ed-36a4-47ab-ac8e-f6fca6ac5c18	10	-28201	679	0	679	TCGA-24-0982-D25905;TCGA-24-0982-D25902;TCGA-24-0982-D25901;TCGA-24-0982-D25906;TCGA-24-0982-D25904;TCGA-24-0982-D25903;TCGA-24-0982-D25907;TCGA-24-0982-D25908	912d8e00-f08e-482d-bb62-634b415019cc;86c8e150-07cf-4e9e-83d9-e57f33818e05;09307e85-1a95-410e-96db-c9761556f6fb;52092e56-744b-43f4-8bda-609e63790207;8070fa1e-6749-46b8-af00-245149e18154;ef503cec-e161-41bd-85a3-8bb01f6b1328;ce37916d-d891-424a-bc45-12e3cb0755f6;8e3d7162-d3b2-4f32-b3a8-948be3ee41ab	Not Available;Not Available;Not Available;Not Available;Not Available;Not Available;Not Available;Not Available	10;10;10;10;10;10;29;29	474;125;125;474;321;321;615;615	341;13;13;341;251;251;488;488	Gemzar;Paclitaxel;Carboplatin;Doxil;Navelbine;Topotecan;Taxol;Carboplatin	Not Available;Not Available;Not Available;Not Available;Not Available;Not Available;Not Available;Not Available	3;3;3;3;3;3;1;1	5;6;06;5;4;04;7;7	Not Available;Not Available;Not Available;Not Available;Not Available;Not Available;Not Available;Not Available	mg;mg;mg;mg;mg;mg;mg;mg	PROGRESSION;ADJUVANT;ADJUVANT;PROGRESSION;RECURRENCE;RECURRENCE;PROGRESSION;PROGRESSION	Not Applicable;Not Applicable;Not Applicable;Not Applicable;Not Applicable;Not Applicable;Not Applicable;Not Applicable	Not Available;Not Available;Not Available;Not Available;Not Available;Not Available;Not Available;Not Available	IV;IV;IV;IV;IV;IV;IV;IV	NO;NO;NO;NO;NO;NO;NO;NO	Chemotherapy;Chemotherapy;Chemotherapy;Chemotherapy;Chemotherapy;Chemotherapy;Chemotherapy;Chemotherapy	Not Available;Not Available;Not Available;Not Available;Not Available;Not Available;Not Available;Not Available	24798;1966;4090;388;390;39;2276;3800	mg;mg;mg;mg;mg;mg;mg;mg	Not Available;Not Available;Not Available;Not Available;Not Available;Not Available;Not Available;Not Available	2009;2009;2009;2009;2009;2009;2010;2010	Not Available	Not Available	TCGA-24-0982-F25900	ac8e6667-9f37-442b-9a6e-6497824d60a9
TCGA-36-1578	FEMALE	847	Serous Cystadenocarcinoma	Ovary	Alive	Stage IV	G3	1	310		Recurrence	WITH TUMOR		63	Not Available	TCGA-36-1578	f65f2e78-c001-4ef3-ae88-3e4f83c7aceb	2	-23329	Not Applicable	0	847	TCGA-36-1578-D27887;TCGA-36-1578-D27885;TCGA-36-1578-D27886	67ff741a-20f6-473c-93bf-60dc4e5ef139;72c7d40a-c4da-405a-8c98-02ff8c7b4036;f8bb0861-fe1f-4810-b9ca-bbfb06383418	Not Available;Not Available;Not Available	17;17;17	345;212;212	321;15;15	Liposomal Doxorubicin;Carboplatin;Paclitaxel	Not Available;Not Available;Not Available	2;2;2	02;11;9	Not Available;Not Available;Not Available	mg;mg;mg	PROGRESSION;ADJUVANT;ADJUVANT	Not Applicable;Not Applicable;Not Applicable	Not Available;Not Available;Not Available	IV;IV;IV	NO;NO;NO	Chemotherapy;Chemotherapy;Chemotherapy	Not Available;Not Available;Not Available	136;4830;2013	mg;mg;mg	Not Available;Not Available;Not Available	2010;2010;2010	0	NOT HISPANIC OR LATINO	TCGA-36-1578-F27884	35caaae5-e969-4b89-bba6-dfc7859ae181
TCGA-09-2056	FEMALE	379	Serous Cystadenocarcinoma	Ovary	Alive	Stage IIIC	G3	0	379			TUMOR FREE		62	Bilateral	TCGA-09-2056	ea6405c4-0fe4-4f37-bef2-275072f91e39	2	-22864	Not Applicable	0	379	TCGA-09-2056-D24401;TCGA-09-2056-D24400	83a5aabd-3f44-4398-9fd1-09ffac14acde;4782449f-9b8d-48f6-80e7-d05021eef896	Not Available;Not Available	2;2	147;147	25;25	Taxol;Carboplatin	Not Available;Not Available	11;11	6;6	Not Available;Not Available	Not Available;Not Available	ADJUVANT;ADJUVANT	Not Applicable;Not Applicable	Not Available;Not Available	IV;IV	NO;NO	Chemotherapy;Chemotherapy	Not Available;Not Available	Not Available;Not Available	Not Available;Not Available	Not Available;Not Available	2009;2009	Not Available	HISPANIC OR LATINO	TCGA-09-2056-F24399	d88c100c-2a42-4ea1-8cf3-60def08194e0
TCGA-57-1582	FEMALE	731	Serous Cystadenocarcinoma	Ovary	Dead	Stage IIIC	G3	0	731			WITH TUMOR		50	Left	TCGA-57-1582	4ea50685-3b63-440a-b037-597ef2529e7d	2	Not Available	731	0	731	TCGA-57-1582-D28064;TCGA-57-1582-D28065;TCGA-57-1582-D28066;TCGA-57-1582-D28061;TCGA-57-1582-D28060;TCGA-57-1582-D28063;TCGA-57-1582-D28062	9041086b-05e4-47fa-a97e-8a2434ee502f;52fe6e4b-e0f3-45ac-a637-1646983fa465;64899839-fe30-4966-ad41-a6039e479566;6e3807f9-6043-4aec-aa04-b7e7feab6f77;4476f55a-92b6-41f6-86a8-d943b07880fc;cf142304-ee75-49b0-9661-d6a7f35b0e5f;465a4575-5435-43fd-83d8-e1e1e3f854a2	Not Available;Not Available;Not Available;Not Available;Not Available;Not Available;Not Available	28;28;28;28;28;28;28	597;718;718;170;170;505;Not Available	505;597;597;17;17;444;260	Topotecan;Carboplatin;Gemzar;Taxotere;Carboplatin;Doxil;Patupilone	Not Available;Not Available;Not Available;Not Available;Not Available;Not Available;Not Available	7;7;7;7;7;7;7	Not Available;Not Available;Not Available;06;06;Not Available;Not Available	Not Available;Not Available;Not Available;Not Available;Not Available;Not Available;Not Available	Not Available;Not Available;Not Available;Not Available;Not Available;Not Available;Not Available	PROGRESSION;PROGRESSION;PROGRESSION;ADJUVANT;ADJUVANT;PROGRESSION;PROGRESSION	Not Applicable;Not Applicable;Not Applicable;Not Applicable;Not Applicable;Not Applicable;Not Applicable	Not Available;Not Available;Not Available;Not Available;Not Available;Not Available;Not Available	Not Available;Not Available;Not Available;IV;IV;IV;Not Available	NO;NO;NO;NO;NO;NO;NO	Chemotherapy;Chemotherapy;Chemotherapy;Chemotherapy;Chemotherapy;Chemotherapy;Chemotherapy	Not Available;Not Available;Not Available;Not Available;Not Available;Not Available;Not Available	Not Available;Not Available;Not Available;Not Available;Not Available;Not Available;Not Available	Not Available;Not Available;Not Available;Not Available;Not Available;Not Available;Not Available	Not Available;Not Available;Not Available;Not Available;Not Available;Not Available;Not Available	2009;2009;2009;2009;2009;2009;2009	Not Available	Not Available	TCGA-57-1582-F28059	d6ebac21-c97c-456d-b42e-726017a129d6
TCGA-04-1649	FEMALE	1966	Serous Cystadenocarcinoma	Ovary	Alive	Stage IIIC	G3	1	1672		Recurrence	Not Available		74	Bilateral	TCGA-04-1649	314e446d-3a57-4c91-ac2e-4fc211456ee6	2	-27165	Not Applicable	0	1966	TCGA-04-1649-D24169;TCGA-04-1649-D24170	976c28f1-f941-4649-a5eb-1f8377e55c18;bef99616-fb63-4a21-bb71-09f9e6a33c99	Not Available;Not Available	9;9	Not Available;Not Available	1704;1704	Taxotere;Carboplatin	Not Available;Not Available	11;11	Not Available;Not Available	Not Available;Not Available	Not Available;Not Available	RECURRENCE;RECURRENCE	Not Applicable;Not Applicable	Not Available;Not Available	IV;IV	NO;NO	Chemotherapy;Chemotherapy	Not Available;Not Available	Not Available;Not Available	Not Available;Not Available	Not Available;Not Available	2009;2009	1	Not Available	TCGA-04-1649-F24168	f9735bfe-c3b8-450d-9d52-4b36a3a90e03
TCGA-24-0980	FEMALE	233	Serous Cystadenocarcinoma	Ovary	Dead	Stage IIIC	G3	1	145		Recurrence	WITH TUMOR		53	Bilateral	TCGA-24-0980	d1eeaca3-52c0-4a0c-916a-fd64cec911d9	24	-19579	233	0	233	TCGA-24-0980-D25897;TCGA-24-0980-D25898	15cde1b3-b643-4d88-b4e5-6a05bfb9ab64;2f798bfb-2136-4d59-81f1-297bc7fbf831	Not Available;Not Available	27;27	178;178	77;77	paclitaxel;carboplatin	Not Available;Not Available	3;3	4;4	Not Available;Not Available	mg;mg	ADJUVANT;ADJUVANT	Not Applicable;Not Applicable	Not Available;Not Available	IV;IV	Not Available;Not Available	Chemotherapy;Chemotherapy	Not Available;Not Available	1265.5;2012	mg;mg	Not Available;Not Available	2009;2009	Not Available	NOT HISPANIC OR LATINO	TCGA-24-0980-F25896	01a4cffe-47b2-431f-8a34-e56b0f5fa229
TCGA-24-1924	FEMALE	919	Serous Cystadenocarcinoma	Ovary	Dead	Stage IIIC	G3	1	320		Recurrence	WITH TUMOR		65	Bilateral	TCGA-24-1924	26558703-a659-43f2-86cb-0695989bc14e	26	-23801	919	0	919	TCGA-24-1924-D26390;TCGA-24-1924-D26393;TCGA-24-1924-D26387;TCGA-24-1924-D26392;TCGA-24-1924-D26388;TCGA-24-1924-D26394;TCGA-24-1924-D26389;TCGA-24-1924-D26391	6afe2675-ab28-4150-b5ab-93fa07fdbd99;e36c9e00-fc2f-4c5e-b431-98eba3c2118a;c723aeb5-e5fe-484c-99f6-21e20b245735;ad26b9f3-a159-4558-87f5-8659e0f24ca6;56f40dff-03e0-4832-bcad-78ced0f5ca2a;b0797198-ab1c-487a-8587-9d4b65e76dd1;e22e432e-4877-404e-b67c-452eaeef5a91;5f75fd73-f687-48f7-9cc1-f4a8ec07679b	Not Available;Not Available;Not Available;Not Available;Not Available;Not Available;Not Available;Not Available	26;26;26;26;26;26;26;26	583;681;161;681;161;743;525;583	553;597;21;597;21;706;329;553	Topotecan;Gemzar;Carboplatin;Cisplatin;Taxol;Hexalen;Doxil;Navelbine	Not Available;Not Available;Not Available;Not Available;Not Available;Not Available;Not Available;Not Available	2;2;2;2;2;2;2;2	02;05;06;05;06;02;08;02	Not Available;Not Available;Not Available;Not Available;Not Available;Not Available;Not Available;Not Available	mg;mg;mg;mg;mg;mg;mg;mg	PROGRESSION;PROGRESSION;ADJUVANT;PROGRESSION;ADJUVANT;PROGRESSION;RECURRENCE;PROGRESSION	Not Applicable;Not Applicable;Not Applicable;Not Applicable;Not Applicable;Not Applicable;Not Applicable;Not Applicable	Not Available;Not Available;Not Available;Not Available;Not Available;Not Available;Not Available;Not Available	IV;IV;IV;IV;IV;PO;IV;IV	NO;NO;NO;NO;NO;NO;NO;NO	Chemotherapy;Chemotherapy;Chemotherapy;Chemotherapy;Chemotherapy;Chemotherapy;Chemotherapy;Chemotherapy	Not Available;Not Available;Not Available;Not Available;Not Available;Not Available;Not Available;Not Available	18.4;7914;2595;441;1621;12600;576;184	mg;mg;mg;mg;mg;mg;mg;mg	Not Available;Not Available;Not Available;Not Available;Not Available;Not Available;Not Available;Not Available	2010;2010;2010;2010;2010;2010;2010;2010	Not Available	Not Available	TCGA-24-1924-F26386	21cccc06-a7a4-4bdc-a840-cd5f49ce523a
TCGA-36-2534	FEMALE	907	Serous Cystadenocarcinoma	Ovary	Alive	Stage IIIC	G3	1	383		Progression of Disease	WITH TUMOR		72	Right	TCGA-36-2534	e08a619d-8a55-435d-8c41-a77a112ed889	18	-26621	Not Applicable	0	907	TCGA-36-2534-D27919;TCGA-36-2534-D27920;TCGA-36-2534-D27921	13620b52-e2ce-4432-a515-5fa70c731e9f;6a4a8078-bc7d-4d80-a77b-932a4360fe9a;25f3327a-f99f-435e-b0c9-374a05c7adac	Not Available;Not Available;Not Available	18;18;18	154;154;685	27;27;544	Carboplatin;Docetaxel;Carboplatin	Not Available;Not Available;Not Available	8;8;8	07;07;06	470;135;600	mg;mg;mg	ADJUVANT;ADJUVANT;PROGRESSION	Not Applicable;Not Applicable;Not Applicable	Not Available;Not Available;Not Available	IV;IV;IV	NO;NO;NO	Chemotherapy;Chemotherapy;Chemotherapy	Not Available;Not Available;Not Available	3735;949;3720	mg;mg;mg	Not Available;Not Available;Not Available	2010;2010;2010	1	Not Available	TCGA-36-2534-F27918	ffa8c288-a2f2-4a74-8e66-b437588e8ba5
TCGA-29-1777	FEMALE	374	Serous Cystadenocarcinoma	Ovary	Alive	Stage IIIC	G2	0	374			WITH TUMOR		47	Bilateral	TCGA-29-1777	5ced5b58-fab4-4bcd-b706-d6e49ce0cfc5	2	-17356	Not Applicable	0	374	TCGA-29-1777-D27418;TCGA-29-1777-D27416;TCGA-29-1777-D27417	c821d43b-cc39-4e8d-baef-20905b8795e5;2d46646d-aff6-454e-b00e-294b99ca71f9;b75caa77-a905-4a32-b84b-da1b1c8917a5	Not Available;Not Available;Not Available	26;26;26	346;303;325	346;87;325	Doxorubicin HCL;Carboplatin;Carboplatin	Not Available;Not Available;Not Available	10;10;10	01;06;01	Not Available;Not Available;Not Available	mg;mg;mg	ADJUVANT;ADJUVANT;ADJUVANT	Not Applicable;Not Applicable;Not Applicable	Not Available;Not Available;Not Available	IV;IV;IV	NO;NO;NO	Chemotherapy;Chemotherapy;Chemotherapy	Not Available;Not Available;Not Available	70;740;660	mg;mg;mg	Not Available;Not Available;Not Available	2009;2009;2009	0	Not Available	TCGA-29-1777-F27415	26534f1e-ae94-44af-8630-10166f59e9a1
TCGA-61-1913	FEMALE	1488	Serous Cystadenocarcinoma	Ovary	Alive	Stage IIIB	G3	0	1488			TUMOR FREE		48	Right	TCGA-61-1913	8516d4f2-0b98-4847-99c6-4d7269fa4af2	1	-17575	Not Applicable	0	1488	TCGA-61-1913-D28270;TCGA-61-1913-D28271	a567da40-6f3c-49d1-b3f8-ce39c43506a2;490e164d-620b-44b0-bb79-d767b6bd4d4c	Not Available;Not Available	4;4	127;127	21;21	Docetaxel;Carboplatin	Not Available;Not Available	12;12	06;06	Not Available;Not Available	mg;mg	ADJUVANT;ADJUVANT	Not Applicable;Not Applicable	Not Available;Not Available	IV;IV	NO;NO	Chemotherapy;Chemotherapy	Not Available;Not Available	720;3930	mg;mg	Not Available;Not Available	2009;2009	Not Available	NOT HISPANIC OR LATINO	TCGA-61-1913-F28269	13bbd5c0-51bc-4d78-800b-adad5eaa8d38
TCGA-13-2060	FEMALE	2369	Serous Cystadenocarcinoma	Ovary	Alive	Stage IV	G3	1	1475			TUMOR FREE		51	Bilateral	TCGA-13-2060	196f4600-b6c9-4652-9f77-65c92883f8c1	16	-18635	Not Applicable	0	262	TCGA-13-2060-D24999;TCGA-13-2060-D25000;TCGA-13-2060-D25001	1f942379-637b-4d34-9ebe-08a3e2d9152a;f813388d-644d-46c4-b29c-f935cfaf6bc4;f6f38882-1d0e-426f-af54-275027957055	Not Available;Not Available;Not Available	16;16;16	143;143;143	31;31;31	Cisplatin;Paclitaxel;Paclitaxel	Not Available;Not Available;Not Available	12;12;12	6;6;6	Not Available;Not Available;Not Available	mg/m2;mg/m2;mg/m2	ADJUVANT;ADJUVANT;ADJUVANT	Not Applicable;Not Applicable;Not Applicable	Not Available;Not Available;Not Available	IP;IV;IP;IV;IP;IV	NO;NO;NO	Chemotherapy;Chemotherapy;Chemotherapy	Not Available;Not Available;Not Available	75;135;600	mg/m2;mg/m2;mg/m2	Not Available;Not Available;Not Available	2009;2009;2009	Not Available	Not Available	TCGA-13-2060-F24998;TCGA-13-2060-F72683	970fa6e8-453c-4cff-b1e0-f5cadfc60973;83381640-F886-4788-A867-7D9435E6FC0E
TCGA-09-0369	FEMALE	1082	Serous Cystadenocarcinoma	Ovary	Dead	Stage IIIC	G3	1	274		Recurrence	WITH TUMOR		56	Left	TCGA-09-0369	1d9893c8-0de3-4b07-b0ba-a53019b23eb4	4	-20705	1082	0	Not Available	TCGA-09-0369-D24222;TCGA-09-0369-D24221;TCGA-09-0369-D24218;TCGA-09-0369-D24219;TCGA-09-0369-D24220;TCGA-09-0369-D24223;TCGA-09-0369-D24224	bbdd7a4d-fef2-4c8c-861b-13a0f7078f3b;8f85510a-6960-4611-95c3-22de367928af;aeffde3e-f5d7-46b9-98da-ec10ec9ca0ef;ac05217b-40a7-4a8c-9ff0-2fb4526a9f18;5e712ef4-3b95-4cfb-913c-1440d7767ee5;7d37f03d-f6d7-4a69-a9da-8e6830441fa9;a3c40628-cd5c-49dd-98f3-eed3e9460b59	Not Available;Not Available;Not Available;Not Available;Not Available;Not Available;Not Available	27;27;27;27;27;27;27	99;99;74;74;78;298;446	99;99;8;8;78;298;310	gemcitabine;Carbo;Carbo;taxol;Taxotere;doxil;topotecan	Not Available;Not Available;Not Available;Not Available;Not Available;Not Available;Not Available	3;3;3;3;3;3;3	1;1;4;4;1;1;Not Available	Not Available;Not Available;Not Available;Not Available;Not Available;Not Available;Not Available	mg/m2;Not Available;Not Available;mg/m2;mg;mg/m2;Not Available	ADJUVANT;ADJUVANT;ADJUVANT;ADJUVANT;ADJUVANT;RECURRENCE;RECURRENCE	Not Applicable;Not Applicable;Not Applicable;Not Applicable;Not Applicable;Not Applicable;Not Applicable	Not Available;Not Available;Not Available;Not Available;Not Available;Not Available;Not Available	IV;IV;IV;IV;IV;IV;IV	NO;NO;NO;NO;NO;NO;NO	Chemotherapy;Chemotherapy;Chemotherapy;Chemotherapy;Chemotherapy;Chemotherapy;Chemotherapy	Not Available;Not Available;Not Available;Not Available;Not Available;Not Available;Not Available	1000;Not Available;Not Available;175;80;40;Not Available	mg/m2;Not Available;Not Available;mg/m2;mg;mg/m2;Not Available	Not Available;Not Available;Not Available;Not Available;Not Available;Not Available;Not Available	2009;2009;2009;2009;2009;2009;2009	Not Available	NOT HISPANIC OR LATINO	TCGA-09-0369-F24217	1df2523e-6d80-4fbd-b56a-101649dd493a
TCGA-24-0968	FEMALE	598	Serous Cystadenocarcinoma	Ovary	Dead	Stage IIIC	G3	0	598			WITH TUMOR		59	Left	TCGA-24-0968	619b14f3-b8cc-4c0a-8304-6719853d592a	10	-21664	Not Available	0	598	TCGA-24-0968-D25886;TCGA-24-0968-D25881;TCGA-24-0968-D25884;TCGA-24-0968-D25885;TCGA-24-0968-D25888;TCGA-24-0968-D25882;TCGA-24-0968-D25887;TCGA-24-0968-D25883;TCGA-24-0968-D25889	98a1282c-fc9a-4ae4-a806-3cd66d04a656;33f57318-3e28-48d4-b198-23a2ab37b5ea;e3ed5ab9-5714-4914-8344-71cafcd55745;4bd719b9-d64e-4581-85e3-5806c52eecc0;44789b67-0fe7-4ee7-9461-8adc8b68a710;80e7d102-6aab-4e2b-a2f5-5e98667313d4;3b897a94-6154-4608-9a7b-720eb376d971;46c69a64-5995-4736-b17c-f77e8e340301;c04896d2-d54b-40dc-a0dd-6dae1fccadd8	Not Available;Not Available;Not Available;Not Available;Not Available;Not Available;Not Available;Not Available;Not Available	10;10;10;10;10;10;10;10;25	Not Available;119;Not Available;Not Available;Not Available;119;Not Available;Not Available;Not Available	Not Available;35;Not Available;Not Available;Not Available;35;Not Available;Not Available;Not Available	Topotecan;Carboplatin;Cisplatin;Gemzar;Cytoxan;Paclitaxel;Navelbine;Doxil;Gemzar	Not Available;Not Available;Not Available;Not Available;Not Available;Not Available;Not Available;Not Available;Not Available	3;3;3;3;3;3;3;3;2	4;5;1;1;Not Available;5;4;1;1	Not Available;Not Available;Not Available;Not Available;Not Available;Not Available;Not Available;Not Available;Not Available	Not Available;mg;Not Available;Not Available;mg/day;mg;Not Available;Not Available;Not Available	PROGRESSION;ADJUVANT;OTHER, SPECIFY IN NOTES;OTHER, SPECIFY IN NOTES;PROGRESSION;ADJUVANT;PROGRESSION;OTHER, SPECIFY IN NOTES;OTHER, SPECIFY IN NOTES	Not Applicable;Not Applicable;Persitant disease; Given with Gemzar;Persitant Disease; Given 1x with Doxil;Not Applicable;Not Applicable;Not Applicable;Persitant Disease; Given with Gemzar;Persistant disease; Given 1x with Cisplatin	Not Available;Not Available;Not Available;Not Available;Not Available;Not Available;Not Available;Not Available;Not Available	IV;IV;IV;IV;PO;IV;IV;IV;IV	NO;NO;NO;NO;NO;NO;NO;NO;NO	Chemotherapy;Chemotherapy;Chemotherapy;Chemotherapy;Chemotherapy;Chemotherapy;Chemotherapy;Chemotherapy;Chemotherapy	Not Available;Not Available;Not Available;Not Available;Not Available;Not Available;Not Available;Not Available;Not Available	Not Available;2790;Not Available;Not Available;50;1378;Not Available;Not Available;Not Available	Not Available;mg;Not Available;Not Available;mg/day;mg;Not Available;Not Available;Not Available	Not Available;Not Available;Not Available;Not Available;Not Available;Not Available;Not Available;Not Available;Not Available	2009;2009;2009;2009;2009;2009;2009;2009;2010	Not Available	Not Available	TCGA-24-0968-F25880	f0d9fae8-b67d-4afc-b337-8433ef184f86
TCGA-04-1652	FEMALE	969	Serous Cystadenocarcinoma	Ovary	Dead	Stage IIIC	G2	1	880		Recurrence	WITH TUMOR		76	Right	TCGA-04-1652	d86adfac-56be-4a69-9315-5a90b4113e65	2	-28101	969	0	Not Available	TCGA-04-1652-D24180;TCGA-04-1652-D24181;TCGA-04-1652-D24183;TCGA-04-1652-D24182	6f994167-d0ff-4613-a3f7-193b4dc243f6;7c7d1c47-ed7b-411b-b974-274f7e527369;e710f8e4-0ad9-47d6-9682-6bb5c7ec4ca1;bc27edb0-7d82-454f-9fcf-dfaefff83fad	Not Available;Not Available;Not Available;Not Available	17;17;17;17	199;199;955;199	60;60;894;60	Carboplatin;Paciltaxel;Docetaxel;Gemicitabine	Not Available;Not Available;Not Available;Not Available	11;11;11;11	08;08;04;08	Not Available;Not Available;Not Available;Not Available	AUC;mg/m2;mg/m2;mg/m2	ADJUVANT;ADJUVANT;RECURRENCE;ADJUVANT	Not Applicable;Not Applicable;Not Applicable;Not Applicable	Not Available;Not Available;Not Available;Not Available	IV;IV;IV;IV	NO;NO;NO;NO	Chemotherapy;Chemotherapy;Chemotherapy;Chemotherapy	Not Available;Not Available;Not Available;Not Available	5;175;30;800	AUC;mg/m2;mg/m2;mg/m2	Not Available;Not Available;Not Available;Not Available	2009;2009;2009;2009	Not Available	Not Available	TCGA-04-1652-F24179	cbce6aad-81f9-4b94-9970-869f1d53218e
TCGA-57-1586	FEMALE	679	Serous Cystadenocarcinoma	Ovary	Alive	Stage IIIC	G3	1	259		Recurrence	WITH TUMOR		66	Bilateral	TCGA-57-1586	48e66676-dbed-48a4-9a7f-a6d247b15c17	2	-24304	Not Applicable	0	679	TCGA-57-1586-D28081;TCGA-57-1586-D28083;TCGA-57-1586-D28086;TCGA-57-1586-D28088;TCGA-57-1586-D28085;TCGA-57-1586-D28084;TCGA-57-1586-D28087;TCGA-57-1586-D28082	bbf33820-9f76-4cfb-afe0-79a5c0eb3edb;d67969e3-a53c-49a7-9e9d-e199f334de35;f5064788-37a0-4453-8e48-7afd74568b5a;c50fed41-30b0-467a-9fce-96067cfa97d2;154aa145-3583-4eae-b349-106673305fb4;5948359f-b509-4b5a-ba6a-be19c611bbce;ded42d21-aa2e-4520-a82a-0e2c905d3c55;39d706ee-04ea-4d4b-b740-faa6cc534736	Not Available;Not Available;Not Available;Not Available;Not Available;Not Available;Not Available;Not Available	15;15;15;15;15;15;15;15	163;Not Available;542;Not Available;406;Not Available;Not Available;163	49;259;433;553;323;259;553;49	Taxol;Gemzar;Topotecan;Taxol;Doxil;Cisplatin;Carboplatin;Carboplatin	Not Available;Not Available;Not Available;Not Available;Not Available;Not Available;Not Available;Not Available	9;9;9;9;9;9;9;9	08;04;Not Available;01;03;04;01;08	Not Available;Not Available;Not Available;Not Available;Not Available;Not Available;Not Available;Not Available	Not Available;Not Available;Not Available;Not Available;Not Available;Not Available;Not Available;Not Available	ADJUVANT;PROGRESSION;PROGRESSION;PROGRESSION;PROGRESSION;PROGRESSION;PROGRESSION;ADJUVANT	Not Applicable;Not Applicable;Not Applicable;Not Applicable;Not Applicable;Not Applicable;Not Applicable;Not Applicable	Not Available;Not Available;Not Available;Not Available;Not Available;Not Available;Not Available;Not Available	Not Available;Not Available;Not Available;Not Available;Not Available;Not Available;Not Available;Not Available	NO;NO;NO;NO;NO;NO;NO;NO	Chemotherapy;Chemotherapy;Chemotherapy;Chemotherapy;Chemotherapy;Chemotherapy;Chemotherapy;Chemotherapy	Not Available;Not Available;Not Available;Not Available;Not Available;Not Available;Not Available;Not Available	Not Available;Not Available;Not Available;Not Available;Not Available;Not Available;Not Available;Not Available	Not Available;Not Available;Not Available;Not Available;Not Available;Not Available;Not Available;Not Available	Not Available;Not Available;Not Available;Not Available;Not Available;Not Available;Not Available;Not Available	2009;2009;2009;2009;2009;2009;2009;2009	Not Available	NOT HISPANIC OR LATINO	TCGA-57-1586-F28080	63a6f203-f1b7-48b2-bb80-5d6fd277e34c
TCGA-61-1743	FEMALE	1329	Serous Cystadenocarcinoma	Ovary	Dead	Stage IIC	G2	1	809		Recurrence	WITH TUMOR		53	Bilateral	TCGA-61-1743	a3e26259-732b-49fb-bc95-2f0ec7a0494e	2	-19365	1329	0	1329	TCGA-61-1743-D28211;TCGA-61-1743-D28210	90ea70e1-cefe-4bee-b0bb-c04b6269d3a3;030502fa-6d42-4a5a-a3af-eedba0383040	Not Available;Not Available	30;30	172;172	40;40	Carboplatin;Taxol	Not Available;Not Available	11;11	06;06	Not Available;Not Available	Not Available;Not Available	ADJUVANT;ADJUVANT	Not Applicable;Not Applicable	Not Available;Not Available	IV;IV	NO;NO	Chemotherapy;Chemotherapy	Not Available;Not Available	Not Available;Not Available	Not Available;Not Available	Not Available;Not Available	2009;2009	Not Available	NOT HISPANIC OR LATINO	TCGA-61-1743-F28209	b213f402-12f7-443a-bce1-f344086505fb
TCGA-20-1685	FEMALE	508	Serous Cystadenocarcinoma	Ovary	Alive	Stage IIIC	G3	0	508			TUMOR FREE		45	Bilateral	TCGA-20-1685	cbc5b936-ead5-4858-ab90-e639402789b0	2	-16745	Not Applicable	0	508	TCGA-20-1685-D25556;TCGA-20-1685-D25555;TCGA-20-1685-D25557	61e2a648-eede-4da8-98d8-b59dd2b3d85a;480d3ba4-151c-424e-ac1c-bbfeb855e517;431a1b7d-0bb3-4262-bf04-9b427b1764d9	Not Available;Not Available;Not Available	27;27;27	144;144;144	39;39;39	Carboplatin;Bevacizumab;Taxol	Not Available;Not Available;Not Available	7;7;7	06;06;06	Not Available;Not Available;Not Available	Not Available;mg/kg;mg/m2	ADJUVANT;ADJUVANT;ADJUVANT	Not Applicable;Not Applicable;Not Applicable	Not Available;Not Available;Not Available	IV;IV;IV	NO;NO;NO	Chemotherapy;Chemotherapy;Chemotherapy	Not Available;Not Available;Not Available	6;15;175	Not Available;mg/kg;mg/m2	Not Available;Not Available;Not Available	2009;2009;2009	0	NOT HISPANIC OR LATINO	TCGA-20-1685-F25554	f74f942b-3336-4eab-b6f5-96ea2715a52e
TCGA-13-1405	FEMALE	868	Serous Cystadenocarcinoma	Ovary	Dead	Stage IV	G3	1	228			TUMOR FREE		49	Bilateral	TCGA-13-1405	29dccd25-4c4a-463b-a353-38a193337f38	20	-18218	Not Applicable	0	224	TCGA-13-1405-D24804;TCGA-13-1405-D24805	e2a55a7f-4bfd-43db-bd46-3d41ad1008e8;036b3384-1b94-4426-af17-f314a1c6fe38	Not Available;Not Available	30;30	147;147	23;23	Carboplatin;Paclitaxel	Not Available;Not Available	6;6	7;7	Not Available;Not Available	mg;mg/m2	ADJUVANT;ADJUVANT	Not Applicable;Not Applicable	Not Available;Not Available	IV;IV	NO;NO	Chemotherapy;Chemotherapy	Not Available;Not Available	599;175	mg;mg/m2	Not Available;Not Available	2009;2009	Not Available	NOT HISPANIC OR LATINO	TCGA-13-1405-F24803;TCGA-13-1405-F72656	94feaf68-9597-4648-bc84-fe7e67afc7c7;ADA5AB3C-26E6-46CE-9F56-F7C4F3B47AC2
TCGA-29-1691	FEMALE	1470	Serous Cystadenocarcinoma	Ovary	Dead	Stage IIIC	G2	1	613		Recurrence	WITH TUMOR		51	Bilateral	TCGA-29-1691	b4225c44-b9b6-46c5-aabf-7b0d9a9fe20b	2	-18664	1470	0	1435	TCGA-29-1691-D27150;TCGA-29-1691-D27149;TCGA-29-1691-D27155;TCGA-29-1691-D27152;TCGA-29-1691-D27154;TCGA-29-1691-D27156;TCGA-29-1691-D27151;TCGA-29-1691-D27157;TCGA-29-1691-D27153	af52351f-2a65-4bab-8bf4-573d7d8c7298;5981636e-0c5c-47af-832a-7eb7e79b6129;877c785c-7487-4730-b800-ec7ca6a067f5;75e41a0f-d235-4fb2-bf9f-34dc7fff8807;a5cf93f1-4cc5-4e17-bfaf-4fa8c64efbb5;af8df55a-1129-4a08-ac99-6b6e6328d6ed;3c9233cf-e2f4-4c15-835e-c8f00dafb4a7;56c9442e-1bb2-4585-8583-da00a67982b0;3cf322bf-45f6-4d30-896a-5a44d2a27e15	Not Available;Not Available;Not Available;Not Available;Not Available;Not Available;Not Available;Not Available;Not Available	18;18;16;16;16;16;16;16;16	137;137;1353;868;Not Available;1353;868;Not Available;Not Available	Not Available;Not Available;1233;654;988;1233;654;988;868	Paclitaxel;Cisplatin;Cytoxan;Paclitaxel;Doxil;Carboplatin;Carboplatin;Megace (oral);Topotecan	Not Available;Not Available;Not Available;Not Available;Not Available;Not Available;Not Available;Not Available;Not Available	12;12;2;2;2;2;2;2;2	06;06;Not Available;06;Not Available;Not Available;06;Not Available;Not Available	Not Available;Not Available;Not Available;Not Available;Not Available;Not Available;Not Available;Not Available;Not Available	Not Available;Not Available;Not Available;mg/m2;Not Available;Not Available;AUC;Not Available;Not Available	ADJUVANT;ADJUVANT;PROGRESSION;RECURRENCE;PROGRESSION;PROGRESSION;RECURRENCE;PROGRESSION;PROGRESSION	Not Applicable;Not Applicable;Not Applicable;Not Applicable;Not Applicable;Not Applicable;Not Applicable;Not Applicable;Not Applicable	Not Available;Not Available;Not Available;Not Available;Not Available;Not Available;Not Available;Not Available;Not Available	IV;IV;IP;IV;IP;IV;IP;IV;IP;IV;IP;IV;PO;IP;IV	NO;NO;NO;NO;NO;NO;NO;NO;NO	Chemotherapy;Chemotherapy;Chemotherapy;Chemotherapy;Chemotherapy;Chemotherapy;Chemotherapy;Hormone Therapy;Chemotherapy	Not Available;Not Available;Not Available;Not Available;Not Available;Not Available;Not Available;Not Available;Not Available	Not Available;Not Available;Not Available;175;Not Available;Not Available;5;Not Available;Not Available	Not Available;Not Available;Not Available;mg/m2;Not Available;Not Available;AUC;Not Available;Not Available	Not Available;Not Available;Not Available;Not Available;Not Available;Not Available;Not Available;Not Available;Not Available	2009;2009;2010;2010;2010;2010;2010;2010;2010	Not Available	Not Available	TCGA-29-1691-F27148	cd9c0017-f19f-4f93-983c-3b4f58156aed
TCGA-09-1670	FEMALE	547	Serous Cystadenocarcinoma	Ovary	Alive	Stage IIIA	G3	1	547		Recurrence	WITH TUMOR		57	Bilateral	TCGA-09-1670	60014a6e-6a13-4f92-bbfd-eeeee9632f98	2	-21147	Not Applicable	0	547	TCGA-09-1670-D24310;TCGA-09-1670-D24312;TCGA-09-1670-D24311	0425c8ba-5351-4002-8ce5-99d9f36dac5d;a9036291-7a11-408c-bf4d-69e72c45fe65;e72190f5-2626-4416-8a8c-e8435831131c	Not Available;Not Available;Not Available	6;6;6	Not Available;179;179	Not Available;74;74	Taxol;Taxol;Carboplatin	Not Available;Not Available;Not Available	8;8;8	Not Available;6;6	Not Available;Not Available;Not Available	Not Available;mg/m2;Not Available	OTHER, SPECIFY IN NOTES;ADJUVANT;ADJUVANT	Not Available;Not Applicable;Not Applicable	Not Available;Not Available;Not Available	IV;IV;IV	NO;NO;NO	Chemotherapy;Chemotherapy;Chemotherapy	Not Available;Not Available;Not Available	Not Available;175;6	Not Available;mg/m2;Not Available	Not Available;Not Available;Not Available	2009;2009;2009	Not Available	Not Available	TCGA-09-1670-F24309	80b17801-1c09-408a-bb5b-a95402c021c0
TCGA-13-1488	FEMALE	2154	Serous Cystadenocarcinoma	Ovary	Dead	Stage IV	G3	1	351		Recurrence	WITH TUMOR		59	Bilateral	TCGA-13-1488	a85f6f9c-1e1d-44fc-85eb-3b2d96cfbc61	31	-21726	2154	0	2154	TCGA-13-1488-D24873;TCGA-13-1488-D24872	8b1f61bc-dd0d-42e7-818b-d437b5b7c0a6;72712026-5c3c-4b6c-9520-11796bee3a34	Not Available;Not Available	30;30	165;165	8;8	Paciltaxel;Carboplatin	Not Available;Not Available	6;6	8;8	Not Available;Not Available	mg/m2;Not Available	ADJUVANT;ADJUVANT	Not Applicable;Not Applicable	Not Available;Not Available	IV;IV	NO;NO	Chemotherapy;Chemotherapy	Not Available;Not Available	175;5	mg/m2;Not Available	Not Available;Not Available	2009;2009	Not Available	NOT HISPANIC OR LATINO	TCGA-13-1488-F24871	f8cc6ee8-0004-4c4c-9d2e-38888cd6c5c4
TCGA-10-0930	FEMALE	1040	Serous Cystadenocarcinoma	Ovary	Dead	Stage IIIC	G3	1	680		Recurrence	WITH TUMOR		70	Left	TCGA-10-0930	99f1ae02-86ec-4d93-8cd4-650bf6f02c10	6	-25737	1040	0	1011	TCGA-10-0930-D24434;TCGA-10-0930-D24438;TCGA-10-0930-D24436;TCGA-10-0930-D24433;TCGA-10-0930-D24437;TCGA-10-0930-D24435	bfd5b64b-62d5-4c17-8783-e6dbbf799d03;07366f75-ef12-4507-a120-de282ff35bb7;9e40afd1-1f30-4db6-9986-40cd5b982b0f;5c3e10dc-5d6b-4948-ba8b-4ac663d8e8db;548ef658-969a-490c-9410-cf5e38504c2a;d0b6b8e2-d04f-4bac-9938-6ce9760f5018	Not Available;Not Available;Not Available;Not Available;Not Available;Not Available	18;18;18;18;18;18	124;Discrepancy;736;124;838;736	8;Discrepancy;694;8;782;694	Carboplatin;Tamoxifen;Carbo;Taxol;Doxil;Taxol	Not Available;Not Available;Not Available;Not Available;Not Available;Not Available	3;3;3;3;3;3	06;Not Available;03;06;03;03	Not Available;Not Available;Not Available;Not Available;Not Available;Not Available	mg/m2;mg/m2;mg/m2;mg/m2;mg/m2;mg/m2	ADJUVANT;RECURRENCE;RECURRENCE;ADJUVANT;RECURRENCE;RECURRENCE	Not Applicable;Not Applicable;Not Applicable;Not Applicable;Not Applicable;Not Applicable	Not Available;Not Available;Not Available;Not Available;Not Available;Not Available	IV;IV;IV;IV;IV;IV	NO;NO;Not Available;NO;NO;NO	Chemotherapy;Hormone Therapy;Chemotherapy;Chemotherapy;Chemotherapy;Chemotherapy	Not Available;Not Available;Not Available;Not Available;Not Available;Not Available	2520;2400;250;1800;210;810	mg/m2;mg/m2;mg/m2;mg/m2;mg/m2;mg/m2	Not Available;Not Available;Not Available;Not Available;Not Available;Not Available	2009;2009;2009;2009;2009;2009	Not Available	Not Available	TCGA-10-0930-F24432	7e161c2d-e784-4e5e-927a-f8aceb86f854
TCGA-13-1482	FEMALE	1877	Serous Cystadenocarcinoma	Ovary	Dead	Stage IV	G2	1	602		Recurrence	WITH TUMOR		52	Not Available	TCGA-13-1482	f3af727e-b592-4828-94f5-22008666cf8c	31	-19178	1877	0	1877	TCGA-13-1482-D24850;TCGA-13-1482-D24849	0b9deb4b-3ed0-4350-bfc1-daadb62afa14;15515ea8-488a-4962-8719-11b9d4bda728	Not Available;Not Available	30;30	152;152	33;33	Paciltaxel;Carboplatin	Not Available;Not Available	6;6	6;6	Not Available;Not Available	mg/m2;Not Available	ADJUVANT;ADJUVANT	Not Applicable;Not Applicable	Not Available;Not Available	IV;IV	NO;NO	Chemotherapy;Chemotherapy	Not Available;Not Available	175;5	mg/m2;Not Available	Not Available;Not Available	2009;2009	Not Available	NOT HISPANIC OR LATINO	TCGA-13-1482-F24848	6827f11a-2b5c-4f30-9223-474c514708e6
TCGA-13-0726	FEMALE	949	Serous Cystadenocarcinoma	Ovary	Dead	Stage IIIC	GX	1	392		Recurrence	WITH TUMOR		55	Bilateral	TCGA-13-0726	32960bc7-839a-42c5-9460-3917fa578ffc	24	-20134	949	0	946	TCGA-13-0726-D24517;TCGA-13-0726-D24516	9297737f-6669-4c71-858d-095117428338;f8476d0c-e091-4678-a588-e33fdb388ee4	Not Available;Not Available	16;16	169;169	29;29	Paclitaxel;Carboplatin	Not Available;Not Available	4;4	7;7	Not Available;Not Available	mg/m2;Not Available	ADJUVANT;ADJUVANT	Not Applicable;Not Applicable	Not Available;Not Available	IV;IV	Not Available;Not Available	Chemotherapy;Chemotherapy	Not Available;Not Available	175;Not Available	mg/m2;Not Available	Not Available;Not Available	2009;2009	Not Available	NOT HISPANIC OR LATINO	TCGA-13-0726-F24515	b95035b9-c865-4fe8-88c3-f5723ea3ad15
TCGA-25-1635	FEMALE	1583	Serous Cystadenocarcinoma	Ovary	Dead	Stage IIIC	G3	1	614		Recurrence	WITH TUMOR		71	Bilateral	TCGA-25-1635	bc2591b0-65d7-48c3-a5cc-783f67b65869	2	-26200	1583	0	1558	TCGA-25-1635-D26758;TCGA-25-1635-D26757;TCGA-25-1635-D26761;TCGA-25-1635-D26759;TCGA-25-1635-D26760	6c145dd3-1953-43e8-8e9d-9837ebbe110c;f2c02abe-3a05-4bc0-914c-48f367820dfa;71ad95f2-916c-4bfe-8f65-738b7c70f090;cedc0d74-6848-4ad4-b8b1-73046c2b6d83;c428925d-3fb6-46e7-87a4-90747d2e33b9	Not Available;Not Available;Not Available;Not Available;Not Available	17;17;17;17;17	233;233;741;233;741	24;24;614;24;614	Gemzar;Taxol;Taxol;Carboplatin;Carboplatin	Not Available;Not Available;Not Available;Not Available;Not Available	6;6;6;6;6	8;08;4;8;4	Not Available;Not Available;Not Available;Not Available;Not Available	Not Available;Not Available;Not Available;Not Available;Not Available	ADJUVANT;ADJUVANT;RECURRENCE;ADJUVANT;RECURRENCE	Not Applicable;Not Applicable;Not Applicable;Not Applicable;Not Applicable	Not Available;Not Available;Not Available;Not Available;Not Available	IV;IV;IV;IV;IV	NO;NO;NO;NO;NO	Chemotherapy;Chemotherapy;Chemotherapy;Chemotherapy;Chemotherapy	Not Available;Not Available;Not Available;Not Available;Not Available	Not Available;Not Available;Not Available;Not Available;Not Available	Not Available;Not Available;Not Available;Not Available;Not Available	Not Available;Not Available;Not Available;Not Available;Not Available	2009;2009;2009;2009;2009	Not Available	NOT HISPANIC OR LATINO	TCGA-25-1635-F26756	ba5104ee-89a9-455e-bff2-e4f3bec0a20b
TCGA-04-1347	FEMALE	1919	Serous Cystadenocarcinoma	Ovary	Alive	Stage IV	G3	0	1919			TUMOR FREE		81	Bilateral	TCGA-04-1347	f0c353fd-947c-41e2-b643-3ecc0d69796c	26	-29695	Not Applicable	0	1919	TCGA-04-1347-D23962;TCGA-04-1347-D23964;TCGA-04-1347-D23963;TCGA-04-1347-D23965	064dd296-90e7-493a-a26b-0e9d1aa58b13;a176cad9-0e04-4138-802e-18d4935f981f;8ee7bc23-3af3-437e-a1c3-82da7ded82ba;2f680d7c-a16e-4c02-97dc-b8735edfd538	Not Available;Not Available;Not Available;Not Available	9;9;9;9	173;173;173;173	19;19;19;19	Taxol;Carboplatin;Carboplatin;Taxotere	Not Available;Not Available;Not Available;Not Available	11;11;11;11	6;2;6;2	Not Available;Not Available;Not Available;Not Available	mg;mg;mg;mg	ADJUVANT;ADJUVANT;ADJUVANT;ADJUVANT	Not Applicable;Not Applicable;Not Applicable;Not Applicable	Not Available;Not Available;Not Available;Not Available	IV;IV;IV;IV	NO;NO;NO;NO	Chemotherapy;Chemotherapy;Chemotherapy;Chemotherapy	Not Available;Not Available;Not Available;Not Available	1764;750;2400;200	mg;mg;mg;mg	Not Available;Not Available;Not Available;Not Available	2009;2009;2009;2009	0	NOT HISPANIC OR LATINO	TCGA-04-1347-F23961	930a5b42-2e0e-4912-901d-b712de302d38
TCGA-24-1544	FEMALE	820	Serous Cystadenocarcinoma	Ovary	Dead	Stage IIIC	G3	1	643		Progression of Disease	WITH TUMOR		71	Bilateral	TCGA-24-1544	21f6bf91-dfc6-4a59-8b76-88a0f95c7b47	2	-26141	820	0	820	TCGA-24-1544-D26086;TCGA-24-1544-D26083;TCGA-24-1544-D26082;TCGA-24-1544-D26084;TCGA-24-1544-D26081;TCGA-24-1544-D26085	0270a543-8f1d-42a0-a604-ddd1749bb8cd;accbdf55-0909-4132-b4d5-18989608b05f;10643fbe-cd7a-449d-97de-e788fcb322c4;20b56992-e730-4408-b8ea-3e27d43407b5;6cf2832e-8a89-462e-8fea-dd6919a4d1a1;b0f731bc-150c-4aa5-a5e0-66f092fb26cd	Not Available;Not Available;Not Available;Not Available;Not Available;Not Available	28;28;28;28;28;28	799;203;203;470;203;638	777;18;18;243;18;533	Carboplatin;Taxol;Topotecan;Doxil;Carboplatin;Taxol	Not Available;Not Available;Not Available;Not Available;Not Available;Not Available	7;7;7;7;7;7	02;08;08;09;08;04	Not Available;Not Available;Not Available;Not Available;Not Available;Not Available	mg;mg;mg;mg;mg;mg	PROGRESSION;ADJUVANT;ADJUVANT;OTHER, SPECIFY IN NOTES;ADJUVANT;PROGRESSION	Not Applicable;Not Applicable;Not Applicable;Persistent stabel disease;Not Applicable;Not Applicable	Not Available;Not Available;Not Available;Not Available;Not Available;Not Available	IV;IV;IV;IV;IV;IV	NO;NO;NO;NO;NO;NO	Chemotherapy;Chemotherapy;Chemotherapy;Chemotherapy;Chemotherapy;Chemotherapy	Not Available;Not Available;Not Available;Not Available;Not Available;Not Available	595;1356;12.6;2100;3080;2500	mg;mg;mg;mg;mg;mg	Not Available;Not Available;Not Available;Not Available;Not Available;Not Available	2009;2009;2009;2009;2009;2009	Not Available	Not Available	TCGA-24-1544-F26080	56ec21c8-c3b5-41b3-abdc-964351237f88
TCGA-23-1120	FEMALE	130	Serous Cystadenocarcinoma	Ovary	Alive	Stage IIIC	G3	0	130			Not Available		60	Right	TCGA-23-1120	fdf83fdf-dfbb-4306-9a1b-b4487d18b402	24	-22148	Not Applicable	0	130	TCGA-23-1120-D25717;TCGA-23-1120-D25716	14e5fa9c-6598-4755-8dcf-a2ad8f0253c2;706a2a1b-ec67-4c1e-9588-9ad9b8a629ef	Not Available;Not Available	1;1	146;146	63;63	Paclitaxel;Cisplatin	Not Available;Not Available	4;4	05;05	Not Available;Not Available	mg;mg	ADJUVANT;ADJUVANT	Not Applicable;Not Applicable	Not Available;Not Available	IP;IP	Not Available;Not Available	Chemotherapy;Chemotherapy	Not Available;Not Available	2090;700	mg;mg	Not Available;Not Available	2009;2009	Not Available	NOT HISPANIC OR LATINO	TCGA-23-1120-F25715	1f657a1b-69cb-4138-929b-aecb50c96b69
TCGA-10-0934	FEMALE	204	Serous Cystadenocarcinoma	Ovary	Dead	Stage IIIC	G3	1	111		Recurrence	WITH TUMOR		50	Bilateral	TCGA-10-0934	65ddccd2-70a7-48b3-88e1-9d6fd1dcd11b	6	-18602	204	0	119	TCGA-10-0934-D24459;TCGA-10-0934-D24460	369dd738-d6cc-4e91-a5bb-a317fe8f262b;8905b636-eb21-4da2-9c21-10097b036851	Not Available;Not Available	18;18	56;56	40;40	Taxol;Carboplatin	Not Available;Not Available	3;3	3;3	Not Available;Not Available	mg/m2;Not Available	ADJUVANT;ADJUVANT	Not Applicable;Not Applicable	Not Available;Not Available	IV;IV	NO;NO	Chemotherapy;Chemotherapy	Not Available;Not Available	525;Not Available	mg/m2;Not Available	Not Available;Not Available	2009;2009	Not Available	NOT HISPANIC OR LATINO	TCGA-10-0934-F24458	0d547712-8f13-4099-8c98-dbbd9132acee
TCGA-13-0908	FEMALE	1843	Serous Cystadenocarcinoma	Ovary	Dead	Stage IV	G3	1	552		Recurrence	WITH TUMOR		58	Bilateral	TCGA-13-0908	0ba7b6cc-e5f5-47d7-859a-24e31aa336ab	20	-21422	Not Applicable	0	1364	TCGA-13-0908-D24741;TCGA-13-0908-D24740;TCGA-13-0908-D24742	e0ae3a10-31dd-43b6-b2f1-bebf0fc5128b;411e47eb-8e4a-4db8-90e6-dab616f52f95;a715aa27-039d-4fc8-b247-fc6db02155cf	Not Available;Not Available;Not Available	30;30;30	135;135;244	24;24;198	Paciltaxel;Carboplatin;Cisplatin	Not Available;Not Available;Not Available	6;6;6	6;6;3	Not Available;Not Available;Not Available	mg/m2;Not Available;mg/m2	ADJUVANT;ADJUVANT;ADJUVANT	Not Applicable;Not Applicable;Not Applicable	Not Available;Not Available;Not Available	IV;IV;IP	NO;NO;NO	Chemotherapy;Chemotherapy;Chemotherapy	Not Available;Not Available;Not Available	175;6;70	mg/m2;Not Available;mg/m2	Not Available;Not Available;Not Available	2009;2009;2009	Not Available	NOT HISPANIC OR LATINO	TCGA-13-0908-F24739;TCGA-13-0908-F72639	93339bf4-f92d-41ed-bba7-29236a13ccd3;577767E5-13E5-4E9B-B035-DCE895BDD1C3
TCGA-13-1504	FEMALE	1059	Serous Cystadenocarcinoma	Ovary	Dead	Stage IIIC	G3	1	548			TUMOR FREE		68	Bilateral	TCGA-13-1504	cd49126a-ec15-43fa-9e43-3f7460d43f2b	31	-25008	Not Applicable	0	504	TCGA-13-1504-D24937;TCGA-13-1504-D24936	3bc4b2ec-79d0-491f-81ea-9d7c5eb58a96;92d2f0c8-9875-41f1-8429-6a929ec4166f	Not Available;Not Available	29;29	283;283	Not Available;Not Available	Paclitaxel;Carboplatin	Not Available;Not Available	6;6	Not Available;Not Available	Not Available;Not Available	Not Available;Not Available	ADJUVANT;ADJUVANT	Not Applicable;Not Applicable	Not Available;Not Available	IV;IV	NO;NO	Chemotherapy;Chemotherapy	Not Available;Not Available	Not Available;Not Available	Not Available;Not Available	Not Available;Not Available	2009;2009	Not Available	NOT HISPANIC OR LATINO	TCGA-13-1504-F24935;TCGA-13-1504-F72652	7c17b972-4f30-4f6f-8771-949a26381448;34F26CCF-A381-4A8E-803A-E548A51521CC
TCGA-13-1500	FEMALE	425	Serous Cystadenocarcinoma	Ovary	Dead	Stage IIIC	G3	1	253		Recurrence	WITH TUMOR		71	Bilateral	TCGA-13-1500	a285786d-120e-4c88-b48b-8111f4413988	31	-26172	425	0	425	TCGA-13-1500-D24928;TCGA-13-1500-D24929;TCGA-13-1500-D24927	15ffe254-2600-4046-bf65-1dd44c66bad5;f7997b39-d17f-4df6-b167-9f763ba44acb;f6462173-d369-423a-b1fc-560c5243c71d	Not Available;Not Available;Not Available	29;29;29	136;225;136	Not Available;197;Not Available	Paclitaxel;Cisplatin;Carboplatin	Not Available;Not Available;Not Available	6;6;6	6;2;6	Not Available;Not Available;Not Available	Not Available;mg/m2;Not Available	ADJUVANT;ADJUVANT;ADJUVANT	Not Applicable;Not Applicable;Not Applicable	Not Available;Not Available;Not Available	IV;IP;IV	NO;NO;Not Available	Chemotherapy;Chemotherapy;Chemotherapy	Not Available;Not Available;Not Available	Not Available;40;Not Available	Not Available;mg/m2;Not Available	Not Available;Not Available;Not Available	2009;2009;2009	Not Available	NOT HISPANIC OR LATINO	TCGA-13-1500-F24926	4ea742f9-e3d0-493b-bf36-ce751235de74
TCGA-30-1857	FEMALE	8	Serous Cystadenocarcinoma	Ovary	Dead	Stage IV	G3	0	8			WITH TUMOR		64	Right	TCGA-30-1857	45baebac-32ae-4093-9eba-488b95c1a58d	2	-23689	8	0	8																								Not Available	NOT HISPANIC OR LATINO	TCGA-30-1857-F27564	1e076431-07c6-4bfb-a0e1-fbe4498b5035
TCGA-04-1351	FEMALE	1991	Serous Cystadenocarcinoma	Ovary	Alive	Stage IIIC	G2	1	1658		Recurrence	TUMOR FREE		76	Not Available	TCGA-04-1351	12b032ed-ff92-4bfe-b980-eb273ae8ae17	26	-28045	Not Applicable	0	1991	TCGA-04-1351-D24002;TCGA-04-1351-D24003	a7c3ad1f-4d37-4b3e-9b47-d4ec008b2874;b6d20430-8f48-46d9-876a-65ed5004e96e	Not Available;Not Available	23;23	Not Available;Not Available	Not Available;Not Available	Not Available;Not Available	Not Available;Not Available	12;12	Not Available;Not Available	Not Available;Not Available	Not Available;Not Available	ADJUVANT;RECURRENCE	Not Applicable;Not Applicable	Not Available;Not Available	Not Available;Not Available	Not Available;Not Available	Chemotherapy;Chemotherapy	Not Available;Not Available	Not Available;Not Available	Not Available;Not Available	Not Available;Not Available	2009;2009	Not Available	NOT HISPANIC OR LATINO	TCGA-04-1351-F24001	32e5fadb-7231-48fb-b1fe-54e0acf09411
TCGA-10-0926	FEMALE	788	Serous Cystadenocarcinoma	Ovary	Dead	Stage IIIC	G3	1	287		Recurrence	WITH TUMOR		63	Bilateral	TCGA-10-0926	e641aed9-1dd8-4c30-b231-f12b20a76df0	6	-23307	788	0	788	TCGA-10-0926-D24416;TCGA-10-0926-D24414;TCGA-10-0926-D24415;TCGA-10-0926-D24417	2ed5c38f-994f-4aae-ad6f-2be5d242946e;7d7d38a9-711f-480d-a3f2-1c866145b0aa;8651d712-bb73-4b45-bbcf-1f5054c30742;a6419a7d-cf48-41ab-ae3c-4e1e5746e9ad	Not Available;Not Available;Not Available;Not Available	18;18;18;18	729;143;143;Not Available	290;8;8;232	Doxil;Taxol;Carboplatin;Interleukin-12	Not Available;Not Available;Not Available;Not Available	3;3;3;3	13;06;06;Not Available	Not Available;Not Available;Not Available;Not Available	mg;mg;mg;mg	RECURRENCE;OTHER, SPECIFY IN NOTES;OTHER, SPECIFY IN NOTES;OTHER, SPECIFY IN NOTES	Not Applicable;Adjuvant and Progression;Ajuvant and Progression;Adjuvant and Progression	Not Available;Not Available;Not Available;Not Available	IV;IV;IV;IV	NO;NO;NO;Not Available	Chemotherapy;Chemotherapy;Chemotherapy;Immunotherapy	Not Available;Not Available;Not Available;Not Available	975;860;4500;22,920	mg;mg;mg;mg	Not Available;Not Available;Not Available;Not Available	2009;2009;2009;2009	Not Available	Not Available	TCGA-10-0926-F24413	7f3cdaf9-ed64-4b9a-8f24-2e9037eb0f86
TCGA-25-2408	FEMALE	943	Serous Cystadenocarcinoma	Ovary	Dead	Stage IV	G2	1	334		Recurrence	WITH TUMOR		37	Bilateral	TCGA-25-2408	fdd4adb8-9295-480a-9352-305b5eb51187	5	-13606	943	0	943	TCGA-25-2408-D26838;TCGA-25-2408-D26839	d85bbcd3-e90c-46cb-ac16-f0e6fb8ce699;39386c00-8aa3-4ae3-9a10-8f09e244de14	Not Available;Not Available	5;5	Not Available;Not Available	61;61	Taxol;Carboplatin	Not Available;Not Available	1;1	06;06	Not Available;Not Available	Not Available;Not Available	ADJUVANT;ADJUVANT	Not Applicable;Not Applicable	Not Available;Not Available	IV;IV	NO;NO	Chemotherapy;Chemotherapy	Not Available;Not Available	Not Available;Not Available	Not Available;Not Available	Not Available;Not Available	2010;2010	Not Available	NOT HISPANIC OR LATINO	TCGA-25-2408-F26837	f82208f0-6255-4dd7-8523-c0c9da6e0800
TCGA-29-1694	FEMALE	1187	Serous Cystadenocarcinoma	Ovary	Dead	Stage IIIC	GX	1			Locoregional Disease	WITH TUMOR		45	Bilateral	TCGA-29-1694	1db60f09-7f5a-4f21-8003-06a6abc781db	2	-16523	1187	0	Discrepancy	TCGA-29-1694-D27198;TCGA-29-1694-D27193;TCGA-29-1694-D27197;TCGA-29-1694-D27199;TCGA-29-1694-D27196;TCGA-29-1694-D27194;TCGA-29-1694-D27201;TCGA-29-1694-D27195;TCGA-29-1694-D27200	07cd68f0-122d-49b4-b143-3c7b65ac8a72;537110ed-8116-4d74-99e4-41d8b322fe29;3a3e5828-1122-4499-bc15-0ce8f44feeb3;81ddb67a-43e6-4641-8513-cf5f881a7693;e0acd0c1-67c5-4fec-9a4e-5fa66cabb881;cc3697a1-5e61-408e-bd54-3f001f19f4c8;3808c300-3209-4949-9587-1d31449fa233;ade1f387-8cb7-4e4d-8868-333460058f40;b5f367a1-a738-4e22-a8a7-2955c3f77f89	Not Available;Not Available;Not Available;Not Available;Not Available;Not Available;Not Available;Not Available;Not Available	5;5;5;5;5;5;5;5;5	1071;161;928;1071;719;161;658;485;1108	969;43;750;1057;658;43;339;241;1101	Gemcitabine;Carboplatin;Doxorubicin HCL Liposomal;Cisplatin;CT2103 Taxane Analog;Paclitaxel;Tamoxifen;Cisplatin;Topotecan	Not Available;Not Available;Not Available;Not Available;Not Available;Not Available;Not Available;Not Available;Not Available	4;4;4;4;4;4;4;4;4	Not Available;Not Available;06;02;04;Not Available;Not Available;06;01	Not Available;Not Available;Not Available;Not Available;Not Available;Not Available;Not Available;Not Available;Not Available	mg;AUC;mg;mg;mg;mg/m2;Not Available;mg/m2;mg	PROGRESSION;ADJUVANT;PROGRESSION;PROGRESSION;PROGRESSION;ADJUVANT;PROGRESSION;PROGRESSION;PROGRESSION	Not Applicable;Not Applicable;Not Applicable;Not Applicable;Not Applicable;Not Applicable;Not Applicable;Not Applicable;Not Applicable	Not Available;Not Available;Not Available;Not Available;Not Available;Not Available;Not Available;Not Available;Not Available	IV;IV;IV;IV;IV;IV;Not Available;IP;IV	NO;NO;NO;NO;NO;NO;NO;NO;NO	Chemotherapy;Chemotherapy;Chemotherapy;Chemotherapy;Chemotherapy;Chemotherapy;Hormone Therapy;Chemotherapy;Chemotherapy	Not Available;Not Available;Not Available;Not Available;Not Available;Not Available;Not Available;Not Available;Not Available	1020;4;56;40;243;150;Not Available;50;4	mg;AUC;mg;mg;mg;mg/m2;Not Available;mg/m2;mg	Not Available;Not Available;Not Available;Not Available;Not Available;Not Available;Not Available;Not Available;Not Available	2010;2010;2010;2010;2010;2010;2010;2010;2010	1	Not Available	TCGA-29-1694-F27192	a17e36f4-a75c-4d56-a8a4-f79d48e9513b
TCGA-23-1029	FEMALE	268	Serous Cystadenocarcinoma	Ovary	Alive	Stage IIIC	G3	0	268			TUMOR FREE		46	Right	TCGA-23-1029	4d71dd15-cd01-4dae-ad70-6dc325140207	2	-16889	Not Applicable	0	268	TCGA-23-1029-D25641;TCGA-23-1029-D25640	5f098756-c714-43d6-b097-9d2dae9f2152;eb833ce3-8f8b-4694-b538-a8d573f473d0	Not Available;Not Available	12;12	78;78	30;30	Paciltaxel;Cisplatin	Not Available;Not Available	8;8	03;03	Not Available;Not Available	mg;mg	ADJUVANT;ADJUVANT	Not Applicable;Not Applicable	Not Available;Not Available	IP;IV;IP;IV	NO;NO	Chemotherapy;Chemotherapy	Not Available;Not Available	1212;375	mg;mg	Not Available;Not Available	2009;2009	Not Available	NOT HISPANIC OR LATINO	TCGA-23-1029-F25639	b21097d0-d714-4e0c-a8b9-fecac7ce4111
TCGA-20-1687	FEMALE	81	Serous Cystadenocarcinoma	Ovary	Alive	Stage IV	G3	0	81			TUMOR FREE		46	Bilateral	TCGA-20-1687	9bf16a89-2fc7-4c08-93bc-3105eec5c3cc	2	-16961	Not Applicable	0	81	TCGA-20-1687-D25564;TCGA-20-1687-D25565	c94c5c61-aaa1-4029-bcb9-34b31ebc25d2;345ae7fa-8baa-4247-bcbb-f86a0ab0aa37	Not Available;Not Available	26;26	172;172	42;42	Taxol;Carboplatin	Not Available;Not Available	10;10	06;06	Not Available;Not Available	Not Available;Not Available	ADJUVANT;ADJUVANT	Not Applicable;Not Applicable	Not Available;Not Available	IV;IV	NO;NO	Chemotherapy;Chemotherapy	Not Available;Not Available	Not Available;Not Available	Not Available;Not Available	Not Available;Not Available	2009;2009	Not Available	NOT HISPANIC OR LATINO	TCGA-20-1687-F25563	f16936bd-4107-4e50-bcd0-da8f76ba03eb
TCGA-13-2065	FEMALE	1993	Serous Cystadenocarcinoma	Ovary	Alive	Stage IIIC	G3	1	946			TUMOR FREE		71	Bilateral	TCGA-13-2065	8d1dcf21-efd3-4fbe-ad44-f43a19239383	2	-25973	Not Applicable	0	266	TCGA-13-2065-D25016;TCGA-13-2065-D25014;TCGA-13-2065-D25015	4cd10442-1ec3-49c9-8ec3-a564919e8276;ec1c37f5-42f6-4a57-b90c-b4ffad895817;9d325c18-026c-4f04-80c4-bf1ce79b67ad	Not Available;Not Available;Not Available	2;2;2	68;141;141	16;89;89	Carboplatin;Carboplatin;Paclitaxel	Not Available;Not Available;Not Available	2;2;2	3;3;3	Not Available;Not Available;Not Available	AUC;AUC;Not Available	ADJUVANT;ADJUVANT;ADJUVANT	Not Applicable;Not Applicable;Not Applicable	Not Available;Not Available;Not Available	IV;IV;IV	NO;NO;NO	Chemotherapy;Chemotherapy;Chemotherapy	Not Available;Not Available;Not Available	5;5;Not Available	AUC;AUC;Not Available	Not Available;Not Available;Not Available	2010;2010;2010	Not Available	Not Available	TCGA-13-2065-F25013;TCGA-13-2065-F72688	85387f59-4a1c-40e5-b5fb-1c151e51ee15;D90678EA-18DA-4C5D-A807-C5ECBCA0B291
TCGA-20-0996	FEMALE	2196	Serous Cystadenocarcinoma	Ovary	Alive	Stage IIIC	G2	0	2196			WITH TUMOR		59	Bilateral	TCGA-20-0996	d7f82e34-5b34-4e8c-a0cf-d7561bcea43c	23	-21572	Not Applicable	0	2196	TCGA-20-0996-D25536;TCGA-20-0996-D25534;TCGA-20-0996-D25537;TCGA-20-0996-D25538;TCGA-20-0996-D25535	e552a4cc-5113-447c-b57b-c5b1e8e7d6e3;8250f16b-1184-4fd2-8fee-602539eab355;dc9650af-ba57-4533-a6e1-a7f3c8462f01;6f44cefa-f2d9-45fb-914f-f4ce34d4ec60;0101cf7f-8bad-467b-a24b-7f0843a67403	Not Available;Not Available;Not Available;Not Available;Not Available	16;16;16;16;16	590;224;1078;Not Available;224	443;168;616;1106;168	Topotecan;Carboplatin;Liposomal Doxorubicin;Etoposide;Taxol	Not Available;Not Available;Not Available;Not Available;Not Available	3;3;3;3;3	15;03;13;06;03	Not Available;Not Available;Not Available;Not Available;Not Available	mg/m2;Not Available;mg/m2;mg;mg/m2	ADJUVANT;ADJUVANT;ADJUVANT;ADJUVANT;ADJUVANT	Not Applicable;Not Applicable;Not Applicable;Not Applicable;Not Applicable	Not Available;Not Available;Not Available;Not Available;Not Available	Not Available;IV;PO;PO;IV	Not Available;Not Available;Not Available;Not Available;Not Available	Chemotherapy;Chemotherapy;Chemotherapy;Chemotherapy;Chemotherapy	Not Available;Not Available;Not Available;Not Available;Not Available	4;Not Available;40;50;175	mg/m2;Not Available;mg/m2;mg;mg/m2	Not Available;Not Available;Not Available;Not Available;Not Available	2009;2009;2009;2009;2009	0	NOT HISPANIC OR LATINO	TCGA-20-0996-F25533	f8e39cd8-ab2c-4f80-9f2c-0991a4e688e4
TCGA-61-1737	FEMALE	1364	Serous Cystadenocarcinoma	Ovary	Alive	Stage IV	G3	0	1364			TUMOR FREE		42	Bilateral	TCGA-61-1737	0aa020cb-69d2-4235-a609-c279a133d8bb	2	-15515	Not Applicable	0	1364	TCGA-61-1737-D28183;TCGA-61-1737-D28185;TCGA-61-1737-D28188;TCGA-61-1737-D28187;TCGA-61-1737-D28184;TCGA-61-1737-D28186	36e353f0-bed3-40a3-affc-66fbe869646f;9a678242-a8a6-4502-b315-c6433876552a;83835e07-7625-4324-9530-b58a5533f592;567b59df-038a-4301-84af-f74ac4ccfccd;bde9b500-2bbc-4635-9b62-37438f743031;593c4bb6-7022-48d5-a8df-50583f549c87	Not Available;Not Available;Not Available;Not Available;Not Available;Not Available	4;4;4;4;4;4	106;176;Not Available;176;106;176	43;127;582;127;43;127	Taxotere;Taxotere;Tamoxifen;Paclitaxel;Carboplatin;Cisplatin	Not Available;Not Available;Not Available;Not Available;Not Available;Not Available	12;12;12;12;12;12	04;03;Not Available;03;04;03	Not Available;Not Available;Not Available;Not Available;Not Available;Not Available	mg;mg;mg/day;mg;mg;mg	ADJUVANT;ADJUVANT;ADJUVANT;ADJUVANT;ADJUVANT;ADJUVANT	Not Applicable;Not Applicable;Not Applicable;Not Applicable;Not Applicable;Not Applicable	Not Available;Not Available;Not Available;Not Available;Not Available;Not Available	IV;IP;IV;Not Available;IV;IV;IP;IV	NO;NO;YES;NO;NO;NO	Chemotherapy;Chemotherapy;Hormone Therapy;Chemotherapy;Chemotherapy;Chemotherapy	Not Available;Not Available;Not Available;Not Available;Not Available;Not Available	480;270;19000;198;2600;372	mg;mg;mg/day;mg;mg;mg	Not Available;Not Available;Not Available;Not Available;Not Available;Not Available	2009;2009;2009;2009;2009;2009	Not Available	NOT HISPANIC OR LATINO	TCGA-61-1737-F28182	36c9e79e-9559-4eb1-bc79-7274be460b42
TCGA-09-0365	FEMALE	288	Serous Cystadenocarcinoma	Ovary	Dead	Stage IIIC	G3	1	251		Recurrence	WITH TUMOR		70	Left	TCGA-09-0365	7621ed77-98bc-4b4e-8011-e18fcd014071	4	-25703	288	0	Not Available	TCGA-09-0365-D24204;TCGA-09-0365-D24205	c742fa3b-01b4-42d8-94a9-f5909f22b5d9;8c488ff2-8e08-47d4-ab18-b271a8d00717	Not Available;Not Available	27;27	70;70	46;15	carboplatin;taxol	Not Available;Not Available	3;3	3;3	Not Available;Not Available	mg;mg/m2	ADJUVANT;ADJUVANT	Not Applicable;Not Applicable	Not Available;Not Available	IV;IV	NO;NO	Chemotherapy;Chemotherapy	Not Available;Not Available	273;175	mg;mg/m2	Not Available;Not Available	2009;2009	Not Available	NOT HISPANIC OR LATINO	TCGA-09-0365-F24203	d6b85df6-097b-473c-b7bf-794e3fda6850
TCGA-36-1575	FEMALE	260	Serous Cystadenocarcinoma	Ovary	Alive	Stage IIIB	G3	0	260			TUMOR FREE		83	Not Available	TCGA-36-1575	6ea9877f-eb8d-4ee9-af4c-32a78474d9a6	2	-30592	Not Applicable	0	260																								Not Available	Not Available	TCGA-36-1575-F27872	a467ed8b-fffc-416c-baec-1a137a98d03b
TCGA-13-0791	FEMALE	1224	Serous Cystadenocarcinoma	Ovary	Dead	Stage IIIC	G3	1	281		Recurrence	WITH TUMOR		58	Bilateral	TCGA-13-0791	90118207-8f11-4784-ac1b-0deec2e7af3a	24	-21380	Not Applicable	0	1184	TCGA-13-0791-D24581;TCGA-13-0791-D24580;TCGA-13-0791-D24582;TCGA-13-0791-D24585;TCGA-13-0791-D24586;TCGA-13-0791-D24583;TCGA-13-0791-D24584	4bbea2bf-9e76-4eb8-943a-c8261c1e3d4b;710705ec-cf9c-48b3-ba3e-231fd550abdc;379ea08d-75c7-4d5b-98f6-81fab2e749e8;75a48310-4c7b-4d7e-aeba-64a599ee42e4;ae155608-caaf-401f-9b84-046e87854d2c;0e93df1a-7811-43d7-ad40-d83f7e680672;ad968ce1-3353-45e4-a7c6-d061d40f6126	Not Available;Not Available;Not Available;Not Available;Not Available;Not Available;Not Available	16;16;16;8;8;8;8	141;141;281;780;829;449;640	36;36;213;654;794;302;479	Paclitaxel;Carboplatin;Paclitaxel;Gemcitabine;Carboplatin;Liposomal Doxorubicin;Topotecan	Not Available;Not Available;Not Available;Not Available;Not Available;Not Available;Not Available	4;4;4;3;3;3;3	6;6;4;12;2;6;19	Not Available;Not Available;Not Available;800;Not Available;40;3	mg/m2;Not Available;mg/m2;mg/m2;AUC;mg/m2;mg/m2	ADJUVANT;ADJUVANT;ADJUVANT;RECURRENCE;RECURRENCE;RECURRENCE;RECURRENCE	Not Applicable;Not Applicable;Not Applicable;Not Applicable;Not Applicable;Not Applicable;Not Applicable	Not Available;Not Available;Not Available;Not Available;Not Available;Not Available;Not Available	IV;IV;IV;IV;IV;IV;IV	Not Available;Not Available;Not Available;NO;NO;NO;NO	Chemotherapy;Chemotherapy;Chemotherapy;Chemotherapy;Chemotherapy;Chemotherapy;Chemotherapy	Not Available;Not Available;Not Available;Not Available;Not Available;Not Available;Not Available	175;Not Available;135;Not Available;4;Not Available;Not Available	mg/m2;Not Available;mg/m2;mg/m2;AUC;mg/m2;mg/m2	Not Available;Not Available;Not Available;Not Available;Not Available;Not Available;Not Available	2009;2009;2009;2010;2010;2010;2010	Not Available	NOT HISPANIC OR LATINO	TCGA-13-0791-F24579;TCGA-13-0791-F72604	93d82464-ef0e-4d3e-b324-86b1b2e7b05c;F17EB102-471B-4D9A-8283-118007CC21E9
TCGA-13-1505	FEMALE	1998	Serous Cystadenocarcinoma	Ovary	Alive	Stage IIIC	G3	1	1561			TUMOR FREE		63	Bilateral	TCGA-13-1505	914f84bf-578b-4f4d-93cb-378228ea58f6	31	-23238	Not Applicable	0	128	TCGA-13-1505-D24940;TCGA-13-1505-D24942;TCGA-13-1505-D24941	ca2b331b-320f-43b9-a347-0998e1b4469f;94940689-a0b6-4a75-8b62-bf52715197cd;6e83f0a3-d305-449d-82f6-7ded7579a9e0	Not Available;Not Available;Not Available	1;1;1	167;167;167	27;27;27	Cisplatin;Paclitaxel;Paclitaxel	Not Available;Not Available;Not Available	2;2;2	6;6;6	Not Available;Not Available;Not Available	Not Available;Not Available;Not Available	ADJUVANT;ADJUVANT;ADJUVANT	Not Applicable;Not Applicable;Not Applicable	Not Available;Not Available;Not Available	IP;IV;IP	NO;NO;NO	Chemotherapy;Chemotherapy;Chemotherapy	Not Available;Not Available;Not Available	Not Available;Not Available;Not Available	Not Available;Not Available;Not Available	Not Available;Not Available;Not Available	2010;2010;2010	Not Available	NOT HISPANIC OR LATINO	TCGA-13-1505-F24939;TCGA-13-1505-F72674	e5c8ba1b-3e68-4637-acf7-695582f4474b;6C29C067-34ED-4365-8FC9-CE3BB34BC94C
TCGA-04-1519	FEMALE	24	Serous Cystadenocarcinoma	Ovary	Alive	Stage IIIC	G3	0	24			Not Available		48	Not Available	TCGA-04-1519	e9b5336e-d724-4e7d-8c81-1147abd0a80d	3	-17671	Not Applicable	0	Not Available																								Not Available	Not Available	TCGA-04-1519-F58470	8553B172-7AE7-4A72-8769-5EC3B9F4B20D
TCGA-25-1326	FEMALE	1249	Serous Cystadenocarcinoma	Ovary	Dead	Stage IIIC	G3	1	396		Recurrence	WITH TUMOR		61	Bilateral	TCGA-25-1326	07a859fc-6f78-4905-9035-90e2403dbe8d	27	-22339	1249	0	945	TCGA-25-1326-D26694;TCGA-25-1326-D26695;TCGA-25-1326-D26693;TCGA-25-1326-D26696;TCGA-25-1326-D26692	58e93434-8106-4fde-8237-8f06debfac04;c162c533-1b7a-47a4-9eef-32d33fbd1c44;793c8970-8384-4df9-a64a-7f0044bb4524;e9376983-d8c4-4462-94bd-b2bdfe55ab02;135291be-0cf9-4eff-a32f-e251268a5f6b	Not Available;Not Available;Not Available;Not Available;Not Available	27;27;27;27;27	153;153;153;518;153	31;31;31;396;31	Taxol;Taxol;Carbo;Doxil;Topetecan	Not Available;Not Available;Not Available;Not Available;Not Available	3;3;3;3;3	8;8;8;Not Available;8	Not Available;Not Available;Not Available;Not Available;Not Available	Not Available;Not Available;Not Available;Not Available;Not Available	ADJUVANT;ADJUVANT;ADJUVANT;PROGRESSION;ADJUVANT	Not Applicable;Not Applicable;Not Applicable;Not Applicable;Not Applicable	Not Available;Not Available;Not Available;Not Available;Not Available	IV;IV;IV;IV;IV	Not Available;Not Available;Not Available;Not Available;NO	Chemotherapy;Chemotherapy;Chemotherapy;Chemotherapy;Chemotherapy	Not Available;Not Available;Not Available;Not Available;Not Available	Not Available;Not Available;Not Available;Not Available;Not Available	Not Available;Not Available;Not Available;Not Available;Not Available	Not Available;Not Available;Not Available;Not Available;Not Available	2009;2009;2009;2009;2009	Not Available	NOT HISPANIC OR LATINO	TCGA-25-1326-F26691	7a9ac328-f776-41a3-9f99-0fa250c41f24
TCGA-57-1583	FEMALE	346	Serous Cystadenocarcinoma	Ovary	Dead	Stage IIIC	G3	0	346			WITH TUMOR		57	Left	TCGA-57-1583	76cc2d21-eebc-4f09-9bc7-dbf7af0aafa8	2	-21167	346	0	346	TCGA-57-1583-D28069;TCGA-57-1583-D28070	fcaf527f-ac45-49ba-b12e-0898f26aa9fe;434279a5-98f5-4980-865b-49ce6f7f5e16	Not Available;Not Available	28;28	Not Available;Not Available	37;37	Carboplatin;Taxol	Not Available;Not Available	7;7	Not Available;Not Available	Not Available;Not Available	Not Available;Not Available	ADJUVANT;ADJUVANT	Not Applicable;Not Applicable	Not Available;Not Available	IV;IV	YES;NO	Chemotherapy;Chemotherapy	Not Available;Not Available	Not Available;Not Available	Not Available;Not Available	Not Available;Not Available	2009;2009	Not Available	Not Available	TCGA-57-1583-F28068	226da9f5-f0ba-4f11-9c5e-1e1c53456ce7
TCGA-09-2048	FEMALE	138	Serous Cystadenocarcinoma	Ovary	Dead	Stage IIIC	G3	0	138			WITH TUMOR		63	Bilateral	TCGA-09-2048	184aac07-44c1-47f1-8adf-50acbcc1762c	3	-23043	138	0	Not Available	TCGA-09-2048-D24352	36759fad-df49-4c76-9c80-ccbd66d8d40a	Not Available	3	Not Available	60	Not Available	Not Available	11	Not Available	Not Available	Not Available	ADJUVANT	Not Applicable	Not Available	Not Available	NO	Chemotherapy	Not Available	Not Available	Not Available	Not Available	2009	Not Available	NOT HISPANIC OR LATINO	TCGA-09-2048-F24351	7d525bd5-fc5d-4c60-aff2-5dbece847b51
TCGA-42-2593	FEMALE	45	Serous Cystadenocarcinoma	Ovary	Dead	Stage IIIC	G3	0	45			WITH TUMOR		67	Bilateral	TCGA-42-2593	3db7ecdd-315f-4475-a375-f6044a4b0070	19	-24823	45	0	Not Available																								4	NOT HISPANIC OR LATINO	TCGA-42-2593-F39341	56EC3E81-18F8-4A94-8F7A-B5CCD891144C
TCGA-30-1859	FEMALE	1463	Serous Cystadenocarcinoma	Ovary	Dead		G3	1			Locoregional Disease	WITH TUMOR		56	Bilateral	TCGA-30-1859	dac8d825-dd47-47ed-a426-0ee75feb76f3	2	-20498	1463	0	1463	TCGA-30-1859-D27575;TCGA-30-1859-D27572;TCGA-30-1859-D27574;TCGA-30-1859-D27569;TCGA-30-1859-D27576;TCGA-30-1859-D27568;TCGA-30-1859-D27571;TCGA-30-1859-D27567;TCGA-30-1859-D27570;TCGA-30-1859-D27573;TCGA-30-1859-D27577;TCGA-30-1859-D27578	93b2bc44-d1e0-47f3-9e5b-acbef8b3a702;adb0eafc-52e6-4a08-9a54-550b06ff59ef;2fe73c42-528a-49b7-8ace-300e3463ab5b;d9e87488-f292-4809-82e9-b9d72576d084;bb4f183e-5f3e-46f4-9694-2a4f046344e2;39b99982-93f4-4457-a0fe-8336aafbe6dd;afacbc4a-1d91-481a-9356-4e49172e7a00;2994f82f-4e05-4b8d-b9ca-755057a83d52;1c7d824c-50bd-44c9-8d9b-885a9264aaf6;c6e94b43-b6ed-43ef-b8bb-65ed70ca8fb9;d9868c5b-53d0-4d6b-8ac2-95b76…	Not Available;Not Available;Not Available;Not Available;Not Available;Not Available;Not Available;Not Available;Not Available;Not Available;Not Available;Not Available	21;21;21;21;21;21;21;21;21;21;21;27	1376;593;1197;199;1379;199;199;199;199;1103;1166;1131	1214;369;1162;31;1334;31;31;31;31;982;1135;1104	Taxol;Trabectedin;Doxil;Carboplatin;Cytoxan;Gemcitabine;Topotecan;Taxol;Adriamycin;Carboplatin;Armidex;Sargramostin	Not Available;Not Available;Not Available;Not Available;Not Available;Not Available;Not Available;Not Available;Not Available;Not Available;Not Available;Not Available	12;12;12;12;12;12;12;12;12;12;12;1	Not Available;08;02;09;Not Available;09;09;09;09;05;Not Available;Not Available	Not Available;Not Available;Not Available;Not Available;Not Available;Not Available;Not Available;Not Available;Not Available;Not Available;Not Available;Not Available	mg/m2;mg/m2;mg/m2;AUC;Not Available;mg/m2;mg/m2;mg/m2;mg/m2;AUC;Not Available;Not Available	PROGRESSION;PROGRESSION;PROGRESSION;ADJUVANT;PROGRESSION;ADJUVANT;ADJUVANT;ADJUVANT;ADJUVANT;PROGRESSION;PROGRESSION;PROGRESSION	Not Applicable;Not Applicable;Not Applicable;Not Applicable;Not Applicable;Not Applicable;Not Applicable;Not Applicable;Not Applicable;Not Applicable;Not Applicable;Not Applicable	Not Available;Not Available;Not Available;Not Available;Not Available;Not Available;Not Available;Not Available;Not Available;Not Available;Not Available;Not Available	IV;IV;IV;IV;PO;IV;IV;IV;IV;IV;Not Available;IV	NO;NO;NO;NO;NO;NO;NO;NO;NO;NO;NO;NO	Chemotherapy;Chemotherapy;Chemotherapy;Chemotherapy;Chemotherapy;Chemotherapy;Chemotherapy;Chemotherapy;Chemotherapy;Chemotherapy;Hormone Therapy;Immunotherapy	Not Available;Not Available;Not Available;Not Available;Not Available;Not Available;Not Available;Not Available;Not Available;Not Available;Not Available;Not Available	80;500;40;5;Not Available;1000;1.25;175;25;5;Not Available;Not Available	mg/m2;mg/m2;mg/m2;AUC;Not Available;mg/m2;mg/m2;mg/m2;mg/m2;AUC;Not Available;Not Available	Not Available;Not Available;Not Available;Not Available;Not Available;Not Available;Not Available;Not Available;Not Available;Not Available;Not Available;Not Available	2009;2009;2009;2009;2009;2009;2009;2009;2009;2009;2009;2010	0	NOT HISPANIC OR LATINO	TCGA-30-1859-F27566	653cdd67-0520-483f-9dcd-db752961bc6e
TCGA-13-0717	FEMALE	748	Serous Cystadenocarcinoma	Ovary	Dead	Stage IIIC	G3	1	294		Recurrence	WITH TUMOR		54	Bilateral	TCGA-13-0717	3867e193-c82f-4693-9b32-bac76b5f4d06	24	-20042	748	0	748	TCGA-13-0717-D24495;TCGA-13-0717-D24496	01973948-9206-4968-b05a-8b19e465ef65;3a6a17e8-3079-4667-be37-f8a1adc186e1	Not Available;Not Available	15;15	182;182	9;9	Carboplatin;Paclitaxel	Not Available;Not Available	4;4	8;8	Not Available;Not Available	Not Available;mg/m2	ADJUVANT;ADJUVANT	Not Applicable;Not Applicable	Not Available;Not Available	IV;IV	NO;NO	Chemotherapy;Chemotherapy	Not Available;Not Available	5;175	Not Available;mg/m2	Not Available;Not Available	2009;2009	Not Available	NOT HISPANIC OR LATINO	TCGA-13-0717-F24494	e6fab168-c489-442f-82ab-85ef871f703d
TCGA-24-2261	FEMALE	24	Serous Cystadenocarcinoma	Ovary	Dead	Stage IIIC	G3	0	24			WITH TUMOR		76	Left	TCGA-24-2261	eec69ea9-ceb8-456a-aff4-41fb8a261e36	15	-27897	24	0	24																								Not Available	Not Available	TCGA-24-2261-F26540	d38e75d8-914a-44fe-8f84-904c95b9a680
TCGA-29-1778	FEMALE	454	Serous Cystadenocarcinoma	Ovary	Alive	Stage IIIC	G3	0	454			TUMOR FREE		77	Right	TCGA-29-1778	44e840c9-ea54-4dba-9b2a-264ef1f2c304	2	-28147	Not Applicable	0	454	TCGA-29-1778-D27423;TCGA-29-1778-D27421;TCGA-29-1778-D27424;TCGA-29-1778-D27425;TCGA-29-1778-D27422	af76c927-da93-45aa-a1f7-96a6182eaa7a;76ba3141-d32e-463c-a900-bae906b194f2;1622a274-30ac-42b7-b84f-9a475d6681f6;fef2287b-ade4-4f49-808f-23aac02719c6;7b208018-f74b-4c65-ae60-865ca874ba40	Not Available;Not Available;Not Available;Not Available;Not Available	26;26;26;26;26	80;125;80;80;125	17;101;17;17;101	Paclitaxel;Docetaxel;Paclitaxel;Carboplatin;Carboplatin	Not Available;Not Available;Not Available;Not Available;Not Available	10;10;10;10;10	04;02;04;04;02	Not Available;Not Available;Not Available;Not Available;Not Available	mg;mg;mg;mg;mg	ADJUVANT;ADJUVANT;ADJUVANT;ADJUVANT;ADJUVANT	Not Applicable;Not Applicable;Not Applicable;Not Applicable;Not Applicable	Not Available;Not Available;Not Available;Not Available;Not Available	IV;IV;IV;IV;IV	NO;NO;NO;NO;NO	Chemotherapy;Chemotherapy;Chemotherapy;Chemotherapy;Chemotherapy	Not Available;Not Available;Not Available;Not Available;Not Available	325;110;325;500;410	mg;mg;mg;mg;mg	Not Available;Not Available;Not Available;Not Available;Not Available	2009;2009;2009;2009;2009	Not Available	Not Available	TCGA-29-1778-F27420	04e3ce5f-feff-436c-82c2-ccf22cdc34ff
TCGA-13-1496	FEMALE	129	Serous Cystadenocarcinoma	Ovary	Dead	Stage IIIC	G3	0	129			Not Available		65	Bilateral	TCGA-13-1496	e5a329ec-e50e-4786-901d-b58474f8ea65	31	-23993	129	0	129	TCGA-13-1496-D24905;TCGA-13-1496-D24906	42c8232f-dc83-4025-a957-1c121f960780;b3f86e9e-52c6-40f6-88cf-521bae342105	Not Available;Not Available	29;29	33;33	33;33	Carboplatin;Paclitaxel	Not Available;Not Available	6;6	1;1	Not Available;Not Available	Not Available;mg/m2	ADJUVANT;ADJUVANT	Not Applicable;Not Applicable	Not Available;Not Available	IV;IV	NO;NO	Chemotherapy;Chemotherapy	Not Available;Not Available	6;175	Not Available;mg/m2	Not Available;Not Available	2009;2009	Not Available	NOT HISPANIC OR LATINO	TCGA-13-1496-F24904	8df03585-7754-4f4b-a868-bfb88530f053
TCGA-61-1725	FEMALE	956	Serous Cystadenocarcinoma	Ovary	Alive	Stage IIIC	G3	1	844		Recurrence	WITH TUMOR		40	Bilateral	TCGA-61-1725	a6eb0cd0-fe57-41b0-8593-776208684293	2	-14782	Not Applicable	0	956	TCGA-61-1725-D28144;TCGA-61-1725-D28145;TCGA-61-1725-D28146;TCGA-61-1725-D28148;TCGA-61-1725-D28149;TCGA-61-1725-D28150;TCGA-61-1725-D28147	ff470391-4fb2-4ee9-b99a-db1ca43e94df;de6d03ff-d938-406d-934b-3b682ca22abc;f8dca13c-4cb2-443d-852d-5f8c0ef3f597;ae6635ba-24c7-4ef6-9109-fcb345f40100;e3c3aa0d-b3cf-4832-a3b3-7edb59254a73;0b003971-e65d-4cad-886b-054a4cb03a53;be9ce53c-8440-43ce-9790-f43f463a4749	Not Available;Not Available;Not Available;Not Available;Not Available;Not Available;Not Available	4;4;4;4;4;4;4	158;158;158;Not Available;Not Available;Not Available;577	45;45;45;908;908;908;235	Taxol;Cisplatin;Taxol;Avastin;Carboplatin;Gamzar;Taxol	Not Available;Not Available;Not Available;Not Available;Not Available;Not Available;Not Available	12;12;12;12;12;12;12	06;06;06;06;06;06;12	Not Available;Not Available;Not Available;Not Available;Not Available;Not Available;Not Available	mg;mg;mg;mg;mg;mg;mg	ADJUVANT;ADJUVANT;ADJUVANT;RECURRENCE;RECURRENCE;RECURRENCE;ADJUVANT	Not Applicable;Not Applicable;Not Applicable;Not Applicable;Not Applicable;Not Applicable;Not Applicable	Not Available;Not Available;Not Available;Not Available;Not Available;Not Available;Not Available	IP;IV;IP;IV;IP;IV;IV;IV;IV;IV	NO;NO;NO;YES;YES;YES;NO	Chemotherapy;Chemotherapy;Chemotherapy;Chemotherapy;Chemotherapy;Chemotherapy;Chemotherapy	Not Available;Not Available;Not Available;Not Available;Not Available;Not Available;Not Available	1548;585;456;8550;4368;2400;3204	mg;mg;mg;mg;mg;mg;mg	Not Available;Not Available;Not Available;Not Available;Not Available;Not Available;Not Available	2009;2009;2009;2009;2009;2009;2009	Not Available	NOT HISPANIC OR LATINO	TCGA-61-1725-F28143	4795b469-2ea1-4e65-bb8f-5b401b6632d5
TCGA-23-1028	FEMALE	1503	Serous Cystadenocarcinoma	Ovary	Alive	Stage IIIC	G3	1	133		Recurrence	WITH TUMOR		43	Left	TCGA-23-1028	df53c3c0-3605-4d2b-bdc7-96d9beab27ea	23	-16018	Not Applicable	0	1503	TCGA-23-1028-D25627;TCGA-23-1028-D25629;TCGA-23-1028-D25628;TCGA-23-1028-D25631;TCGA-23-1028-D25637;TCGA-23-1028-D25634;TCGA-23-1028-D25626;TCGA-23-1028-D25636;TCGA-23-1028-D25635;TCGA-23-1028-D25630;TCGA-23-1028-D25632;TCGA-23-1028-D25625;TCGA-23-1028-D25633	850beb81-2d13-437e-ae2a-8d4377df3ef9;b09d45b1-238e-42ff-be29-a0aa4024010a;04a1186c-fbac-46cc-9511-f3410889dfca;987f46e8-6c27-4d5a-b765-c5125640486e;7f691d4d-5047-4632-9a47-8b0354586a4e;02d68082-acf3-4467-b42a-da9e8cd5c130;7891f1ae-b0a9-448d-b9c0-c4f15de2e582;be0eed66-9759-46f5-861d-85d2b3c7dcd4;f26754f2-8f61-4593-9928-59d785330f4e;266bdf06-86e9-4dde-a5f7-5f96cc3c6eca;b5320a45-929d-4b52-b0d4-d3a67…	Not Available;Not Available;Not Available;Not Available;Not Available;Not Available;Not Available;Not Available;Not Available;Not Available;Not Available;Not Available;Not Available	27;27;27;27;27;27;27;27;27;27;27;27;27	229;859;859;1335;1489;1461;110;1489;1461;1006;1153;110;1461	173;749;749;1112;1468;1461;26;1468;1461;908;1140;26;1363	Doxorubicin;Docetaxel;Carboplatin;Doxorubicin;Cisplatin;Gemcitabine;Carboplatin;Gemcitabine;Carboplatin;Topotecan;Topotecan;Paclitaxel;Carboplatin	Not Available;Not Available;Not Available;Not Available;Not Available;Not Available;Not Available;Not Available;Not Available;Not Available;Not Available;Not Available;Not Available	3;3;3;3;3;3;3;3;3;3;3;3;3	3;6;6;8;2;1;4;2;1;11;3;4;5	Not Available;Not Available;Not Available;Not Available;Not Available;Not Available;Not Available;Not Available;Not Available;Not Available;Not Available;Not Available;Not Available	mg;mg;mg;mg;mg;mg;mg;mg;mg;mg;mg;mg;mg	RECURRENCE;RECURRENCE;RECURRENCE;PROGRESSION;PROGRESSION;PROGRESSION;ADJUVANT;PROGRESSION;PROGRESSION;PROGRESSION;PROGRESSION;ADJUVANT;PROGRESSION	Not Applicable;Not Applicable;Not Applicable;Not Applicable;Not Applicable;Not Applicable;Not Applicable;Not Applicable;Not Applicable;Not Applicable;Not Applicable;Not Applicable;Not Applicable	Not Available;Not Available;Not Available;Not Available;Not Available;Not Available;Not Available;Not Available;Not Available;Not Available;Not Available;Not Available;Not Available	IV;IV;IV;IV;IV;IV;IV;IV;IV;IV;IV;IV;IV	NO;NO;NO;NO;NO;NO;NO;NO;NO;NO;NO;NO;NO	Chemotherapy;Chemotherapy;Chemotherapy;Chemotherapy;Chemotherapy;Chemotherapy;Chemotherapy;Chemotherapy;Chemotherapy;Chemotherapy;Chemotherapy;Chemotherapy;Chemotherapy	Not Available;Not Available;Not Available;Not Available;Not Available;Not Available;Not Available;Not Available;Not Available;Not Available;Not Available;Not Available;Not Available	201;846;2802;417.5;100;1552;2900;3100;525;40.89;10.3;1600;2667	mg;mg;mg;mg;mg;mg;mg;mg;mg;mg;mg;mg;mg	Not Available;Not Available;Not Available;Not Available;Not Available;Not Available;Not Available;Not Available;Not Available;Not Available;Not Available;Not Available;Not Available	2009;2009;2009;2009;2009;2009;2009;2009;2009;2009;2009;2009;2009	Not Available	HISPANIC OR LATINO	TCGA-23-1028-F25624	775ea41c-8d7e-4dd1-af91-41ee25e480d1
TCGA-23-2072	FEMALE	759	Serous Cystadenocarcinoma	Ovary	Dead	Stage IV	G3	1	476		Recurrence	WITH TUMOR		58	Right	TCGA-23-2072	1592af8e-8d11-4325-8a2b-e0c690b15b58	18	-21523	759	0	Not Available	TCGA-23-2072-D25761;TCGA-23-2072-D25759;TCGA-23-2072-D25760;TCGA-23-2072-D25758	ac71f616-6349-4cdd-aee1-9e7df89acd4a;7fde5afb-c211-4558-a45f-0bfc5aeb3791;f58539f9-5158-4d42-8b4c-701c651a0c41;0eb5afce-60e8-4797-9672-a84ced84dbdb	Not Available;Not Available;Not Available;Not Available	18;18;18;18	571;151;620;151	571;26;579;26	Doxil;Taxol;Gemzar;Carboplatin	Not Available;Not Available;Not Available;Not Available	11;11;11;11	01;07;04;07	Not Available;Not Available;Not Available;Not Available	mg;mg;mg;mg	PROGRESSION;ADJUVANT;PROGRESSION;ADJUVANT	Not Applicable;Not Applicable;Not Applicable;Not Applicable	Not Available;Not Available;Not Available;Not Available	IV;IV;IV;IV	NO;NO;NO;NO	Chemotherapy;Chemotherapy;Chemotherapy;Chemotherapy	Not Available;Not Available;Not Available;Not Available	64;1890;6280;3325	mg;mg;mg;mg	Not Available;Not Available;Not Available;Not Available	2009;2009;2009;2009	Not Available	NOT HISPANIC OR LATINO	TCGA-23-2072-F25757	3bba6ccf-5cb0-46d4-b223-f5e07789ada6
TCGA-36-1571	FEMALE	695	Serous Cystadenocarcinoma	Ovary	Dead	Stage IIIB	G3	1	375		Recurrence	WITH TUMOR		53	Bilateral	TCGA-36-1571	12581634-eebb-4841-8498-71dc9d78c546	2	-19608	695	0	695	TCGA-36-1571-D27864;TCGA-36-1571-D27865;TCGA-36-1571-D27863;TCGA-36-1571-D27866	1478fbc5-996d-422f-b992-85c1bdc1d14d;6c4703e2-a040-46b1-8900-b41aa4c1e515;5e7ee568-9720-4fc7-aa9a-93f967ae30bc;6ad7f24d-3255-4eb0-abb2-2de5df56d30e	Not Available;Not Available;Not Available;Not Available	15;15;15;15	173;531;173;531	32;384;32;384	Paclitaxel;Carboplatin;Carboplatin;Gemcitabine	Not Available;Not Available;Not Available;Not Available	1;1;1;1	06;08;06;08	Not Available;Not Available;Not Available;Not Available	mg;mg;mg;mg	ADJUVANT;RECURRENCE;ADJUVANT;RECURRENCE	Not Applicable;Not Applicable;Not Applicable;Not Applicable	Not Available;Not Available;Not Available;Not Available	IV;IV;IV;IV	NO;NO;NO;NO	Chemotherapy;Chemotherapy;Chemotherapy;Chemotherapy	Not Available;Not Available;Not Available;Not Available	2100;4920;5130;26752	mg;mg;mg;mg	Not Available;Not Available;Not Available;Not Available	2010;2010;2010;2010	Not Available	Not Available	TCGA-36-1571-F27862	00574d51-b04f-42c8-ba1a-f4d8af2e4ebd
TCGA-29-1761	FEMALE	528	Serous Cystadenocarcinoma	Ovary	Dead	Stage IIIC	G3	0	528			WITH TUMOR		80	Bilateral	TCGA-29-1761	374ea8df-ecc4-44b0-b519-33efa5078018	2	-29337	528	0	517	TCGA-29-1761-D27313;TCGA-29-1761-D27314	fe321eac-53ee-44e1-a7b6-8047473fcbf2;c8045157-0494-4ff3-81f0-5ad85149afb6	Not Available;Not Available	18;30	202;202	49;Not Available	Carboplatin;Paclitaxel	Not Available;Not Available	11;11	03;03	Not Available;Not Available	Not Available;Not Available	ADJUVANT;ADJUVANT	Not Applicable;Not Applicable	Not Available;Not Available	IV;IV	NO;NO	Chemotherapy;Chemotherapy	Not Available;Not Available	Not Available;Not Available	Not Available;Not Available	Not Available;Not Available	2009;2009	Not Available	Not Available	TCGA-29-1761-F27312	d8897df7-fd26-4fd4-b696-00efd70cb5fc
TCGA-23-2649	FEMALE	116	Serous Cystadenocarcinoma	Ovary	Alive	Stage IIIC	G3	0	116			Not Available		60	Left	TCGA-23-2649	ae5fa7cb-1984-423f-aa88-571314860943	9	-22210	Not Applicable	0	116																								Not Available	NOT HISPANIC OR LATINO	TCGA-23-2649-F25822	62d9fa88-d505-4cf2-b3f5-6512e940dba6
TCGA-57-1584	FEMALE	643	Serous Cystadenocarcinoma	Ovary	Alive	Stage IIIC	G3	1	530		Recurrence	WITH TUMOR		47	Bilateral	TCGA-57-1584	ed21615c-0de3-421c-9e8d-8996026c4431	2	-17263	Not Applicable	0	643	TCGA-57-1584-D28073;TCGA-57-1584-D28074	0c8bcfba-47b8-4021-9897-453225bb8218;ebf8762c-60c4-480c-b622-f381bd0c690b	Not Available;Not Available	28;28	Not Available;Not Available	573;573	Taxol;Carboplatin	Not Available;Not Available	7;7	Not Available;Not Available	Not Available;Not Available	mg/m2;Not Available	RECURRENCE;RECURRENCE	Not Applicable;Not Applicable	Not Available;Not Available	IV;IV	YES;YES	Chemotherapy;Chemotherapy	Not Available;Not Available	175;6	mg/m2;Not Available	Not Available;Not Available	2009;2009	0	NOT HISPANIC OR LATINO	TCGA-57-1584-F28072	aca7dfdd-2755-43e1-a775-1687dee80c72
TCGA-42-2589	FEMALE	1278	Serous Cystadenocarcinoma	Ovary	Alive	Stage IIIC	G3	1	364		Recurrence	TUMOR FREE		54	Bilateral	TCGA-42-2589	dfb7dc5d-92f4-4a3a-9667-db38efcc9fdb	3	-19852	Not Applicable	0	230	TCGA-42-2589-D28046;TCGA-42-2589-D28048;TCGA-42-2589-D28047;TCGA-42-2589-D28802;TCGA-42-2589-D28805	811bc53a-f05b-4779-a676-128d0da2822a;6a1466ac-1f06-4617-a34e-604e6945dac0;1a6c0376-6bc1-4d52-ad00-2a5d128b8232;F4DC11FC-B77B-4047-A7F3-0C9AC3E36A26;180D0212-9DF5-42F7-928C-EB0455BB8FAE	Not Available;Not Available;Not Available;Not Available;Not Available	3;3;3;11;9	132;126;41;504;644	21;63;21;377;377	Taxol;Cisplatin;Carboplatin;Carboplatin;Gemcitabine	Not Available;Not Available;Not Available;Not Available;Not Available	6;6;6;5;6	06;4;2;06;11	308;140;696;475;1038-1400	mg;mg;mg;mg;mg	ADJUVANT;ADJUVANT;ADJUVANT;RECURRENCE;RECURRENCE	Not Applicable;Not Applicable;Not Applicable;Not Applicable;Not Applicable	Not Available;Not Available;Not Available;02;02	IP;IV;IP;IV;IV;IV;IV	NO;NO;NO;NO;NO	Chemotherapy;Chemotherapy;Chemotherapy;Chemotherapy;Chemotherapy	Not Available;Not Available;Not Available;Not Available;Not Available	2046;545;1392;2375;21398	mg;mg;mg;mg;mg	Not Available;Not Available;Not Available;Not Available;Not Available	2010;2010;2010;2011;2011	Not Available	NOT HISPANIC OR LATINO	TCGA-42-2589-F28045;TCGA-42-2589-F28800;TCGA-42-2589-F39385;TCGA-42-2589-F41366	99416484-a8e7-4141-8120-c9be36ef04db;76D3B479-1411-4678-AE45-EB690D33A1A5;45F7924C-D860-471C-8589-A438DDF08BD9;0BD8D506-45AC-46FD-B54C-7FEC74EE4880
TCGA-13-2057	FEMALE	2434	Serous Cystadenocarcinoma	Ovary	Alive	Stage IIIC	G3	1	897			TUMOR FREE		59	Bilateral	TCGA-13-2057	56c4bd48-ab15-4b49-ae2f-968653052b50	1	-21554	Not Applicable	0	433	TCGA-13-2057-D24991;TCGA-13-2057-D24990	37eff60b-6903-445a-b8ed-588e9df2f112;413048b1-1b7c-4cb7-a8f3-47cc291c18a9	Not Available;Not Available	1;1	159;159	51;51	Paclitaxel;Carboplatin	Not Available;Not Available	2;2	6;6	Not Available;Not Available	mg/m2;AUC	ADJUVANT;ADJUVANT	Not Applicable;Not Applicable	Not Available;Not Available	IV;IV	NO;NO	Chemotherapy;Chemotherapy	Not Available;Not Available	Not Available;5	mg/m2;AUC	Not Available;Not Available	2010;2010	Not Available	Not Available	TCGA-13-2057-F24989;TCGA-13-2057-F72682	23aa1dcb-47f5-4846-9390-de68cc075309;445565CB-8EF6-45C8-8574-37927DD06D6E
TCGA-23-1026	FEMALE	816	Serous Cystadenocarcinoma	Ovary	Alive	Stage IIIC	G3	1	797		Recurrence	WITH TUMOR		45	Left	TCGA-23-1026	c6ede8ae-881c-47a0-a0ef-745ed4b7764a	23	-16442	Not Applicable	0	816	TCGA-23-1026-D25613;TCGA-23-1026-D25611;TCGA-23-1026-D25612;TCGA-23-1026-D25614	98eca7c8-8f45-43b4-806f-193aba7901b6;5e32312e-6a0d-4e28-a91e-b186be5f1c1c;8eb2970b-6005-448d-b3aa-a1ebcc49df1f;3b5456ab-a33b-4cbf-b0e9-6958219b0063	Not Available;Not Available;Not Available;Not Available	1;1;1;1	936;108;108;936	866;7;7;866	Gemcitabine;Carboplatin;Paclitaxel;Cisplatin	Not Available;Not Available;Not Available;Not Available	4;4;4;4	05;06;06;05	Not Available;Not Available;Not Available;Not Available	mg;mg;mg;mg	RECURRENCE;ADJUVANT;ADJUVANT;RECURRENCE	Not Applicable;Not Applicable;Not Applicable;Not Applicable	Not Available;Not Available;Not Available;Not Available	IP;IV;IV;IV;IP;IV	NO;NO;NO;NO	Chemotherapy;Chemotherapy;Chemotherapy;Chemotherapy	Not Available;Not Available;Not Available;Not Available	5648;3420;1560;520	mg;mg;mg;mg	Not Available;Not Available;Not Available;Not Available	2009;2009;2009;2009	Not Available	NOT HISPANIC OR LATINO	TCGA-23-1026-F25610	adc0c0f8-0f93-40af-862a-f2efc4dd6cf1
TCGA-29-1698	FEMALE	2078	Serous Cystadenocarcinoma	Ovary	Alive	Stage IIIC	G3	1	181		Recurrence	WITH TUMOR		53	Bilateral	TCGA-29-1698	18d21132-a795-4551-83ba-66483de423a2	2	-19611	Not Applicable	0	2078	TCGA-29-1698-D27228;TCGA-29-1698-D27229;TCGA-29-1698-D27236;TCGA-29-1698-D27239;TCGA-29-1698-D27235;TCGA-29-1698-D27232;TCGA-29-1698-D27231;TCGA-29-1698-D27233;TCGA-29-1698-D27240;TCGA-29-1698-D27230;TCGA-29-1698-D27234;TCGA-29-1698-D27237;TCGA-29-1698-D27238	d19d3315-e66f-4c1a-ac23-98bece9f387a;b9c29270-ee60-4e30-a093-5f075678c76a;a7599369-16cc-498d-a785-820ab146b2f3;f5e6d97b-a6dc-4699-8440-cfe1999a7c59;9c5d0db2-99d5-41ba-b046-73bcf1606509;61b62b7a-751e-47c8-952b-ae69e732b57f;67b7d4d3-f5ae-4f94-854b-bd9759d9535e;4515594c-0c88-4d51-80b8-5b339a8c5f5f;ac7e4095-4661-4ea2-bd92-532cd8fe44c8;6ad63dbf-f942-4b8a-bf8f-e7dd53d68606;9879c952-a90b-4770-80e8-145d5…	Not Available;Not Available;Not Available;Not Available;Not Available;Not Available;Not Available;Not Available;Not Available;Not Available;Not Available;Not Available;Not Available	11;11;9;9;9;9;9;9;9;9;9;9;9	237;237;1972;1419;1783;1566;853;1349;1580;909;1587;2028;2245	8;8;1811;328;1615;1321;741;1321;1524;741;1580;1986;2051	Carboplatin;Paclitaxel;Paclitaxel;Tamoxifen;Doxil;Gemcitabine HCL;Docetaxel;Carboplatin;Avastin (Bevacizumab);Carboplatin;Toptecan;Docetaxel;Carboplatin	Not Available;Not Available;Not Available;Not Available;Not Available;Not Available;Not Available;Not Available;Not Available;Not Available;Not Available;Not Available;Not Available	12;12;4;4;4;4;4;4;4;4;4;4;4	09;09;17;Not Available;07;06;07;02;Not Available;05;01;03;08	Not Available;Not Available;Not Available;Not Available;Not Available;Not Available;Not Available;Not Available;Not Available;Not Available;Not Available;Not Available;Not Available	mg;mg;mg;mg;mg;mg;mg;mg;mg;mg;mg;mg;AUC	ADJUVANT;ADJUVANT;PROGRESSION;RECURRENCE;PROGRESSION;RECURRENCE;RECURRENCE;RECURRENCE;RECURRENCE;RECURRENCE;PROGRESSION;PROGRESSION;PROGRESSION	Not Applicable;Not Applicable;Not Applicable;Not Applicable;Not Applicable;Not Applicable;Not Applicable;Not Applicable;Not Applicable;Not Applicable;Not Applicable;Not Applicable;Not Applicable	Not Available;Not Available;Not Available;Not Available;Not Available;Not Available;Not Available;Not Available;Not Available;Not Available;Not Available;Not Available;Not Available	IV;IV;IV;Not Available;IV;IV;IV;IV;Not Available;IV;IV;IV;IV	NO;NO;NO;NO;NO;NO;NO;NO;NO;NO;NO;NO;YES	Chemotherapy;Chemotherapy;Chemotherapy;Hormone Therapy;Chemotherapy;Chemotherapy;Chemotherapy;Chemotherapy;Targeted Molecular therapy;Chemotherapy;Chemotherapy;Chemotherapy;Chemotherapy	Not Available;Not Available;Not Available;Not Available;Not Available;Not Available;Not Available;Not Available;Not Available;Not Available;Not Available;Not Available;Not Available	5600;2603;100;20;68;1020;53;510;600;570;5;100;5	mg;mg;mg;mg;mg;mg;mg;mg;mg;mg;mg;mg;AUC	Not Available;Not Available;Not Available;Not Available;Not Available;Not Available;Not Available;Not Available;Not Available;Not Available;Not Available;Not Available;Not Available	2009;2009;2010;2010;2010;2010;2010;2010;2010;2010;2010;2010;2010	Not Available	Not Available	TCGA-29-1698-F27227	3f529423-5e1c-423a-82d2-6b60842e06f5
TCGA-13-0805	FEMALE	1074	Serous Cystadenocarcinoma	Ovary	Dead	Stage IIIC	G3	1	177		Progression of Disease	WITH TUMOR		57	Bilateral	TCGA-13-0805	2a3a6222-f477-4198-ab9e-cdf527c1a6cf	25	-21014	1074	0	1073	TCGA-13-0805-D24639;TCGA-13-0805-D24640	bb8c4793-e6e0-4827-ba78-fcd2a9e25910;77384840-9b33-4f4c-9b08-37d02ec121b7	Not Available;Not Available	15;15	151;151	17;17	Carboplatin;Paclitaxel	Not Available;Not Available	4;4	6;6	Not Available;Not Available	Not Available;mg/m2	ADJUVANT;ADJUVANT	Not Applicable;Not Applicable	Not Available;Not Available	IV;IV	NO;NO	Chemotherapy;Chemotherapy	Not Available;Not Available	Not Available;Not Available	Not Available;mg/m2	Not Available;Not Available	2009;2009	Not Available	NOT HISPANIC OR LATINO	TCGA-13-0805-F24638	83b411a0-6a00-4c33-a14a-243c680e9403
TCGA-23-2079	FEMALE	2788	Serous Cystadenocarcinoma	Ovary	Alive	Stage IIIC	G3	1	283		Recurrence	TUMOR FREE		46	Bilateral	TCGA-23-2079	e3ea5137-76b8-4afc-9b80-ed74714e7172	20	-17122	Not Applicable	0	2788	TCGA-23-2079-D25778;TCGA-23-2079-D25776;TCGA-23-2079-D25779;TCGA-23-2079-D25777	366f4c76-78f8-4c6e-afa5-375494d96d7e;8b9712e1-d798-4f32-b9a7-1087b0a93e16;fb19a65d-7489-4347-8ea4-b6d265cdcaf6;04a0cf5a-70ec-4199-bbaa-75569a40bec1	Not Available;Not Available;Not Available;Not Available	20;20;20;20	489;125;2147;125	296;4;2102;4	Doxil;Paclitaxel;Carboplatin;Carboplatin	Not Available;Not Available;Not Available;Not Available	11;11;11;11	09;06;03;06	Not Available;Not Available;Not Available;Not Available	mg;mg;mg;mg	RECURRENCE;ADJUVANT;RECURRENCE;ADJUVANT	Not Applicable;Not Applicable;Not Applicable;Not Applicable	Not Available;Not Available;Not Available;Not Available	IV;IV;IV;IV	NO;NO;NO;NO	Chemotherapy;Chemotherapy;Chemotherapy;Chemotherapy	Not Available;Not Available;Not Available;Not Available	663;1800;1651;3420	mg;mg;mg;mg	Not Available;Not Available;Not Available;Not Available	2009;2009;2009;2009	Not Available	NOT HISPANIC OR LATINO	TCGA-23-2079-F25775	0b186b74-05f4-4e60-86de-30afe98b56e3
TCGA-36-2538	FEMALE	763	Serous Cystadenocarcinoma	Ovary	Alive	Stage IIIB	G3	1	523		Recurrence	WITH TUMOR		37	Right	TCGA-36-2538	3ea880f4-7a78-4cb7-bfe4-54b3c30a812e	18	-13681	Not Applicable	0	763	TCGA-36-2538-D27932;TCGA-36-2538-D27933;TCGA-36-2538-D27934;TCGA-36-2538-D27931	21626185-0374-4efb-867e-ac1a9976bdd6;705a490a-ccbc-41a1-809c-d3f33a0265f2;5c21d21c-6cbb-45e6-89d4-afdc7839cae1;387a8a6f-3cad-4e2f-b5ac-9faf5418cfe4	Not Available;Not Available;Not Available;Not Available	18;18;18;18	212;682;682;212	72;542;542;72	Pacitaxel;Carboplatin;Liposomal Doxorubicin;Carboplatin	Not Available;Not Available;Not Available;Not Available	8;8;8;8	06;06;06;06	270;680;38;690	mg;mg;mg;mg	ADJUVANT;RECURRENCE;RECURRENCE;ADJUVANT	Not Applicable;Not Applicable;Not Applicable;Not Applicable	Not Available;Not Available;Not Available;Not Available	IV;IV;IV;IV	NO;NO;NO;NO	Chemotherapy;Chemotherapy;Chemotherapy;Chemotherapy	Not Available;Not Available;Not Available;Not Available	1620;4080;238;4140	mg;mg;mg;mg	Not Available;Not Available;Not Available;Not Available	2010;2010;2010;2010	Not Available	Not Available	TCGA-36-2538-F27930	89084cd7-3421-4d79-be7e-f24a2bdf54c6
TCGA-23-1031	FEMALE	575	Serous Cystadenocarcinoma	Ovary	Dead	Stage IV	G3	0	575			WITH TUMOR		60	Left	TCGA-23-1031	c7c3fe4a-327a-4b7e-a259-989b72971209	23	-22225	575	0	575	TCGA-23-1031-D25653;TCGA-23-1031-D25656;TCGA-23-1031-D25651;TCGA-23-1031-D25655;TCGA-23-1031-D25652;TCGA-23-1031-D25654;TCGA-23-1031-D25657;TCGA-23-1031-D25650	d9844a5a-51b3-43da-b153-53e40564a073;7ac6d001-2bdb-4e6a-863d-a72c506dfd1c;9be966b3-0747-412f-a979-39238e9d9e22;57796331-d5b0-4b3d-9544-405b027f6373;ae37b6fb-a4cb-4003-b9e4-6cbc3d5ef1b2;285fafde-48f2-415b-bf55-b7e7ef4e6253;a876fbfc-b6f9-425c-9f99-8581d9c760ab;6c520881-7f90-4327-848b-639e34dda8b9	Not Available;Not Available;Not Available;Not Available;Not Available;Not Available;Not Available;Not Available	27;27;27;27;27;27;27;27	446;477;166;485;321;446;555;166	341;460;26;460;265;341;541;26	Gemcitabine;Xeloda;Paclitaxel;Docetaxel;Doxorubicin;Cisplatin;Topotecan;Carboplatin	Not Available;Not Available;Not Available;Not Available;Not Available;Not Available;Not Available;Not Available	3;3;3;3;3;3;3;3	11;2;7;2;3;11;2;7	Not Available;Not Available;Not Available;Not Available;Not Available;Not Available;Not Available;Not Available	mg;mg;mg;mg;mg;mg;mg;Not Available	ADJUVANT;PROGRESSION;ADJUVANT;PROGRESSION;ADJUVANT;ADJUVANT;PROGRESSION;ADJUVANT	Not Applicable;Not Applicable;Not Applicable;Not Applicable;Not Applicable;Not Applicable;Not Applicable;Not Applicable	Not Available;Not Available;Not Available;Not Available;Not Available;Not Available;Not Available;Not Available	IV;PO;IV;IV;IV;IV;IV;IV	NO;NO;NO;NO;NO;NO;NO;NO	Chemotherapy;Chemotherapy;Chemotherapy;Chemotherapy;Chemotherapy;Chemotherapy;Chemotherapy;Chemotherapy	Not Available;Not Available;Not Available;Not Available;Not Available;Not Available;Not Available;Not Available	16500;1000;2305;280;225;715;11.4;Not Available	mg;mg;mg;mg;mg;mg;mg;Not Available	Not Available;Not Available;Not Available;Not Available;Not Available;Not Available;Not Available;Not Available	2009;2009;2009;2009;2009;2009;2009;2009	Not Available	NOT HISPANIC OR LATINO	TCGA-23-1031-F25649	2c5cf608-bf49-4d20-9963-e592a4b39096
TCGA-25-1318	FEMALE	1064	Serous Cystadenocarcinoma	Ovary	Dead	Stage IIIC	G3	1	185		Recurrence	WITH TUMOR		54	Bilateral	TCGA-25-1318	13319c20-02f6-4b5f-b24f-3d8f4084094c	27	-19755	1064	0	1064	TCGA-25-1318-D26656;TCGA-25-1318-D26657;TCGA-25-1318-D26658	9f44ee55-e19b-4469-a2ca-6ca3de3dea19;34a3d4ed-3134-4055-807f-d263f12fbe00;e9dbb616-a754-4560-91d3-70c2166bff27	Not Available;Not Available;Not Available	27;27;27	122;122;273	30;30;212	Taxol;Carbo;Topetecan	Not Available;Not Available;Not Available	3;3;3	6;6;4	Not Available;Not Available;Not Available	Not Available;Not Available;Not Available	ADJUVANT;ADJUVANT;PROGRESSION	Not Applicable;Not Applicable;Not Applicable	Not Available;Not Available;Not Available	IV;IV;IV	NO;NO;NO	Chemotherapy;Chemotherapy;Chemotherapy	Not Available;Not Available;Not Available	Not Available;Not Available;Not Available	Not Available;Not Available;Not Available	Not Available;Not Available;Not Available	2009;2009;2009	Not Available	NOT HISPANIC OR LATINO	TCGA-25-1318-F26655	f632b553-5ecb-48ef-84bc-d5372657f82a
TCGA-24-1563	FEMALE	1451	Serous Cystadenocarcinoma	Ovary	Dead	Stage IIIC	G3	1	396		Recurrence	WITH TUMOR		66	Left	TCGA-24-1563	52386f66-2877-4c75-894e-5c1dc03e6ef4	13	-24274	1451	0	1451	TCGA-24-1563-D26252;TCGA-24-1563-D26255;TCGA-24-1563-D26258;TCGA-24-1563-D26256;TCGA-24-1563-D26250;TCGA-24-1563-D26257;TCGA-24-1563-D26251;TCGA-24-1563-D26254;TCGA-24-1563-D26253;TCGA-24-1563-D26249	95408fd7-f755-419a-8146-2263478e1c30;f65e8c56-e88c-4759-8cb6-66183229fcd6;1e096777-3bc5-41f1-94f2-87440512f7e0;0a7b61df-19a5-490f-be5a-3ce579d751d4;bc788a60-417a-421c-8fb6-073e20697b4d;610a8295-344d-4fd1-9716-df116525edf1;dd492ae2-573e-41f7-b671-4cc2cec89e5c;268270d4-d717-41f2-9c43-964163522ded;06e2c625-c9ad-454e-bc58-427688825aeb;d33a7059-08ca-4bb1-b763-fcaade80c979	Not Available;Not Available;Not Available;Not Available;Not Available;Not Available;Not Available;Not Available;Not Available;Not Available	13;13;13;13;13;13;13;13;13;13	805;1061;1182;1239;144;1402;676;868;868;144	728;889;1087;1183;22;1402;408;812;812;22	Taxol;Carboplatin;Tamoxifen;Topotecan;Taxol;Carboplatin;Topotecan;Doxil;Gemzar;Carboplatin	Not Available;Not Available;Not Available;Not Available;Not Available;Not Available;Not Available;Not Available;Not Available;Not Available	5;5;5;5;5;5;5;5;5;5	03;08;Not Available;03;06;1;14;03;03;06	Not Available;Not Available;Not Available;Not Available;Not Available;Not Available;Not Available;Not Available;Not Available;Not Available	mg;mg;mg/day;mg;mg;mg;mg;mg;mg;mg	PROGRESSION;PROGRESSION;PROGRESSION;PROGRESSION;ADJUVANT;PROGRESSION;RECURRENCE;PROGRESSION;PROGRESSION;ADJUVANT	Not Applicable;Not Applicable;Not Applicable;Not Applicable;Not Applicable;Not Applicable;Not Applicable;Not Applicable;Not Applicable;Not Applicable	Not Available;Not Available;Not Available;Not Available;Not Available;Not Available;Not Available;Not Available;Not Available;Not Available	IV;IV;PO;IV;IV;IV;IV;IV;IV;IV	NO;NO;NO;NO;NO;NO;NO;NO;NO;NO	Chemotherapy;Chemotherapy;Hormone Therapy;Chemotherapy;Chemotherapy;Chemotherapy;Chemotherapy;Chemotherapy;Chemotherapy;Chemotherapy	Not Available;Not Available;Not Available;Not Available;Not Available;Not Available;Not Available;Not Available;Not Available;Not Available	1050;3310;20;24.7;1910;459;135;181;2820;3450	mg;mg;mg/day;mg;mg;mg;mg;mg;mg;mg	Not Available;Not Available;Not Available;Not Available;Not Available;Not Available;Not Available;Not Available;Not Available;Not Available	2009;2009;2009;2009;2009;2009;2009;2009;2009;2009	Not Available	Not Available	TCGA-24-1563-F26248	4a3e5d73-58ba-403c-91a7-92653e760093
TCGA-61-2017	FEMALE	1398	Serous Cystadenocarcinoma	Ovary	Alive	Stage IIIC	G1	1	1006		Recurrence	WITH TUMOR		64	Bilateral	TCGA-61-2017	f0ca8205-0754-4bd8-a6a8-31901040c5e7	8	-23509	Not Applicable	0	1398	TCGA-61-2017-D28364;TCGA-61-2017-D28361;TCGA-61-2017-D28360;TCGA-61-2017-D28363;TCGA-61-2017-D28362	d8e6f6d0-11e5-4857-9176-65b9fd0c367b;90f7abab-7512-4fca-acad-6e58dec64576;61c43bff-0d72-4d2c-922c-9694670bfceb;7c13d883-2763-4805-b918-f5c98710e43d;d69aaa81-29d1-4b99-baa8-5b5f7db327bb	Not Available;Not Available;Not Available;Not Available;Not Available	8;8;8;8;8	1186;Not Available;Not Available;1186;1186	1053;34;34;1053;1053	Taxol;Carboplatin;Taxol;Taxol;Cisplatin	Not Available;Not Available;Not Available;Not Available;Not Available	12;12;12;12;12	06;06;06;06;06	Not Available;Not Available;Not Available;Not Available;Not Available	mg;Not Available;Not Available;mg;mg	RECURRENCE;ADJUVANT;ADJUVANT;RECURRENCE;RECURRENCE	Not Applicable;Not Applicable;Not Applicable;Not Applicable;Not Applicable	Not Available;Not Available;Not Available;Not Available;Not Available	IP;IV;IV;IV;IP;IV;IP;IV	NO;NO;NO;NO;NO	Chemotherapy;Chemotherapy;Chemotherapy;Chemotherapy;Chemotherapy	Not Available;Not Available;Not Available;Not Available;Not Available	1206;Not Available;Not Available;456;618	mg;Not Available;Not Available;mg;mg	Not Available;Not Available;Not Available;Not Available;Not Available	2009;2009;2009;2009;2009	Not Available	Not Available	TCGA-61-2017-F28359	a1de5eb8-5151-4daa-aa00-cae596d21fa0
TCGA-25-1313	FEMALE	820	Serous Cystadenocarcinoma	Ovary	Dead	Stage IV	G3	1	394		Recurrence	WITH TUMOR		62	Bilateral	TCGA-25-1313	d73a0a33-e4e8-44bd-9580-2038ab06583a	27	-22982	820	0	820	TCGA-25-1313-D26629;TCGA-25-1313-D26630;TCGA-25-1313-D26631	9a05fe1c-906f-4d7a-9f6e-1d0ff03b187b;4f66c38b-6088-4295-adf1-a6dfc5e09598;64b80a98-0e23-47cf-bcb1-77881ca35bf0	Not Available;Not Available;Not Available	27;27;27	151;151;547	29;29;394	Taxol;Carbo;Topotecan	Not Available;Not Available;Not Available	3;3;3	6;6;5	Not Available;Not Available;Not Available	Not Available;Not Available;Not Available	ADJUVANT;ADJUVANT;RECURRENCE	Not Applicable;Not Applicable;Not Applicable	Not Available;Not Available;Not Available	IV;IV;IV	NO;NO;NO	Chemotherapy;Chemotherapy;Chemotherapy	Not Available;Not Available;Not Available	Not Available;Not Available;Not Available	Not Available;Not Available;Not Available	Not Available;Not Available;Not Available	2009;2009;2009	Not Available	NOT HISPANIC OR LATINO	TCGA-25-1313-F26628	61ada3f9-4015-4673-ac92-e08e99fa05b8
TCGA-04-1638	FEMALE	1686	Serous Cystadenocarcinoma	Ovary	Dead	Stage IV	G3	1	298		Recurrence	TUMOR FREE		57	Not Available	TCGA-04-1638	c75c915f-ef4b-4c19-8ace-995e6c6015fd	2	-20987	1686	0	Not Available	TCGA-04-1638-D24141;TCGA-04-1638-D24142;TCGA-04-1638-D24138;TCGA-04-1638-D24140;TCGA-04-1638-D24137;TCGA-04-1638-D24139	63e4b64e-ff9e-4716-b524-46b22d2fb4de;529c5977-9ad5-40f3-89f3-4b26793a407e;e2445899-ef2f-48ec-b6cf-24b31caa303c;486f4a95-24cd-4047-8ae4-2d0d1bf97c21;07806476-c405-476d-9b26-904d536b25ac;8b200c15-6dc8-468b-b56f-e0d576fc6f0f	Not Available;Not Available;Not Available;Not Available;Not Available;Not Available	9;9;9;9;9;9	Not Available;Not Available;193;Not Available;193;193	346;346;17;346;17;17	Carboplatin;Taxol;Carboplatin;Doxil;Taxol;Gemcitibine	Not Available;Not Available;Not Available;Not Available;Not Available;Not Available	11;11;11;11;11;11	Not Available;Not Available;08;Not Available;08;08	Not Available;Not Available;Not Available;Not Available;Not Available;Not Available	Not Available;Not Available;mg;Not Available;mg;mg	RECURRENCE;RECURRENCE;ADJUVANT;RECURRENCE;ADJUVANT;ADJUVANT	Not Applicable;Not Applicable;Not Applicable;Not Applicable;Not Applicable;Not Applicable	Not Available;Not Available;Not Available;Not Available;Not Available;Not Available	Not Available;Not Available;IV;Not Available;IV;IV	NO;NO;NO;NO;NO;NO	Chemotherapy;Chemotherapy;Chemotherapy;Chemotherapy;Chemotherapy;Chemotherapy	Not Available;Not Available;Not Available;Not Available;Not Available;Not Available	Not Available;Not Available;2990;Not Available;968;11400	Not Available;Not Available;mg;Not Available;mg;mg	Not Available;Not Available;Not Available;Not Available;Not Available;Not Available	2009;2009;2009;2009;2009;2009	0	Not Available	TCGA-04-1638-F24136	9dd72b20-6a99-48af-bd9b-a8890dd66dfd
TCGA-13-1506	FEMALE	1039	Serous Cystadenocarcinoma	Ovary	Dead	Stage IIIC	G3	1	666			TUMOR FREE		45	Bilateral	TCGA-13-1506	1cc02c64-a34e-46ae-9bc7-5d50f2fefb31	31	-16734	Not Applicable	0	134	TCGA-13-1506-D24948;TCGA-13-1506-D24947;TCGA-13-1506-D24946;TCGA-13-1506-D24945;TCGA-13-1506-D24950;TCGA-13-1506-D24949	3f0348d6-1607-4e20-9dad-1c18f02ca8e6;d8424615-0858-44a6-a544-4f86f99b6742;db2514fa-f3d7-4744-aeb2-3ea6191e9513;eed33a2f-1991-431e-aed9-a80e2fff5f9a;334b7af7-5669-4098-b07a-2e3d85e88871;58d4d7d7-f9d6-4800-a354-11dc5d9a086e	Not Available;Not Available;Not Available;Not Available;Not Available;Not Available	29;29;29;29;1;1	80;80;51;51;197;197	79;79;50;50;99;99	Gemcitabine;Cisplatin;Docetaxel;Cisplatin;Gemcitabine;Carboplatin	Not Available;Not Available;Not Available;Not Available;Not Available;Not Available	6;6;6;6;2;2	1;1;1;1;5;5	Not Available;Not Available;Not Available;Not Available;800;Not Available	mg/m2;mg/m2;mg/m2;mg/m2;mg/m2;AUC	ADJUVANT;ADJUVANT;ADJUVANT;ADJUVANT;ADJUVANT;ADJUVANT	Not Applicable;Not Applicable;Not Applicable;Not Applicable;Not Applicable;Not Applicable	Not Available;Not Available;Not Available;Not Available;Not Available;Not Available	IP;IV;IP;IV;IP;IV;IP;IV;IV;IV	NO;NO;NO;NO;NO;NO	Chemotherapy;Chemotherapy;Chemotherapy;Chemotherapy;Chemotherapy;Chemotherapy	Not Available;Not Available;Not Available;Not Available;Not Available;Not Available	800;75;65;75;Not Available;4	mg/m2;mg/m2;mg/m2;mg/m2;mg/m2;AUC	Not Available;Not Available;Not Available;Not Available;Not Available;Not Available	2009;2009;2009;2009;2010;2010	Not Available	NOT HISPANIC OR LATINO	TCGA-13-1506-F24944;TCGA-13-1506-F72675	c38894f1-b486-48fd-acc2-f53027cb3ffa;418B4CC1-852C-4998-AB55-8C04A0526522
TCGA-13-1495	FEMALE	2749	Serous Cystadenocarcinoma	Ovary	Dead	Stage IIIC	G2	1	977		Recurrence	WITH TUMOR		60	Bilateral	TCGA-13-1495	74dcdfb4-a637-4111-9a22-4b4bc7bbc8f7	31	-22046	Not Applicable	0	1498	TCGA-13-1495-D24899;TCGA-13-1495-D24901;TCGA-13-1495-D24900;TCGA-13-1495-D24898;TCGA-13-1495-D24902	19c672b1-5c6a-4562-80fb-a01df80b0337;cbd8492b-b71f-43ef-aaa8-7902407ef2a8;5b1848c8-8f23-471a-9171-95fd53eac209;878063e7-b796-4aa4-aecb-55060d6028ab;ef97d8d6-aea8-42de-9b62-054e1106d2ae	Not Available;Not Available;Not Available;Not Available;Not Available	29;29;29;29;29	140;119;548;140;224	21;21;231;21;147	Paclitaxel;Cetuximab;Paclitaxel;Carboplatin;Cetuximab	Not Available;Not Available;Not Available;Not Available;Not Available	6;6;6;6;6	6;Not Available;12;6;Not Available	Not Available;Not Available;Not Available;Not Available;Not Available	mg/m2;mg/m2;mg/m2;Not Available;mg/m2	ADJUVANT;ADJUVANT;ADJUVANT;ADJUVANT;ADJUVANT	Not Applicable;Not Applicable;Not Applicable;Not Applicable;Not Applicable	Not Available;Not Available;Not Available;Not Available;Not Available	IV;Not Available;IV;IV;Not Available	NO;NO;NO;NO;NO	Chemotherapy;Targeted Molecular therapy;Chemotherapy;Chemotherapy;Targeted Molecular therapy	Not Available;Not Available;Not Available;Not Available;Not Available	175;250;175;6;250	mg/m2;mg/m2;mg/m2;Not Available;mg/m2	Not Available;Not Available;Not Available;Not Available;Not Available	2009;2009;2009;2009;2009	Not Available	NOT HISPANIC OR LATINO	TCGA-13-1495-F24897;TCGA-13-1495-F72645	ff28eb04-b270-4a74-9b59-fcdc531eaeaf;5691E281-AC17-493B-9BD9-30E563655424
TCGA-23-1111	FEMALE	98	Serous Cystadenocarcinoma	Ovary	Alive	Stage IIIC	G3	0	98			Not Available		63	Right	TCGA-23-1111	6b2a9f9a-fe96-4311-a330-925c4ad36fe7	2	-23171	Not Applicable	0	98	TCGA-23-1111-D25674;TCGA-23-1111-D25675;TCGA-23-1111-D25673	23d2be25-9d1f-4e0d-a2cd-ce35c16e2cd9;5b8a8e00-e4be-4a14-a676-a1e13668a596;47ac4877-04ba-4b1e-8cd0-abbe3e23f2e2	Not Available;Not Available;Not Available	12;12;12	129;129;129	45;24;24	Investigal drug Avastin;Carboplatin;Taxol	Not Available;Not Available;Not Available	8;8;8	05;06;06	Not Available;Not Available;Not Available	mg;mg;mg	ADJUVANT;ADJUVANT;ADJUVANT	Not Applicable;Not Applicable;Not Applicable	Not Available;Not Available;Not Available	IV;IV;IV	NO;NO;NO	Chemotherapy;Chemotherapy;Chemotherapy	Not Available;Not Available;Not Available	5850;3389;1860	mg;mg;mg	Not Available;Not Available;Not Available	2009;2009;2009	Not Available	Not Available	TCGA-23-1111-F25672	5e8299c1-4db5-4867-afc7-db96e4f3fe68
TCGA-36-2537	FEMALE	788	Serous Cystadenocarcinoma	Ovary	Alive	Stage IIIC	G3	1	431		Progression of Disease	WITH TUMOR		39	Bilateral	TCGA-36-2537	5075cdc1-1b7c-4e25-98ea-fb568bd35f2d	18	-14595	Not Applicable	0	788	TCGA-36-2537-D27925;TCGA-36-2537-D27924;TCGA-36-2537-D27926;TCGA-36-2537-D27927;TCGA-36-2537-D27928	c3174758-216c-4fc8-8a98-36a43e572c20;95758800-a6d0-45e1-8d9a-5752cd7fc5a6;13bac041-aab1-4e77-b1bf-d66aab5c449c;f86a3fa0-169d-4c38-b7ae-1895cedf7055;ef10bbf8-5e83-430a-ab10-ddebd51a9219	Not Available;Not Available;Not Available;Not Available;Not Available	18;18;18;18;18	125;125;614;614;763	20;20;474;474;721	Paclitaxel;Carboplatin;Carboplatin;Liposomal Doxorubicin;Gemcitabine	Not Available;Not Available;Not Available;Not Available;Not Available	8;8;8;8;8	06;06;06;06;06	301;893;850;55;1512	mg;mg;mg;mg;mg	ADJUVANT;ADJUVANT;RECURRENCE;RECURRENCE;PROGRESSION	Not Applicable;Not Applicable;Not Applicable;Not Applicable;Not Applicable	Not Available;Not Available;Not Available;Not Available;Not Available	IV;IV;IV;IV;IV	NO;NO;NO;NO;NO	Chemotherapy;Chemotherapy;Chemotherapy;Chemotherapy;Chemotherapy	Not Available;Not Available;Not Available;Not Available;Not Available	1806;5358;5100;330;9072	mg;mg;mg;mg;mg	Not Available;Not Available;Not Available;Not Available;Not Available	2010;2010;2010;2010;2010	2	Not Available	TCGA-36-2537-F27923	16ec4be7-a32c-4b9e-bae5-30c468066390
TCGA-25-1319	FEMALE	1977	Serous Cystadenocarcinoma	Ovary	Dead	Stage IIIC	G3	1	730		Recurrence	Not Available		73	Bilateral	TCGA-25-1319	914d8613-3c25-4a10-be50-28b42f4d3a5d	27	-26786	1977	0	1977	TCGA-25-1319-D26662;TCGA-25-1319-D26661	994fc650-88ad-49bc-83d0-b2f707ef5859;c61612c2-a456-4253-97b0-a3354dfbd96a	Not Available;Not Available	27;27	Not Available;Not Available	61;61	Taxol;Carbo	Not Available;Not Available	3;3	6;6	Not Available;Not Available	Not Available;Not Available	ADJUVANT;ADJUVANT	Not Applicable;Not Applicable	Not Available;Not Available	IV;IV	Not Available;Not Available	Chemotherapy;Chemotherapy	Not Available;Not Available	Not Available;Not Available	Not Available;Not Available	Not Available;Not Available	2009;2009	Not Available	NOT HISPANIC OR LATINO	TCGA-25-1319-F26660	760f24c1-7601-415f-8c8f-79778d72eea4
TCGA-13-2071	FEMALE	773	Serous Cystadenocarcinoma	Ovary	Dead	Stage IV	G3	1	322			TUMOR FREE		63	Bilateral	TCGA-13-2071	0d15e5aa-2483-4f81-973a-ff469296c911	1	-23367	Not Applicable	0	191	TCGA-13-2071-D25023;TCGA-13-2071-D25024	35bbcd97-398d-453a-a49d-0e9a5d097a8b;de33c7f9-63e7-415d-9648-7c5dc597446e	Not Available;Not Available	1;1	146;146	41;41	Carboplatin;Paclitaxel	Not Available;Not Available	2;2	6;6	Not Available;Not Available	mg;mg/m2	ADJUVANT;ADJUVANT	Not Applicable;Not Applicable	Not Available;Not Available	IV;IV	Not Available;NO	Chemotherapy;Chemotherapy	Not Available;Not Available	Not Available;Not Available	mg;mg/m2	Not Available;Not Available	2010;2010	Not Available	NOT HISPANIC OR LATINO	TCGA-13-2071-F25022;TCGA-13-2071-F72689	557458c9-a795-4c0c-bd75-106debd147c0;612CD70B-9F6A-486B-9DA7-ECA4801953BA
TCGA-04-1370	FEMALE	1824	Serous Cystadenocarcinoma	Ovary	Alive	Stage IIIC	G3	0	1824			Not Available		52	Bilateral	TCGA-04-1370	7e6cdbc7-26a7-44f2-96fa-094738cbccae	12	-19329	Not Applicable	0	1824	TCGA-04-1370-D24063;TCGA-04-1370-D24064	83f67477-8b87-4f45-b848-4f793508c589;643a2e01-ac72-408c-b5cb-c8de74fe6c58	Not Available;Not Available	12;12	200;200	8;8	Paclitaxel;Carboplatin	Not Available;Not Available	8;8	08;08	315;528	mg;mg	ADJUVANT;ADJUVANT	Not Applicable;Not Applicable	Not Available;Not Available	IV;IV	NO;NO	Chemotherapy;Chemotherapy	Not Available;Not Available	2520;5320	mg;mg	Not Available;Not Available	2010;2010	1	Not Available	TCGA-04-1370-F24062	51c21a91-4729-46db-9a19-2b5383585fcd
TCGA-24-2030	FEMALE	972	Serous Cystadenocarcinoma	Ovary	Dead	Stage IIIC	G3	1	646		Recurrence	WITH TUMOR		87	Left	TCGA-24-2030	d2ccefea-c1d6-465f-97b1-e51e29c5f1f8	3	-31900	972	0	972	TCGA-24-2030-D26483;TCGA-24-2030-D26481;TCGA-24-2030-D26484;TCGA-24-2030-D26486;TCGA-24-2030-D26485;TCGA-24-2030-D26482;TCGA-24-2030-D26488;TCGA-24-2030-D26487	70169bdf-9305-4494-a6f9-4d83f54bdc26;86e9993c-2161-4fd6-8e3b-d782e8d7b07c;d7b6b9ee-28f5-434d-9f33-4f7733e9670b;f3d03ec6-706d-44d0-a89b-d662bc0bb9ea;5e971953-a98a-4612-bf01-e5f656e45ff8;29f56a89-c0a3-487d-8cde-7998973ac418;b3ffba76-89e3-409b-8ffa-d79a8440d978;983be44f-bafd-4148-897e-f00814c3f649	Not Available;Not Available;Not Available;Not Available;Not Available;Not Available;Not Available;Not Available	16;16;16;16;16;16;16;16	790;127;790;972;972;127;972;972	657;13;657;972;864;13;972;972	Taxol;Taxol;Carboplatin;Doxil;Topotecan;Carboplatin;Carboplatin;Taxol	Not Available;Not Available;Not Available;Not Available;Not Available;Not Available;Not Available;Not Available	3;3;3;3;3;3;3;3	06;06;06;01;06;06;05;11	Not Available;Not Available;Not Available;Not Available;Not Available;Not Available;Not Available;Not Available	mg;mg;mg;mg;mg;mg;mg;mg	RECURRENCE;ADJUVANT;RECURRENCE;PROGRESSION;PROGRESSION;ADJUVANT;PROGRESSION;PROGRESSION	Not Applicable;Not Applicable;Not Applicable;Not Applicable;Not Applicable;Not Applicable;Not Applicable;Not Applicable	Not Available;Not Available;Not Available;Not Available;Not Available;Not Available;Not Available;Not Available	IV;IV;IV;IV;IV;IV;IV;IV	NO;NO;NO;NO;NO;NO;NO;NO	Chemotherapy;Chemotherapy;Chemotherapy;Chemotherapy;Chemotherapy;Chemotherapy;Chemotherapy;Chemotherapy	Not Available;Not Available;Not Available;Not Available;Not Available;Not Available;Not Available;Not Available	1380;1064;1778;50;48;2334;1420;1100	mg;mg;mg;mg;mg;mg;mg;mg	Not Available;Not Available;Not Available;Not Available;Not Available;Not Available;Not Available;Not Available	2010;2010;2010;2010;2010;2010;2010;2010	Not Available	Not Available	TCGA-24-2030-F26480	074d1e6b-3a3f-4b8c-9638-617b4d07067a
TCGA-04-1353	FEMALE	16	Serous Cystadenocarcinoma	Ovary	Alive	Stage IIIC	Not Available	0	16			Not Available		64	Not Available	TCGA-04-1353	cddbac56-2861-46a5-98a3-df32ab69d5da	19	-23611	Not Applicable	0	16																								Unknown	NOT HISPANIC OR LATINO	TCGA-04-1353-F65201	825C57A6-B8EF-4C2B-B4A3-D081332802BA
TCGA-24-2262	FEMALE	11	Serous Cystadenocarcinoma	Ovary	Dead	Stage IIIC	G3	0	11			WITH TUMOR		57	Right	TCGA-24-2262	1d0225b5-f515-4197-bba7-3dc17e502b88	15	-20861	11	0	11																								Not Available	Not Available	TCGA-24-2262-F26542	30c94fb2-d573-4b84-a3c1-26710ad63770
TCGA-61-1911	FEMALE	1293	Serous Cystadenocarcinoma	Ovary	Alive	Stage IIA	G3	1	844		Recurrence	WITH TUMOR		55	Left	TCGA-61-1911	93095c36-2263-438f-a619-a4a4d6ae13c7	1	-20144	Not Applicable	0	1293	TCGA-61-1911-D28261;TCGA-61-1911-D28264;TCGA-61-1911-D28267;TCGA-61-1911-D28265;TCGA-61-1911-D28263;TCGA-61-1911-D28266;TCGA-61-1911-D28262	07995a31-b89c-4dcf-a2ac-8df6206991d6;57b42526-f8f9-4174-9f48-ef76fc389e56;35c6a1ab-a350-42c4-adc4-1f8a13363ab3;d1f8adbb-656c-4ba2-897a-f44078508729;0cdd8ba8-eb65-46bb-aed4-903e1f8e4311;d66c5aa9-31ea-436a-b0f6-83a2a727862c;50d13255-fa36-4270-9b48-bf97f80061db	Not Available;Not Available;Not Available;Not Available;Not Available;Not Available;Not Available	4;4;4;4;4;4;4	144;998;1432;1432;998;1432;144	34;893;1306;1306;893;1306;34	Carboplatin;Carboplatin;Carboplatin;Gemzar;Gemzar;Avastin;Taxol	Not Available;Not Available;Not Available;Not Available;Not Available;Not Available;Not Available	12;12;12;12;12;12;12	06;06;07;07;06;07;06	Not Available;Not Available;Not Available;Not Available;Not Available;Not Available;Not Available	mg;mg;mg;mg;mg;mg;mg	ADJUVANT;RECURRENCE;RECURRENCE;RECURRENCE;RECURRENCE;RECURRENCE;ADJUVANT	Not Applicable;Not Applicable;Not Applicable;Not Applicable;Not Applicable;Not Applicable;Not Applicable	Not Available;Not Available;Not Available;Not Available;Not Available;Not Available;Not Available	IV;IV;IV;IV;IV;IV;IV	NO;NO;NO;NO;NO;NO;NO	Chemotherapy;Chemotherapy;Chemotherapy;Chemotherapy;Chemotherapy;Chemotherapy;Chemotherapy	Not Available;Not Available;Not Available;Not Available;Not Available;Not Available;Not Available	4650;3000;5700;9800;8400;500;1710	mg;mg;mg;mg;mg;mg;mg	Not Available;Not Available;Not Available;Not Available;Not Available;Not Available;Not Available	2009;2009;2009;2009;2009;2009;2009	Not Available	NOT HISPANIC OR LATINO	TCGA-61-1911-F28260	722712b4-0368-42bd-9d7c-39f03d146e63
TCGA-30-1862	FEMALE	186	Serous Cystadenocarcinoma	Ovary	Dead	Stage IV	G2	0	186			WITH TUMOR		65	Not Available	TCGA-30-1862	58f5a54e-de50-4cca-afa1-cc331d8b3479	2	-23895	186	0	186																								Not Available	NOT HISPANIC OR LATINO	TCGA-30-1862-F27593	98838264-1d26-43dc-a7f7-7d0b7a0e956b
TCGA-04-1514	FEMALE	1720	Serous Cystadenocarcinoma	Ovary	Dead	Stage IIIA	G2	1	1221		Recurrence	TUMOR FREE		45	Bilateral	TCGA-04-1514	e9483296-cb91-497a-b955-39a3c3289dac	2	-16725	1720	0	Not Available	TCGA-04-1514-D24073;TCGA-04-1514-D24076;TCGA-04-1514-D24082;TCGA-04-1514-D24075;TCGA-04-1514-D24078;TCGA-04-1514-D24080;TCGA-04-1514-D24083;TCGA-04-1514-D24081;TCGA-04-1514-D24084;TCGA-04-1514-D24074;TCGA-04-1514-D24085;TCGA-04-1514-D24079;TCGA-04-1514-D24072;TCGA-04-1514-D24077	c3d7e061-f05f-4211-85db-5b591fbe106b;4cb85ca0-8248-46f3-8435-d03a54f46c7f;86d58252-790f-4acb-9709-e59dc68d05de;debdaa66-085a-4ee2-a1fb-322bc4779f60;2cb5bd71-e88f-4c88-8bfa-7fcecdd82169;be57a53e-ba99-469a-87a4-dd76ba5de4f8;73b76fec-4906-4c95-8a9b-c65b2072f5c3;fcab5840-933e-49df-8fef-a82d594a24f2;73a0fc31-688d-4661-a134-2088b85cbe37;d74e569d-d9e0-41af-807e-10728d5b9b7c;825eb0a8-3865-4461-a42b-9822a…	Not Available;Not Available;Not Available;Not Available;Not Available;Not Available;Not Available;Not Available;Not Available;Not Available;Not Available;Not Available;Not Available;Not Available	24;24;24;24;24;24;24;24;24;24;24;24;24;24	126;185;1587;185;1342;1495;1587;1587;1676;126;1676;1434;185;1342	34;126;1525;126;1221;1434;1464;1525;1615;34;1615;1372;34;1221	Cisplatin;Taxotere;Navelbine;Carboplatin;Taxotere;Doxil;Avastin;Topotecan;Cisplatin;Paclitaxel;Gemcitabine;Patupilone;Paclitaxel;Carboplatin	Not Available;Not Available;Not Available;Not Available;Not Available;Not Available;Not Available;Not Available;Not Available;Not Available;Not Available;Not Available;Not Available;Not Available	11;11;11;11;11;11;11;11;11;11;11;11;11;11	05;03;04;03;06;03;3;04;03;05;03;03;05;06	Not Available;Not Available;Not Available;Not Available;Not Available;Not Available;Not Available;Not Available;Not Available;Not Available;Not Available;Not Available;Not Available;Not Available	mg;mg;mg;AUC;mg;mg;mg;mg;mg;mg;mg;mg;mg;AUC	ADJUVANT;ADJUVANT;RECURRENCE;ADJUVANT;RECURRENCE;RECURRENCE;RECURRENCE;RECURRENCE;RECURRENCE;ADJUVANT;RECURRENCE;RECURRENCE;ADJUVANT;RECURRENCE	Not Applicable;Not Applicable;Not Applicable;Not Applicable;Not Applicable;Not Applicable;Not Applicable;Not Applicable;Not Applicable;Not Applicable;Not Applicable;Not Applicable;Not Applicable;Not Applicable	Not Available;Not Available;Not Available;Not Available;Not Available;Not Available;Not Available;Not Available;Not Available;Not Available;Not Available;Not Available;Not Available;Not Available	IP;IP;IV;Not Available;IP;IV;Not Available;Not Available;Not Available;Not Available;Not Available;IP;Not Available;Not Available;IV;Not Available	NO;NO;NO;NO;NO;NO;NO;NO;NO;NO;NO;NO;NO;NO	Chemotherapy;Chemotherapy;Chemotherapy;Chemotherapy;Chemotherapy;Chemotherapy;Chemotherapy;Chemotherapy;Chemotherapy;Chemotherapy;Chemotherapy;Chemotherapy;Chemotherapy;Chemotherapy	Not Available;Not Available;Not Available;Not Available;Not Available;Not Available;Not Available;Not Available;Not Available;Not Available;Not Available;Not Available;Not Available;Not Available	617;333;336;5;665;201;1750;33.6;292;494;7792;51;1112;5	mg;mg;mg;AUC;mg;mg;mg;mg;mg;mg;mg;mg;mg;AUC	Not Available;Not Available;Not Available;Not Available;Not Available;Not Available;Not Available;Not Available;Not Available;Not Available;Not Available;Not Available;Not Available;Not Available	2009;2009;2009;2009;2009;2009;2009;2009;2009;2009;2009;2009;2009;2009	1	NOT HISPANIC OR LATINO	TCGA-04-1514-F24071	5d6ed657-10c2-447e-bd5e-9a72631507ab
TCGA-13-1489	FEMALE	2553	Serous Cystadenocarcinoma	Ovary	Dead	Stage IIIC	G2	1	806		Recurrence	WITH TUMOR		70	Bilateral	TCGA-13-1489	7248cd60-be22-44bc-bc58-f644db0940a2	31	-25768	Not Applicable	0	2521	TCGA-13-1489-D24878;TCGA-13-1489-D24876;TCGA-13-1489-D24877;TCGA-13-1489-D24880;TCGA-13-1489-D24881;TCGA-13-1489-D24882;TCGA-13-1489-D24879	4eb06fd9-31b2-459d-96a0-7315217783c1;b0a011bd-04dc-4e24-b280-6c67dd5f3534;fc5425f7-3273-4bb3-838a-03543f181941;9bc5219c-8085-4ded-b99a-8444532624f6;ee222450-84ac-4896-87a4-a7c4498c0772;9acb3c04-7c91-484b-834b-639ead34a695;4bdd6d3b-c2f3-458e-91ea-4e0678cc20db	Not Available;Not Available;Not Available;Not Available;Not Available;Not Available;Not Available	30;30;30;8;8;8;8	181;272;181;868;1012;1012;868	41;272;41;867;Not Available;Not Available;867	Paclitaxel;Cisplatin;Carboplatin;Paclitaxel;Carboplatin;Taxotere;Carboplatin	Not Available;Not Available;Not Available;Not Available;Not Available;Not Available;Not Available	6;6;6;3;3;3;3	7;1;7;1;5;5;1	Not Available;Not Available;Not Available;Not Available;Not Available;60;Not Available	mg/m2;mg/m2;Not Available;Not Available;AUC;mg/m2;Not Available	ADJUVANT;ADJUVANT;ADJUVANT;RECURRENCE;RECURRENCE;RECURRENCE;RECURRENCE	Not Applicable;Not Applicable;Not Applicable;Not Applicable;Not Applicable;Not Applicable;Not Applicable	Not Available;Not Available;Not Available;Not Available;Not Available;Not Available;Not Available	IV;IP;IV;IV;IV;IV;IV	NO;NO;NO;NO;NO;NO;NO	Chemotherapy;Chemotherapy;Chemotherapy;Chemotherapy;Chemotherapy;Chemotherapy;Chemotherapy	Not Available;Not Available;Not Available;Not Available;Not Available;Not Available;Not Available	175;75;6;Not Available;5;Not Available;Not Available	mg/m2;mg/m2;Not Available;Not Available;AUC;mg/m2;Not Available	Not Available;Not Available;Not Available;Not Available;Not Available;Not Available;Not Available	2009;2009;2009;2010;2010;2010;2010	Not Available	NOT HISPANIC OR LATINO	TCGA-13-1489-F24875;TCGA-13-1489-F72641	9b9579e6-5cd9-4f4f-b084-67d406cad426;DFAA007F-8C3B-4331-8370-1A7F6E350247
TCGA-13-1501	FEMALE	1314	Serous Cystadenocarcinoma	Ovary	Dead	Stage IV	G3	1	392		Progression of Disease	WITH TUMOR		50	Bilateral	TCGA-13-1501	561968ce-da9a-4d69-8bc2-bc87b9550f93	31	-18393	Not Applicable	0	999	TCGA-13-1501-D24933;TCGA-13-1501-D24932	168cc04a-b942-44dc-906f-12795c06a1c4;dfd6e676-24dc-4684-8f20-ad1b24c3189c	Not Available;Not Available	29;29	183;183	78;78	Paclitaxel;Carboplatin	Not Available;Not Available	6;6	6;6	Not Available;Not Available	mg/m2;Not Available	ADJUVANT;ADJUVANT	Not Applicable;Not Applicable	Not Available;Not Available	IV;IV	NO;NO	Chemotherapy;Chemotherapy	Not Available;Not Available	175;5	mg/m2;Not Available	Not Available;Not Available	2009;2009	Not Available	NOT HISPANIC OR LATINO	TCGA-13-1501-F24931;TCGA-13-1501-F72651	567ddcdb-f843-4f51-81bc-9074b6b2c0a8;9FD4CF25-9CF4-4E06-91B1-8830FDC5E94F
TCGA-24-1845	FEMALE	116	Serous Cystadenocarcinoma	Ovary	Alive	Stage IIIC	G3	0	116			Not Available		42	Bilateral	TCGA-24-1845	a782352e-c4bb-4c3e-ba82-456a47c3689a	2	-15599	Not Applicable	0	116	TCGA-24-1845-D26342;TCGA-24-1845-D26341;TCGA-24-1845-D26344;TCGA-24-1845-D26343	bd50326e-286b-406c-93da-ac4a34f33bb0;648e66f9-bb04-47e6-b0b3-5924e9d57a16;3eb57026-ad81-47df-b3f8-c4a97364c200;83aed886-8165-445f-9927-bd928274d9fe	Not Available;Not Available;Not Available;Not Available	24;24;24;24	123;123;123;123	72;72;72;72	Doxetaxel;Carboplatin;Pacliatxel;Cisplatin	Not Available;Not Available;Not Available;Not Available	8;8;8;8	06;06;06;06	Not Available;Not Available;Not Available;Not Available	mg;mg;mg;mg	ADJUVANT;ADJUVANT;ADJUVANT;ADJUVANT	Not Applicable;Not Applicable;Not Applicable;Not Applicable	Not Available;Not Available;Not Available;Not Available	IP;IV;IP;IV;IP;IV;IP;IV	NO;NO;NO;NO	Chemotherapy;Chemotherapy;Chemotherapy;Chemotherapy	Not Available;Not Available;Not Available;Not Available	603;1169;118;469	mg;mg;mg;mg	Not Available;Not Available;Not Available;Not Available	2009;2009;2009;2009	Not Available	Not Available	TCGA-24-1845-F26340	589f82e0-f528-49ec-ab57-8efff59e192c
TCGA-24-1426	FEMALE	163	Serous Cystadenocarcinoma	Ovary	Alive	Stage IIIC	G3	0	163			TUMOR FREE		43	Bilateral	TCGA-24-1426	c8acee1b-6854-409b-86ab-bf69dbe22ab6	16	-15949	Not Applicable	0	163	TCGA-24-1426-D25953;TCGA-24-1426-D25952;TCGA-24-1426-D25954	ccad2740-e09b-4453-8196-ca0bba953c68;15275f97-b04f-43e1-822e-15c46ca9b9b8;b9d51cf6-9d92-4497-97a8-30a39aea0f11	Not Available;Not Available;Not Available	16;16;16	142;142;142	-8;-8;-8	Cisplatin;Taxoterecin;Taxol	Not Available;Not Available;Not Available	4;4;4	06;06;06	Not Available;Not Available;Not Available	mg;mg;mg	ADJUVANT;ADJUVANT;ADJUVANT	Not Applicable;Not Applicable;Not Applicable	Not Available;Not Available;Not Available	IV;IV;IV	NO;NO;NO	Chemotherapy;Chemotherapy;Chemotherapy	Not Available;Not Available;Not Available	900;780;720	mg;mg;mg	Not Available;Not Available;Not Available	2009;2009;2009	Not Available	Not Available	TCGA-24-1426-F25951	dcc9dd22-4227-46a6-b054-4b094b5f6718
TCGA-10-0933	FEMALE	446	Serous Cystadenocarcinoma	Ovary	Dead	Stage IIIC	G3	1	356		Recurrence	WITH TUMOR		77	Bilateral	TCGA-10-0933	9446e349-71e6-455a-aa8f-53ec96597146	6	-28433	446	0	356	TCGA-10-0933-D24456;TCGA-10-0933-D24455	89e0dd01-e64f-44ab-b287-379aa1c62a89;40b513c9-3e2c-434c-84bc-b79ca9ae8c0e	Not Available;Not Available	18;18	132;132	20;20	Carboplatin;Taxol	Not Available;Not Available	3;3	06;06	Not Available;Not Available	mg/m2;mg/m2	OTHER, SPECIFY IN NOTES;OTHER, SPECIFY IN NOTES	Adjuvant and Recurrence;Adjuvant and Recurrence	Not Available;Not Available	IV;IV	NO;NO	Chemotherapy;Chemotherapy	Not Available;Not Available	2160;1740	mg/m2;mg/m2	Not Available;Not Available	2009;2009	1	NOT HISPANIC OR LATINO	TCGA-10-0933-F24454	4cddfc2f-91c2-4d1b-959e-a407436f1faf
TCGA-25-2042	FEMALE	396	Serous Cystadenocarcinoma	Ovary	Dead	Stage IIIC	G3	1			Metastatic	WITH TUMOR		60	Bilateral	TCGA-25-2042	818dc159-aba4-46bc-a4ed-68ee0f8c4461	20	-22127	396	0	396	TCGA-25-2042-D26789;TCGA-25-2042-D26790;TCGA-25-2042-D26793;TCGA-25-2042-D26788;TCGA-25-2042-D26791;TCGA-25-2042-D26787;TCGA-25-2042-D26786;TCGA-25-2042-D26792	944d91a1-d9d3-42ea-839c-7bfac4d6e1bf;d2120dac-c367-4e8b-bf47-4defae73d882;5312bdff-a94c-42e6-9730-0eac4f016934;f51efcd0-d4f8-4952-8ded-9510e58c4648;21269f23-6d86-4696-9758-640be84884d1;36818245-ce52-4b65-a391-aaf7cdc2f464;404a7c2b-b98b-4746-8fd4-d6a9b2082d7c;3d6dee1b-1b8e-4505-8aeb-21d50754c68c	Not Available;Not Available;Not Available;Not Available;Not Available;Not Available;Not Available;Not Available	20;20;20;20;20;20;20;20	Not Available;Not Available;Not Available;Not Available;Not Available;123;123;Not Available	184;184;184;184;184;0;0;184	Carboplatin;Doxil;Topotecan;Taxol;Gemzar;Carboplatin;Taxol;Carboplatin	Not Available;Not Available;Not Available;Not Available;Not Available;Not Available;Not Available;Not Available	11;11;11;11;11;11;11;11	02;1;Not Available;02;02;06;06;02	Not Available;Not Available;Not Available;Not Available;Not Available;Not Available;Not Available;Not Available	Not Available;Not Available;Not Available;Not Available;Not Available;Not Available;Not Available;Not Available	PROGRESSION;PROGRESSION;PROGRESSION;PROGRESSION;PROGRESSION;ADJUVANT;ADJUVANT;PROGRESSION	Not Applicable;Not Applicable;Not Applicable;Not Applicable;Not Applicable;Not Applicable;Not Applicable;Not Applicable	Not Available;Not Available;Not Available;Not Available;Not Available;Not Available;Not Available;Not Available	IV;IV;IV;IV;IV;IV;IV;IV	NO;NO;NO;NO;NO;NO;NO;NO	Chemotherapy;Chemotherapy;Chemotherapy;Chemotherapy;Chemotherapy;Chemotherapy;Chemotherapy;Chemotherapy	Not Available;Not Available;Not Available;Not Available;Not Available;Not Available;Not Available;Not Available	Not Available;Not Available;Not Available;Not Available;Not Available;Not Available;Not Available;Not Available	Not Available;Not Available;Not Available;Not Available;Not Available;Not Available;Not Available;Not Available	Not Available;Not Available;Not Available;Not Available;Not Available;Not Available;Not Available;Not Available	2009;2009;2009;2009;2009;2009;2009;2009	Not Available	NOT HISPANIC OR LATINO	TCGA-25-2042-F26785	67cbdcbf-2e6a-4de9-9658-9bbd8ae0f47f
TCGA-24-2280	FEMALE	2143	Serous Cystadenocarcinoma	Ovary	Alive	Stage IIIC	G3	1	535		Recurrence	WITH TUMOR		74	Bilateral	TCGA-24-2280	97ad0360-3be4-401a-a94c-7f2800a1b519	5	-27356	Not Applicable	0	2143	TCGA-24-2280-D26562;TCGA-24-2280-D26565;TCGA-24-2280-D26568;TCGA-24-2280-D26567;TCGA-24-2280-D26563;TCGA-24-2280-D26564;TCGA-24-2280-D26566	9c3be379-ed37-4783-be42-e672ea742981;4f041d9d-20ed-4b8c-b24e-f02931809265;d053512b-b2e1-474b-8f28-2aca5360d223;d4c1aa33-8106-4504-b217-27a2fb6accfc;2b16b758-e19d-49e6-9459-6aff9e5f60c5;56d3c465-44f3-4e81-8160-e949e0ad7d63;ea7b837d-bd0d-492e-a86c-465e4bf2be80	Not Available;Not Available;Not Available;Not Available;Not Available;Not Available;Not Available	5;5;5;5;5;5;5	178;766;1025;1025;178;178;1025	17;538;906;906;17;17;906	Taxol;Doxil;Avastin;Carboplatin;Carboplatin;Doxil;Taxotere	Not Available;Not Available;Not Available;Not Available;Not Available;Not Available;Not Available	4;4;4;4;4;4;4	08;08;Not Available;06;08;08;06	Not Available;Not Available;Not Available;Not Available;Not Available;Not Available;Not Available	mg;mg;mg;mg;mg;mg;mg	ADJUVANT;RECURRENCE;PROGRESSION;PROGRESSION;ADJUVANT;ADJUVANT;PROGRESSION	Not Applicable;Not Applicable;Not Applicable;Not Applicable;Not Applicable;Not Applicable;Not Applicable	Not Available;Not Available;Not Available;Not Available;Not Available;Not Available;Not Available	IV;IV;Not Available;IV;IV;IV;IV	NO;NO;NO;NO;NO;NO;NO	Chemotherapy;Chemotherapy;Targeted Molecular therapy;Chemotherapy;Chemotherapy;Chemotherapy;Chemotherapy	Not Available;Not Available;Not Available;Not Available;Not Available;Not Available;Not Available	2248;478;57.5;2882;4240;192;599	mg;mg;mg;mg;mg;mg;mg	Not Available;Not Available;Not Available;Not Available;Not Available;Not Available;Not Available	2010;2010;2010;2010;2010;2010;2010	0	Not Available	TCGA-24-2280-F26561	c813bb0e-af6a-403d-a7b5-f3561ccc6326
TCGA-13-0793	FEMALE	3263	Serous Cystadenocarcinoma	Ovary	Alive	Stage IV	G3	1	351		Recurrence	WITH TUMOR		40	Left	TCGA-13-0793	5e90e1ed-cbfd-44ba-a6ff-63ff576b3c73	24	-14708	Not Applicable	0	873	TCGA-13-0793-D24596;TCGA-13-0793-D24595;TCGA-13-0793-D24594	3a56ec6c-8b7f-482d-b6b0-4d64e56a91e4;12f8b3a0-deed-409d-8434-0c0a13501dc7;75b465bb-15eb-4d7f-8398-3c39d9ada2c0	Not Available;Not Available;Not Available	15;15;15	362;159;159	200;47;47	Abagovomab or Placebo;Paclitaxel;Carboplatin	Not Available;Not Available;Not Available	4;4;4	Not Available;6;6	Not Available;Not Available;Not Available	mg;mg/m2;Not Available	ADJUVANT;ADJUVANT;ADJUVANT	Not Applicable;Not Applicable;Not Applicable	Not Available;Not Available;Not Available	Not Available;IV;IV	Not Available;NO;Not Available	Immunotherapy;Chemotherapy;Chemotherapy	Not Available;Not Available;Not Available	2;175;Not Available	mg;mg/m2;Not Available	Not Available;Not Available;Not Available	2009;2009;2009	Not Available	NOT HISPANIC OR LATINO	TCGA-13-0793-F24593;TCGA-13-0793-F72606	a19d6f1b-9782-4721-89d1-65d0aaf06ea7;6871EB4A-AD29-4467-88E6-14031C7FFCA6
TCGA-04-1365	FEMALE	947	Serous Cystadenocarcinoma	Ovary	Alive	Stage IIIB	G3	1	947		Recurrence	WITH TUMOR		87	Left	TCGA-04-1365	0484a929-7a7f-4926-8d25-470ddab082ec	26	-31925	Not Applicable	0	947	TCGA-04-1365-D24046;TCGA-04-1365-D24050;TCGA-04-1365-D24048;TCGA-04-1365-D24047;TCGA-04-1365-D24045;TCGA-04-1365-D24049	e830225c-50d9-49db-9d48-4186bbc20fd6;94df838e-3175-48e9-9671-4922ad649d5f;dd8b96a9-d738-4494-aec8-a4892eb9ba68;1d817f79-6e5a-4729-857d-41100fd09200;90c97127-c03c-4650-9dce-516d12af44d2;c7f23742-9c3b-4bef-ad13-5888915ae592	Not Available;Not Available;Not Available;Not Available;Not Available;Not Available	24;24;24;24;24;24	189;947;947;947;189;947	21;947;947;947;21;947	Carboplatin;Carboplatin;Carboplatin;Carboplatin;Gemcitabine;Carboplatin	Not Available;Not Available;Not Available;Not Available;Not Available;Not Available	11;11;11;11;11;11	8;1;4;6;8;2	Not Available;Not Available;Not Available;Not Available;Not Available;Not Available	AUC;Not Available;AUC;AUC;mg;AUC	ADJUVANT;PROGRESSION;PROGRESSION;PROGRESSION;ADJUVANT;PROGRESSION	Not Applicable;Not Applicable;Not Applicable;Not Applicable;Not Applicable;Not Applicable	Not Available;Not Available;Not Available;Not Available;Not Available;Not Available	IV;IV;IV;IV;IV;IV	NO;NO;NO;NO;NO;NO	Chemotherapy;Chemotherapy;Chemotherapy;Chemotherapy;Chemotherapy;Chemotherapy	Not Available;Not Available;Not Available;Not Available;Not Available;Not Available	6;Not Available;5;5;11760;4	AUC;Not Available;AUC;AUC;mg;AUC	Not Available;Not Available;Not Available;Not Available;Not Available;Not Available	2009;2009;2009;2009;2009;2009	1	NOT HISPANIC OR LATINO	TCGA-04-1365-F24044	5342e1bf-6201-45cf-8499-dc41206e4420
TCGA-24-2254	FEMALE	1736	Serous Cystadenocarcinoma	Ovary	Dead	Stage IIIC	G3	1	606		Recurrence	WITH TUMOR		66	Bilateral	TCGA-24-2254	9af2248a-d86a-4277-93b4-8eba5a39bd3c	19	-24407	1736	0	1736	TCGA-24-2254-D26529;TCGA-24-2254-D26528;TCGA-24-2254-D26525;TCGA-24-2254-D26524;TCGA-24-2254-D26526;TCGA-24-2254-D26527;TCGA-24-2254-D26530	82cbc27a-6761-4f89-b883-f8421831e315;f2497656-b837-4017-8ab0-97d93059374a;a12fb8d1-7f50-472a-800a-53b1adcdb84d;ef5ca1b9-d193-4a6f-bce0-d480174dd9c7;0362e136-d6c8-4db8-93b0-f02785a3ccee;2bf84b24-19c6-4b84-8e8e-c27da4acf2db;384a517f-ad06-41c1-80f4-3469584c01cf	Not Available;Not Available;Not Available;Not Available;Not Available;Not Available;Not Available	19;19;19;19;19;19;19	1112;718;165;165;165;718;1112	984;615;17;17;17;615;984	Gemzar;Carboplatin;Doxil;Taxol;Carboplatin;Taxotere;Carboplatin	Not Available;Not Available;Not Available;Not Available;Not Available;Not Available;Not Available	2;2;2;2;2;2;2	06;06;08;08;08;06;06	Not Available;Not Available;Not Available;Not Available;Not Available;Not Available;Not Available	mg;mg;mg;mg;mg;mg;mg	RECURRENCE;RECURRENCE;ADJUVANT;ADJUVANT;ADJUVANT;RECURRENCE;RECURRENCE	Not Applicable;Not Applicable;Not Applicable;Not Applicable;Not Applicable;Not Applicable;Not Applicable	Not Available;Not Available;Not Available;Not Available;Not Available;Not Available;Not Available	IV;IV;IV;IV;IV;IV;IV	NO;NO;NO;NO;NO;NO;NO	Chemotherapy;Chemotherapy;Chemotherapy;Chemotherapy;Chemotherapy;Chemotherapy;Chemotherapy	Not Available;Not Available;Not Available;Not Available;Not Available;Not Available;Not Available	16000;2765;233;2717;3000;780;4630	mg;mg;mg;mg;mg;mg;mg	Not Available;Not Available;Not Available;Not Available;Not Available;Not Available;Not Available	2010;2010;2010;2010;2010;2010;2010	0	Not Available	TCGA-24-2254-F26523	096da4d1-b2b5-4325-b786-ed88b37ba349
TCGA-13-0921	FEMALE	1483	Serous Cystadenocarcinoma	Ovary	Dead	Stage IIIC	G3	0	1483			TUMOR FREE		72	Bilateral	TCGA-13-0921	31b997dd-aaea-4003-a64d-11d3e19b0bbc	25	-26606	Not Applicable	0	141	TCGA-13-0921-D24779;TCGA-13-0921-D24780	63fc0d14-1978-464b-b001-b72b7cc526f7;fa9ca8bd-dc3a-44e7-8853-e0d8147cb914	Not Available;Not Available	16;16	140;140	35;35	Cisplatin;Paclitaxel	Not Available;Not Available	4;4	6;6	Not Available;Not Available	Not Available;Not Available	ADJUVANT;ADJUVANT	Not Applicable;Not Applicable	Not Available;Not Available	IP;IV;IP;IV	Not Available;Not Available	Chemotherapy;Chemotherapy	Not Available;Not Available	Not Available;Not Available	Not Available;Not Available	Not Available;Not Available	2009;2009	Not Available	NOT HISPANIC OR LATINO	TCGA-13-0921-F24778;TCGA-13-0921-F72634	cf7eb88e-6c76-400b-8ad2-7e85d16f6fcc;7F676671-5968-4115-98B2-C27DEF2D15B1
TCGA-36-1580	FEMALE	737	Serous Cystadenocarcinoma	Ovary	Dead	Stage IIIC	G3	1	440		Recurrence	WITH TUMOR		82	Not Available	TCGA-36-1580	533f5ff9-466c-4cdb-9c46-b841c2626775	2	-29992	737	0	737	TCGA-36-1580-D27891;TCGA-36-1580-D27890	e781ca54-c93a-4270-99d5-4d97f278b1f6;9fd38eaf-a33b-4dc5-9d51-7f07a8c2f098	Not Available;Not Available	15;15	348;553	18;454	Carboplatin;Liposomal Doxorubicin	Not Available;Not Available	1;1	11;04	Not Available;Not Available	mg;mg	ADJUVANT;PROGRESSION	Not Applicable;Not Applicable	Not Available;Not Available	IV;IV	NO;NO	Chemotherapy;Chemotherapy	Not Available;Not Available	4796;222	mg;mg	Not Available;Not Available	2010;2010	1	Not Available	TCGA-36-1580-F27889	0a7f42d0-c9d3-4d5c-8122-53760a34e6e1
TCGA-61-2101	FEMALE	1688	Serous Cystadenocarcinoma	Ovary	Dead	Stage IIIC	G2	0	1688			WITH TUMOR		55	Bilateral	TCGA-61-2101	5d1a54fe-e0df-4c17-b623-b649a136dc82	7	-20287	1688	0	Not Available	TCGA-61-2101-D28423;TCGA-61-2101-D28425;TCGA-61-2101-D28429;TCGA-61-2101-D28433;TCGA-61-2101-D28432;TCGA-61-2101-D28430;TCGA-61-2101-D28424;TCGA-61-2101-D28427;TCGA-61-2101-D28431;TCGA-61-2101-D28426;TCGA-61-2101-D28434;TCGA-61-2101-D28428	48ba6dc6-f632-4dce-b86d-ff727f1251b3;a9ae8b0a-2427-4bb0-82c6-ee9668363f5f;f557ab9d-8841-415f-a81a-2986f12eb545;b3ae2276-2ab9-4b82-bc5e-83f7143af1ea;bb3e3e24-b6db-4a5c-ae01-b27ab1c1628c;a0365ba7-19d8-4ea4-9b7a-ce9c9cf90d23;a17b6920-5a05-4657-a3ee-1dafc0f723e7;119e9ed1-a261-483a-a7bf-34bcece33123;ad0029f1-24b5-490c-b5e2-56e03495b8a3;395d5771-ffed-491a-baa5-f715fb8fbd06;e2b74437-6a3e-4db1-ba77-7c66d…	Not Available;Not Available;Not Available;Not Available;Not Available;Not Available;Not Available;Not Available;Not Available;Not Available;Not Available;Not Available	7;7;7;7;7;7;7;7;7;7;7;7	117;221;Not Available;Not Available;Not Available;Not Available;117;Not Available;Not Available;221;Not Available;Not Available	2;152;1103;1251;1220;1159;2;733;1190;152;1129;733	Taxol;Taxol;Doxil;VP 16;Doxil;Hexalen;Cisplatin;Gemcitabine;Gemzar;Carboplatin;IL 12;Hexalin	Not Available;Not Available;Not Available;Not Available;Not Available;Not Available;Not Available;Not Available;Not Available;Not Available;Not Available;Not Available	12;12;12;12;12;12;12;12;12;12;12;12	06;04;Not Available;Not Available;Not Available;Not Available;06;Not Available;Not Available;04;Not Available;Not Available	Not Available;Not Available;Not Available;Not Available;Not Available;Not Available;Not Available;Not Available;Not Available;Not Available;Not Available;Not Available	mg;mg;Not Available;Not Available;Not Available;Not Available;mg;mg;Not Available;mg;mg/kg;mg	ADJUVANT;ADJUVANT;PROGRESSION;PROGRESSION;PROGRESSION;PROGRESSION;ADJUVANT;PROGRESSION;PROGRESSION;ADJUVANT;PROGRESSION;PROGRESSION	Not Applicable;Not Applicable;Not Applicable;Not Applicable;Not Applicable;Not Applicable;Not Applicable;Not Applicable;Not Applicable;Not Applicable;Not Applicable;Not Applicable	Not Available;Not Available;Not Available;Not Available;Not Available;Not Available;Not Available;Not Available;Not Available;Not Available;Not Available;Not Available	IV;IV;Not Available;Not Available;Not Available;Not Available;IV;Not Available;Not Available;IV;IP;Not Available	NO;NO;NO;NO;NO;NO;NO;NO;NO;NO;NO;NO	Chemotherapy;Chemotherapy;Chemotherapy;Chemotherapy;Chemotherapy;Chemotherapy;Chemotherapy;Chemotherapy;Chemotherapy;Chemotherapy;Immunotherapy;Chemotherapy	Not Available;Not Available;Not Available;Not Available;Not Available;Not Available;Not Available;Not Available;Not Available;Not Available;Not Available;Not Available	1800;1200;Not Available;Not Available;Not Available;Not Available;762;1420;Not Available;3050;300;800	mg;mg;Not Available;Not Available;Not Available;Not Available;mg;mg;Not Available;mg;mg/kg;mg	Not Available;Not Available;Not Available;Not Available;Not Available;Not Available;Not Available;Not Available;Not Available;Not Available;Not Available;Not Available	2009;2009;2009;2009;2009;2009;2009;2009;2009;2009;2009;2009	0	NOT HISPANIC OR LATINO	TCGA-61-2101-F28422	d25c7ceb-de04-4a5b-87e1-8c217938de7d
TCGA-24-1567	FEMALE	524	Serous Cystadenocarcinoma	Ovary	Dead	Stage IIIB	G3	1	319		Recurrence	WITH TUMOR		54	Bilateral	TCGA-24-1567	2cb50c2d-e749-4172-b101-d975507435c5	2	-19843	524	0	524	TCGA-24-1567-D26281;TCGA-24-1567-D26282;TCGA-24-1567-D26280	f43d1ffa-d988-4cc3-acfd-7e4947d8ced1;31ebe1d0-b99f-4a7e-8abb-aa91ab2aec48;37c78ac7-dfc0-49fd-903a-05a2a8300aef	Not Available;Not Available;Not Available	24;24;24	153;Not Available;153	41;Discrepancy;41	Carboplatin;Topecan;Taxol	Not Available;Not Available;Not Available	7;7;7	6;Not Available;6	Not Available;Not Available;Not Available	Not Available;Not Available;Not Available	ADJUVANT;RECURRENCE;ADJUVANT	Not Applicable;Not Applicable;Not Applicable	Not Available;Not Available;Not Available	IV;IV;IV	NO;Not Available;NO	Chemotherapy;Chemotherapy;Chemotherapy	Not Available;Not Available;Not Available	Not Available;Not Available;Not Available	Not Available;Not Available;Not Available	Not Available;Not Available;Not Available	2009;2009;2009	Not Available	Not Available	TCGA-24-1567-F26279	282f1e10-3acf-4ade-bf0f-83cf6b487059
TCGA-29-1781	FEMALE	255	Serous Cystadenocarcinoma	Ovary	Alive	Stage IIIC	G3	0	255			TUMOR FREE		69	Bilateral	TCGA-29-1781	f6ebf3a7-31c6-4f4c-9a0b-74cf35bfedf6	2	-25404	Not Applicable	0	255	TCGA-29-1781-D27428;TCGA-29-1781-D27429	cf2a312b-1bea-47bb-8927-fec695033234;ca447e99-c2a8-46bb-a4db-19480aae1034	Not Available;Not Available	10;10	255;255	52;52	Carboplatin;Paclitaxel	Not Available;Not Available	12;12	06;06	Not Available;Not Available	mg;mg	ADJUVANT;ADJUVANT	Not Applicable;Not Applicable	Not Available;Not Available	IV;IV	NO;NO	Chemotherapy;Chemotherapy	Not Available;Not Available	2970;2322	mg;mg	Not Available;Not Available	2009;2009	1	Not Available	TCGA-29-1781-F27427	1b223132-ee30-413c-b80b-15986f45f9a3
TCGA-23-1113	FEMALE	949	Serous Cystadenocarcinoma	Ovary	Dead	Stage IV	G3	0	949			WITH TUMOR		48	Left	TCGA-23-1113	6209e80d-a115-4f8e-bf0d-18461401a1c6	19	-17791	949	0	Not Available	TCGA-23-1113-D25678;TCGA-23-1113-D25681;TCGA-23-1113-D25683;TCGA-23-1113-D25679;TCGA-23-1113-D25680;TCGA-23-1113-D25682	a3b52bce-08d8-456b-8f1e-d68fb5b21ef7;8c3b8e3e-b95c-467c-acdf-7734757cc2e3;0e6ed55a-1671-4de0-92bb-1f511b80c3d6;ad1b6d9d-88c5-4a21-a3d5-485738b49d45;26c1331d-7f91-47a7-996d-d19bdc7a1244;d6010400-23c3-4365-a990-0aa37395b0fa	Not Available;Not Available;Not Available;Not Available;Not Available;Not Available	27;27;27;27;27;27	74;187;873;74;187;253	27;102;253;27;102;225	Carboplatin;Cisplatin;Docetaxel;Paclitaxel;Gemcitabine;Doxorubicin	Not Available;Not Available;Not Available;Not Available;Not Available;Not Available	3;3;3;3;3;3	3;4;9;3;4;12	Not Available;Not Available;Not Available;Not Available;Not Available;Not Available	mg;mg;mg;mg;mg;mg	ADJUVANT;ADJUVANT;PROGRESSION;ADJUVANT;ADJUVANT;PROGRESSION	Not Applicable;Not Applicable;Not Applicable;Not Applicable;Not Applicable;Not Applicable	Not Available;Not Available;Not Available;Not Available;Not Available;Not Available	IV;IV;IV;IV;IV;IV	NO;NO;NO;NO;NO;NO	Chemotherapy;Chemotherapy;Chemotherapy;Chemotherapy;Chemotherapy;Chemotherapy	Not Available;Not Available;Not Available;Not Available;Not Available;Not Available	1650;528;910;870;11282;816	mg;mg;mg;mg;mg;mg	Not Available;Not Available;Not Available;Not Available;Not Available;Not Available	2009;2009;2009;2009;2009;2009	Not Available	NOT HISPANIC OR LATINO	TCGA-23-1113-F25677	8f74e7a1-1849-44b8-8387-31bff5e4bfb7
TCGA-42-2588	FEMALE	880	Serous Cystadenocarcinoma	Ovary	Dead	Stage IV	G3	1	112		Progression of Disease	WITH TUMOR		61	Bilateral	TCGA-42-2588	654d02ab-05b4-4863-99d9-04d087ff91b4	3	-22377	Not Applicable	0	287	TCGA-42-2588-D28043;TCGA-42-2588-D28042;TCGA-42-2588-D28041;TCGA-42-2588-D28040;TCGA-42-2588-D28833;TCGA-42-2588-D28825;TCGA-42-2588-D28827;TCGA-42-2588-D28822;TCGA-42-2588-D28826;TCGA-42-2588-D28824;TCGA-42-2588-D28937;TCGA-42-2588-D28834;TCGA-42-2588-D28831	2c83e6ca-240b-4be5-b796-006d114d3975;b4616f91-0148-4e23-8b9d-ab3fd76760d7;ad0e141f-2887-4cee-9a89-8172ebda8ce7;06643023-c853-4442-ba1b-5cd6259c1b6b;d04a7679-dc92-4c44-8f30-ad96ecf65f2c;800d12e7-9f55-4e4a-80b4-0d6d58cca353;575215c3-b906-40ca-a891-4f6663e92d32;1d0588af-256c-45d7-b974-d57254093ea4;c56b5635-c884-4eba-be7b-af5898e3ce77;30c139f2-e12d-4ed8-a1b3-31fc9eb5bb59;74BDD96A-B5A2-41A7-926D-5F074…	Not Available;Not Available;Not Available;Not Available;Not Available;Not Available;Not Available;Not Available;Not Available;Not Available;Not Available;Not Available;Not Available	3;3;3;3;26;26;26;26;26;26;26;26;26	258;258;90;104;819;427;602;399;595;399;784;819;784	161;161;22;48;735;427;427;315;455;343;687;744;687	Carboplatin;Taxol;Carboplatin;Taxol;Gemcitabine;Cisplatin;Gemcitabine;Doxil;Carboplatin;Avastin;Megestrol Acetate;Carboplatin;Femara	Not Available;Not Available;Not Available;Not Available;Not Available;Not Available;Not Available;Not Available;Not Available;Not Available;Not Available;Not Available;Not Available	6;6;6;6;1;1;1;1;1;1;1;1;1	4;04;4;3;04;01;08;04;07;03;1;04;Not Available	590;97;558;137;675;72;621;60;266;747;400;300;2.5	mg;mg;mg;mg;mg;mg;mg;mg;mg;mg;mg;mg;mg	PROGRESSION;PROGRESSION;ADJUVANT;ADJUVANT;PROGRESSION;PROGRESSION;PROGRESSION;PROGRESSION;PROGRESSION;PROGRESSION;PROGRESSION;PROGRESSION;PROGRESSION	Not Applicable;Not Applicable;Not Applicable;Not Applicable;Not Applicable;Not Applicable;Not Applicable;Not Applicable;Not Applicable;Not Applicable;Not Applicable;Not Applicable;Not Applicable	Not Available;Not Available;Not Available;Not Available;06;04;04;03;04;03;05;06;05	IP;IV;IV;IV;IV;IV;IV;IV;IV;IV;PO;IV;PO	NO;NO;NO;NO;NO;NO;NO;NO;NO;NO;NO;NO;NO	Chemotherapy;Chemotherapy;Chemotherapy;Chemotherapy;Chemotherapy;Chemotherapy;Chemotherapy;Chemotherapy;Chemotherapy;Targeted Molecular therapy;Hormone Therapy;Chemotherapy;Hormone Therapy	Not Available;Not Available;Not Available;Not Available;Not Available;Not Available;Not Available;Not Available;Not Available;Not Available;Not Available;Not Available;Not Available	2360;1146;2169;948;4881;72;10302;248;1862;2323;39200;1203;245	mg;mg;mg;mg;mg;mg;mg;mg;mg;mg;mg;mg;mg	Not Available;Not Available;Not Available;Not Available;Not Available;Not Available;Not Available;Not Available;Not Available;Not Available;Not Available;Not Available;Not Available	2010;2010;2010;2010;2012;2012;2012;2012;2012;2012;2012;2012;2012	2	NOT HISPANIC OR LATINO	TCGA-42-2588-F28039;TCGA-42-2588-F28821	3e3af7ca-94f5-4761-9790-5c81d0ada2a6;32c5dbaa-fb36-4b5b-9cd2-387c31275f16
TCGA-24-1422	FEMALE	23	Serous Cystadenocarcinoma	Ovary	Dead	Stage IIIC	G3	0	23			Not Available		82	Bilateral	TCGA-24-1422	05ba5839-e00a-4a9e-8ba3-ecb490781e62	16	-30234	23	0	23																								Not Available	Not Available	TCGA-24-1422-F25934	53ee42c9-00e7-4df7-9070-362b248e998a
TCGA-04-1331	FEMALE	1336	Serous Cystadenocarcinoma	Ovary	Dead	Stage IIIC	G3	1	459		Recurrence	WITH TUMOR		78	Bilateral	TCGA-04-1331	6d10d4ee-6331-4bba-93bc-a7b64cc0b22a	26	-28848	1336	0	1224	TCGA-04-1331-D23907;TCGA-04-1331-D23909;TCGA-04-1331-D23908	f4aaacc4-22bc-4b11-9987-42a72560fe95;8248d776-145a-4301-8d69-09567aedcf3d;0debc4f0-665e-47b4-880c-d732d3897ea2	Not Available;Not Available;Not Available	10;10;10	169;498;169	36;481;36	Taxol;Velcade;Carboplatin	Not Available;Not Available;Not Available	11;11;11	06;Not Available;06	Not Available;Not Available;Not Available	mg;mg;mg	ADJUVANT;RECURRENCE;ADJUVANT	Not Applicable;Not Applicable;Not Applicable	Not Available;Not Available;Not Available	IV;Not Available;IV	NO;NO;NO	Chemotherapy;Targeted Molecular therapy;Chemotherapy	Not Available;Not Available;Not Available	1650;4.4;455	mg;mg;mg	Not Available;Not Available;Not Available	2009;2009;2009	Not Available	NOT HISPANIC OR LATINO	TCGA-04-1331-F23906	301b373d-8abe-471e-8805-51bcf72a4fc2
TCGA-24-1424	FEMALE	183	Serous Cystadenocarcinoma	Ovary	Alive	Stage IIIC	G3	0	183			TUMOR FREE		67	Bilateral	TCGA-24-1424	c3e443b9-5dc5-4793-91e3-534f21485268	16	-24545	Not Applicable	0	183	TCGA-24-1424-D25942;TCGA-24-1424-D25943;TCGA-24-1424-D25944	763af0d0-0624-41b1-bd45-20ace6a3e7c8;528aaae9-7fb0-4b0e-a7c6-1492c1d7808f;2d84d139-9b11-4149-96e4-346b15bfdf3e	Not Available;Not Available;Not Available	16;16;16	120;120;120	8;8;8	Carboplatin;Paclitaxel;Docetaxel	Not Available;Not Available;Not Available	4;4;4	06;06;06	Not Available;Not Available;Not Available	mg;mg;mg	ADJUVANT;ADJUVANT;ADJUVANT	Not Applicable;Not Applicable;Not Applicable	Not Available;Not Available;Not Available	IV;IV;IV	NO;NO;NO	Chemotherapy;Chemotherapy;Chemotherapy	Not Available;Not Available;Not Available	1441;972;429	mg;mg;mg	Not Available;Not Available;Not Available	2009;2009;2009	Not Available	Not Available	TCGA-24-1424-F25941	8c85cbc9-0f48-4310-ab56-f53b981e1ee6
TCGA-13-1411	FEMALE	531	Serous Cystadenocarcinoma	Ovary	Dead	Stage IIIC	G3	1	238			WITH TUMOR		81	Not Available	TCGA-13-1411	a9d3a7b0-faf8-4e56-8600-d9e6882a4f23	20	-29874	Not Applicable	0	128	TCGA-13-1411-D24829;TCGA-13-1411-D24830	97303643-4e4a-41e8-b679-e3bfef06de2e;b3cf475f-ff22-4efe-a7a9-8909dff55877	Not Available;Not Available	30;30	128;128	8;8	Carboplatin;Paclitaxel	Not Available;Not Available	6;6	6;6	Not Available;Not Available	Not Available;mg/m2	ADJUVANT;ADJUVANT	Not Applicable;Not Applicable	Not Available;Not Available	IV;IV	NO;NO	Chemotherapy;Chemotherapy	Not Available;Not Available	5;175	Not Available;mg/m2	Not Available;Not Available	2009;2009	Not Available	NOT HISPANIC OR LATINO	TCGA-13-1411-F24828;TCGA-13-1411-F72662	aea78ebe-c26b-47e2-a50f-000c9e792fa0;5E4A0AA1-D236-462C-BE4B-3F52CB5A7C4F
TCGA-13-0760	FEMALE	351	Serous Cystadenocarcinoma	Ovary	Dead	Stage IV	G3	0	351			Not Available		63	Bilateral	TCGA-13-0760	d8d13aa4-45d5-4e1a-a6cf-895bdf05e7b2	24	-23036	351	0	351																								Not Available	NOT HISPANIC OR LATINO	TCGA-13-0760-F24543	3203ab30-8200-473e-ac09-004d20628514
TCGA-25-1627	FEMALE	394	Serous Cystadenocarcinoma	Ovary	Dead	Stage IIIC	G3	0	394			Not Available		73	Bilateral	TCGA-25-1627	cbe3309e-9b7b-4f62-87b5-0f5ed4218ada	2	-26784	394	0	11																								Not Available	NOT HISPANIC OR LATINO	TCGA-25-1627-F26722	20c8251e-9302-47d0-b9fa-9e915447bc3d
TCGA-29-2435	FEMALE	34	Serous Cystadenocarcinoma	Ovary	Alive	Stage IV	G3	0	34			Not Available		78	Left	TCGA-29-2435	8fa35df3-f544-4c47-bdd1-e4d6fc6662be	7	-28779	Not Applicable	0	34	TCGA-29-2435-D27511;TCGA-29-2435-D27512	4b060dcb-322a-4357-b030-8cbe7307bc71;9d87155a-3587-4120-8dd9-6703aa7a39c4	Not Available;Not Available	7;7	Not Available;Not Available	30;30	Carboplatin;Paclitaxel	Not Available;Not Available	6;6	Not Available;Not Available	Not Available;Not Available	Not Available;Not Available	ADJUVANT;ADJUVANT	Not Applicable;Not Applicable	Not Available;Not Available	IV;IV	NO;NO	Chemotherapy;Chemotherapy	Not Available;Not Available	Not Available;Not Available	Not Available;Not Available	Not Available;Not Available	2010;2010	Not Available	Not Available	TCGA-29-2435-F27510	7e45664f-cd17-468b-a8c8-fdb76b752062
TCGA-24-1842	FEMALE	253	Serous Cystadenocarcinoma	Ovary	Alive	Stage IIIC	G3	0	253			TUMOR FREE		49	Bilateral	TCGA-24-1842	09c77947-a333-4392-b18d-a6c1f08764a1	2	-18227	Not Applicable	0	253	TCGA-24-1842-D26328;TCGA-24-1842-D26326;TCGA-24-1842-D26327	df6ea24c-564d-43a8-adf8-78174c16894c;7171dab9-2b07-41ce-92ac-dda733de4616;740a180c-a931-483e-be25-7580f2c5f4e9	Not Available;Not Available;Not Available	24;24;24	253;253;253	43;24;24	Bevacizumiab/ versus Placebo;Carboplatin;Paclitaxel	Not Available;Not Available;Not Available	8;8;8	Not Available;06;06	Not Available;Not Available;Not Available	mg;mg;mg	ADJUVANT;ADJUVANT;ADJUVANT	Not Applicable;Not Applicable;Not Applicable	Not Available;Not Available;Not Available	Not Available;IV;IV	NO;NO;NO	Targeted Molecular therapy;Chemotherapy;Chemotherapy	Not Available;Not Available;Not Available	14331;4355;2043	mg;mg;mg	Not Available;Not Available;Not Available	2009;2009;2009	0	Not Available	TCGA-24-1842-F26325	ea813aa8-df86-407b-aea1-092fb2c8608e
TCGA-36-1570	FEMALE	655	Serous Cystadenocarcinoma	Ovary	Alive	Stage IIIC	G3	1	375		Recurrence	WITH TUMOR		49	Bilateral	TCGA-36-1570	0f530b3e-5b6d-4892-9ebd-9138d76fdca7	2	-17956	Not Applicable	0	655	TCGA-36-1570-D27858;TCGA-36-1570-D27860;TCGA-36-1570-D27859	1ab5a040-88b7-41b1-a6ee-4bbb809a9b42;90a5225e-1532-4db6-aef6-b5596c72151e;630cd072-7436-4d96-9eeb-af8fcd0dcd9b	Not Available;Not Available;Not Available	15;15;15	133;432;133	23;432;23	Carboplatin;Gemcitabine;Paclitaxel	Not Available;Not Available;Not Available	1;1;1	05;01;05	Not Available;Not Available;Not Available	mg;mg;mg	ADJUVANT;RECURRENCE;ADJUVANT	Not Applicable;Not Applicable;Not Applicable	Not Available;Not Available;Not Available	IV;IV;IV	NO;NO;NO	Chemotherapy;Chemotherapy;Chemotherapy	Not Available;Not Available;Not Available	2808;1200;1330	mg;mg;mg	Not Available;Not Available;Not Available	2010;2010;2010	0	Not Available	TCGA-36-1570-F27857	15fa99c0-2fe6-4a73-9c6b-612cf8d56d53
TCGA-13-2061	FEMALE	2339	Serous Cystadenocarcinoma	Ovary	Alive	Stage IIIC	G3	0	2339			TUMOR FREE		58	Bilateral	TCGA-13-2061	a22c1451-7841-4fa3-b2f2-5d5cd8aa67d3	1	-21543	Not Applicable	0	328	TCGA-13-2061-D25007;TCGA-13-2061-D25009;TCGA-13-2061-D25010;TCGA-13-2061-D25005;TCGA-13-2061-D25004;TCGA-13-2061-D25008;TCGA-13-2061-D25011;TCGA-13-2061-D25006	ee41741e-220a-4998-a17d-e0b871f7eb88;24744559-e344-4016-8695-c4b55f3cd1cb;929e7c01-97cc-47d1-bcf0-6b3f02535241;df08b0fe-5176-4c16-80b1-2f2f54bbfe8e;99777074-d6b2-4ece-ae49-81c07c9a25aa;12097149-87dd-4fa1-8f0d-5088a4c8062a;ba1d69c2-a882-4e82-b282-25f168fbcdf9;728138db-9e40-4995-af75-4b90bfd5d6a7	Not Available;Not Available;Not Available;Not Available;Not Available;Not Available;Not Available;Not Available	1;1;1;1;1;1;1;1	133;133;168;112;112;133;168;112	126;126;147;63;63;126;147;63	Carboplatin;Paclitaxel;Carboplatin;Paclitaxel;Cisplatin;Paclitaxel;Paclitaxel;Paclitaxel	Not Available;Not Available;Not Available;Not Available;Not Available;Not Available;Not Available;Not Available	2;2;2;2;2;2;2;2	1;1;2;3;3;1;2;3	Not Available;Not Available;Not Available;Not Available;Not Available;Not Available;Not Available;Not Available	AUC;mg/m2;Not Available;mg/m2;mg/m2;mg/m2;mg/m2;mg/m2	ADJUVANT;ADJUVANT;ADJUVANT;ADJUVANT;ADJUVANT;ADJUVANT;ADJUVANT;ADJUVANT	Not Applicable;Not Applicable;Not Applicable;Not Applicable;Not Applicable;Not Applicable;Not Applicable;Not Applicable	Not Available;Not Available;Not Available;Not Available;Not Available;Not Available;Not Available;Not Available	IP;IP;IV;IV;IP;IV;IV;IP	NO;NO;NO;NO;NO;NO;NO;NO	Chemotherapy;Chemotherapy;Chemotherapy;Chemotherapy;Chemotherapy;Chemotherapy;Chemotherapy;Chemotherapy	Not Available;Not Available;Not Available;Not Available;Not Available;Not Available;Not Available;Not Available	4;Not Available;Not Available;Not Available;Not Available;Not Available;Not Available;Not Available	AUC;mg/m2;Not Available;mg/m2;mg/m2;mg/m2;mg/m2;mg/m2	Not Available;Not Available;Not Available;Not Available;Not Available;Not Available;Not Available;Not Available	2010;2010;2010;2010;2010;2010;2010;2010	Not Available	NOT HISPANIC OR LATINO	TCGA-13-2061-F25003;TCGA-13-2061-F72686	ee9b0f94-0f32-4777-ba2e-56f6abd2c7bb;F556FD4C-0279-488E-A662-D6F0E94E2DAA
TCGA-13-0920	FEMALE	1484	Serous Cystadenocarcinoma	Ovary	Dead	Stage IIIC	G3	1	297		Recurrence	WITH TUMOR		65	Bilateral	TCGA-13-0920	85a85a11-7200-4e96-97af-6ba26d680d59	25	-24064	Not Applicable	0	420	TCGA-13-0920-D24776	7886c638-9120-43dc-a93d-657bae62d49d	Not Available	16	151	Not Available	Carboplatin	Not Available	4	Not Available	Not Available	Not Available	ADJUVANT	Not Applicable	Not Available	IV	Not Available	Chemotherapy	Not Available	Not Available	Not Available	Not Available	2009	Not Available	NOT HISPANIC OR LATINO	TCGA-13-0920-F24775;TCGA-13-0920-F72633	7520c61e-b168-410f-9eeb-cda2deaed2a7;CBC19D48-E58F-4218-90A5-AFCA7A957A8C
TCGA-04-1542	FEMALE	2561	Serous Cystadenocarcinoma	Ovary	Dead	Stage IIIB	G2	1	1020		Recurrence	WITH TUMOR		52	Bilateral	TCGA-04-1542	0c1a2e7d-e7e4-481e-a012-ef214c444497	2	-19263	2561	0	Not Available	TCGA-04-1542-D24119;TCGA-04-1542-D24126;TCGA-04-1542-D24120;TCGA-04-1542-D24124;TCGA-04-1542-D24133;TCGA-04-1542-D24123;TCGA-04-1542-D24130;TCGA-04-1542-D24131;TCGA-04-1542-D24121;TCGA-04-1542-D24129;TCGA-04-1542-D24127;TCGA-04-1542-D24128;TCGA-04-1542-D24134;TCGA-04-1542-D24132;TCGA-04-1542-D24122;TCGA-04-1542-D24125	ba72049a-201d-41b9-8de5-836bdcfffe5d;232608ab-c0eb-4ce7-b90f-500736a7b355;d5500c2d-df88-43c8-bcff-c3a415ef606f;20d4ef39-b4e4-4099-87b4-3c1ae4e8ede7;98ae57ba-9add-4fe6-9fb3-bce9ae6a5669;f22e4162-0e7a-4685-a9f9-f8c7c4413fb7;1b6278b2-3735-4dbc-b72c-c3a0de8b231b;ae31010e-271a-4578-8b6b-af308af8c194;957ad38f-b0eb-459a-a8d6-fe69e4ceb3ed;19692f61-2cbc-49a2-b4ec-8dc55dad3507;11a6fcf9-f217-42ef-92df-6290e…	Not Available;Not Available;Not Available;Not Available;Not Available;Not Available;Not Available;Not Available;Not Available;Not Available;Not Available;Not Available;Not Available;Not Available;Not Available;Not Available	24;24;24;24;24;24;24;24;24;24;24;24;24;24;24;24	167;1781;167;1487;2512;1294;2176;2268;167;2176;1781;2106;2512;2328;1294;1529	2;1564;2;1322;2328;1051;2115;2207;2;2115;1564;1993;2328;2268;1051;1501	Paclitaxel;Gemcitabine;Carbplatin;Paclitaxel;Gemcitabine;Carboplatin;Avastin;Carboplatin;Gemcitabine;Docetaxel;Cisplatin;Avastin;Avastin;Doxorubicin;Paclitaxel;Doxil	Not Available;Not Available;Not Available;Not Available;Not Available;Not Available;Not Available;Not Available;Not Available;Not Available;Not Available;Not Available;Not Available;Not Available;Not Available;Not Available	11;11;11;11;11;11;11;11;11;11;11;11;11;11;11;11	08;11;08;06;09;12;04;03;08;04;11;06;09;03;12;02	Not Available;Not Available;Not Available;Not Available;Not Available;Not Available;Not Available;Not Available;Not Available;Not Available;Not Available;Not Available;Not Available;Not Available;Not Available;Not Available	mg;mg;AUC;mg;mg;AUC;mg;AUC;mg;mg;mg;mg;mg;mg;mg;mg	ADJUVANT;RECURRENCE;ADJUVANT;RECURRENCE;RECURRENCE;RECURRENCE;RECURRENCE;RECURRENCE;ADJUVANT;RECURRENCE;RECURRENCE;RECURRENCE;RECURRENCE;RECURRENCE;RECURRENCE;RECURRENCE	Not Applicable;Not Applicable;Not Applicable;Not Applicable;Not Applicable;Not Applicable;Not Applicable;Not Applicable;Not Applicable;Not Applicable;Not Applicable;Not Applicable;Not Applicable;Not Applicable;Not Applicable;Not Applicable	Not Available;Not Available;Not Available;Not Available;Not Available;Not Available;Not Available;Not Available;Not Available;Not Available;Not Available;Not Available;Not Available;Not Available;Not Available;Not Available	IV;Not Available;IV;Not Available;Not Available;Not Available;Not Available;Not Available;IV;Not Available;Not Available;Not Available;Not Available;Not Available;Not Available;Not Available	NO;NO;NO;NO;NO;NO;NO;NO;NO;NO;NO;NO;NO;NO;NO;NO	Chemotherapy;Chemotherapy;Chemotherapy;Chemotherapy;Chemotherapy;Chemotherapy;Chemotherapy;Chemotherapy;Chemotherapy;Chemotherapy;Chemotherapy;Chemotherapy;Chemotherapy;Chemotherapy;Chemotherapy;Chemotherapy	Not Available;Not Available;Not Available;Not Available;Not Available;Not Available;Not Available;Not Available;Not Available;Not Available;Not Available;Not Available;Not Available;Not Available;Not Available;Not Available	2534;32496;5;122.1;28756;5;4875;5;17378;124.15;11299.9;7398;2870;343;4004;159	mg;mg;AUC;mg;mg;AUC;mg;AUC;mg;mg;mg;mg;mg;mg;mg;mg	Not Available;Not Available;Not Available;Not Available;Not Available;Not Available;Not Available;Not Available;Not Available;Not Available;Not Available;Not Available;Not Available;Not Available;Not Available;Not Available	2009;2009;2009;2009;2009;2009;2009;2009;2009;2009;2009;2009;2009;2009;2009;2009	0	Not Available	TCGA-04-1542-F24118	6c66cb68-4c55-4a8a-9241-99a2f36bc6fd
TCGA-23-1022	FEMALE	1511	Serous Cystadenocarcinoma	Ovary	Dead	Stage IIIC	G3	1	450		Recurrence	WITH TUMOR		67	Left	TCGA-23-1022	d0673efd-3315-4dd5-8ab6-912bfa07dceb	20	-24798	1511	0	Not Available	TCGA-23-1022-D25578;TCGA-23-1022-D25580;TCGA-23-1022-D25585;TCGA-23-1022-D25583;TCGA-23-1022-D25581;TCGA-23-1022-D25584;TCGA-23-1022-D25577;TCGA-23-1022-D25579;TCGA-23-1022-D25582	331fc9fd-da0f-4cac-99d7-e00038d4bd7c;f1fa07d1-a044-41de-8df7-59d7e43dd7d0;d09f3ba6-475f-44a0-a551-0ce2cf7fc770;02f03126-9559-4f48-b898-b7f5637a68b3;abf39c56-803d-4f80-a5df-e3b2694ada67;b1b96f3b-7fe8-4b7b-838b-327f628319fb;74e65174-6f54-47f9-bf5b-d0f1391cb0dc;fb478bd8-7b3a-4ac6-8819-9d01950ecfe0;0a90f6a3-ec5d-4d6a-9b2f-7faa331d8147	Not Available;Not Available;Not Available;Not Available;Not Available;Not Available;Not Available;Not Available;Not Available	27;27;27;27;27;27;27;27;27	162;741;1378;1252;818;1357;162;741;937	29;614;1378;1056;762;1274;29;614;853	Paclitaxel;Cisplatin;Gemcitabine;Carboplatin;Topotecan;Cyclophosphamide;Carboplatin;Gemcitabine;Docetaxel	Not Available;Not Available;Not Available;Not Available;Not Available;Not Available;Not Available;Not Available;Not Available	3;3;3;3;3;3;3;3;3	7;12;1;7;5;5;7;12;10	Not Available;Not Available;Not Available;Not Available;Not Available;Not Available;Not Available;Not Available;Not Available	mg;mg;mg;mg;mg;mg;mg;mg;mg	ADJUVANT;RECURRENCE;PROGRESSION;PROGRESSION;RECURRENCE;PROGRESSION;ADJUVANT;RECURRENCE;RECURRENCE	Not Applicable;Not Applicable;Not Applicable;Not Applicable;Not Applicable;Not Applicable;Not Applicable;Not Applicable;Not Applicable	Not Available;Not Available;Not Available;Not Available;Not Available;Not Available;Not Available;Not Available;Not Available	IV;IV;IV;IV;IV;IV;IV;IV;IV	NO;NO;NO;NO;NO;NO;NO;NO;NO	Chemotherapy;Chemotherapy;Chemotherapy;Chemotherapy;Chemotherapy;Chemotherapy;Chemotherapy;Chemotherapy;Chemotherapy	Not Available;Not Available;Not Available;Not Available;Not Available;Not Available;Not Available;Not Available;Not Available	2170;820;1560;2500;27.5;8120;2730;17200;640	mg;mg;mg;mg;mg;mg;mg;mg;mg	Not Available;Not Available;Not Available;Not Available;Not Available;Not Available;Not Available;Not Available;Not Available	2009;2009;2009;2009;2009;2009;2009;2009;2009	Not Available	NOT HISPANIC OR LATINO	TCGA-23-1022-F25576	b55a527b-1275-4988-9dd9-7451a0b6a70c
TCGA-13-0923	FEMALE	2547	Serous Cystadenocarcinoma	Ovary	Alive	Stage IIIC	G3	1	1719			TUMOR FREE		74	Right	TCGA-13-0923	378f7ea2-86b4-4072-80b8-e12d67193106	25	-27081	Not Applicable	0	195	TCGA-13-0923-D24783;TCGA-13-0923-D24785;TCGA-13-0923-D24784	942a1a6d-f1f2-4550-bab2-8cdbe1bcdea0;b303f13f-01de-4e5a-8fe1-c7ef1b52fe06;26beddad-f96d-4695-b753-f76cf0f72aeb	Not Available;Not Available;Not Available	15;15;15	151;151;151	39;39;39	Cisplatin;Paclitaxel;Paclitaxel	Not Available;Not Available;Not Available	4;4;4	6;6;6	Not Available;Not Available;Not Available	mg/m2;mg/m2;mg/m2	ADJUVANT;ADJUVANT;ADJUVANT	Not Applicable;Not Applicable;Not Applicable	Not Available;Not Available;Not Available	IP;IP;IV	NO;NO;NO	Chemotherapy;Chemotherapy;Chemotherapy	Not Available;Not Available;Not Available	75;60;135	mg/m2;mg/m2;mg/m2	Not Available;Not Available;Not Available	2009;2009;2009	Not Available	NOT HISPANIC OR LATINO	TCGA-13-0923-F24782;TCGA-13-0923-F72635	490be56a-1798-44b3-9506-10b9657852fa;F8E53537-3FD8-4EDB-8B88-242BBD058BCD
TCGA-24-1105	FEMALE	1442	Serous Cystadenocarcinoma	Ovary	Dead	Stage IIIC	G3	1	470		Recurrence	WITH TUMOR		36	Bilateral	TCGA-24-1105	7e01f23a-0b0e-46a2-9f30-c3a9d2c779d2	9	-13187	1442	0	1442	TCGA-24-1105-D25847;TCGA-24-1105-D25850;TCGA-24-1105-D25852;TCGA-24-1105-D25851;TCGA-24-1105-D25858;TCGA-24-1105-D25845;TCGA-24-1105-D25848;TCGA-24-1105-D25846;TCGA-24-1105-D25849;TCGA-24-1105-D25854;TCGA-24-1105-D25855;TCGA-24-1105-D25853;TCGA-24-1105-D25857;TCGA-24-1105-D25856	f2b55619-c372-4f75-83ac-52dd647bcbf0;19208898-549c-4bec-9587-862255401569;666da692-65f8-4bad-ab2d-32179231bdbf;ddb1bcf5-8150-4936-9f35-65b161732d58;42d6f1c9-fe2e-40a1-8017-3c7fcbb35bb9;a5c72ec2-4288-4610-a12d-5a88be4834ee;6b4fe1cc-975c-40fb-8ba2-24ceed6eb1f4;ecff3707-6213-40e7-bfba-a2b87b1ac780;b0de8465-4152-4b3c-88e6-fc2adbdc54ed;1e77ffe6-2c69-45a6-8102-044a2aa42a6f;df0b4051-0453-488c-abe4-2edae…	Not Available;Not Available;Not Available;Not Available;Not Available;Not Available;Not Available;Not Available;Not Available;Not Available;Not Available;Not Available;Not Available;Not Available	9;9;9;9;9;9;9;9;9;1;1;1;10;10	860;1116;1375;1298;1298;178;860;178;1116;1340;1375;1200;584;584	724;1004;1368;1228;1228;25;724;25;1004;1313;1368;1130;486;486	Topotecan;Doxil;Cisplatin;Cytoxan;Avastin;Carboplatin;Navelbine;Taxol;Gemzar;Taxol;Gemzar;Carboplatin;Taxol;Carboplatin	Not Available;Not Available;Not Available;Not Available;Not Available;Not Available;Not Available;Not Available;Not Available;Not Available;Not Available;Not Available;Not Available;Not Available	3;3;3;3;3;3;3;3;3;2;2;2;3;3	6;4;01;Not Available;Not Available;6;6;6;4;02;01;04;06;06	Not Available;Not Available;Not Available;Not Available;Not Available;Not Available;Not Available;Not Available;Not Available;Not Available;Not Available;Not Available;Not Available;Not Available	mg;mg;mg;mg;mg;mg;mg;mg;mg;mg;mg;mg;mg;mg	RECURRENCE;RECURRENCE;PROGRESSION;PROGRESSION;PROGRESSION;ADJUVANT;RECURRENCE;ADJUVANT;RECURRENCE;PROGRESSION;PROGRESSION;PROGRESSION;RECURRENCE;RECURRENCE	Not Applicable;Not Applicable;Not Applicable;Not Applicable;Not Applicable;Not Applicable;Not Applicable;Not Applicable;Not Applicable;Not Applicable;Not Applicable;Not Applicable;Not Applicable;Not Applicable	Not Available;Not Available;Not Available;Not Available;Not Available;Not Available;Not Available;Not Available;Not Available;Not Available;Not Available;Not Available;Not Available;Not Available	IV;IV;IV;PO;Not Available;IV;IV;IV;IV;IV;IV;IP;IV;IV	NO;NO;NO;NO;NO;NO;NO;NO;NO;NO;NO;NO;NO;NO	Chemotherapy;Chemotherapy;Chemotherapy;Chemotherapy;Targeted Molecular therapy;Chemotherapy;Chemotherapy;Chemotherapy;Chemotherapy;Chemotherapy;Chemotherapy;Chemotherapy;Chemotherapy;Chemotherapy	Not Available;Not Available;Not Available;Not Available;Not Available;Not Available;Not Available;Not Available;Not Available;Not Available;Not Available;Not Available;Not Available;Not Available	48.2;258;92;4500;2001;3410;486;1400;19320;975;1826;2275;1725;3360	mg;mg;mg;mg;mg;mg;mg;mg;mg;mg;mg;mg;mg;mg	Not Available;Not Available;Not Available;Not Available;Not Available;Not Available;Not Available;Not Available;Not Available;Not Available;Not Available;Not Available;Not Available;Not Available	2009;2009;2009;2009;2009;2009;2009;2009;2009;2010;2010;2010;2010;2010	Not Available	Not Available	TCGA-24-1105-F25844	da2b0e1e-ff62-4999-aa12-32768135104d
TCGA-13-A5FU	FEMALE	256	Serous Cystadenocarcinoma	Ovary	Dead	Stage IV	G3	0	256			WITH TUMOR		60	Bilateral	TCGA-13-A5FU	0F7AC6CA-7806-4B2A-9D37-94FF74FCD010	26	-22256	256	0	Not Available	TCGA-13-A5FU-D43573;TCGA-13-A5FU-D43574	84B42869-00D9-41FA-BB29-C17DB74E66C9;A3157A7F-920B-484C-A9B4-BF6C78BC2CFE	Not Available;Not Available	26;26	182;182	35;35	Carboplatin;Paclitaxel	Partial Response;Partial Response	5;5	Not Available;Not Available	Not Available;Not Available	Not Available;Not Available	Not Available;Not Available	Not Applicable;Not Applicable	Not Available;Not Available	Not Available;Not Available	NO;NO	Chemotherapy;Chemotherapy	Not Available;Not Available	Not Available;Not Available	Not Available;Not Available	NO;NO	2013;2013	Not Available	Not Evaluated
TCGA-13-1512	FEMALE	442	Serous Cystadenocarcinoma	Ovary	Alive	Stage IIIC	G3	1	427			Not Available		49	Bilateral	TCGA-13-1512	82093ed9-a3c8-4e34-931f-4ec7ae745711	31	-18134	Not Applicable	0	94	TCGA-13-1512-D24972;TCGA-13-1512-D24971	ff3734cb-1218-44b6-9238-000101ea4d25;7bfa8188-46df-46ec-8f64-73d2c54f71b4	Not Available;Not Available	29;29	94;94	73;73	Paclitaxel;Carboplatin	Not Available;Not Available	6;6	2;2	Not Available;Not Available	mg/m2;mg	ADJUVANT;ADJUVANT	Not Applicable;Not Applicable	Not Available;Not Available	IV;IV	NO;NO	Chemotherapy;Chemotherapy	Not Available;Not Available	175;700	mg/m2;mg	Not Available;Not Available	2009;2009	Not Available	NOT HISPANIC OR LATINO	TCGA-13-1512-F24970;TCGA-13-1512-F72681	440d2b6f-c84d-4658-b921-7d114ea5c138;E62AFE2C-3688-4D2B-BF63-05A8319B0AFA
TCGA-25-1323	FEMALE	395	Serous Cystadenocarcinoma	Ovary	Dead	Stage IIIC	G3	1	365		Progression of Disease	WITH TUMOR		72	Bilateral	TCGA-25-1323	2ee36d9d-128b-4761-aa1a-a637da106f3d	27	-26602	395	0	365	TCGA-25-1323-D26681;TCGA-25-1323-D26683;TCGA-25-1323-D26682	5457762b-8086-46df-b0f1-b18019f572b8;8f1e9ed6-2060-4f4b-a9db-76db4190ce6a;bfd7343e-9a15-493c-9b9d-0895f18fde09	Not Available;Not Available;Not Available	27;27;27	365;122;122	365;30;30	Doxil;Carbo;Taxol	Not Available;Not Available;Not Available	3;3;3	2;5;5	Not Available;Not Available;Not Available	Not Available;Not Available;Not Available	RECURRENCE;ADJUVANT;ADJUVANT	Not Applicable;Not Applicable;Not Applicable	Not Available;Not Available;Not Available	IV;IV;IV	Not Available;NO;NO	Chemotherapy;Chemotherapy;Chemotherapy	Not Available;Not Available;Not Available	Not Available;Not Available;Not Available	Not Available;Not Available;Not Available	Not Available;Not Available;Not Available	2009;2009;2009	Not Available	NOT HISPANIC OR LATINO	TCGA-25-1323-F26680	7dca5a46-41d3-4c92-bfbc-ff6a771731a1
TCGA-23-1109	FEMALE	1562	Serous Cystadenocarcinoma	Ovary	Dead	Stage IIIC	G3	1	987		Recurrence	WITH TUMOR		62	Right	TCGA-23-1109	7c466a5f-a6b4-4d1a-a0f5-ddcd7ef90ff1	19	-23002	1562	0	1562																								Not Available	NOT HISPANIC OR LATINO	TCGA-23-1109-F25663	bf98d383-003d-451a-b7fa-7986df387d5c
TCGA-29-2414	FEMALE	2621	Serous Cystadenocarcinoma	Ovary	Dead	Stage IIIC	G2	1	552		Recurrence	WITH TUMOR		75	Left	TCGA-29-2414	a2319490-b85d-4219-a1b0-fa1ec432d5c8	9	-27417	2621	0	2621	TCGA-29-2414-D27456;TCGA-29-2414-D27455;TCGA-29-2414-D27452;TCGA-29-2414-D27453;TCGA-29-2414-D27454;TCGA-29-2414-D27458;TCGA-29-2414-D27457;TCGA-29-2414-D27459	f1b37728-c715-49d5-8f09-f3ccd3f67332;625a1bad-817a-495e-bbe8-b1b729a59ddc;132a139a-586a-4d1a-af97-fa14a99ca34a;1bb30d93-19c1-43d9-aff6-31304c0e1cab;d3474bc8-4f86-4d81-95e2-3bc02d4caeaf;317f4820-8ca1-4a04-914d-ed26beb2ab02;b3519929-e195-4d53-a529-432c75296acc;d4828223-bc26-41cd-87bd-0dc1451bb931	Not Available;Not Available;Not Available;Not Available;Not Available;Not Available;Not Available;Not Available	9;9;9;9;9;10;10;12	131;131;2151;2287;2424;1171;1171;1171	3;3;2042;2256;2315;996;996;996	Cisplatin;Paclitaxel;Carboplatin;Doxil;Topotecan;Carboplatin;Paclitaxel;Paclitaxel	Not Available;Not Available;Not Available;Not Available;Not Available;Not Available;Not Available;Not Available	2;2;2;2;2;3;3;3	06;06;06;02;03;Not Available;Not Available;Not Available	Not Available;Not Available;Not Available;Not Available;Not Available;Not Available;Not Available;Not Available	mg/m2;mg/m2;AUC;mg/m2;mg/m2;Not Available;Not Available;Not Available	ADJUVANT;ADJUVANT;PROGRESSION;PROGRESSION;PROGRESSION;PROGRESSION;PROGRESSION;PROGRESSION	Not Applicable;Not Applicable;Not Applicable;Not Applicable;Not Applicable;Not Applicable;Not Applicable;Not Applicable	Not Available;Not Available;Not Available;Not Available;Not Available;Not Available;Not Available;Not Available	IV;IV;IV;IV;IV;IV;IV;IV	NO;NO;NO;NO;NO;NO;NO;NO	Chemotherapy;Chemotherapy;Chemotherapy;Chemotherapy;Chemotherapy;Chemotherapy;Chemotherapy;Chemotherapy	Not Available;Not Available;Not Available;Not Available;Not Available;Not Available;Not Available;Not Available	75;20;5;40;3;Not Available;Not Available;Not Available	mg/m2;mg/m2;AUC;mg/m2;mg/m2;Not Available;Not Available;Not Available	Not Available;Not Available;Not Available;Not Available;Not Available;Not Available;Not Available;Not Available	2010;2010;2010;2010;2010;2010;2010;2010	Not Available	Not Available	TCGA-29-2414-F27451	955879e7-53f1-48e3-85c2-47d63a4b8113
TCGA-24-1427	FEMALE	147	Serous Cystadenocarcinoma	Ovary	Alive	Stage IIIC	G3	0	147			WITH TUMOR		58	Bilateral	TCGA-24-1427	02d9aa2e-b16a-48ea-a420-5daed9fd51a6	15	-21423	Not Applicable	0	147	TCGA-24-1427-D25958;TCGA-24-1427-D25957	f0961ad4-f0c1-406c-ae2d-9d44d6118237;c30b8039-7ef8-495e-954e-b0985c302c10	Not Available;Not Available	16;16	147;147	14;14	Carboplatin;Paclitaxel	Not Available;Not Available	4;4	06;06	Not Available;Not Available	mg;mg	ADJUVANT;ADJUVANT	Not Applicable;Not Applicable	Not Available;Not Available	IV;IV	NO;NO	Chemotherapy;Chemotherapy	Not Available;Not Available	3848;1996	mg;mg	Not Available;Not Available	2009;2009	Not Available	Not Available	TCGA-24-1427-F25956	d5a10323-1f25-4c1f-9f25-44f6a2648a1d
TCGA-13-0916	FEMALE	1785	Serous Cystadenocarcinoma	Ovary	Alive	Stage IIIC	G3	0	1785			TUMOR FREE		49	Bilateral	TCGA-13-0916	5f60bc2d-738f-43fc-a3fb-61ec6e80e3d4	25	-18189	Not Applicable	0	644	TCGA-13-0916-D24768;TCGA-13-0916-D24766;TCGA-13-0916-D24767;TCGA-13-0916-D24769	d5f8a386-7074-40a4-9d62-699ba2571deb;e035fe81-878f-4509-ad6e-98266495e5bd;d53e97a9-93d9-46ad-9bd1-1851d1cff4a4;a5460512-89a7-41f5-9ea2-63e47680924a	Not Available;Not Available;Not Available;Not Available	16;16;16;16	161;161;161;182	35;35;35;70	Paclitaxel;Cisplatin;Paclitaxel;Bevacizumab	Not Available;Not Available;Not Available;Not Available	4;4;4;4	6;6;6;Not Available	Not Available;Not Available;Not Available;Not Available	mg/m2;mg/m2;mg/m2;mg/m2	ADJUVANT;ADJUVANT;ADJUVANT;ADJUVANT	Not Applicable;Not Applicable;Not Applicable;Not Applicable	Not Available;Not Available;Not Available;Not Available	IP;IP;IV;Not Available	Not Available;Not Available;Not Available;Not Available	Chemotherapy;Chemotherapy;Chemotherapy;Targeted Molecular therapy	Not Available;Not Available;Not Available;Not Available	60;75;135;15	mg/m2;mg/m2;mg/m2;mg/m2	Not Available;Not Available;Not Available;Not Available	2009;2009;2009;2009	Not Available	NOT HISPANIC OR LATINO	TCGA-13-0916-F24765;TCGA-13-0916-F72631	e104764b-efb0-4872-8f3f-d164a3d89d09;956B3950-5354-4481-AAE4-18887FCE8A40
TCGA-61-2109	FEMALE	629	Serous Cystadenocarcinoma	Ovary	Dead	Stage IIIC	G3	1	465		Recurrence	WITH TUMOR		40	Bilateral	TCGA-61-2109	dc5a6ce7-01e5-408d-812e-e3e0ddc1cde5	7	-14900	629	0	629	TCGA-61-2109-D28451;TCGA-61-2109-D28452;TCGA-61-2109-D28454;TCGA-61-2109-D28453	c0bde517-fee3-47fb-8d5f-e06a0012720c;8e1688ad-53a1-4989-98a4-ba00ccbb8717;fd722d54-c930-4c8a-b35d-106c76576754;2ea9b28a-6af9-4fcd-aa66-d49a600f60ac	Not Available;Not Available;Not Available;Not Available	7;7;7;7	253;253;601;601	14;14;486;486	Taxol;Carboplatin;Cisplatin;Gemzar	Not Available;Not Available;Not Available;Not Available	12;12;12;12	10;10;05;05	Not Available;Not Available;Not Available;Not Available	mg;mg;mg;mg	ADJUVANT;ADJUVANT;RECURRENCE;RECURRENCE	Not Applicable;Not Applicable;Not Applicable;Not Applicable	Not Available;Not Available;Not Available;Not Available	IV;IV;IV;IV	NO;NO;NO;NO	Chemotherapy;Chemotherapy;Chemotherapy;Chemotherapy	Not Available;Not Available;Not Available;Not Available	3125;8910;325;9060	mg;mg;mg;mg	Not Available;Not Available;Not Available;Not Available	2009;2009;2009;2009	Not Available	NOT HISPANIC OR LATINO	TCGA-61-2109-F28450	716014bf-2f9f-4dc8-81fe-c2baa9c4303c
TCGA-24-1419	FEMALE	239	Serous Cystadenocarcinoma	Ovary	Alive	Stage IIIC	G3	0	239			TUMOR FREE		62	Bilateral	TCGA-24-1419	5e18b17d-4626-4b6d-8ac6-e560cee0376c	15	-22659	Not Applicable	0	239	TCGA-24-1419-D25931;TCGA-24-1419-D25930;TCGA-24-1419-D25932	fb686b35-70cb-45e0-991c-0169f28f0115;91f667fe-afb5-471d-af76-66b09ed65858;248762ea-e200-4742-b0f3-bcd821f96cf3	Not Available;Not Available;Not Available	15;15;24	Not Available;121;131	197;17;17	Pacitaxel;Carboplatin;Docetaxel	Not Available;Not Available;Not Available	4;4;4	02;06;6	Not Available;Not Available;Not Available	mg;mg;mg	OTHER, SPECIFY IN NOTES;ADJUVANT;ADJUVANT	Consolidation chemotherapy;Not Applicable;Not Applicable	Not Available;Not Available;Not Available	IV;IV;IV	YES;NO;NO	Chemotherapy;Chemotherapy;Chemotherapy	Not Available;Not Available;Not Available	478;3882;806	mg;mg;mg	Not Available;Not Available;Not Available	2009;2009;2009	Not Available	Not Available	TCGA-24-1419-F25929	96d20828-bb11-4024-9701-2e35ab3fc712
TCGA-13-0797	FEMALE	2121	Serous Cystadenocarcinoma	Ovary	Alive	Stage IIIC	G3	1	525			TUMOR FREE		49	Bilateral	TCGA-13-0797	0de910b1-edaf-47e4-a265-727ee12ac1c3	25	-18051	Not Applicable	0	265	TCGA-13-0797-D24607;TCGA-13-0797-D24608	88409662-1902-43f0-bc49-17443a879455;d8ca87b3-32a4-4fad-9419-710ff00e2cb0	Not Available;Not Available	16;16	146;146	42;42	Carboplatin;Paclitaxel	Not Available;Not Available	4;4	6;6	Not Available;Not Available	mg;mg/m2	ADJUVANT;ADJUVANT	Not Applicable;Not Applicable	Not Available;Not Available	IV;IV	NO;NO	Chemotherapy;Chemotherapy	Not Available;Not Available	599;135	mg;mg/m2	Not Available;Not Available	2009;2009	Not Available	NOT HISPANIC OR LATINO	TCGA-13-0797-F24606;TCGA-13-0797-F72609	7a9f7b35-642f-4607-89fb-d55ba2600b53;6B845366-8766-4993-88E1-6BF15470F330
TCGA-13-0723	FEMALE	1204	Serous Cystadenocarcinoma	Ovary	Dead	Stage IIIC	G3	1	210		Progression of Disease	WITH TUMOR		63	Bilateral	TCGA-13-0723	ff530f28-0ec0-4494-bb54-44bb055bae1c	24	-23094	1204	0	1204	TCGA-13-0723-D24504;TCGA-13-0723-D24505	bb7c2bfe-7d7b-485e-a5f7-145a5a680ef7;2da9827e-d8d0-4341-9c31-da97c92e0d3f	Not Available;Not Available	16;16	200;200	28;28	Carboplatin;Paclitaxel	Not Available;Not Available	4;4	8;8	Not Available;Not Available	Not Available;mg/m2	ADJUVANT;ADJUVANT	Not Applicable;Not Applicable	Not Available;Not Available	IV;IV	Not Available;Not Available	Chemotherapy;Chemotherapy	Not Available;Not Available	Not Available;175	Not Available;mg/m2	Not Available;Not Available	2009;2009	Not Available	NOT HISPANIC OR LATINO	TCGA-13-0723-F24503	6575a21c-5073-473d-8606-98a740946cb5
TCGA-36-2543	FEMALE	68	Serous Cystadenocarcinoma	Ovary	Dead	Stage IIIC	G3	1	27		Progression of Disease	WITH TUMOR		85	Bilateral	TCGA-36-2543	73b63d07-0c1d-4bf2-bf11-b183e090e200	18	-31211	68	0	68																								3	Not Available	TCGA-36-2543-F27946	39b21e93-385a-47bc-b804-7db98b08fde2
TCGA-61-2009	FEMALE	1212	Serous Cystadenocarcinoma	Ovary	Alive	Stage IIIC	G3	1	101		Recurrence	WITH TUMOR		65	Bilateral	TCGA-61-2009	ae914f23-87b9-4169-a7f7-a3483078c902	8	-23772	Not Applicable	0	1212	TCGA-61-2009-D28343;TCGA-61-2009-D28346;TCGA-61-2009-D28350;TCGA-61-2009-D28345;TCGA-61-2009-D28342;TCGA-61-2009-D28348;TCGA-61-2009-D28349;TCGA-61-2009-D28347;TCGA-61-2009-D28344	d23924cf-bfbe-491c-857d-ee0725112933;fb931ec9-877c-411a-b75f-07a07fd3afd4;9d9b6e91-c5ec-4d50-b8fc-c27068ee4470;3ff0898b-635f-4c55-b7d9-beb06c6248c8;fd4307f9-d370-43de-9bb1-aa5a096b8295;ef2747cc-31fe-4893-8aab-d084a7b528c2;60906890-5f6c-494d-8601-e9967fafa145;a6d772c2-aeae-48ee-9e3e-c9357345c653;6d2c40c5-e1e8-4083-a77d-24b61b62bef7	Not Available;Not Available;Not Available;Not Available;Not Available;Not Available;Not Available;Not Available;Not Available	8;8;8;8;8;8;8;8;8	83;295;Not Available;295;83;1003;1126;1003;295	41;120;658;120;41;839;1100;839;120	Carboplatin;Taxol;Tamoxifen;Cisplatin;Taxol;Docetaxel;Doxil;Oxaliplatin;Taxol	Not Available;Not Available;Not Available;Not Available;Not Available;Not Available;Not Available;Not Available;Not Available	12;12;12;12;12;12;12;12;12	06;07;Not Available;07;06;07;04;07;07	Not Available;Not Available;Not Available;Not Available;Not Available;Not Available;Not Available;Not Available;Not Available	mg;mg;Not Available;mg;mg;mg;mg;mg;mg	ADJUVANT;RECURRENCE;RECURRENCE;RECURRENCE;ADJUVANT;RECURRENCE;RECURRENCE;RECURRENCE;RECURRENCE	Not Applicable;Not Applicable;Not Applicable;Not Applicable;Not Applicable;Not Applicable;Not Applicable;Not Applicable;Not Applicable	Not Available;Not Available;Not Available;Not Available;Not Available;Not Available;Not Available;Not Available;Not Available	IV;IP;IV;Not Available;IP;IV;IV;IP;IV;IV;IP;IV;IP;IV	NO;NO;NO;NO;NO;NO;NO;NO;NO	Chemotherapy;Chemotherapy;Hormone Therapy;Chemotherapy;Chemotherapy;Chemotherapy;Chemotherapy;Chemotherapy;Chemotherapy	Not Available;Not Available;Not Available;Not Available;Not Available;Not Available;Not Available;Not Available;Not Available	1545;490;Not Available;635;778;658;304;987;1200	mg;mg;Not Available;mg;mg;mg;mg;mg;mg	Not Available;Not Available;Not Available;Not Available;Not Available;Not Available;Not Available;Not Available;Not Available	2009;2009;2009;2009;2009;2009;2009;2009;2009	Not Available	NOT HISPANIC OR LATINO	TCGA-61-2009-F28341	fc604495-213e-4fd9-bf0b-968863d4f36d
TCGA-36-2540	FEMALE	724	Serous Cystadenocarcinoma	Ovary	Alive	Stage IIIC	G1	1	665		Recurrence	WITH TUMOR		26	Bilateral	TCGA-36-2540	30c7efdd-5a86-4418-a33c-a5d27fe56e42	18	-9760	Not Applicable	0	724	TCGA-36-2540-D27937;TCGA-36-2540-D27940;TCGA-36-2540-D27938;TCGA-36-2540-D27939	ae88c1fa-9bf0-4d92-8b5b-786a2cdb17ca;e4be68cd-4638-4590-b0f3-6f83e64f48b0;eb3e8ac7-0199-40aa-b642-d77d932a1478;d8bff8c2-883d-4027-bb84-1ed49eb546f2	Not Available;Not Available;Not Available;Not Available	18;18;18;18	185;Not Available;185;Not Available	46;726;46;726	Carboplatin;Paclitaxel;Paclitaxel;Carboplatin	Not Available;Not Available;Not Available;Not Available	8;8;8;8	06;Not Available;06;Not Available	1280;300;370;940	mg;mg;mg;mg	ADJUVANT;RECURRENCE;ADJUVANT;RECURRENCE	Not Applicable;Not Applicable;Not Applicable;Not Applicable	Not Available;Not Available;Not Available;Not Available	IV;IV;IV;IV	NO;YES;NO;YES	Chemotherapy;Chemotherapy;Chemotherapy;Chemotherapy	Not Available;Not Available;Not Available;Not Available	7680;Not Available;2220;Not Available	mg;mg;mg;mg	Not Available;Not Available;Not Available;Not Available	2010;2010;2010;2010	0	NOT HISPANIC OR LATINO	TCGA-36-2540-F27936	e4383d0b-9cc4-4fb5-a4a1-312928dd2e34
TCGA-10-0928	FEMALE	563	Serous Cystadenocarcinoma	Ovary	Dead	Stage IIIC	G3	0	563			WITH TUMOR		71	Bilateral	TCGA-10-0928	29d26e7e-f4ae-4476-9a3f-27d5ec2ccb8a	6	-26066	563	0	563																								0	Not Available	TCGA-10-0928-F24430	c87807df-3345-4970-807a-a338040b2c38
TCGA-13-0799	FEMALE	2535	Serous Cystadenocarcinoma	Ovary	Alive	Stage IIIC	G3	1	1262			TUMOR FREE		44	Bilateral	TCGA-13-0799	b9418c6d-94f7-4db4-a1e4-f384b09d54cb	25	-16171	Not Applicable	0	237	TCGA-13-0799-D24613;TCGA-13-0799-D24612;TCGA-13-0799-D24611	8484fd14-0e7e-45a2-86ce-bcd6b8dfdc48;a3617379-b708-456a-9810-14b2afa80f6d;9d2e034d-d90b-4a71-9671-3b061af0102a	Not Available;Not Available;Not Available	16;16;16	146;146;146	36;36;36	Paclitaxel;Paclitaxel;Cisplatin	Not Available;Not Available;Not Available	4;4;4	6;6;6	Not Available;Not Available;Not Available	mg/m2;mg/m2;mg/m2	ADJUVANT;ADJUVANT;ADJUVANT	Not Applicable;Not Applicable;Not Applicable	Not Available;Not Available;Not Available	IP;IV;IP	NO;NO;NO	Chemotherapy;Chemotherapy;Chemotherapy	Not Available;Not Available;Not Available	60;135;75	mg/m2;mg/m2;mg/m2	Not Available;Not Available;Not Available	2009;2009;2009	Not Available	NOT HISPANIC OR LATINO	TCGA-13-0799-F24610;TCGA-13-0799-F72611	20105ff9-cc71-41ab-942d-44454c233406;D33DF974-173A-47AB-BE8E-C9A201712C32
TCGA-20-1683	FEMALE	772	Serous Cystadenocarcinoma	Ovary	Alive	Stage IIIC	G3	1	618		Recurrence	TUMOR FREE		65	Right	TCGA-20-1683	ac2e88ff-8b1e-4691-9a96-5a581f98d827	2	-24006	Not Applicable	0	772	TCGA-20-1683-D25545;TCGA-20-1683-D25546;TCGA-20-1683-D25547	224f8ff6-5ded-405b-b206-521b0ae15315;7175a7a2-ccb7-4926-88d0-fac1af5a4ba7;350300e1-643d-4b95-90bb-307cc8934f29	Not Available;Not Available;Not Available	27;27;27	135;135;Not Available	17;17;618	Carboplatin;Taxol;Tamoxifen	Not Available;Not Available;Not Available	7;7;7	06;06;Not Available	Not Available;Not Available;Not Available	AUC;mg/m2;mg	ADJUVANT;ADJUVANT;ADJUVANT	Not Applicable;Not Applicable;Not Applicable	Not Available;Not Available;Not Available	IV;IV;Not Available	NO;NO;YES	Chemotherapy;Chemotherapy;Hormone Therapy	Not Available;Not Available;Not Available	6;175;20	AUC;mg/m2;mg	Not Available;Not Available;Not Available	2009;2009;2009	0	NOT HISPANIC OR LATINO	TCGA-20-1683-F25544	bbb59b9b-39a7-4e23-89cd-1c5b0514362a
TCGA-09-0367	FEMALE	547	Serous Cystadenocarcinoma	Ovary	Dead	Stage IIIC	G3	0	547			WITH TUMOR		67	Bilateral	TCGA-09-0367	9bbc01b4-056c-4ddc-aca4-ff20718646d0	4	-24473	547	0	Not Available	TCGA-09-0367-D24214;TCGA-09-0367-D24213;TCGA-09-0367-D24215	4e41a6a2-7536-4235-b3e2-307541a2f55e;5947ae4d-2a9e-4e90-87e6-dca175e44cc6;c830352b-ac14-400e-a5e8-24d933b324ce	Not Available;Not Available;Not Available	27;27;27	92;92;Not Available	9;9;153	taxol;Carbo;gemcitabine	Not Available;Not Available;Not Available	3;3;3	5;5;4	Not Available;Not Available;Not Available	mg/m2;Not Available;mg	ADJUVANT;ADJUVANT;OTHER, SPECIFY IN NOTES	Not Applicable;Not Applicable;Not Available	Not Available;Not Available;Not Available	IV;IV;IV	NO;NO;NO	Chemotherapy;Chemotherapy;Chemotherapy	Not Available;Not Available;Not Available	175;Not Available;1145	mg/m2;Not Available;mg	Not Available;Not Available;Not Available	2009;2009;2009	Not Available	NOT HISPANIC OR LATINO	TCGA-09-0367-F24212	76060e1e-8ff9-4936-8b9a-5dd98ffb89b3
TCGA-30-1869	FEMALE	1563	Serous Cystadenocarcinoma	Ovary	Dead	Stage IV	G3	1	767		Recurrence	WITH TUMOR		50	Bilateral	TCGA-30-1869	84f5876d-82b0-45ff-8f3d-a10653683454	2	-18398	1563	0	1563	TCGA-30-1869-D27616;TCGA-30-1869-D27609;TCGA-30-1869-D27610;TCGA-30-1869-D27612;TCGA-30-1869-D27614;TCGA-30-1869-D27613;TCGA-30-1869-D27615;TCGA-30-1869-D27608;TCGA-30-1869-D27617;TCGA-30-1869-D27611;TCGA-30-1869-D27618	baf2c401-c86f-49bf-a41e-7796a1bdab3e;d9cac678-a898-49d5-b2a4-66e0b4a3f093;3e6d063a-3c03-4260-a94a-c80bf3c5d04a;99f53275-3d20-47d8-b7a2-9abc8e23d5ec;f1585f4b-3343-44d0-a65c-ea6a32f8f8f9;b19d902f-e78b-4c03-8c6d-10e286a434f3;2a21156d-6a16-4035-bcbe-3876506d6d74;65d2783e-d0d4-43f0-b528-fa7114edf7cd;140f7ef0-28fe-4f59-83ca-87f440debd96;2e966536-4070-4988-b610-3209fb63fbd4;9c9e5af4-0f8a-426b-8a5a-445a5…	Not Available;Not Available;Not Available;Not Available;Not Available;Not Available;Not Available;Not Available;Not Available;Not Available;Not Available	21;21;21;21;21;21;21;21;21;21;27	1489;179;179;943;1331;1211;1489;179;1534;943;1175	1398;22;22;767;1279;1184;1398;22;1510;767;1132	Taxol;Gemcitabine;Carboplatin;Carboplatin;SNS 595;Doxil;Carbplatin;Taxol;Topotecan;Alimta;Avastin	Not Available;Not Available;Not Available;Not Available;Not Available;Not Available;Not Available;Not Available;Not Available;Not Available;Not Available	12;12;12;12;12;12;12;12;12;12;1	06;09;09;08;02;Not Available;06;09;03;08;Not Available	Not Available;Not Available;Not Available;Not Available;Not Available;Not Available;Not Available;Not Available;Not Available;Not Available;Not Available	mg/m2;mg/m2;AUC;mg/m2;mg/m2;mg/m2;AUC;mg/m2;mg/m2;mg/m2;mg	PROGRESSION;ADJUVANT;ADJUVANT;RECURRENCE;PROGRESSION;PROGRESSION;PROGRESSION;ADJUVANT;PROGRESSION;RECURRENCE;RECURRENCE	Not Applicable;Not Applicable;Not Applicable;Not Applicable;Not Applicable;Not Applicable;Not Applicable;Not Applicable;Not Applicable;Not Applicable;Not Applicable	Not Available;Not Available;Not Available;Not Available;Not Available;Not Available;Not Available;Not Available;Not Available;Not Available;Not Available	IV;IV;IV;IV;IV;IV;IV;IV;IV;IV;IV	NO;NO;NO;NO;NO;NO;NO;NO;NO;NO;NO	Chemotherapy;Chemotherapy;Chemotherapy;Chemotherapy;Chemotherapy;Chemotherapy;Chemotherapy;Chemotherapy;Chemotherapy;Chemotherapy;Targeted Molecular therapy	Not Available;Not Available;Not Available;Not Available;Not Available;Not Available;Not Available;Not Available;Not Available;Not Available;Not Available	175;1000;5;400;48;40;5;175;3;500;30	mg/m2;mg/m2;AUC;mg/m2;mg/m2;mg/m2;AUC;mg/m2;mg/m2;mg/m2;mg	Not Available;Not Available;Not Available;Not Available;Not Available;Not Available;Not Available;Not Available;Not Available;Not Available;Not Available	2009;2009;2009;2009;2009;2009;2009;2009;2009;2009;2010	Not Available	NOT HISPANIC OR LATINO	TCGA-30-1869-F27607	abee4203-c623-4b6e-8808-cd75ae936da3
TCGA-61-2614	FEMALE	262	Serous Cystadenocarcinoma	Ovary	Dead	Stage IIIC	G3	1	38		Recurrence	WITH TUMOR		71	Bilateral	TCGA-61-2614	09643c0d-efdb-46b4-94df-018bd6134a88	7	-26142	262	0	262																								Not Available	Not Available	TCGA-61-2614-F28505	6f9863a6-5596-41d2-8532-fbac794ef1c6
TCGA-24-1920	FEMALE	298	Serous Cystadenocarcinoma	Ovary	Alive	Stage IIIC	G3	0	298			TUMOR FREE		74	Right	TCGA-24-1920	97efb80d-4f46-4aef-b95e-20d260de01b2	3	-27042	Not Applicable	0	298	TCGA-24-1920-D26375;TCGA-24-1920-D26377;TCGA-24-1920-D26374;TCGA-24-1920-D26376	dbe3b69a-5471-42c9-b8e2-7f0a3447efca;7df933df-bf58-41f3-81b9-772e4f0b5960;d93c627d-3367-4275-af6c-0f3fb99702c6;60e3adc8-609a-4ba5-823a-c75a423ac0b5	Not Available;Not Available;Not Available;Not Available	3;3;3;3	144;144;144;144	24;24;24;24	Cisplatin;Carboplatin;Taxotere;Taxol	Not Available;Not Available;Not Available;Not Available	2;2;2;2	06;06;06;06	Not Available;Not Available;Not Available;Not Available	mg;mg;mg;mg	ADJUVANT;ADJUVANT;ADJUVANT;ADJUVANT	Not Applicable;Not Applicable;Not Applicable;Not Applicable	Not Available;Not Available;Not Available;Not Available	IP;IV;IV;IP	NO;NO;NO;NO	Chemotherapy;Chemotherapy;Chemotherapy;Chemotherapy	Not Available;Not Available;Not Available;Not Available	354;593;540;224	mg;mg;mg;mg	Not Available;Not Available;Not Available;Not Available	2010;2010;2010;2010	0	Not Available	TCGA-24-1920-F26373	d6fe4337-d7f6-4b68-bd9f-e3473853b265
TCGA-61-2113	FEMALE	676	Serous Cystadenocarcinoma	Ovary	Dead	Stage IIC	G3	1	291		Recurrence	Not Available		53	Right	TCGA-61-2113	71faa2c1-0d5b-4dcc-bdf9-f2405f29907c	7	-19722	676	0	676	TCGA-61-2113-D28480;TCGA-61-2113-D28482;TCGA-61-2113-D28481	d22d635b-1e7e-4114-9e2d-0d2b6db38ded;235aa36e-7dcb-4f30-bc39-310e5bca1a66;d4d534c2-01be-4eff-bfb2-369ee917dcf2	Not Available;Not Available;Not Available	7;7;7	143;392;143	49;336;49	Taxol;Doxil;Carboplatin	Not Available;Not Available;Not Available	12;12;12	06;02;06	Not Available;Not Available;Not Available	mg/m2;mg/m2;mg	ADJUVANT;ADJUVANT;ADJUVANT	Not Applicable;Not Applicable;Not Applicable	Not Available;Not Available;Not Available	IV;IP;IV;IV	NO;NO;NO	Chemotherapy;Chemotherapy;Chemotherapy	Not Available;Not Available;Not Available	1480;418;4026	mg/m2;mg/m2;mg	Not Available;Not Available;Not Available	2009;2009;2009	Not Available	NOT HISPANIC OR LATINO	TCGA-61-2113-F28479	58e8e9bc-2bf0-47e6-a806-3a51341022fb
TCGA-61-2104	FEMALE	2338	Serous Cystadenocarcinoma	Ovary	Alive	Stage IIC	G2	1	1680		Recurrence	Not Available		53	Bilateral	TCGA-61-2104	05263959-c4f5-4540-b6d2-d8c8a128861f	7	-19432	Not Applicable	0	2338	TCGA-61-2104-D28447;TCGA-61-2104-D28446;TCGA-61-2104-D28445;TCGA-61-2104-D28444;TCGA-61-2104-D28448;TCGA-61-2104-D28443	172b7324-19f1-4c6a-9b48-f25584cfe417;32cf4d72-b8d4-4a25-99aa-7918878ab0d8;bc697473-6eba-4dfb-8a1c-4a4b60daa0d1;6d9216c8-daf8-4211-927c-874a245d8a96;a1b6da11-0c8e-4f50-bdd0-5590dcf6b817;16e277f4-06cf-4d80-8c70-a07667591497	Not Available;Not Available;Not Available;Not Available;Not Available;Not Available	7;7;7;7;7;7	1681;Not Available;Not Available;Not Available;2338;Not Available	1680;1197;1197;6;1838;6	Cisplatin;Taxol;Carboplatin;Taxol;Taxane;Carboplatin	Not Available;Not Available;Not Available;Not Available;Not Available;Not Available	12;12;12;12;12;12	01;Not Available;Not Available;06;Not Available;06	Not Available;Not Available;Not Available;Not Available;Not Available;Not Available	mg;Not Available;Not Available;Not Available;Not Available;Not Available	RECURRENCE;ADJUVANT;ADJUVANT;ADJUVANT;RECURRENCE;ADJUVANT	Not Applicable;Not Applicable;Not Applicable;Not Applicable;Not Applicable;Not Applicable	Not Available;Not Available;Not Available;Not Available;Not Available;Not Available	IP;IV;IV;IV;IV;IV	NO;NO;NO;NO;NO;NO	Chemotherapy;Chemotherapy;Chemotherapy;Chemotherapy;Chemotherapy;Chemotherapy	Not Available;Not Available;Not Available;Not Available;Not Available;Not Available	200;Not Available;Not Available;Not Available;Not Available;Not Available	mg;Not Available;Not Available;Not Available;Not Available;Not Available	Not Available;Not Available;Not Available;Not Available;Not Available;Not Available	2009;2009;2009;2009;2009;2009	Not Available	Not Available	TCGA-61-2104-F28442	02ac5e72-78e8-458e-9966-f78a3fb86f69
TCGA-36-2530	FEMALE	1004	Serous Cystadenocarcinoma	Ovary	Alive	Stage IIIC	G3	1	630		Recurrence	WITH TUMOR		38	Bilateral	TCGA-36-2530	92a1a8f3-54f2-4983-bb14-dcb73658d897	17	-13885	Not Applicable	0	1004	TCGA-36-2530-D27907;TCGA-36-2530-D27908;TCGA-36-2530-D27910;TCGA-36-2530-D27909;TCGA-36-2530-D27911	1de2a511-cd83-4b35-8503-f3f0dc13bb5b;4e54a205-21a1-4976-8efb-8bf32ebc5abf;215057f5-f69e-4580-ae14-b0022e318d6a;4444d108-727d-4d9d-a952-8bbcb1dbb4f9;25e8b24b-f738-482a-9dfc-14cda1f2e880	Not Available;Not Available;Not Available;Not Available;Not Available	17;17;17;17;17	135;135;763;763;982	21;21;639;639;639	Carboplatin;Paclitaxel;Paclitaxel;Carboplatin;Cediranib Placebo	Not Available;Not Available;Not Available;Not Available;Not Available	8;8;8;8;8	06;06;06;06;Not Available	660;78;179;560;15	mg;mg;mg;mg;mg	ADJUVANT;ADJUVANT;RECURRENCE;RECURRENCE;RECURRENCE	Not Applicable;Not Applicable;Not Applicable;Not Applicable;Not Applicable	Not Available;Not Available;Not Available;Not Available;Not Available	IP;IP;IV;IV;PO	NO;NO;NO;NO;NO	Chemotherapy;Chemotherapy;Chemotherapy;Chemotherapy;Targeted Molecular therapy	Not Available;Not Available;Not Available;Not Available;Not Available	3960;1836;1196;3808;Not Available	mg;mg;mg;mg;mg	Not Available;Not Available;Not Available;Not Available;Not Available	2010;2010;2010;2010;2010	Not Available	NOT HISPANIC OR LATINO	TCGA-36-2530-F27906	eb2af194-4072-4aae-8504-3c74a9900431
TCGA-04-1655	FEMALE	1380	Serous Cystadenocarcinoma	Ovary	Dead	Stage IIIB	G2	1	819		Recurrence	Not Available		49	Bilateral	TCGA-04-1655	f8a5547f-f1bc-4c01-8b68-25b5ee0caeab	2	-17988	1380	0	Not Available	TCGA-04-1655-D24192;TCGA-04-1655-D24194;TCGA-04-1655-D24196;TCGA-04-1655-D24195;TCGA-04-1655-D24193	0fc35dff-0325-4013-8faa-f9338450f776;d6ee6177-9651-4002-8886-321a006ddb09;6af7c96d-fd92-4419-89f8-4a3f81291128;31f9f5de-7d10-4be7-922a-486e53358208;6554c537-7883-461c-a2bc-e5d5cff12e2f	Not Available;Not Available;Not Available;Not Available;Not Available	9;9;9;9;9	139;139;Not Available;Not Available;139	34;34;839;184;34	Taxol;Taxol;Carboplatin;Taxol;Cisplatin	Not Available;Not Available;Not Available;Not Available;Not Available	11;11;11;11;11	06;06;Not Available;Not Available;06	Not Available;Not Available;Not Available;Not Available;Not Available	mg;mg;Not Available;Not Available;mg	ADJUVANT;ADJUVANT;RECURRENCE;RECURRENCE;ADJUVANT	Not Applicable;Not Applicable;Not Applicable;Not Applicable;Not Applicable	Not Available;Not Available;Not Available;Not Available;Not Available	IV;IP;IV;IV;IV;IP;IV	NO;NO;NO;NO;NO	Chemotherapy;Chemotherapy;Chemotherapy;Chemotherapy;Chemotherapy	Not Available;Not Available;Not Available;Not Available;Not Available	1288;574;Not Available;Not Available;953	mg;mg;Not Available;Not Available;mg	Not Available;Not Available;Not Available;Not Available;Not Available	2009;2009;2009;2009;2009	0	Not Available	TCGA-04-1655-F24191	6fdc0964-ba27-42bc-bb14-ff4240c2b90e
TCGA-36-1577	FEMALE	783	Serous Cystadenocarcinoma	Ovary	Alive	Stage IIC	G2	0	783			TUMOR FREE		43	Bilateral	TCGA-36-1577	e294b940-2828-499c-be24-47ef6c2e9035	2	-15804	Not Applicable	0	783	TCGA-36-1577-D27879;TCGA-36-1577-D27880	983593fc-3f1f-42ad-b8ae-4c4868fc29b6;1cf4b2f0-97fd-4253-9c7c-3486f0010871	Not Available;Not Available	18;18	84;84	28;28	Carboplatin;Paclitaxel	Not Available;Not Available	8;8	03;03	611;248	mg;mg	ADJUVANT;ADJUVANT	Not Applicable;Not Applicable	Not Available;Not Available	IV;IV	NO;NO	Chemotherapy;Chemotherapy	Not Available;Not Available	1833;744	mg;mg	Not Available;Not Available	2010;2010	Not Available	Not Available	TCGA-36-1577-F27878	210fbda1-7211-4d2b-9eea-f48f0d3f8567
TCGA-25-1632	FEMALE	1799	Serous Cystadenocarcinoma	Ovary	Dead	Stage IV	G3	1	537		Recurrence	WITH TUMOR		68	Bilateral	TCGA-25-1632	c435627c-159d-4a6d-a819-30abac24bf4d	2	-24993	1799	0	1732	TCGA-25-1632-D26738;TCGA-25-1632-D26739;TCGA-25-1632-D26740;TCGA-25-1632-D26736;TCGA-25-1632-D26737	c6464d1a-44a2-400e-b1bb-9d4bf8921c3a;4fe0a3f6-7b53-4115-8a2a-7e3d948ed169;da7c4e92-7f80-4302-aed3-833dc33e5ee6;434bcedc-1d40-4be8-8da0-4c711ac644db;48dd2827-21eb-4711-ac76-adb1caa6884d	Not Available;Not Available;Not Available;Not Available;Not Available	17;17;17;17;17	200;719;719;200;200	82;566;566;82;82	Carboplatin;Carboplatin;Taxol;Doxil;Taxol	Not Available;Not Available;Not Available;Not Available;Not Available	6;6;6;6;6	08;08;08;08;08	Not Available;Not Available;Not Available;Not Available;Not Available	Not Available;Not Available;Not Available;Not Available;Not Available	ADJUVANT;RECURRENCE;RECURRENCE;ADJUVANT;ADJUVANT	Not Applicable;Not Applicable;Not Applicable;Not Applicable;Not Applicable	Not Available;Not Available;Not Available;Not Available;Not Available	IV;IV;IV;IV;IV	NO;NO;NO;NO;NO	Chemotherapy;Chemotherapy;Chemotherapy;Chemotherapy;Chemotherapy	Not Available;Not Available;Not Available;Not Available;Not Available	Not Available;Not Available;Not Available;Not Available;Not Available	Not Available;Not Available;Not Available;Not Available;Not Available	Not Available;Not Available;Not Available;Not Available;Not Available	2009;2009;2009;2009;2009	Not Available	NOT HISPANIC OR LATINO	TCGA-25-1632-F26735	4ba05fe8-8855-4d63-a4a5-e711b36c1ae5
TCGA-25-1325	FEMALE	976	Serous Cystadenocarcinoma	Ovary	Dead	Stage IV	G3	0	976			Not Available		77	Left	TCGA-25-1325	9471bc5e-18da-4356-bb0f-c78edd35ff99	27	-28183	976	0	976																								Not Available	NOT HISPANIC OR LATINO	TCGA-25-1325-F26689	f831163a-bda9-4cae-bb8a-0f303a988a52
TCGA-36-2545	FEMALE	557	Serous Cystadenocarcinoma	Ovary	Alive	Stage IIIA	G3	0	557			TUMOR FREE		42	Bilateral	TCGA-36-2545	f3cd0ca3-8e5d-481b-b28c-619a4123dcd0	18	-15444	Not Applicable	0	557	TCGA-36-2545-D27955;TCGA-36-2545-D27956	f6ca9e7b-80f0-47bd-9a94-dad045441d16;f704b1b9-e697-44d8-9ce9-bd83bccb7ab4	Not Available;Not Available	18;18	145;152	19;19	Carboplatin;Paclitaxel	Not Available;Not Available	8;8	06;06	750;90	mg;mg	ADJUVANT;ADJUVANT	Not Applicable;Not Applicable	Not Available;Not Available	IP;IP;IV	NO;NO	Chemotherapy;Chemotherapy	Not Available;Not Available	5450;2364	mg;mg	Not Available;Not Available	2010;2010	Not Available	Not Available	TCGA-36-2545-F27954	9d76fdcd-128d-4287-8eb5-694eef3b5754
TCGA-24-1463	FEMALE	2218	Serous Cystadenocarcinoma	Ovary	Dead	Stage IIIC	G3	1	971		Recurrence	WITH TUMOR		70	Bilateral	TCGA-24-1463	171f7917-69eb-4a3f-9cc0-0e1dffd412c1	16	-25734	2218	0	2218	TCGA-24-1463-D26012;TCGA-24-1463-D26015;TCGA-24-1463-D26018;TCGA-24-1463-D26020;TCGA-24-1463-D26019;TCGA-24-1463-D26011;TCGA-24-1463-D26010;TCGA-24-1463-D26013;TCGA-24-1463-D26016;TCGA-24-1463-D26014;TCGA-24-1463-D26017	c98d3bb2-e60e-4279-b057-73e950818533;3b745d08-afcc-48eb-8a61-35314bdb9ee8;1d34f8bd-3209-421a-a381-503783bec76d;ed822373-fdf3-4ff0-b016-89d6d3a79706;f8497cc1-74f7-4707-81d7-cd60360edb9b;e6da954d-4e2e-4695-8f5e-e641e746c8e5;cfa3c675-5453-420f-81dd-b11485a4d8de;9a2292f5-c1c1-4c34-baa7-75659a6b31a0;094334ef-5942-45f8-ab0a-d1b1ef328303;a858e299-ace2-4e04-928c-9a5938100d07;6510eb77-3a5d-419f-980b-ca368…	Not Available;Not Available;Not Available;Not Available;Not Available;Not Available;Not Available;Not Available;Not Available;Not Available;Not Available	16;16;16;16;16;16;16;16;16;16;16	1084;1383;1558;1791;1733;123;123;1084;1383;1084;1558	976;1270;1465;1742;1600;18;18;976;1270;976;1465	Taxol;Topotecan;Doxil;Cisplatin;Taxol;Taxol;Carboplatin;Carboplatin;Navelbine;Cisplatin;Gemcitabine	Not Available;Not Available;Not Available;Not Available;Not Available;Not Available;Not Available;Not Available;Not Available;Not Available;Not Available	4;4;4;4;4;4;4;4;4;4;4	6;6;5;2;17;6;6;6;6;2;5	Not Available;Not Available;Not Available;Not Available;Not Available;Not Available;Not Available;Not Available;Not Available;Not Available;Not Available	mg;mg;mg;mg;mg;mg;mg;mg;mg;mg;mg	RECURRENCE;RECURRENCE;PROGRESSION;PROGRESSION;PROGRESSION;ADJUVANT;ADJUVANT;RECURRENCE;RECURRENCE;RECURRENCE;PROGRESSION	Not Applicable;Not Applicable;Not Applicable;Not Applicable;Not Applicable;Not Applicable;Not Applicable;Not Applicable;Not Applicable;Not Applicable;Not Applicable	Not Available;Not Available;Not Available;Not Available;Not Available;Not Available;Not Available;Not Available;Not Available;Not Available;Not Available	IV;IV;IV;IV;IV;IV;IV;IV;IV;IV;IV	NO;NO;NO;NO;NO;NO;NO;NO;NO;NO;NO	Chemotherapy;Chemotherapy;Chemotherapy;Chemotherapy;Chemotherapy;Chemotherapy;Chemotherapy;Chemotherapy;Chemotherapy;Chemotherapy;Chemotherapy	Not Available;Not Available;Not Available;Not Available;Not Available;Not Available;Not Available;Not Available;Not Available;Not Available;Not Available	1660;49.4;277;168;2275;1712;3310;1895;508;172;20684	mg;mg;mg;mg;mg;mg;mg;mg;mg;mg;mg	Not Available;Not Available;Not Available;Not Available;Not Available;Not Available;Not Available;Not Available;Not Available;Not Available;Not Available	2009;2009;2009;2009;2009;2009;2009;2009;2009;2009;2009	Not Available	NOT HISPANIC OR LATINO	TCGA-24-1463-F26009	9b5f38dd-e6ee-4d19-af8b-c1a46f8b00c0
TCGA-30-1891	FEMALE	914	Serous Cystadenocarcinoma	Ovary	Dead	Stage IIIC	G2	1	181		Recurrence	WITH TUMOR		61	Bilateral	TCGA-30-1891	4a2ca7b8-729d-4fab-a6f3-a5d1e5d1f4f3	2	-22344	914	0	914	TCGA-30-1891-D27643;TCGA-30-1891-D27646;TCGA-30-1891-D27647;TCGA-30-1891-D27641;TCGA-30-1891-D27648;TCGA-30-1891-D27650;TCGA-30-1891-D27642;TCGA-30-1891-D27644;TCGA-30-1891-D27651;TCGA-30-1891-D27645;TCGA-30-1891-D27649;TCGA-30-1891-D27652	2c926101-6d5b-42b0-8452-bd5074d5c811;d5f3bf0d-8d21-4914-88a2-107de938f057;ef980ca7-1da5-42fc-85e7-525fe996afd6;99ab0f66-db33-4c20-9813-a34ce14f25d6;a2090fb3-e9be-4240-9b2a-17011087a3de;cd524283-81d7-4569-8af9-8bae2aa59655;cbedad2d-cf2a-4f75-b280-dfa270d0b918;ebea0ddd-3575-40ef-843f-5007f3fde1d6;c5a7f0b8-9eba-4728-9684-dfe16a36d94a;fd0a5766-c375-4546-8acd-af9b0cb09e93;f3619476-e2c4-4284-9f6a-0ac66…	Not Available;Not Available;Not Available;Not Available;Not Available;Not Available;Not Available;Not Available;Not Available;Not Available;Not Available;Not Available	21;21;21;21;21;21;21;21;21;21;21;27	141;526;526;330;638;890;141;386;890;453;694;386	15;460;460;189;554;701;15;358;855;400;666;358	Taxol;Gemcitabine;Carboplatin;Doxil;Cisplatin;Topotecan;Carboplatin;Cytoxan;Navelbine;Gemcitabine;Taxol;Avastin	Not Available;Not Available;Not Available;Not Available;Not Available;Not Available;Not Available;Not Available;Not Available;Not Available;Not Available;Not Available	12;12;12;12;12;12;12;12;12;12;12;1	07;04;04;06;05;12;07;02;06;05;04;Not Available	Not Available;Not Available;Not Available;Not Available;Not Available;Not Available;Not Available;Not Available;Not Available;Not Available;Not Available;Not Available	mg/m2;mg/m2;AUC;mg/m2;mg/m2;mg/m2;AUC;mg;mg/m2;mg/m2;mg/m2;mg/kg	ADJUVANT;PROGRESSION;PROGRESSION;RECURRENCE;PROGRESSION;PROGRESSION;ADJUVANT;PROGRESSION;PROGRESSION;PROGRESSION;PROGRESSION;PROGRESSION	Not Applicable;Not Applicable;Not Applicable;Not Applicable;Not Applicable;Not Applicable;Not Applicable;Not Applicable;Not Applicable;Not Applicable;Not Applicable;Not Applicable	Not Available;Not Available;Not Available;Not Available;Not Available;Not Available;Not Available;Not Available;Not Available;Not Available;Not Available;Not Available	IV;IV;IV;IV;IP;IV;IV;PO;IV;IV;IV;IV	NO;NO;NO;NO;NO;NO;NO;NO;NO;NO;NO;NO	Chemotherapy;Chemotherapy;Chemotherapy;Chemotherapy;Chemotherapy;Chemotherapy;Chemotherapy;Chemotherapy;Chemotherapy;Chemotherapy;Chemotherapy;Targeted Molecular therapy	Not Available;Not Available;Not Available;Not Available;Not Available;Not Available;Not Available;Not Available;Not Available;Not Available;Not Available;Not Available	175;700;5;40;75;3;5;50;25;700;80;10	mg/m2;mg/m2;AUC;mg/m2;mg/m2;mg/m2;AUC;mg;mg/m2;mg/m2;mg/m2;mg/kg	Not Available;Not Available;Not Available;Not Available;Not Available;Not Available;Not Available;Not Available;Not Available;Not Available;Not Available;Not Available	2009;2009;2009;2009;2009;2009;2009;2009;2009;2009;2009;2010	Not Available	NOT HISPANIC OR LATINO	TCGA-30-1891-F27640	8fdc5769-4e01-4a6e-b84d-79e1d6447711
TCGA-OY-A56P	FEMALE	1207	Serous Cystadenocarcinoma	Ovary	Alive	Stage IIIB	G3	1	794		Recurrence	WITH TUMOR		48	Right	TCGA-OY-A56P	260723BF-9620-450D-BF31-F3A45543F9DB	4	-17580	Not Applicable	0	802	TCGA-OY-A56P-D40751;TCGA-OY-A56P-D40752	4C69AC4B-5520-421E-ADEF-0F12EB0C0911;002D674C-302E-4EEE-9324-3C912254F7DC	Not Available;Not Available	27;27	160;160	26;26	Taxotere;Carboplatin	Complete Response;Complete Response	2;2	Not Available;Not Available	Not Available;Not Available	Not Available;Not Available	Not Available;Not Available	Not Applicable;Not Applicable	Not Available;Not Available	Not Available;Not Available	NO;NO	Chemotherapy;Chemotherapy	Not Available;Not Available	Not Available;Not Available	Not Available;Not Available	NO;NO	2013;2013	Not Available	NOT HISPANIC OR LATINO	TCGA-OY-A56P-F56664	81CEF205-14CE-42CB-8DF5-E36D77C2B390
TCGA-04-1337	FEMALE	61	Serous Cystadenocarcinoma	Ovary	Dead	Stage IIIC	G2	0	61			WITH TUMOR		78	Bilateral	TCGA-04-1337	d1e974e7-dd68-40cc-ad06-2b57d964e5a1	26	-28626	61	0	Not Available																								1	NOT HISPANIC OR LATINO	TCGA-04-1337-F23931	08769910-7006-46f3-a58f-3c6a4c34bf1f
TCGA-24-1416	FEMALE	194	Serous Cystadenocarcinoma	Ovary	Alive	Stage IV	G3	0	194			TUMOR FREE		34	Bilateral	TCGA-24-1416	f9793a4b-c0e7-4475-bf80-69543b7ee2f6	1	-12772	Not Applicable	0	194	TCGA-24-1416-D25916;TCGA-24-1416-D25918;TCGA-24-1416-D25917;TCGA-24-1416-D25915	97a17aa1-374b-4024-b74c-8329f9811fc9;9b15719a-2356-4fa2-9a7f-42274bbac4a7;d5c511d8-151f-4705-9bc4-f38116984562;c1f341c3-2bb0-4ba5-be48-5a13a54fc492	Not Available;Not Available;Not Available;Not Available	1;1;1;1	170;170;170;170	16;16;16;16	Cisplatin;Carboplatin;Taxol;Taxotere	Not Available;Not Available;Not Available;Not Available	4;4;4;4	08;08;08;08	Not Available;Not Available;Not Available;Not Available	mg;mg;mg;mg	ADJUVANT;ADJUVANT;ADJUVANT;ADJUVANT	Not Applicable;Not Applicable;Not Applicable;Not Applicable	Not Available;Not Available;Not Available;Not Available	IP;IV;IP;IV;IP;IV;IP;IV	NO;NO;NO;NO	Chemotherapy;Chemotherapy;Chemotherapy;Chemotherapy	Not Available;Not Available;Not Available;Not Available	946;422;647;934	mg;mg;mg;mg	Not Available;Not Available;Not Available;Not Available	2009;2009;2009;2009	Not Available	Not Available	TCGA-24-1416-F25914	cf7ad1d4-c805-41b7-8c74-2e09210bfd7e
TCGA-29-1710	FEMALE	951	Serous Cystadenocarcinoma	Ovary	Dead	Stage IIIC	G2	1	315		Recurrence	WITH TUMOR		54	Bilateral	TCGA-29-1710	4261267c-7042-4c6e-83ed-12fb401003fc	2	-19969	951	0	889	TCGA-29-1710-D27296;TCGA-29-1710-D27295;TCGA-29-1710-D27298;TCGA-29-1710-D27297;TCGA-29-1710-D27304;TCGA-29-1710-D27302;TCGA-29-1710-D27303;TCGA-29-1710-D27305;TCGA-29-1710-D27301;TCGA-29-1710-D27299;TCGA-29-1710-D27300	cb4c7e37-e52e-4fb8-8fa2-b06c4fbe488f;8d6988ea-2c98-4eee-8af3-1f1b8f6e91dd;1870b77f-b3fb-4d51-96e7-40c68e3af351;2f49fa88-c076-48ba-94c2-fa4d9a572e80;84cb2e2e-ce41-4f1d-a1cd-a6d742fb2eab;a00ec514-4300-45f1-801d-4a792374bdf9;d6f9fb02-9165-45de-bb0e-4af029666a8c;e024dbec-28ae-40c1-9e8f-79c02f82ff18;5b6525f0-9d61-446a-83e7-b1a19eff710c;6303ae09-5316-4b1f-9a64-00d5aad22cb6;c217baa5-64ae-4d44-9f6c-3f186…	Not Available;Not Available;Not Available;Not Available;Not Available;Not Available;Not Available;Not Available;Not Available;Not Available;Not Available	10;10;10;10;10;15;15;15;15;15;15	150;150;52;52;52;766;853;653;580;437;542	88;88;31;31;31;682;780;619;556;322;468	Paclitaxel;Carboplatin;Docetaxel;Oxaliplatin;Bevacizumab;Paclitaxel;Topotecan;CEP 11981;Carboplatin;Doxorubincin HCL;Gemcitabine HCL	Not Available;Not Available;Not Available;Not Available;Not Available;Not Available;Not Available;Not Available;Not Available;Not Available;Not Available	12;12;12;12;12;3;3;3;3;3;3	4;4;02;02;Not Available;05;03;Not Available;02;05;03	Not Available;Not Available;Not Available;Not Available;Not Available;Not Available;Not Available;Not Available;Not Available;Not Available;Not Available	mg;mg;mg;mg;mg;mg;mg;Not Available;mg;mg;mg	ADJUVANT;ADJUVANT;ADJUVANT;ADJUVANT;ADJUVANT;PROGRESSION;PROGRESSION;PROGRESSION;PROGRESSION;PROGRESSION;PROGRESSION	Not Applicable;Not Applicable;Not Applicable;Not Applicable;Not Applicable;Not Applicable;Not Applicable;Not Applicable;Not Applicable;Not Applicable;Not Applicable	Not Available;Not Available;Not Available;Not Available;Not Available;Not Available;Not Available;Not Available;Not Available;Not Available;Not Available	IV;IV;IV;IV;Not Available;IV;IV;Not Available;IV;IV;IV	NO;NO;NO;NO;NO;NO;NO;NO;NO;NO;NO	Chemotherapy;Chemotherapy;Chemotherapy;Chemotherapy;Targeted Molecular therapy;Chemotherapy;Chemotherapy;Targeted Molecular therapy;Chemotherapy;Chemotherapy;Chemotherapy	Not Available;Not Available;Not Available;Not Available;Not Available;Not Available;Not Available;Not Available;Not Available;Not Available;Not Available	1200;2790;260;300;1870;310;7;Not Available;700;70;1410	mg;mg;mg;mg;mg;mg;mg;Not Available;mg;mg;mg	Not Available;Not Available;Not Available;Not Available;Not Available;Not Available;Not Available;Not Available;Not Available;Not Available;Not Available	2009;2009;2009;2009;2009;2010;2010;2010;2010;2010;2010	0	Not Available	TCGA-29-1710-F27294	6a1d6bdf-cecf-4c60-a745-f3cf0ebcb1bb
TCGA-13-0720	FEMALE	1355	Serous Cystadenocarcinoma	Ovary	Dead	Stage IIIC	G3	1	292		Recurrence	WITH TUMOR		48	Bilateral	TCGA-13-0720	0d23fa5b-95f8-4626-a4d2-c72ad3cc553b	24	-17799	1355	0	1355	TCGA-13-0720-D24499;TCGA-13-0720-D24500;TCGA-13-0720-D24501	aaffa8ca-1eab-4ffc-89bb-6445124f34b8;a2017b37-9590-4aff-83e9-ec7eca6ee91e;aea4d94c-bf50-4440-a9a6-8e32d97645af	Not Available;Not Available;Not Available	15;15;20	180;180;292	7;7;239	Carboplatin;Paclitaxel;Paclitaxel	Not Available;Not Available;Not Available	4;4;4	8;8;7	Not Available;Not Available;Not Available	Not Available;mg/m2;mg/m2	ADJUVANT;ADJUVANT;ADJUVANT	Not Applicable;Not Applicable;Not Applicable	Not Available;Not Available;Not Available	IV;IV;IV	NO;NO;NO	Chemotherapy;Chemotherapy;Chemotherapy	Not Available;Not Available;Not Available	5;175;560	Not Available;mg/m2;mg/m2	Not Available;Not Available;Not Available	2009;2009;2009	Not Available	NOT HISPANIC OR LATINO	TCGA-13-0720-F24498	7da47e49-e807-4f7f-834c-1ade13aca50c
TCGA-13-1499	FEMALE	3500	Serous Cystadenocarcinoma	Ovary	Alive	Stage IIIC	G3	1	583		Recurrence	WITH TUMOR		56	Not Available	TCGA-13-1499	b25570ed-baca-4e3f-87c6-2ef18119ba49	31	-20668	Not Applicable	0	1168	TCGA-13-1499-D24921;TCGA-13-1499-D24922;TCGA-13-1499-D24920;TCGA-13-1499-D24923;TCGA-13-1499-D24924	b836dca7-cd27-4236-9bb7-f652bd595c60;54dea9e5-ade7-4b1f-abfc-f3b1d49dde54;9b87ff6d-772b-4abc-ad28-e0def040c38f;8c6e1a45-35e8-4195-b1e6-3ffe359242d3;765962d6-30d0-4181-a602-50b728f75df8	Not Available;Not Available;Not Available;Not Available;Not Available	29;29;29;29;29	97;187;97;187;187	76;118;76;118;118	Paclitaxel;Cisplatin;Carboplatin;Paclitaxel;Paclitaxel	Not Available;Not Available;Not Available;Not Available;Not Available	6;6;6;6;6	2;4;2;4;4	Not Available;Not Available;Not Available;Not Available;Not Available	mg/m2;mg/m2;Not Available;mg/m2;mg/m2	ADJUVANT;ADJUVANT;ADJUVANT;ADJUVANT;ADJUVANT	Not Applicable;Not Applicable;Not Applicable;Not Applicable;Not Applicable	Not Available;Not Available;Not Available;Not Available;Not Available	IV;IP;IV;IV;IP;IP	NO;NO;NO;NO;NO	Chemotherapy;Chemotherapy;Chemotherapy;Chemotherapy;Chemotherapy	Not Available;Not Available;Not Available;Not Available;Not Available	135;75;6;135;60	mg/m2;mg/m2;Not Available;mg/m2;mg/m2	Not Available;Not Available;Not Available;Not Available;Not Available	2009;2009;2009;2009;2009	Not Available	NOT HISPANIC OR LATINO	TCGA-13-1499-F24919;TCGA-13-1499-F72649	23f13a5e-8099-432a-a6a2-a3e2d887b8ba;A4129888-255B-4F68-8329-CA4D6FFFB2D6
TCGA-24-1551	FEMALE	1579	Serous Cystadenocarcinoma	Ovary	Dead	Stage IIIC	G3	1	764		Recurrence	WITH TUMOR		53	Bilateral	TCGA-24-1551	499a9b57-ee1a-4012-bbab-c6ad955b5e0a	13	-19661	1579	0	1579	TCGA-24-1551-D26142;TCGA-24-1551-D26143;TCGA-24-1551-D26146;TCGA-24-1551-D26140;TCGA-24-1551-D26144;TCGA-24-1551-D26141;TCGA-24-1551-D26145	ec427308-ea67-43e0-9b4e-a4c9e2db1d3e;9df28b30-f8dc-426a-865e-15ce20302858;a38abeb3-1386-434d-b0b9-71f5beff97c4;b10b8c3a-9710-41f3-bd63-884d87cc52a3;cb2ba36d-6d1b-4a6a-b054-158386921e0c;76c2ecc7-ea48-46b9-8b1f-e4f6186921fc;7960a8b0-06e3-44a3-886f-bfae511a0a3d	Not Available;Not Available;Not Available;Not Available;Not Available;Not Available;Not Available	13;13;13;13;13;13;13	790;975;1549;135;1254;135;1437	790;842;1549;10;1227;10;1289	Topotecan;Carboplatin;Doxil;Carboplatin;Doxil;Taxol;Taxol	Not Available;Not Available;Not Available;Not Available;Not Available;Not Available;Not Available	5;5;5;5;5;5;5	01;06;01;07;02;07;19	Not Available;Not Available;Not Available;Not Available;Not Available;Not Available;Not Available	mg;mg;mg;mg;mg;mg;mg	RECURRENCE;RECURRENCE;PROGRESSION;ADJUVANT;RECURRENCE;ADJUVANT;RECURRENCE	Not Applicable;Not Applicable;Not Applicable;Not Applicable;Not Applicable;Not Applicable;Not Applicable	Not Available;Not Available;Not Available;Not Available;Not Available;Not Available;Not Available	IV;IV;IV;IV;IV;IV;IV	NO;NO;NO;NO;NO;NO;NO	Chemotherapy;Chemotherapy;Chemotherapy;Chemotherapy;Chemotherapy;Chemotherapy;Chemotherapy	Not Available;Not Available;Not Available;Not Available;Not Available;Not Available;Not Available	12.5;3600;80;4140;160;2080;3020	mg;mg;mg;mg;mg;mg;mg	Not Available;Not Available;Not Available;Not Available;Not Available;Not Available;Not Available	2009;2009;2009;2009;2009;2009;2009	1	Not Available	TCGA-24-1551-F26139	bbe90a89-5f83-4b5d-9ef9-9a9e8a5159fd
TCGA-29-1775	FEMALE	376	Serous Cystadenocarcinoma	Ovary	Alive	Stage IIIC	G2	1	341		Recurrence	WITH TUMOR		51	Bilateral	TCGA-29-1775	a4a3fca9-723a-47f5-a49d-b3acb71c04a7	2	-18943	Not Applicable	0	376	TCGA-29-1775-D27399;TCGA-29-1775-D27400;TCGA-29-1775-D27401;TCGA-29-1775-D27402;TCGA-29-1775-D27406;TCGA-29-1775-D27403;TCGA-29-1775-D27405;TCGA-29-1775-D27404;TCGA-29-1775-D27407	39863e9b-48dc-497d-bc6f-7ddaf6d74979;3d88301d-c73c-4314-b25e-8d6c5c85050d;d81cc8d4-ee3e-44c2-9775-1336cc2c23a5;ac4fe03f-ca40-4a24-96fe-592c7547f834;2eb3063c-17a4-467e-8041-172da15d04d5;a1f3b59c-bbe7-4421-a1b4-a70684037a52;fa8fc828-6c75-47d5-927d-86af2fa3cfb2;4e0514c2-918e-49ce-b00d-fda19f334ef1;0754f353-8c2d-477a-aa6c-ebb7d3191088	Not Available;Not Available;Not Available;Not Available;Not Available;Not Available;Not Available;Not Available;Not Available	18;18;18;10;10;10;10;10;10	166;166;320;432;604;355;467;377;576	29;29;114;355;576;355;397;377;530	Paclitaxel;Carboplatin;Bevacizumab vs Placebo;Cisplatin;Doxil;Paclitaxel;Gemcitabine HCL;Taxotere;Tamoxifen	Not Available;Not Available;Not Available;Not Available;Not Available;Not Available;Not Available;Not Available;Not Available	12;12;12;5;5;5;5;5;5	06;06;10;04;02;01;05;01;Not Available	Not Available;Not Available;Not Available;Not Available;Not Available;Not Available;Not Available;Not Available;Not Available	mg;mg;mg;mg/m2;mg/m2;Not Available;mg;mg;mg	ADJUVANT;ADJUVANT;ADJUVANT;RECURRENCE;PROGRESSION;RECURRENCE;RECURRENCE;RECURRENCE;PROGRESSION	Not Applicable;Not Applicable;Not Applicable;Not Applicable;Not Applicable;Not Applicable;Not Applicable;Not Applicable;Not Applicable	Not Available;Not Available;Not Available;Not Available;Not Available;Not Available;Not Available;Not Available;Not Available	IV;IV;IV;IP;IV;IV;IV;IV;Not Available	NO;NO;NO;NO;YES;NO;NO;NO;Not Available	Chemotherapy;Chemotherapy;Chemotherapy;Chemotherapy;Chemotherapy;Chemotherapy;Chemotherapy;Chemotherapy;Hormone Therapy	Not Available;Not Available;Not Available;Not Available;Not Available;Not Available;Not Available;Not Available;Not Available	2040;4290;11694;100;40;Not Available;1600;120;20	mg;mg;mg;mg/m2;mg/m2;Not Available;mg;mg;mg	Not Available;Not Available;Not Available;Not Available;Not Available;Not Available;Not Available;Not Available;Not Available	2009;2009;2009;2010;2010;2010;2010;2010;2010	0	Not Available	TCGA-29-1775-F27398	5beb42b4-f148-4115-849e-6d5be911a460
TCGA-61-2110	FEMALE	1354	Serous Cystadenocarcinoma	Ovary	Dead	Stage IIIC	Not Available	1	213		Recurrence	WITH TUMOR		56	Bilateral	TCGA-61-2110	88180134-710f-46ea-9b06-5e5d860d6d9f	4	-20718	1354	0	1354	TCGA-61-2110-D28459;TCGA-61-2110-D28457;TCGA-61-2110-D28458;TCGA-61-2110-D28462;TCGA-61-2110-D28463;TCGA-61-2110-D28460;TCGA-61-2110-D28461;TCGA-61-2110-D28464	cf284d67-59f2-44d4-ac77-0aaaa1a593e9;e104ed61-6ac7-4c6c-ad84-389d00289ed8;2b91b2c6-dd7b-4b55-a31e-a5d0b54914e4;83713042-6ff6-4fb5-af9f-d052de0e9ef4;59347194-a069-4b01-830f-b2a17362f69d;b7c2bc59-6246-44da-afb4-445792bf317e;106ff996-b75a-4830-a231-a7812b2ba5bc;22c34e90-e390-42af-afe8-975c0b18cac9	Not Available;Not Available;Not Available;Not Available;Not Available;Not Available;Not Available;Not Available	4;4;4;4;4;4;4;4	770;161;161;1239;1354;930;1089;356	661;20;20;1089;459;774;979;244	Topotecan;Carboplatin;Taxol;Gemzar;Tamoxifen;Carbplatin;Doxil;IL 2	Not Available;Not Available;Not Available;Not Available;Not Available;Not Available;Not Available;Not Available	12;12;12;12;12;12;12;12	05;06;06;05;Not Available;06;05;Not Available	Not Available;Not Available;Not Available;Not Available;Not Available;Not Available;Not Available;Not Available	mg;mg;mg;mg;mg;mg;mg;Not Available	RECURRENCE;ADJUVANT;ADJUVANT;RECURRENCE;PROGRESSION;RECURRENCE;RECURRENCE;PROGRESSION	Not Applicable;Not Applicable;Not Applicable;Not Applicable;Not Applicable;Not Applicable;Not Applicable;Not Applicable	Not Available;Not Available;Not Available;Not Available;Not Available;Not Available;Not Available;Not Available	IV;IV;IV;IV;PO;IV;IV;IP	NO;NO;NO;NO;NO;NO;NO;NO	Chemotherapy;Chemotherapy;Chemotherapy;Chemotherapy;Hormone Therapy;Chemotherapy;Chemotherapy;Immunotherapy	Not Available;Not Available;Not Available;Not Available;Not Available;Not Available;Not Available;Not Available	28;2970;1620;12640;10;3900;315;16	mg;mg;mg;mg;mg;mg;mg;Not Available	Not Available;Not Available;Not Available;Not Available;Not Available;Not Available;Not Available;Not Available	2009;2009;2009;2009;2009;2009;2009;2009	Not Available	NOT HISPANIC OR LATINO	TCGA-61-2110-F28456	47c8d668-e766-409d-b4bd-eb05a7befb17
TCGA-24-0966	FEMALE	232	Serous Cystadenocarcinoma	Ovary	Alive	Stage IIIC	G3	0	232			WITH TUMOR		78	Bilateral	TCGA-24-0966	fef1696c-a8f4-4db6-8615-e486522baaaa	24	-28529	Not Applicable	0	232	TCGA-24-0966-D25877;TCGA-24-0966-D25876;TCGA-24-0966-D25878	d59ae257-aaed-4b32-b2ee-4819c0c1f330;6e46e95c-59bd-4b05-aa53-4d4ab9726c05;b56ccf47-30cb-49bc-a45b-5d2c2d1617f1	Not Available;Not Available;Not Available	27;27;30	120;120;120	21;21;71	carboplatin;paclitaxel;Avastin/bevacizumab/placebo	Not Available;Not Available;Not Available	3;3;3	5;5;Not Available	Not Available;Not Available;Not Available	mg;mg;mg	ADJUVANT;ADJUVANT;ADJUVANT	Not Applicable;Not Applicable;Not Applicable	Not Available;Not Available;Not Available	IV;IV;Not Available	Not Available;Not Available;Not Available	Chemotherapy;Chemotherapy;Targeted Molecular therapy	Not Available;Not Available;Not Available	2456;1390;2457	mg;mg;mg	Not Available;Not Available;Not Available	2009;2009;2009	Not Available	NOT HISPANIC OR LATINO	TCGA-24-0966-F25875	23c1520b-680f-4177-ab0b-e2188bbe2e81
TCGA-36-2549	FEMALE	184	Serous Cystadenocarcinoma	Ovary	Alive	Stage IIC	G3	0	184			TUMOR FREE		54	Bilateral	TCGA-36-2549	9815ab87-454d-4dfc-8b3d-4b35af32d764	18	-20076	Not Applicable	0	184	TCGA-36-2549-D27967;TCGA-36-2549-D27968	45c7c8d0-307f-4398-800e-680320d860a1;5a6c332e-d031-47ff-8289-63c802a63356	Not Available;Not Available	18;18	181;181	41;41	Carboplatin;Paclitaxel	Not Available;Not Available	8;8	06;06	710;309	mg;mg	ADJUVANT;ADJUVANT	Not Applicable;Not Applicable	Not Available;Not Available	IV;IV	NO;NO	Chemotherapy;Chemotherapy	Not Available;Not Available	4400;1854	mg;mg	Not Available;Not Available	2010;2010	Not Available	Not Available	TCGA-36-2549-F27966	6c2295e6-1597-4bc3-b5a4-18a051398009
TCGA-31-1959	FEMALE	67	Serous Cystadenocarcinoma	Ovary	Alive	Stage IV	G2	0	67			WITH TUMOR		49	Bilateral	TCGA-31-1959	186d40cd-624c-4016-a497-b30c892d393c	20	-18247	Not Applicable	0	67	TCGA-31-1959-D27716;TCGA-31-1959-D27717	5b3d6d1e-fcaa-435b-b73d-24586385e15c;47c2d5b6-061b-4fb7-be57-74717e442a52	Not Available;Not Available	20;20	Not Available;Not Available	26;26	Carboplatin;Paciltaxel	Not Available;Not Available	10;10	Not Available;Not Available	Not Available;Not Available	Not Available;Not Available	ADJUVANT;ADJUVANT	Not Applicable;Not Applicable	Not Available;Not Available	IV;IV	YES;YES	Chemotherapy;Chemotherapy	Not Available;Not Available	Not Available;Not Available	Not Available;Not Available	Not Available;Not Available	2009;2009	Not Available	NOT HISPANIC OR LATINO	TCGA-31-1959-F27715	2550cdb2-11f6-4349-91e8-39780c044dbd
TCGA-13-1412	FEMALE	984	Serous Cystadenocarcinoma	Ovary	Dead	Stage IV	G3	1	409			TUMOR FREE		41	Bilateral	TCGA-13-1412	44493c23-82e9-4d9f-8e3c-7b3f9ae44970	20	-15119	Not Applicable	0	162	TCGA-13-1412-D24834;TCGA-13-1412-D24833;TCGA-13-1412-D24836;TCGA-13-1412-D24837;TCGA-13-1412-D24835	8b14d588-2044-4f90-9a23-edda2259f27a;0a3e9870-60d6-4529-9570-b86361452929;2f960c5b-fc96-4100-91d5-62689dac2d2b;e8f007f4-1cc1-4eea-8b14-300ff06a3b8a;65181bc8-d203-458a-9869-e6c89c79a77b	Not Available;Not Available;Not Available;Not Available;Not Available	30;30;1;1;1	121;121;205;205;205	37;37;156;156;156	Paclitaxel;Carboplatin;Paclitaxel;Paclitaxel;Cisplatin	Not Available;Not Available;Not Available;Not Available;Not Available	6;6;2;2;2	5;5;3;3;3	Not Available;Not Available;135;60;75	mg/m2;Not Available;mg/m2;mg/m2;mg/m2	ADJUVANT;ADJUVANT;ADJUVANT;ADJUVANT;ADJUVANT	Not Applicable;Not Applicable;Not Applicable;Not Applicable;Not Applicable	Not Available;Not Available;Not Available;Not Available;Not Available	IV;IV;IV;IP;IP	NO;NO;NO;NO;NO	Chemotherapy;Chemotherapy;Chemotherapy;Chemotherapy;Chemotherapy	Not Available;Not Available;Not Available;Not Available;Not Available	175;5;Not Available;Not Available;Not Available	mg/m2;Not Available;mg/m2;mg/m2;mg/m2	Not Available;Not Available;Not Available;Not Available;Not Available	2009;2009;2010;2010;2010	Not Available	NOT HISPANIC OR LATINO	TCGA-13-1412-F24832;TCGA-13-1412-F72669	a831a5dd-ab90-4720-9a9d-91228986100a;5857F9CC-1A66-4E21-8E2E-E6FDD504F2A5
TCGA-59-2363	FEMALE	165	Serous Cystadenocarcinoma	Ovary	Alive	Stage IIIA	G3	0	165			TUMOR FREE		40	Bilateral	TCGA-59-2363	f4d95c8e-fb84-46ca-acc0-827015cc9d0a	12	Not Available	Not Applicable	0	165	TCGA-59-2363-D28116;TCGA-59-2363-D28117	370376ef-e337-4f4a-99e9-1946fb317d53;3947e570-c2af-4b0d-8d63-fb7eb1a976ca	Not Available;Not Available	15;15	Not Available;Not Available	Not Available;Not Available	carbopaltin;Taxol	Not Available;Not Available	3;3	Not Available;Not Available	Not Available;Not Available	Not Available;Not Available	ADJUVANT;ADJUVANT	Not Applicable;Not Applicable	Not Available;Not Available	Not Available;Not Available	Not Available;Not Available	Chemotherapy;Chemotherapy	Not Available;Not Available	Not Available;Not Available	Not Available;Not Available	Not Available;Not Available	2010;2010	Not Available	NOT HISPANIC OR LATINO	TCGA-59-2363-F28115	b9fa6c71-a686-47cc-8b85-ba5cca27a399
TCGA-24-1603	FEMALE	2742	Serous Cystadenocarcinoma	Ovary	Dead	Stage IIIB	G3	1	992		Recurrence	WITH TUMOR		53	Bilateral	TCGA-24-1603	19427350-619b-4b9c-a3ba-37f667bb2843	13	-19681	2742	0	2742	TCGA-24-1603-D26288;TCGA-24-1603-D26296;TCGA-24-1603-D26289;TCGA-24-1603-D26294;TCGA-24-1603-D26295;TCGA-24-1603-D26287;TCGA-24-1603-D26292;TCGA-24-1603-D26290;TCGA-24-1603-D26286;TCGA-24-1603-D26285;TCGA-24-1603-D26293;TCGA-24-1603-D26297;TCGA-24-1603-D26291	5d9979f4-99a7-405a-93ed-dabecce5eacd;d4130ac0-ad5f-40f4-bc29-77b8a859e40b;6d56fba5-bc5f-4161-b73f-5a4fa8ee9809;040db0b8-aff7-4a23-91e1-26379fb0e44c;38ef06ab-1145-47bd-b309-658243311e65;faecc8ec-f46c-4ea3-a013-3370d0692293;087cc90f-f414-4d12-b7a8-7c94798e1b4c;931b22e6-c6ab-4846-b1a4-4a22273d74c1;3dcddc28-0f92-48c0-81ee-683913402b4d;29019868-73c5-442e-93bb-8e83ea1504ae;8366500b-f54e-499d-98e4-e4678…	Not Available;Not Available;Not Available;Not Available;Not Available;Not Available;Not Available;Not Available;Not Available;Not Available;Not Available;Not Available;Not Available	13;13;13;13;13;13;13;13;13;13;13;13;13	1181;2629;1516;2203;2448;1181;1991;1516;Not Available;Not Available;1991;2629;1853	1107;2568;1356;2022;2234;1107;1899;1356;Not Available;Not Available;1899;2629;Not Available	Taxol;Topotecan;Carboplatin;Taxol;Carboplatin;Carboplatin;Gemzar;Taxol;Carboplatin;Taxol;Doxil;Taxotere;Topotecan	Not Available;Not Available;Not Available;Not Available;Not Available;Not Available;Not Available;Not Available;Not Available;Not Available;Not Available;Not Available;Not Available	5;5;5;5;5;5;5;5;5;5;5;5;5	06;Not Available;08;28;9;06;09;08;06;06;09;01;09	Not Available;Not Available;Not Available;Not Available;Not Available;Not Available;Not Available;Not Available;Not Available;Not Available;Not Available;Not Available;Not Available	Not Available;Not Available;Not Available;Not Available;Not Available;Not Available;Not Available;Not Available;Not Available;Not Available;Not Available;Not Available;Not Available	RECURRENCE;PROGRESSION;RECURRENCE;PROGRESSION;PROGRESSION;RECURRENCE;PROGRESSION;RECURRENCE;ADJUVANT;ADJUVANT;PROGRESSION;PROGRESSION;PROGRESSION	Not Applicable;Not Applicable;Not Applicable;Not Applicable;Not Applicable;Not Applicable;Not Applicable;Not Applicable;Not Applicable;Not Applicable;Not Applicable;Not Applicable;Not Applicable	Not Available;Not Available;Not Available;Not Available;Not Available;Not Available;Not Available;Not Available;Not Available;Not Available;Not Available;Not Available;Not Available	IV;IV;IV;IV;IV;IV;IV;IV;IV;IV;IV;IV;IV	NO;NO;NO;NO;NO;NO;NO;NO;Not Available;Not Available;NO;NO;NO	Chemotherapy;Chemotherapy;Chemotherapy;Chemotherapy;Chemotherapy;Chemotherapy;Chemotherapy;Chemotherapy;Chemotherapy;Chemotherapy;Chemotherapy;Chemotherapy;Chemotherapy	Not Available;Not Available;Not Available;Not Available;Not Available;Not Available;Not Available;Not Available;Not Available;Not Available;Not Available;Not Available;Not Available	Not Available;Not Available;Not Available;Not Available;Not Available;Not Available;Not Available;Not Available;Not Available;Not Available;Not Available;Not Available;Not Available	Not Available;Not Available;Not Available;Not Available;Not Available;Not Available;Not Available;Not Available;Not Available;Not Available;Not Available;Not Available;Not Available	Not Available;Not Available;Not Available;Not Available;Not Available;Not Available;Not Available;Not Available;Not Available;Not Available;Not Available;Not Available;Not Available	2009;2009;2009;2009;2009;2009;2009;2009;2009;2009;2009;2009;2009	Not Available	Not Available	TCGA-24-1603-F26284	7aa0d9f9-ecbe-4159-89a9-08c599697834
TCGA-09-1672	FEMALE	178	Serous Cystadenocarcinoma	Ovary	Alive	Stage IIIC	G1	0	178			TUMOR FREE		78	Right	TCGA-09-1672	66dc6379-a98b-498f-8109-e3a811d043ea	2	-28556	Not Applicable	0	178	TCGA-09-1672-D24315;TCGA-09-1672-D24316	0374f5fb-511c-41e7-a7b1-0438a5f9110a;39aa2254-337c-461d-97c1-1733b934db3d	Not Available;Not Available	6;6	Not Available;Not Available	30;30	Taxol;Carboplatin	Not Available;Not Available	8;8	Not Available;Not Available	Not Available;Not Available	Not Available;Not Available	ADJUVANT;ADJUVANT	Not Applicable;Not Applicable	Not Available;Not Available	IV;IV	NO;NO	Chemotherapy;Chemotherapy	Not Available;Not Available	Not Available;Not Available	Not Available;Not Available	Not Available;Not Available	2009;2009	Not Available	NOT HISPANIC OR LATINO	TCGA-09-1672-F24314	a4b07c67-1c4e-4d96-97dc-9cc364302992
TCGA-57-1993	FEMALE	763	Serous Cystadenocarcinoma	Ovary	Alive	Stage IIIC	G3	0	763			TUMOR FREE		56	Bilateral	TCGA-57-1993	15fc17cd-d073-4f81-a4a2-2db3cb9d7069	7	-20498	Not Applicable	0	763	TCGA-57-1993-D28093;TCGA-57-1993-D28094	b07a8455-73a1-4571-bd1b-3e468ec2f2f8;6953096a-c7ed-4c25-b134-8dca8f12f670	Not Available;Not Available	9;9	Not Available;Not Available	62;62	Carboplatin;Taxol	Not Available;Not Available	2;2	Not Available;Not Available	Not Available;Not Available	Not Available;Not Available	ADJUVANT;ADJUVANT	Not Applicable;Not Applicable	Not Available;Not Available	Not Available;Not Available	NO;NO	Chemotherapy;Chemotherapy	Not Available;Not Available	Not Available;Not Available	Not Available;Not Available	Not Available;Not Available	2010;2010	Not Available	NOT HISPANIC OR LATINO	TCGA-57-1993-F28092	c5c65b87-f672-4576-8cc3-10552aea8459
TCGA-04-1346	FEMALE	1993	Serous Cystadenocarcinoma	Ovary	Alive	Stage IIIC	G2	0	1993			TUMOR FREE		73	Bilateral	TCGA-04-1346	25a0a9e6-4f5b-45d8-8f34-abfd31d5ff1b	26	-26865	Not Applicable	0	1993																								Not Available	NOT HISPANIC OR LATINO	TCGA-04-1346-F23959	da328292-e520-498b-aaaa-60337d841505
TCGA-13-1409	FEMALE	1742	Serous Cystadenocarcinoma	Ovary	Dead	Stage IIIC	G3	1	690			WITH TUMOR		73	Not Available	TCGA-13-1409	18e0e996-8f23-4f53-94a5-dde38b550863	20	-26836	Not Applicable	0	208	TCGA-13-1409-D24819;TCGA-13-1409-D24820	fdbbf073-c52a-4972-b714-ec92cf255e88;532deb83-2d9a-4d0c-a56a-1eeec028d682	Not Available;Not Available	30;30	Not Available;Not Available	94;94	Carboplatin;Paclitaxel	Not Available;Not Available	6;6	6;6	Not Available;Not Available	Not Available;mg/m2	ADJUVANT;ADJUVANT	Not Applicable;Not Applicable	Not Available;Not Available	IV;IV	YES;YES	Chemotherapy;Chemotherapy	Not Available;Not Available	5;175	Not Available;mg/m2	Not Available;Not Available	2009;2009	Not Available	NOT HISPANIC OR LATINO	TCGA-13-1409-F24818;TCGA-13-1409-F72660	581da1f9-2a0c-42d4-953b-7a311eeacbb6;9D019620-151B-4004-9B02-F9AFBC121F16
TCGA-61-1998	FEMALE	168	Serous Cystadenocarcinoma	Ovary	Alive	Stage IIIC	G3	0	168			WITH TUMOR		48	Bilateral	TCGA-61-1998	565d06a1-3640-4274-8fb3-8cad7e578876	8	-17855	Not Applicable	0	168	TCGA-61-1998-D28307;TCGA-61-1998-D28308;TCGA-61-1998-D28309	bf3290fb-d43f-40f0-b67f-584975a56c14;32b34fbe-8dba-4a98-8abb-fdabf73ff607;d1901164-9c69-4aa7-bfc2-bf9a93581e24	Not Available;Not Available;Not Available	8;8;8	77;Not Available;Not Available	10;52;52	Cisplatin;Carboplatin;Taxol	Not Available;Not Available;Not Available	12;12;12	02;06;06	Not Available;Not Available;Not Available	mg;AUC;mg/m2	ADJUVANT;ADJUVANT;ADJUVANT	Not Applicable;Not Applicable;Not Applicable	Not Available;Not Available;Not Available	IV;IV;IV	NO;YES;YES	Chemotherapy;Chemotherapy;Chemotherapy	Not Available;Not Available;Not Available	188;6;175	mg;AUC;mg/m2	Not Available;Not Available;Not Available	2009;2009;2009	Not Available	NOT HISPANIC OR LATINO	TCGA-61-1998-F28306	0d0da8b8-e9f8-4dbb-9a7f-ff76d2dc734f
TCGA-25-2392	FEMALE	31	Serous Cystadenocarcinoma	Ovary	Dead	Stage IV	G3	0	31			Not Available		75	Bilateral	TCGA-25-2392	7413c891-f74e-456f-bc70-69c83fb53c70	5	-27667	31	0	31																								Not Available	NOT HISPANIC OR LATINO	TCGA-25-2392-F26801	d9ebef02-cd9d-4ec0-851a-3192d9744cd5
TCGA-09-1675	FEMALE	2967	Serous Cystadenocarcinoma	Ovary	Alive	Stage IC	G2	0	2967			TUMOR FREE		50	Left	TCGA-09-1675	0fc8777c-8f12-472f-a0ea-085139b35d1f	2	-18596	Not Applicable	0	2967	TCGA-09-1675-D24327;TCGA-09-1675-D24330;TCGA-09-1675-D24328;TCGA-09-1675-D24329	b14864f9-e7b2-4987-ac25-a5804bc74634;6af7d774-e00a-4411-bb4b-30be83bfa4ad;855b5a4b-8752-46eb-ad51-3917f471d8e9;c83250a3-fa1a-4fba-9d68-7656b0ae9ff0	Not Available;Not Available;Not Available;Not Available	6;6;6;6	187;187;68;68	75;75;54;54	Carboplatin;Taxol;Carboplatin;Taxol	Not Available;Not Available;Not Available;Not Available	8;8;8;8	15;15;3;3	Not Available;Not Available;Not Available;Not Available	mg;mg/m2;mg;mg/m2	ADJUVANT;ADJUVANT;ADJUVANT;ADJUVANT	Not Applicable;Not Applicable;Not Applicable;Not Applicable	Not Available;Not Available;Not Available;Not Available	IV;IV;IV;IV	NO;NO;NO;NO	Chemotherapy;Chemotherapy;Chemotherapy;Chemotherapy	Not Available;Not Available;Not Available;Not Available	190;80;190;60	mg;mg/m2;mg;mg/m2	Not Available;Not Available;Not Available;Not Available	2009;2009;2009;2009	Not Available	NOT HISPANIC OR LATINO	TCGA-09-1675-F24326	b6bc98b0-daf9-4803-aed3-b2fa0751638a
TCGA-04-1530	FEMALE	3622	Serous Cystadenocarcinoma	Ovary	Dead	Stage IIIC	G3	1	350		Recurrence	WITH TUMOR		68	Bilateral	TCGA-04-1530	42b3dfa3-152f-4ab7-ac9f-988c7f473bea	2	-25013	3622	0	Not Available	TCGA-04-1530-D24105;TCGA-04-1530-D24107;TCGA-04-1530-D24106;TCGA-04-1530-D24108	00ca66ba-5726-4770-97c9-3cdcb1322fe4;e53d3505-76db-4d22-a0e5-968e706f3e0e;b92c8c57-7fe6-4ada-b32c-ec7b254b1c1c;e9327dc6-1775-4aff-bce4-b32ea0f465bd	Not Available;Not Available;Not Available;Not Available	9;9;9;9	153;550;153;550	43;382;43;382	Taxol;Taxol;Cisplatin;Carboplatin	Not Available;Not Available;Not Available;Not Available	11;11;11;11	06;06;06;06	Not Available;Not Available;Not Available;Not Available	mg;mg;mg;mg	ADJUVANT;RECURRENCE;ADJUVANT;RECURRENCE	Not Applicable;Not Applicable;Not Applicable;Not Applicable	Not Available;Not Available;Not Available;Not Available	IV;IV;IV;IV	NO;NO;NO;NO	Chemotherapy;Chemotherapy;Chemotherapy;Chemotherapy	Not Available;Not Available;Not Available;Not Available	1218;1200;678;2490	mg;mg;mg;mg	Not Available;Not Available;Not Available;Not Available	2009;2009;2009;2009	Not Available	NOT HISPANIC OR LATINO	TCGA-04-1530-F24104	ad540bc7-095f-4f96-ad41-0981da3fcb0e
TCGA-24-1550	FEMALE	1249	Serous Cystadenocarcinoma	Ovary	Dead	Stage IIIC	G3	1	892		Recurrence	WITH TUMOR		49	Left	TCGA-24-1550	1858b58f-fdf4-413c-9c29-96ae85b88a74	13	-18049	1249	0	1249	TCGA-24-1550-D26133;TCGA-24-1550-D26134;TCGA-24-1550-D26131;TCGA-24-1550-D26136;TCGA-24-1550-D26132;TCGA-24-1550-D26135;TCGA-24-1550-D26137	816567f8-959f-4ac6-881e-af02c374aea7;57b1a47e-8ee1-430f-947c-2aa9308fe0a5;216cba1d-50e3-40b2-83a8-1c94cf9b2c59;4a1b352e-113a-4b57-8c5d-a68cd3a08e2e;4ab59025-4c19-46a1-8a2f-10774327df1b;06c0b8ce-5bc9-4141-b182-d5e9235ad517;c32b99a6-9f34-4281-9364-de59a8a6f66c	Not Available;Not Available;Not Available;Not Available;Not Available;Not Available;Not Available	13;13;13;13;13;13;13	965;1107;174;1211;174;1211;1233	902;986;8;1164;8;1164;1233	Topotecan;Carboplatin;Taxol;Carboplatin;Cisplatin;Taxol;Doxil	Not Available;Not Available;Not Available;Not Available;Not Available;Not Available;Not Available	5;5;5;5;5;5;5	04;06;07;03;07;03;01	Not Available;Not Available;Not Available;Not Available;Not Available;Not Available;Not Available	mg;mg;mg;mg;mg;mg;mg	RECURRENCE;PROGRESSION;ADJUVANT;PROGRESSION;ADJUVANT;PROGRESSION;PROGRESSION	Not Applicable;Not Applicable;Not Applicable;Not Applicable;Not Applicable;Not Applicable;Not Applicable	Not Available;Not Available;Not Available;Not Available;Not Available;Not Available;Not Available	IV;IV;IV;IV;IV;IV;IV	NO;NO;NO;NO;NO;NO;NO	Chemotherapy;Chemotherapy;Chemotherapy;Chemotherapy;Chemotherapy;Chemotherapy;Chemotherapy	Not Available;Not Available;Not Available;Not Available;Not Available;Not Available;Not Available	405;4200;2070;1950;165;837;64	mg;mg;mg;mg;mg;mg;mg	Not Available;Not Available;Not Available;Not Available;Not Available;Not Available;Not Available	2009;2009;2009;2009;2009;2009;2009	1	Not Available	TCGA-24-1550-F26130	5bda2645-5465-4ed5-a000-c378ffe3ba62
TCGA-04-1357	FEMALE		Serous Cystadenocarcinoma	Ovary		Stage IIIB	G3	0				Not Available		52	Not Available	TCGA-04-1357	feda41d8-ca56-425d-b149-4d5485328107	26	-18999	Not Applicable	0	Not Available																								Not Available	Not Available	TCGA-04-1357-F24009	111f374e-4892-4400-8dd3-60c2e3d4f213
TCGA-24-1552	FEMALE	1259	Serous Cystadenocarcinoma	Ovary	Dead	Stage IIIC	G3	1	403		Recurrence	WITH TUMOR		77	Left	TCGA-24-1552	62379be5-13f0-474b-94d3-6f944ec4ee96	13	-28129	1259	0	1259	TCGA-24-1552-D26150;TCGA-24-1552-D26155;TCGA-24-1552-D26152;TCGA-24-1552-D26154;TCGA-24-1552-D26151;TCGA-24-1552-D26153;TCGA-24-1552-D26149	ecf05a0e-1a8f-4c2b-9370-808c3f91f4ba;8712ebf0-ac5c-4247-9ef9-0182dfcbe756;2c4df149-3420-49af-ac83-0c6141b6cb6e;f3e0bfc1-9550-4386-a99e-ea615344961c;c1aee209-7e03-4455-8b8d-d94c99b25758;b0251e28-66c8-4d66-8438-ae12f29c7ff0;98b74f89-c75a-4ca7-93bf-6870cf515821	Not Available;Not Available;Not Available;Not Available;Not Available;Not Available;Not Available	13;13;13;13;13;13;13	265;1170;851;1030;587;1030;265	53;1044;728;876;479;876;53	Taxol;Carboplatin;Doxil;Amitostine;Topotecan;Taxol;Carboplatin	Not Available;Not Available;Not Available;Not Available;Not Available;Not Available;Not Available	5;5;5;5;5;5;5	06;05;05;04;Not Available;04;06	Not Available;Not Available;Not Available;Not Available;Not Available;Not Available;Not Available	Not Available;mg;mg;mg;Not Available;mg;Not Available	ADJUVANT;PROGRESSION;PROGRESSION;PROGRESSION;RECURRENCE;PROGRESSION;ADJUVANT	Not Applicable;Not Applicable;Not Applicable;Not Applicable;Not Applicable;Not Applicable;Not Applicable	Not Available;Not Available;Not Available;Not Available;Not Available;Not Available;Not Available	IV;IV;IV;IV;IV;IV;IV	NO;NO;NO;NO;NO;NO;NO	Chemotherapy;Chemotherapy;Chemotherapy;Chemotherapy;Chemotherapy;Chemotherapy;Chemotherapy	Not Available;Not Available;Not Available;Not Available;Not Available;Not Available;Not Available	Not Available;1925;350;4325;Not Available;822;Not Available	Not Available;mg;mg;mg;Not Available;mg;Not Available	Not Available;Not Available;Not Available;Not Available;Not Available;Not Available;Not Available	2009;2009;2009;2009;2009;2009;2009	0	Not Available	TCGA-24-1552-F26148	9ea4de18-69c5-4737-b8ec-956d3c28d2c2
TCGA-30-1887	FEMALE	738	Serous Cystadenocarcinoma	Ovary	Dead	Stage IIIC	G2	0	738			WITH TUMOR		67	Bilateral	TCGA-30-1887	f7e01929-733b-420a-ab2b-051dd4a992e5	2	-24495	738	0	738	TCGA-30-1887-D27634;TCGA-30-1887-D27635;TCGA-30-1887-D27638;TCGA-30-1887-D27637;TCGA-30-1887-D27636	e96002ef-d950-4ede-b623-c6ca3cdff2f2;18d7a1d8-66b8-4c1c-ad1c-13862bf6263b;f0f317a4-a2de-4a8f-8fff-54f488ba5642;867b6ed3-96ff-40dc-a6e7-722a047a5b95;d1a4e7ac-6745-47f8-8a98-0b3be8413eca	Not Available;Not Available;Not Available;Not Available;Not Available	21;21;21;21;21	433;134;671;482;134	328;27;503;454;27	Gemcitabine;Taxol;Taxol;Topotecan;Carboplatin	Not Available;Not Available;Not Available;Not Available;Not Available	12;12;12;12;12	Not Available;06;Not Available;03;06	Not Available;Not Available;Not Available;Not Available;Not Available	mg/m2;mg/m2;mg/m2;mg/m2;AUC	PROGRESSION;ADJUVANT;PROGRESSION;PROGRESSION;ADJUVANT	Not Applicable;Not Applicable;Not Applicable;Not Applicable;Not Applicable	Not Available;Not Available;Not Available;Not Available;Not Available	IV;IV;IV;IV;IV	NO;NO;NO;NO;NO	Chemotherapy;Chemotherapy;Chemotherapy;Chemotherapy;Chemotherapy	Not Available;Not Available;Not Available;Not Available;Not Available	800;175;64;3;5	mg/m2;mg/m2;mg/m2;mg/m2;AUC	Not Available;Not Available;Not Available;Not Available;Not Available	2009;2009;2009;2009;2009	Not Available	NOT HISPANIC OR LATINO	TCGA-30-1887-F27633	74d29a4a-9838-4af5-9038-55466876772b
TCGA-13-0893	FEMALE	1319	Serous Cystadenocarcinoma	Ovary	Dead	Stage IIIC	G3	1	461		Recurrence	WITH TUMOR		48	Bilateral	TCGA-13-0893	15170c7f-5880-4fb6-82ce-68d3df0dfb68	20	-17573	1319	0	1319	TCGA-13-0893-D24692;TCGA-13-0893-D24691;TCGA-13-0893-D24693	a48fb2d1-82b6-4f3b-b211-2319a0b329a7;79d5303d-f605-4215-ae23-86f9e3f1e193;5bdb21b9-a7f1-41eb-9eb0-ac3208afa81b	Not Available;Not Available;Not Available	30;30;30	284;284;566	80;80;340	Paciltaxel;Carboplatin;Femara	Not Available;Not Available;Not Available	6;6;6	8;8;Not Available	Not Available;Not Available;Not Available	mg/m2;Not Available;mg/m2	ADJUVANT;ADJUVANT;ADJUVANT	Not Applicable;Not Applicable;Not Applicable	Not Available;Not Available;Not Available	IV;IV;Not Available	NO;NO;NO	Chemotherapy;Chemotherapy;Hormone Therapy	Not Available;Not Available;Not Available	175;5;2.5	mg/m2;Not Available;mg/m2	Not Available;Not Available;Not Available	2009;2009;2009	Not Available	NOT HISPANIC OR LATINO	TCGA-13-0893-F24690	2e198688-0234-4ff0-bae5-0472ce5af182
TCGA-13-0884	FEMALE	3260	Serous Cystadenocarcinoma	Ovary	Dead	Stage IIIC	G3	1	1251		Recurrence	WITH TUMOR		39	Bilateral	TCGA-13-0884	63a75e0b-9241-4f0e-9236-01a2e2c05b7e	20	-14538	3260	0	3260	TCGA-13-0884-D24653;TCGA-13-0884-D24654;TCGA-13-0884-D24656;TCGA-13-0884-D24652;TCGA-13-0884-D24655	7cffdd63-0cfb-4c4c-98e9-ac1d35615574;3eeaa9ad-d6c1-4843-8a53-d76c3243380c;f696b7ed-1114-49b6-a2a4-8d394fdcfa43;fc570206-ca8e-42f3-a1f2-a46aea37a65e;29c3e4e5-9940-499e-94ec-de4979d77ff0	Not Available;Not Available;Not Available;Not Available;Not Available	30;30;30;30;30	191;191;307;191;307	55;55;240;55;240	Paciltaxel;Gemicitabine;Cisplatin;Carboplatin;Paciltaxel	Not Available;Not Available;Not Available;Not Available;Not Available	6;6;6;6;6	6;6;4;6;4	Not Available;Not Available;Not Available;Not Available;Not Available	mg/m2;mg/m2;mg/m2;Not Available;mg/m2	ADJUVANT;ADJUVANT;ADJUVANT;ADJUVANT;ADJUVANT	Not Applicable;Not Applicable;Not Applicable;Not Applicable;Not Applicable	Not Available;Not Available;Not Available;Not Available;Not Available	IV;IV;IP;IV;IV;IP;IV	NO;NO;NO;NO;NO	Chemotherapy;Chemotherapy;Chemotherapy;Chemotherapy;Chemotherapy	Not Available;Not Available;Not Available;Not Available;Not Available	60;800;74;5;133	mg/m2;mg/m2;mg/m2;Not Available;mg/m2	Not Available;Not Available;Not Available;Not Available;Not Available	2009;2009;2009;2009;2009	Not Available	NOT HISPANIC OR LATINO	TCGA-13-0884-F24651	e819d979-7efe-4737-b8b4-0a64e5588d4b
TCGA-04-1356	FEMALE	1499	Serous Cystadenocarcinoma	Ovary	Dead	Stage IIC	G3	1	156		Recurrence	WITH TUMOR		62	Bilateral	TCGA-04-1356	8652ddee-98f4-4584-b450-e6f2f5c9d7ec	26	-22855	1499	0	Not Available	TCGA-04-1356-D24006;TCGA-04-1356-D24007	dcc12929-7c55-426b-83cd-0f693a953cfb;6d03f8af-3a97-4801-bded-4dd5c67c3e8d	Not Available;Not Available	10;10	312;312	161;161	Taxol;Carboplatin	Not Available;Not Available	11;11	06;06	Not Available;Not Available	mg;mg	RECURRENCE;RECURRENCE	Not Applicable;Not Applicable	Not Available;Not Available	IV;IV	NO;NO	Chemotherapy;Chemotherapy	Not Available;Not Available	1824.5;4531.3	mg;mg	Not Available;Not Available	2009;2009	Not Available	HISPANIC OR LATINO	TCGA-04-1356-F24005	5860debc-e1f5-4cbf-a327-55eaada5452e
TCGA-24-1927	FEMALE	500	Serous Cystadenocarcinoma	Ovary	Dead	Stage IIIC	G3	1	290		Recurrence	WITH TUMOR		59	Bilateral	TCGA-24-1927	8c47ae58-91c7-4247-b420-50f31f5eb00d	1	-21719	500	0	500	TCGA-24-1927-D26399;TCGA-24-1927-D26397;TCGA-24-1927-D26400;TCGA-24-1927-D26398;TCGA-24-1927-D26401	a191ec4f-2b7b-4766-8c5b-1bad03dbc5d3;86eca33e-cb34-4166-9875-5c1d0a83466b;2ecf64b7-e849-4d43-bf62-b9e2074a9a34;d7b1885b-3bef-4eb1-996e-229cbcd78c8d;ad8c1787-5794-4bc3-95ed-0ed4f4b84efa	Not Available;Not Available;Not Available;Not Available;Not Available	1;1;1;1;1	328;132;435;132;132	293;15;372;15;15	Gaminocamptothecin;Taxol;Aminopterin;Carboplatin;SCH 58500	Not Available;Not Available;Not Available;Not Available;Not Available	3;3;3;3;3	02;06;02;06;Not Available	Not Available;Not Available;Not Available;Not Available;Not Available	mg;mg;mg;mg;mg	RECURRENCE;ADJUVANT;PROGRESSION;ADJUVANT;PROGRESSION	Not Applicable;Not Applicable;Not Applicable;Not Applicable;Not Applicable	Not Available;Not Available;Not Available;Not Available;Not Available	IV;IV;IV;IV;Not Available	NO;NO;NO;NO;NO	Chemotherapy;Chemotherapy;Chemotherapy;Chemotherapy;Targeted Molecular therapy	Not Available;Not Available;Not Available;Not Available;Not Available	3750;1587;8100;3947;4200	mg;mg;mg;mg;mg	Not Available;Not Available;Not Available;Not Available;Not Available	2010;2010;2010;2010;2010	Not Available	Not Available	TCGA-24-1927-F26396	961f5963-db18-487d-b99d-18ca0a9c78f9
TCGA-09-0366	FEMALE	1757	Serous Cystadenocarcinoma	Ovary	Dead	Stage IIIC	G3	1	190		Recurrence	WITH TUMOR		55	Bilateral	TCGA-09-0366	23771dab-2aab-4d2b-95e2-9af7092cee6b	4	-20440	1757	0	Not Available	TCGA-09-0366-D24209;TCGA-09-0366-D24208;TCGA-09-0366-D24210	ac21dd09-cdc4-45dd-bf7e-3ae965e1d90b;6c5228bf-8c8a-4919-8775-626e30a7370e;b0230f3d-a6f8-4e55-a04e-d6d0d37c99e4	Not Available;Not Available;Not Available	27;27;27	113;113;288	5;5;225	taxol;Carbo;topotecan	Not Available;Not Available;Not Available	3;3;3	6;6;4	Not Available;Not Available;Not Available	mg/m2;Not Available;mg/m2	ADJUVANT;ADJUVANT;RECURRENCE	Not Applicable;Not Applicable;Not Applicable	Not Available;Not Available;Not Available	IV;IV;IV	NO;NO;NO	Chemotherapy;Chemotherapy;Chemotherapy	Not Available;Not Available;Not Available	135;Not Available;1.5	mg/m2;Not Available;mg/m2	Not Available;Not Available;Not Available	2009;2009;2009	Not Available	Not Available	TCGA-09-0366-F24207	06ba5b59-0675-4fde-a4aa-237171de4442
TCGA-04-1367	FEMALE	3145	Serous Cystadenocarcinoma	Ovary	Alive	Stage IIIC	G3	1	2997		Progression of Disease	TUMOR FREE		50	Bilateral	TCGA-04-1367	30b8f4cd-9245-4496-a8a8-c3e59093bc0a	2	-18577	Not Applicable	0	2174	TCGA-04-1367-D24054;TCGA-04-1367-D24053	b8e70426-e545-4d98-8d53-6a6b8c355636;d22430b7-f915-4dfb-928c-96aea53a860c	Not Available;Not Available	9;9	199;199	24;24	Carboplatin;Taxol	Not Available;Not Available	11;11	07;07	Not Available;Not Available	mg;mg	ADJUVANT;ADJUVANT	Not Applicable;Not Applicable	Not Available;Not Available	IV;IV	NO;NO	Chemotherapy;Chemotherapy	Not Available;Not Available	721;1925	mg;mg	Not Available;Not Available	2009;2009	0	NOT HISPANIC OR LATINO	TCGA-04-1367-F24052;TCGA-04-1367-F62486	88ca4e8a-5a13-4da2-909f-cffd1961f4ed;870E6179-46DB-40A7-8130-1AA517FD6454
TCGA-20-0991	FEMALE	797	Serous Cystadenocarcinoma	Ovary	Alive	Stage IIB	G3	0	797			TUMOR FREE		78	Right	TCGA-20-0991	36595b52-2b5f-4e87-80eb-37c29109e92a	23	-28694	Not Applicable	0	797	TCGA-20-0991-D25531	8a48bcf0-7943-48da-89c6-1831cbe9da03	Not Available	16	Not Available	71	Carboplatin	Not Available	3	3	Not Available	mg/m2	ADJUVANT	Not Applicable	Not Available	IV	Not Available	Chemotherapy	Not Available	425	mg/m2	Not Available	2009	0	NOT HISPANIC OR LATINO	TCGA-20-0991-F25530	974f709b-2b9a-4a59-86a5-15974cdd107b
TCGA-24-1430	FEMALE	863	Serous Cystadenocarcinoma	Ovary	Dead	Stage IIIC	G3	1	449		Recurrence	WITH TUMOR		68	Bilateral	TCGA-24-1430	3018efe7-13a1-47ae-a726-8fc967c73841	12	-24939	863	0	863	TCGA-24-1430-D25974;TCGA-24-1430-D25968;TCGA-24-1430-D25971;TCGA-24-1430-D25973;TCGA-24-1430-D25970;TCGA-24-1430-D25969;TCGA-24-1430-D25972;TCGA-24-1430-D25975;TCGA-24-1430-D25967	a3db39b6-eb97-47a8-8e64-cb0d8de8ffab;4630dd23-dba3-4101-8d84-62b9fd51dfa3;bafc8e9f-3310-409a-9129-50f29f23b38d;26fd89d8-c384-4c27-8f76-e8fa42667511;cbaf76a6-ae77-42d5-8ff7-fdc31b7a31bb;ada775a9-b4ec-43c5-bf11-7533cd8667cd;3194f6fd-af01-4f55-ba85-50eb0bd7af8e;2a8e83d3-0e03-4a92-ac3d-9db1c4104de4;574ea0f6-0c98-43ed-a8c7-3bf90f81ae70	Not Available;Not Available;Not Available;Not Available;Not Available;Not Available;Not Available;Not Available;Not Available	12;12;12;12;12;12;12;12;12	841;106;624;769;547;106;769;841;106	804;22;568;652;463;22;652;804;22	Doxil;Taxol;Doxil;Carboplatin;Topotecan;Amitostine;Taxol;Gomzar;Cisplatin	Not Available;Not Available;Not Available;Not Available;Not Available;Not Available;Not Available;Not Available;Not Available	5;5;5;5;5;5;5;5;5	1.5;06;03;05;05;06;05;1.5;06	Not Available;Not Available;Not Available;Not Available;Not Available;Not Available;Not Available;Not Available;Not Available	mg;mg;mg;mg;mg;mg;mg;mg;mg	PROGRESSION;ADJUVANT;PROGRESSION;PROGRESSION;RECURRENCE;ADJUVANT;PROGRESSION;PROGRESSION;ADJUVANT	Not Applicable;Not Applicable;Not Applicable;Not Applicable;Not Applicable;Not Applicable;Not Applicable;Not Applicable;Not Applicable	Not Available;Not Available;Not Available;Not Available;Not Available;Not Available;Not Available;Not Available;Not Available	IV;IV;IV;IV;IV;IV;IV;IV;IV	NO;NO;NO;NO;NO;NO;NO;NO;NO	Chemotherapy;Chemotherapy;Chemotherapy;Chemotherapy;Chemotherapy;Chemotherapy;Chemotherapy;Chemotherapy;Chemotherapy	Not Available;Not Available;Not Available;Not Available;Not Available;Not Available;Not Available;Not Available;Not Available	81;1252;177;1960;44.88;5301;128;5150;539	mg;mg;mg;mg;mg;mg;mg;mg;mg	Not Available;Not Available;Not Available;Not Available;Not Available;Not Available;Not Available;Not Available;Not Available	2009;2009;2009;2009;2009;2009;2009;2009;2009	1	Not Available	TCGA-24-1430-F25966	a1fbfc62-641e-41cd-bebb-0044b8433a52
TCGA-13-0761	FEMALE	1156	Serous Cystadenocarcinoma	Ovary	Dead	Stage IV	G3	1	424		Recurrence	WITH TUMOR		51	Bilateral	TCGA-13-0761	00630714-7ab3-44e1-afff-186300edae44	24	-18697	Not Applicable	0	1036	TCGA-13-0761-D24547;TCGA-13-0761-D24546	bcdda631-62b9-4f30-a4ed-6edd08a6dcd2;f9983963-5c1a-496b-8282-939554cd4f52	Not Available;Not Available	17;17	221;221	53;53	Docetaxel;Carboplatin	Not Available;Not Available	4;4	8;8	Not Available;Not Available	mg/m2;Not Available	ADJUVANT;ADJUVANT	Not Applicable;Not Applicable	Not Available;Not Available	IV;IV	NO;NO	Chemotherapy;Chemotherapy	Not Available;Not Available	75;5	mg/m2;Not Available	Not Available;Not Available	2009;2009	Not Available	NOT HISPANIC OR LATINO	TCGA-13-0761-F24545;TCGA-13-0761-F72596	0304c298-144b-43f2-997d-be1fb1d59cab;4EF3D622-B98D-4A9E-B234-3587998C4330
TCGA-13-2066	FEMALE	2133	Serous Cystadenocarcinoma	Ovary	Dead	Stage IV	G3	1	1028			TUMOR FREE		49	Bilateral	TCGA-13-2066	bcb87812-94e3-4dc0-867e-d049b44a2690	1	-18170	Not Applicable	0	295	TCGA-13-2066-D25019;TCGA-13-2066-D25020	1fd48297-038d-468d-a6e2-b749ef1fa449;81c7a339-e58c-460a-82de-70cc361da73e	Not Available;Not Available	1;1	169;169	61;61	Carboplatin;Paclitaxel	Not Available;Not Available	2;2	6;6	Not Available;Not Available	AUC;mg/m2	ADJUVANT;ADJUVANT	Not Applicable;Not Applicable	Not Available;Not Available	IV;IV	NO;NO	Chemotherapy;Chemotherapy	Not Available;Not Available	6;Not Available	AUC;mg/m2	Not Available;Not Available	2010;2010	Not Available	HISPANIC OR LATINO	TCGA-13-2066-F25018;TCGA-13-2066-F72687	da230e2d-a08b-4cf3-8411-47128770411c;CC936079-881B-4171-9229-AE0FB1D1AAAF
TCGA-61-2098	FEMALE	1993	Serous Cystadenocarcinoma	Ovary	Alive	Stage IIIC	G2	0	1993			TUMOR FREE		62	Bilateral	TCGA-61-2098	eb7c3b35-7a5e-4621-b31f-9775c51f9a23	8	-22876	Not Applicable	0	1993	TCGA-61-2098-D28419;TCGA-61-2098-D28420	e844b70b-eaae-45a1-98eb-911c6c63e56c;e06ba706-69b6-4c0a-a1d8-73d71b53a692	Not Available;Not Available	8;8	145;145	14;14	Taxol;Carboplatin	Not Available;Not Available	12;12	06;05	Not Available;Not Available	Not Available;Not Available	ADJUVANT;ADJUVANT	Not Applicable;Not Applicable	Not Available;Not Available	IV;IV	NO;NO	Chemotherapy;Chemotherapy	Not Available;Not Available	Not Available;Not Available	Not Available;Not Available	Not Available;Not Available	2009;2009	Not Available	Not Available	TCGA-61-2098-F28418	0ed0fcad-6f61-425a-9057-ea887d6128ce
TCGA-25-2409	FEMALE	821	Serous Cystadenocarcinoma	Ovary	Dead	Stage IV	G3	1	304		Recurrence	WITH TUMOR		71	Bilateral	TCGA-25-2409	dce71741-ccbe-40b7-a0b8-2048d07187a4	5	-26267	821	0	821	TCGA-25-2409-D26842;TCGA-25-2409-D26844;TCGA-25-2409-D26843	6e085dc2-54ad-4fd4-b583-556c47e0fceb;e4044ad0-3ce1-44b3-9b0a-9b22bab4fe96;f9e622c7-2103-4813-979c-461082e72b52	Not Available;Not Available;Not Available	5;5;5	182;Not Available;182	31;Not Available;31	Carboplatin;Tamoxifen;Taxotere	Not Available;Not Available;Not Available	1;1;1	6;Not Available;6	Not Available;Not Available;Not Available	Not Available;Not Available;Not Available	ADJUVANT;RECURRENCE;ADJUVANT	Not Applicable;Not Applicable;Not Applicable	Not Available;Not Available;Not Available	IV;Not Available;IV	NO;NO;NO	Chemotherapy;Hormone Therapy;Chemotherapy	Not Available;Not Available;Not Available	Not Available;Not Available;Not Available	Not Available;Not Available;Not Available	Not Available;Not Available;Not Available	2010;2010;2010	Not Available	NOT HISPANIC OR LATINO	TCGA-25-2409-F26841	c42fe3b3-07fd-4f77-9037-972142140153
TCGA-24-2281	FEMALE	1357	Serous Cystadenocarcinoma	Ovary	Alive	Stage IIA	G3	0	1357			TUMOR FREE		68	Bilateral	TCGA-24-2281	59b3fbfe-0b7c-41e5-b756-ee7e23730df5	5	-25019	Not Applicable	0	1357	TCGA-24-2281-D26571;TCGA-24-2281-D26572	c3bc6bfa-aeaf-48c8-9afb-72f424b38730;15f30f01-7272-4617-84a1-8e94f86f6372	Not Available;Not Available	5;5	Not Available;Not Available	Not Available;Not Available	Carboplatin;Taxol	Not Available;Not Available	4;4	06;06	Not Available;Not Available	Not Available;Not Available	ADJUVANT;ADJUVANT	Not Applicable;Not Applicable	Not Available;Not Available	IV;IV	Not Available;NO	Chemotherapy;Chemotherapy	Not Available;Not Available	Not Available;Not Available	Not Available;Not Available	Not Available;Not Available	2010;2010	0	Not Available	TCGA-24-2281-F26570	5af8f13c-15ce-4bde-be6f-7adc93a93883
TCGA-24-2289	FEMALE	2049	Serous Cystadenocarcinoma	Ovary	Dead	Stage IV	G3	1	568		Recurrence	WITH TUMOR		68	Bilateral	TCGA-24-2289	b867e933-e3e3-4491-9bb6-b18c48d6f173	16	-25191	2049	0	2049	TCGA-24-2289-D26579;TCGA-24-2289-D26580;TCGA-24-2289-D26581	e30043ad-c281-46eb-9aa1-a49e87ab0647;586feb5d-42b7-4242-945c-dfdd16f8647e;09917dd3-3ce9-4899-8d93-69466b71bdb0	Not Available;Not Available;Not Available	16;16;16	183;183;708	4;4;598	Taxol;Cisplatin;Taxotere	Not Available;Not Available;Not Available	3;3;3	08;08;06	Not Available;Not Available;Not Available	mg;mg;mg	ADJUVANT;ADJUVANT;RECURRENCE	Not Applicable;Not Applicable;Not Applicable	Not Available;Not Available;Not Available	IV;IV;IV	NO;NO;NO	Chemotherapy;Chemotherapy;Chemotherapy	Not Available;Not Available;Not Available	1735;645;957	mg;mg;mg	Not Available;Not Available;Not Available	2010;2010;2010	Not Available	Not Available	TCGA-24-2289-F26578	1f1d7a75-371a-409e-abba-e228ad2397fc
TCGA-13-1408	FEMALE	1680	Serous Cystadenocarcinoma	Ovary	Dead	Stage IIIC	G3	1	765			WITH TUMOR		59	Not Available	TCGA-13-1408	8fac8e40-beac-4059-9d54-7ee530598cfd	20	-21635	Not Applicable	0	180	TCGA-13-1408-D24813;TCGA-13-1408-D24812;TCGA-13-1408-D24816;TCGA-13-1408-D24815;TCGA-13-1408-D24814	0bc7de2d-ef5a-46ab-b7cb-174b698af786;11c746b9-b132-422a-b4c5-f6389fe6c53b;91bf1c84-4812-4b16-a1f7-c1cf1042de3e;e315b96b-2868-4ae0-9096-6c62a57da9f1;4503cd88-2a47-4ced-af56-16b2b3a96bd3	Not Available;Not Available;Not Available;Not Available;Not Available	30;30;1;1;1	91;91;201;201;201	8;8;152;152;152	Paclitaxel;Carboplatin;Paclitaxel;Paclitaxel;Cisplatin	Not Available;Not Available;Not Available;Not Available;Not Available	6;6;2;2;2	5;5;3;3;3	Not Available;Not Available;60;135;75	mg/m2;AUC;mg/m2;mg/m2;mg/m2	ADJUVANT;ADJUVANT;ADJUVANT;ADJUVANT;ADJUVANT	Not Applicable;Not Applicable;Not Applicable;Not Applicable;Not Applicable	Not Available;Not Available;Not Available;Not Available;Not Available	IV;IV;IP;IV;IP	NO;NO;NO;NO;NO	Chemotherapy;Chemotherapy;Chemotherapy;Chemotherapy;Chemotherapy	Not Available;Not Available;Not Available;Not Available;Not Available	175;5;Not Available;Not Available;Not Available	mg/m2;AUC;mg/m2;mg/m2;mg/m2	Not Available;Not Available;Not Available;Not Available;Not Available	2009;2009;2010;2010;2010	Not Available	NOT HISPANIC OR LATINO	TCGA-13-1408-F24811;TCGA-13-1408-F72659	b5ebd8fe-77ce-48fc-b3de-f0ac628225e4;CBED0324-EF5A-4B27-AAAB-952D4B886443
TCGA-61-1995	FEMALE	61	Serous Cystadenocarcinoma	Ovary	Alive	Stage IIIC	G3	0	61			WITH TUMOR		43	Bilateral	TCGA-61-1995	931738a7-4b5b-46dc-b69f-72600862d8af	8	-16016	Not Applicable	0	61	TCGA-61-1995-D28304;TCGA-61-1995-D28303	5b457183-3195-43d4-8c3e-f244c641648d;154a83f9-1655-45ff-9961-44cd5d6992a7	Not Available;Not Available	8;8	132;132	67;67	Taxol;Cisplatin	Not Available;Not Available	12;12	04;04	Not Available;Not Available	mg;mg	ADJUVANT;ADJUVANT	Not Applicable;Not Applicable	Not Available;Not Available	IP;IV;IP;IV	NO;NO	Chemotherapy;Chemotherapy	Not Available;Not Available	1311;3202	mg;mg	Not Available;Not Available	2009;2009	Not Available	NOT HISPANIC OR LATINO	TCGA-61-1995-F28302	23cec1cb-18f5-4261-bb98-4a4260f7306c
TCGA-61-1736	FEMALE	1484	Serous Cystadenocarcinoma	Ovary	Dead	Stage IIIC	G3	1	764		Recurrence	WITH TUMOR		45	Bilateral	TCGA-61-1736	0a2d29de-869a-4dc8-ad11-6ee0d0a3a895	2	-16613	1484	0	1484	TCGA-61-1736-D28178;TCGA-61-1736-D28177;TCGA-61-1736-D28180;TCGA-61-1736-D28176;TCGA-61-1736-D28179	57649c27-8fde-4924-bb6a-36f78d3d965e;0dd45cff-9b04-43bc-862b-62ac6b70880a;6b95b794-0927-46c0-8786-6e66ec7050fc;f0714214-07d4-4c41-9e61-b6470308eea9;4be9230a-4d81-4cd4-a1ba-3f24ad91f5cc	Not Available;Not Available;Not Available;Not Available;Not Available	8;8;8;8;8	138;138;Not Available;Not Available;Not Available	34;34;946;Not Available;Not Available	Carboplatin;Taxol;Doxil;Gemzar;Cisplatin	Not Available;Not Available;Not Available;Not Available;Not Available	12;12;12;12;12	06;06;Not Available;Not Available;Not Available	Not Available;Not Available;Not Available;Not Available;Not Available	Not Available;Not Available;Not Available;Not Available;Not Available	ADJUVANT;ADJUVANT;PROGRESSION;RECURRENCE;RECURRENCE	Not Applicable;Not Applicable;Not Applicable;Not Applicable;Not Applicable	Not Available;Not Available;Not Available;Not Available;Not Available	IV;IV;Not Available;Not Available;Not Available	NO;NO;NO;Not Available;NO	Chemotherapy;Chemotherapy;Chemotherapy;Chemotherapy;Chemotherapy	Not Available;Not Available;Not Available;Not Available;Not Available	Not Available;Not Available;Not Available;Not Available;Not Available	Not Available;Not Available;Not Available;Not Available;Not Available	Not Available;Not Available;Not Available;Not Available;Not Available	2009;2009;2009;2009;2009	Not Available	NOT HISPANIC OR LATINO	TCGA-61-1736-F28175	dbee91e2-9410-4570-9c69-8e43beb8887d
TCGA-61-1721	FEMALE	338	Serous Cystadenocarcinoma	Ovary	Alive	Stage IV	G1	0	338			TUMOR FREE		38	Bilateral	TCGA-61-1721	1c0318d9-0472-4840-add4-46bb9f914a30	2	-13894	Not Applicable	0	338	TCGA-61-1721-D28124;TCGA-61-1721-D28127;TCGA-61-1721-D28126;TCGA-61-1721-D28125	0b65dd59-5982-4c6e-bd9a-705298dcb9bd;d4666102-4b7e-48ee-80ae-e210b59c5590;88f75546-60dd-4748-83ef-3e287dfec167;be53f54f-26ff-45ce-8475-53ab28702ead	Not Available;Not Available;Not Available;Not Available	1;1;1;1	317;317;338;338	193;193;2;2	Oxaliplatin;Taxotere;Carboplatin;Taxol	Not Available;Not Available;Not Available;Not Available	12;12;12;12	06;06;06;06	Not Available;Not Available;Not Available;Not Available	mg;mg;mg;mg	ADJUVANT;ADJUVANT;OTHER, SPECIFY IN NOTES;OTHER, SPECIFY IN NOTES	Not Applicable;Not Applicable;Neoadjuvant;Neoadjuvant	Not Available;Not Available;Not Available;Not Available	IP;IV;IP;IV;IV;IV	NO;NO;NO;NO	Chemotherapy;Chemotherapy;Chemotherapy;Chemotherapy	Not Available;Not Available;Not Available;Not Available	528;786;3960;1782	mg;mg;mg;mg	Not Available;Not Available;Not Available;Not Available	2009;2009;2009;2009	Not Available	NOT HISPANIC OR LATINO	TCGA-61-1721-F28123	902be45d-0481-4e42-8dc7-10a185ca8ade
TCGA-29-1776	FEMALE	360	Serous Cystadenocarcinoma	Ovary	Alive	Stage IIIC	G3	0	360			WITH TUMOR		63	Bilateral	TCGA-29-1776	7472b3ba-9b15-4d97-8708-a2dd82ca0f45	2	-23016	Not Applicable	0	360	TCGA-29-1776-D27410;TCGA-29-1776-D27413;TCGA-29-1776-D27412;TCGA-29-1776-D27411	dc28acfe-77b0-4f61-b4d1-2cefb76d2598;ab1add4a-31c8-482e-a205-0e9c8a61be8b;a9e8a531-b7c7-4ded-a8d8-72c12e8cf1b2;383ee8a0-b591-49b5-91f3-fe0b14dbf094	Not Available;Not Available;Not Available;Not Available	7;7;7;7	154;592;592;154	32;522;522;32	Carboplatin;Bevacizumab;Docetaxel;Paclitaxel	Not Available;Not Available;Not Available;Not Available	4;4;4;4	06;Not Available;03;06	Not Available;Not Available;Not Available;Not Available	AUC;mg;mg;mg/m2	ADJUVANT;PROGRESSION;PROGRESSION;ADJUVANT	Not Applicable;Not Applicable;Not Applicable;Not Applicable	Not Available;Not Available;Not Available;Not Available	IV;Not Available;IV;IV	NO;YES;YES;NO	Chemotherapy;Targeted Molecular therapy;Chemotherapy;Chemotherapy	Not Available;Not Available;Not Available;Not Available	6;2184;88;175	AUC;mg;mg;mg/m2	Not Available;Not Available;Not Available;Not Available	2010;2010;2010;2010	0	Not Available	TCGA-29-1776-F27409	fd4ab0eb-64c8-4130-b885-6ce0dabfa184
TCGA-31-1956	FEMALE	1342	Serous Cystadenocarcinoma	Ovary	Alive	Stage IIIB	G3	1			Locoregional Disease	WITH TUMOR		60	Left	TCGA-31-1956	e1158102-06f2-47bb-9fe0-49b57f070755	19	-22100	Not Applicable	0	1342	TCGA-31-1956-D27712;TCGA-31-1956-D27713	d3e74b41-1369-48f8-a1ad-767692bd830f;5cc90a67-38af-4ca7-a5cf-9c7676f0cb0b	Not Available;Not Available	19;19	188;188	34;34	Carboplatin;Paclitaxel	Not Available;Not Available	10;10	07;07	Not Available;Not Available	mg;mg	ADJUVANT;ADJUVANT	Not Applicable;Not Applicable	Not Available;Not Available	IV;IV	NO;NO	Chemotherapy;Chemotherapy	Not Available;Not Available	5150;1590	mg;mg	Not Available;Not Available	2009;2009	Not Available	NOT HISPANIC OR LATINO	TCGA-31-1956-F27711	97da6eb3-ae55-4f66-af96-3a0332182595
TCGA-25-2399	FEMALE	608	Serous Cystadenocarcinoma	Ovary	Dead	Stage IIIC	G3	1	243		Recurrence	WITH TUMOR		80	Bilateral	TCGA-25-2399	ad2b1a0a-153f-483d-b228-5763eba3f6cc	5	-29373	608	0	608	TCGA-25-2399-D26820;TCGA-25-2399-D26819;TCGA-25-2399-D26821	2bdcf36c-2cf7-4179-8ba3-4fef5c34ce65;f67bbe0c-7be0-4fd0-9911-bdf622d7f6d3;9ca6cc56-eeb0-4463-8fad-adb07d1f9dae	Not Available;Not Available;Not Available	5;5;5	182;182;Discrepancy	61;61;Discrepancy	Taxol;Carboplatin;Doxil	Not Available;Not Available;Not Available	1;1;1	04;04;03	Not Available;Not Available;Not Available	Not Available;Not Available;Not Available	ADJUVANT;ADJUVANT;PROGRESSION	Not Applicable;Not Applicable;Not Applicable	Not Available;Not Available;Not Available	IV;IV;IV	NO;NO;NO	Chemotherapy;Chemotherapy;Chemotherapy	Not Available;Not Available;Not Available	Not Available;Not Available;Not Available	Not Available;Not Available;Not Available	Not Available;Not Available;Not Available	2010;2010;2010	Not Available	NOT HISPANIC OR LATINO	TCGA-25-2399-F26818	f2ca0f5d-438c-46cf-af2a-976cf4036f11
TCGA-13-0724	FEMALE	83	Serous Cystadenocarcinoma	Ovary	Dead	Stage IV	G3	1	83		Progression of Disease	WITH TUMOR		72	Right	TCGA-13-0724	a9abe7a7-4126-414b-87d2-a6d25abcf1fa	24	-26342	83	0	83	TCGA-13-0724-D24508	821d3091-cd9c-4958-a260-e9ea9cc10b72	Not Available	16	75	75	Carboplatin	Not Available	4	1	Not Available	Not Available	ADJUVANT	Not Applicable	Not Available	IV	Not Available	Chemotherapy	Not Available	Not Available	Not Available	Not Available	2009	Not Available	HISPANIC OR LATINO	TCGA-13-0724-F24507	f97cc3a0-d1f0-4e85-bcb8-52e1d2d9cd79
TCGA-09-1664	FEMALE	2279	Serous Cystadenocarcinoma	Ovary	Dead	Stage IIIC	G1	0	2279			Not Available		37	Bilateral	TCGA-09-1664	3438c018-9856-4628-ae59-7d365713647f	2	-13739	2279	0	Not Available	TCGA-09-1664-D24269;TCGA-09-1664-D24270	c82effc8-6fc1-410b-8c82-5aeaf9c1a564;5c586019-e92b-4f51-ad6c-5eb9366488d5	Not Available;Not Available	4;4	139;139	15;15	Taxotere;Carboplatin	Not Available;Not Available	9;9	6;6	Not Available;Not Available	Not Available;Not Available	ADJUVANT;ADJUVANT	Not Applicable;Not Applicable	Not Available;Not Available	IV;IV	NO;NO	Chemotherapy;Chemotherapy	Not Available;Not Available	70;6	Not Available;Not Available	Not Available;Not Available	2009;2009	Not Available	NOT HISPANIC OR LATINO	TCGA-09-1664-F24268	c96ac4bb-27ed-4e18-8939-9b1cfc8ead4d
TCGA-57-1585	FEMALE	53	Serous Cystadenocarcinoma	Ovary	Dead	Stage IIIC	G3	0	53			WITH TUMOR		57	Bilateral	TCGA-57-1585	5ed14506-f69a-4da8-9965-72d3270b9f72	2	-20862	53	0	53	TCGA-57-1585-D28078;TCGA-57-1585-D28077	e291cd52-9ae7-45f5-a0bd-fc522f30f01b;81bf2efd-8318-47a1-9950-fbc7a075cf68	Not Available;Not Available	28;28	53;53	18;18	Taxol;Carboplatin	Not Available;Not Available	7;7	Not Available;Not Available	Not Available;Not Available	Not Available;Not Available	ADJUVANT;ADJUVANT	Not Applicable;Not Applicable	Not Available;Not Available	Not Available;Not Available	NO;NO	Chemotherapy;Chemotherapy	Not Available;Not Available	Not Available;Not Available	Not Available;Not Available	Not Available;Not Available	2009;2009	Not Available	NOT HISPANIC OR LATINO	TCGA-57-1585-F28076	80632215-5601-43af-ad21-18fba962496e
TCGA-13-0905	FEMALE	3746	Serous Cystadenocarcinoma	Ovary	Alive	Stage IIIC	G3	1	1535			TUMOR FREE		51	Left	TCGA-13-0905	2038fd65-d8f1-4b16-af90-b1c8f9a379a7	20	-18757	Not Applicable	0	1455	TCGA-13-0905-D24732;TCGA-13-0905-D24731;TCGA-13-0905-D24730	00d12b24-ecbd-4ee0-b3c9-86d1f2051ea3;d16052dd-7975-441f-919e-4fcf9463a163;feedb04f-785c-4c0c-a091-d00618dea595	Not Available;Not Available;Not Available	30;30;30	223;125;125	153;20;20	Cisplatin;Paciltaxel;Carboplatin	Not Available;Not Available;Not Available	6;6;6	4;6;6	Not Available;Not Available;Not Available	mg/m2;mg/m2;Not Available	ADJUVANT;ADJUVANT;ADJUVANT	Not Applicable;Not Applicable;Not Applicable	Not Available;Not Available;Not Available	IP;IV;IV	NO;NO;NO	Chemotherapy;Chemotherapy;Chemotherapy	Not Available;Not Available;Not Available	500;175;6	mg/m2;mg/m2;Not Available	Not Available;Not Available;Not Available	2009;2009;2009	Not Available	NOT HISPANIC OR LATINO	TCGA-13-0905-F24729;TCGA-13-0905-F72638	bbd54f4d-22ab-4f0a-9678-3e2a9d683ac7;F102AD41-8128-483F-A3C8-F80C8C87D616
TCGA-24-2019	FEMALE	148	Serous Cystadenocarcinoma	Ovary	Alive	Stage IIIC	G3	0	148			Not Available		46	Bilateral	TCGA-24-2019	bbad2efe-e9c7-4f8f-924b-ebbbe4c181d4	16	-17009	Not Applicable	0	148																								1	Not Available	TCGA-24-2019-F26429	478f18ec-c7d2-485e-b83d-1b416c86ac20
TCGA-13-0912	FEMALE	1145	Serous Cystadenocarcinoma	Ovary	Dead	Stage IIIC	G3	1	469		Recurrence	WITH TUMOR		58	Bilateral	TCGA-13-0912	58d34254-4f5b-40a4-9e9f-7160062fb2a4	25	-21427	Not Applicable	0	1036	TCGA-13-0912-D24756;TCGA-13-0912-D24755;TCGA-13-0912-D24754	f039ec8f-f07a-4b69-9b57-674eb3fe8816;60f29631-b790-49a0-92f3-2834f89bfbc7;12cfb557-540b-425c-a068-9897165c526a	Not Available;Not Available;Not Available	15;15;15	147;147;147	35;35;35	Paclitaxel;Paclitaxel;Cisplatin	Not Available;Not Available;Not Available	4;4;4	6;6;6	Not Available;Not Available;Not Available	mg/m2;mg/m2;mg/m2	ADJUVANT;ADJUVANT;ADJUVANT	Not Applicable;Not Applicable;Not Applicable	Not Available;Not Available;Not Available	IP;IV;IV	Not Available;Not Available;Not Available	Chemotherapy;Chemotherapy;Chemotherapy	Not Available;Not Available;Not Available	60;135;75	mg/m2;mg/m2;mg/m2	Not Available;Not Available;Not Available	2009;2009;2009	Not Available	NOT HISPANIC OR LATINO	TCGA-13-0912-F24753;TCGA-13-0912-F72629	8236ba4d-8089-40c1-93ae-156ca8543db8;816DBA8B-D1AD-4222-A4F9-E2D1DA18938B
TCGA-09-1668	FEMALE	1684	Serous Cystadenocarcinoma	Ovary	Alive	Stage IIIC	G3	0	1684			WITH TUMOR		57	Right	TCGA-09-1668	0e475b3d-be3c-431a-ab12-5a867ea8f6cd	2	-20972	Not Applicable	0	1684	TCGA-09-1668-D24303;TCGA-09-1668-D24301;TCGA-09-1668-D24302	fb1e1df5-88fc-4470-8a14-b8e52cb01d91;d03e27fc-0655-4ff0-b02f-aa7941ea73f5;e5afb655-15ff-4e6d-8a65-2427d238370e	Not Available;Not Available;Not Available	6;6;6	135;320;135	31;151;31	Taxotere;Taxotere;Carboplatin	Not Available;Not Available;Not Available	8;8;8	6;9;6	Not Available;Not Available;Not Available	mg;mg/m2;mg	ADJUVANT;OTHER, SPECIFY IN NOTES;ADJUVANT	Not Applicable;Not Available;Not Applicable	Not Available;Not Available;Not Available	IV;IV;IV	NO;NO;NO	Chemotherapy;Chemotherapy;Chemotherapy	Not Available;Not Available;Not Available	120;60;480	mg;mg/m2;mg	Not Available;Not Available;Not Available	2009;2009;2009	Not Available	NOT HISPANIC OR LATINO	TCGA-09-1668-F24300	4c6e3ed8-1d30-4366-96fc-60bfa0104dfd
TCGA-04-1651	FEMALE	1102	Serous Cystadenocarcinoma	Ovary	Dead	Stage IIIC	G3	1	990		Recurrence	Not Available		53	Bilateral	TCGA-04-1651	55153632-1673-487a-85c0-f156377db1fc	2	-19628	1102	0	Not Available	TCGA-04-1651-D24175;TCGA-04-1651-D24176;TCGA-04-1651-D24174;TCGA-04-1651-D24173;TCGA-04-1651-D24177	50b984e7-efd8-4d76-9551-883eeda43257;49f8c5a0-530d-41d5-93aa-dd3accbc566d;a960436a-2466-4c72-8ef7-89b73f8a0114;2d418f76-5289-4b42-bccd-367cc6177bdd;302abefb-98a4-4ae9-b633-f083742d1dcc	Not Available;Not Available;Not Available;Not Available;Not Available	10;10;10;10;10	150;Not Available;150;150;Not Available	24;638;24;24;994	Taxol;Cisplatin;Carboplatin;Gemcitibine;Gemcitibine	Not Available;Not Available;Not Available;Not Available;Not Available	11;11;11;11;11	06;Not Available;06;06;Not Available	Not Available;Not Available;Not Available;Not Available;Not Available	mg;Not Available;mg;mg;Not Available	ADJUVANT;PROGRESSION;ADJUVANT;ADJUVANT;PROGRESSION	Not Applicable;Not Applicable;Not Applicable;Not Applicable;Not Applicable	Not Available;Not Available;Not Available;Not Available;Not Available	IV;IV;IV;IV;IV	NO;NO;NO;NO;NO	Chemotherapy;Chemotherapy;Chemotherapy;Chemotherapy;Chemotherapy	Not Available;Not Available;Not Available;Not Available;Not Available	1869;Not Available;3228;4416;Not Available	mg;Not Available;mg;mg;Not Available	Not Available;Not Available;Not Available;Not Available;Not Available	2009;2009;2009;2009;2009	1	NOT HISPANIC OR LATINO	TCGA-04-1651-F24172	f182f145-563e-4e9e-9d35-77b5e6e2dcae
TCGA-61-1904	FEMALE	276	Serous Cystadenocarcinoma	Ovary	Alive	Stage IIIC	G3	0	276			TUMOR FREE		60	Bilateral	TCGA-61-1904	2cdd5154-ee5c-4d67-b2eb-947dfaa56be2	1	-22009	Not Applicable	0	276	TCGA-61-1904-D28237;TCGA-61-1904-D28238	849f17c4-a3e6-4980-83f5-dd6cfc965087;9631e833-0db2-4797-ad8d-eebda0dea026	Not Available;Not Available	4;4	161;161	42;42	Taxotere;Cisplatin	Not Available;Not Available	12;12	05;05	Not Available;Not Available	mg;mg	ADJUVANT;ADJUVANT	Not Applicable;Not Applicable	Not Available;Not Available	IP;IV;IP;IV	NO;NO	Chemotherapy;Chemotherapy	Not Available;Not Available	720;2600	mg;mg	Not Available;Not Available	2009;2009	Not Available	NOT HISPANIC OR LATINO	TCGA-61-1904-F28236	babf7376-e2bc-4165-acda-25c8f38e15ca
TCGA-61-1738	FEMALE	1089	Serous Cystadenocarcinoma	Ovary	Dead	Stage IIIC	G3	1	276		Recurrence	WITH TUMOR		60	Right	TCGA-61-1738	72c40fba-f502-489b-ad87-843f52655894	2	-21965	1089	0	1089	TCGA-61-1738-D28194;TCGA-61-1738-D28196;TCGA-61-1738-D28195;TCGA-61-1738-D28193;TCGA-61-1738-D28191;TCGA-61-1738-D28192	0008d328-4bb3-4d4a-b5d0-28d09f97d2c3;265b0571-09c1-4944-b6d1-b8f6b8c01b1c;5cae6b69-090f-47c8-8713-2eaa5c448e60;b26e2e7f-9a62-4f34-90d4-d3463baaab74;b8292746-a108-4445-8ef5-59cea4a9b2b0;f55cc532-8bdd-4cad-ad7b-e462a95f6c05	Not Available;Not Available;Not Available;Not Available;Not Available;Not Available	4;4;4;4;4;4	338;843;658;276;135;135	287;709;422;198;21;21	Doxil;Gemzar;Toptecan;Cisplatin;Taxol;Carboplatin	Not Available;Not Available;Not Available;Not Available;Not Available;Not Available	12;12;12;12;12;12	03;06;29;04;06;06	Not Available;Not Available;Not Available;Not Available;Not Available;Not Available	mg;mg/m2;mg;mg;mg;AUC	RECURRENCE;RECURRENCE;RECURRENCE;ADJUVANT;ADJUVANT;ADJUVANT	Not Applicable;Not Applicable;Not Applicable;Not Applicable;Not Applicable;Not Applicable	Not Available;Not Available;Not Available;Not Available;Not Available;Not Available	IV;IV;IV;IP;IV;IV	NO;NO;NO;NO;NO;NO	Chemotherapy;Chemotherapy;Chemotherapy;Chemotherapy;Chemotherapy;Chemotherapy	Not Available;Not Available;Not Available;Not Available;Not Available;Not Available	210;6200;191.4;364;2376;5	mg;mg/m2;mg;mg;mg;AUC	Not Available;Not Available;Not Available;Not Available;Not Available;Not Available	2009;2009;2009;2009;2009;2009	Not Available	Not Available	TCGA-61-1738-F28190	8a114a36-f83c-41c5-9e9b-3f3e303592ca
TCGA-61-1919	FEMALE	1161	Serous Cystadenocarcinoma	Ovary	Dead	Stage IIIC	G2	1	439		Recurrence	Not Available		58	Bilateral	TCGA-61-1919	ce871097-a6e9-4139-897e-642ee24ee123	30	-21199	1161	0	1161																								Not Available	NOT HISPANIC OR LATINO	TCGA-61-1919-F28300	32f30aa0-9c9e-4a94-8b29-558fb4a1029f
TCGA-29-2436	FEMALE	297	Serous Cystadenocarcinoma	Ovary	Alive	Stage IIIC	G2	0	297			TUMOR FREE		36	Bilateral	TCGA-29-2436	295231ab-477b-4077-a368-db34f867102c	7	-13346	Not Applicable	0	297	TCGA-29-2436-D27515;TCGA-29-2436-D27516	5061e9ad-2cf6-4dd3-970c-57ce41b37689;906d31f6-1d9e-4baf-a9b5-2cb038fe599e	Not Available;Not Available	7;7	191;191	17;17	Paclitaxel;Carboplatin	Not Available;Not Available	6;6	06;06	275;870	mg;mg	ADJUVANT;ADJUVANT	Not Applicable;Not Applicable	Not Available;Not Available	IV;IV	NO;NO	Chemotherapy;Chemotherapy	Not Available;Not Available	1406;5220	mg;mg	Not Available;Not Available	2010;2010	Not Available	Not Available	TCGA-29-2436-F27514	1d73fbe8-7e0f-4030-a6ac-73851d305020
TCGA-36-2542	FEMALE	657	Serous Cystadenocarcinoma	Ovary	Alive	Stage IIIB	G3	0	657			TUMOR FREE		59	Bilateral	TCGA-36-2542	7aadc24b-3de2-478f-b9e5-aca44424f514	18	-21902	Not Applicable	0	657	TCGA-36-2542-D27943;TCGA-36-2542-D27944	c15888a5-ada4-4d21-bda0-cac3f969bd25;fb87fce9-8378-400b-913d-98bf43261971	Not Available;Not Available	18;18	152;159	25;25	Carboplatin;Paclitaxel	Not Available;Not Available	8;8	06;06	540;77	mg;mg	ADJUVANT;ADJUVANT	Not Applicable;Not Applicable	Not Available;Not Available	IV;IV	NO;NO	Chemotherapy;Chemotherapy	Not Available;Not Available	3240;1345	mg;mg	Not Available;Not Available	2010;2010	Not Available	NOT HISPANIC OR LATINO	TCGA-36-2542-F27942	a439d861-b6a1-45a9-a2d7-f3cd9c2603e0
TCGA-29-2431	FEMALE	1285	Serous Cystadenocarcinoma	Ovary	Alive	Stage IIIC	G2	1	960		Recurrence	WITH TUMOR		59	Bilateral	TCGA-29-2431	996313ef-11e7-459d-ba5f-ac1a4d0de513	4	-21833	Not Applicable	0	1285	TCGA-29-2431-D27486;TCGA-29-2431-D27490;TCGA-29-2431-D27487;TCGA-29-2431-D27488;TCGA-29-2431-D27489	e8857415-3e93-4361-930e-4ccb6671e0c1;4697eff4-cb13-4836-8a81-0e4382d5b5fe;02256292-b3b7-427a-9157-5147ef0ba72c;c63c5158-3a3d-4f97-92f7-c6cba8fdb995;90ddaf81-71b9-42e3-b499-498c241002c3	Not Available;Not Available;Not Available;Not Available;Not Available	4;4;4;4;4	138;390;138;1145;1145	33;33;33;977;977	Docetaxel;Bevacizumab;Oxaliplatin;Paclitaxel;Carboplatin	Not Available;Not Available;Not Available;Not Available;Not Available	6;6;6;6;6	06;Not Available;6;8;08	140;1120;160;335;530	mg;mg;mg;mg;mg	ADJUVANT;ADJUVANT;ADJUVANT;RECURRENCE;RECURRENCE	Not Applicable;Not Applicable;Not Applicable;Not Applicable;Not Applicable	Not Available;Not Available;Not Available;Not Available;Not Available	IV;IV;IV;IV;IV	NO;NO;NO;NO;NO	Chemotherapy;Targeted Molecular therapy;Chemotherapy;Chemotherapy;Chemotherapy	Not Available;Not Available;Not Available;Not Available;Not Available	Not Available;Not Available;Not Available;Not Available;Not Available	mg;mg;mg;mg;mg	Not Available;Not Available;Not Available;Not Available;Not Available	2010;2010;2010;2010;2010	0	Not Available	TCGA-29-2431-F27485	660c77d7-5cc1-458b-940f-993ed928fa78
TCGA-61-1906	FEMALE	1038	Serous Cystadenocarcinoma	Ovary	Dead	Stage IIIC	G3	1	236		Recurrence	WITH TUMOR		55	Bilateral	TCGA-61-1906	f553e953-6464-421f-8933-26ca82cb79d3	1	-20378	1038	0	1038	TCGA-61-1906-D28248;TCGA-61-1906-D28241;TCGA-61-1906-D28242;TCGA-61-1906-D28247;TCGA-61-1906-D28243;TCGA-61-1906-D28245;TCGA-61-1906-D28244;TCGA-61-1906-D28246	08069844-2b07-4cb9-ba89-13dc8ef3efcc;ad137f25-8a5c-497a-a23c-cc32c105dbf9;3df3ef68-bd63-40f3-8aac-cda81634d52e;256a66da-facb-406a-b470-479d7de669f4;bc864245-d830-48e2-b862-7ee8c983f05d;d096b01e-2201-4d76-8e34-adaf4f8cd7f9;f5a0e7fc-c6ea-43b4-89f5-f51891c4f550;10f0eb71-7ac1-4247-ac2f-0c1943154b96	Not Available;Not Available;Not Available;Not Available;Not Available;Not Available;Not Available;Not Available	4;4;4;4;4;4;4;4	1038;153;153;1038;321;484;391;484	489;27;27;489;279;400;335;400	Carboplatin;Carboplatin;Taxol;Taxol;Topotecan;Gemzar;Doxil;Avastin	Not Available;Not Available;Not Available;Not Available;Not Available;Not Available;Not Available;Not Available	12;12;12;12;12;12;12;12	10;06;06;10;02;04;03;04	Not Available;Not Available;Not Available;Not Available;Not Available;Not Available;Not Available;Not Available	AUC;AUC;mg;mg;mg;mg;mg;mg	RECURRENCE;ADJUVANT;ADJUVANT;RECURRENCE;RECURRENCE;RECURRENCE;RECURRENCE;RECURRENCE	Not Applicable;Not Applicable;Not Applicable;Not Applicable;Not Applicable;Not Applicable;Not Applicable;Not Applicable	Not Available;Not Available;Not Available;Not Available;Not Available;Not Available;Not Available;Not Available	IV;IV;IV;IV;IV;IV;IV;IV	NO;NO;NO;NO;NO;NO;NO;NO	Chemotherapy;Chemotherapy;Chemotherapy;Chemotherapy;Chemotherapy;Chemotherapy;Chemotherapy;Chemotherapy	Not Available;Not Available;Not Available;Not Available;Not Available;Not Available;Not Available;Not Available	5;6;2076;1500;7.8;1600;234;1000	AUC;AUC;mg;mg;mg;mg;mg;mg	Not Available;Not Available;Not Available;Not Available;Not Available;Not Available;Not Available;Not Available	2009;2009;2009;2009;2009;2009;2009;2009	Not Available	NOT HISPANIC OR LATINO	TCGA-61-1906-F28240	a3385a59-9fd2-4e64-b6c4-6d6169bf5042
TCGA-25-2404	FEMALE	883	Serous Cystadenocarcinoma	Ovary	Dead	Stage IIIC	G3	1	426		Recurrence	WITH TUMOR		38	Bilateral	TCGA-25-2404	22178c3c-6b04-46d8-8041-dc83fa195029	5	-14184	883	0	883	TCGA-25-2404-D26832;TCGA-25-2404-D26835;TCGA-25-2404-D26834;TCGA-25-2404-D26833	ee45824f-b834-4398-9099-e4d8084dda45;0e941bf3-b016-4c1b-950e-b8376803e7df;4123b5ea-9752-4c53-b3c4-a2caeb17b133;1b5f7082-be2b-44dd-a5b6-9dc5903110fc	Not Available;Not Available;Not Available;Not Available	5;5;5;5	122;306;306;122	0;184;184;0	Taxol;Carboplatin;Taxol;Carboplatin	Not Available;Not Available;Not Available;Not Available	1;1;1;1	06;04;04;06	Not Available;Not Available;Not Available;Not Available	Not Available;Not Available;Not Available;Not Available	ADJUVANT;RECURRENCE;RECURRENCE;ADJUVANT	Not Applicable;Not Applicable;Not Applicable;Not Applicable	Not Available;Not Available;Not Available;Not Available	IV;IV;IV;IV	NO;NO;NO;NO	Chemotherapy;Chemotherapy;Chemotherapy;Chemotherapy	Not Available;Not Available;Not Available;Not Available	Not Available;Not Available;Not Available;Not Available	Not Available;Not Available;Not Available;Not Available	Not Available;Not Available;Not Available;Not Available	2010;2010;2010;2010	Not Available	NOT HISPANIC OR LATINO	TCGA-25-2404-F26831	8b0b1002-3ed9-4317-ba15-982dc5522748
TCGA-29-A5NZ	FEMALE	1088	Serous Cystadenocarcinoma	Omentum	Dead	Stage IIIC	G3	1	697		Recurrence	WITH TUMOR		66	Not Available	TCGA-29-A5NZ	F1CB3D48-1415-408D-89D1-DFDCC5924963	20	-24161	1088	0	Not Available	TCGA-29-A5NZ-D59533;TCGA-29-A5NZ-D59534;TCGA-29-A5NZ-D59535;TCGA-29-A5NZ-D59537;TCGA-29-A5NZ-D59532;TCGA-29-A5NZ-D59536	061ED9E3-C6F0-4348-9A32-9FAAD64DC411;2ABD0BB8-6960-48F8-B08D-28AB17CF9FE6;55F4F735-7B13-4FA5-8105-4B4D8480A870;F3B64637-8466-489E-AAE7-0CB2CD1E80C6;B8A9B895-3774-4B7A-8E4E-601BAEEB0C3B;F16C6D42-2092-4457-B4B5-D5F1169B78FD	Not Available;Not Available;Not Available;Not Available;Not Available;Not Available	14;14;14;14;14;14	151;543;543;Not Available;151;817	25;396;396;893;25;686	Paclitaxel;Carboplatin;Doxil;paclitaxel;Carboplatin;Gemzar	Complete Response;Partial Response;Partial Response;Not Applicable;Complete Response;Clinical Progressive Disease	5;5;5;5;5;5	Not Available;Not Available;Not Available;Not Available;Not Available;Not Available	Not Available;Not Available;Not Available;Not Available;Not Available;Not Available	Not Available;Not Available;Not Available;Not Available;Not Available;Not Available	Not Available;Not Available;Not Available;Not Available;Not Available;Not Available	Not Applicable;Not Applicable;Not Applicable;Not Applicable;Not Applicable;Not Applicable	Not Available;Not Available;Not Available;Not Available;Not Available;Not Available	Not Available;Not Available;Not Available;Not Available;Not Available;Not Available	NO;NO;NO;YES;NO;NO	Not Available;Not Available;Not Available;Not Available;Not Available;Not Available	Not Available;Not Available;Not Available;Not Available;Not Available;Not Available	Not Available;Not Available;Not Available;Not Available;Not Available;Not Available	Not Available;Not Available;Not Available;Not Available;Not Available;Not Available	YES;NO;NO;YES;YES;NO	2014;2014;2014;2014;2014;2014	Not Available	Not Available	TCGA-29-A5NZ-F59530;TCGA-29-A5NZ-F59529;TCGA-29-A5NZ-F59527	3BFD1FFC-178F-453E-9445-6C4AE268123F;3E121B6F-76A2-4617-ABF1-77F50BA1FD3A;B059FE0D-3A99-4FB1-AFEB-7E44CA131810
TCGA-13-A5FT	FEMALE	2143	Serous Cystadenocarcinoma	Ovary	Alive	Stage IIIC	G3	0	2143			TUMOR FREE		67	Bilateral	TCGA-13-A5FT	F3618472-32DC-4C90-A407-90050F68BE85	26	-24743	Not Applicable	0	1296	TCGA-13-A5FT-D43570;TCGA-13-A5FT-D43571	36283F3D-1E06-4D7C-A64E-DF9B07460DD9;F6311109-F942-40EE-BBC7-BC3334388892	Not Available;Not Available	26;26	111;117	49;48	Cisplatin;Paclitaxel	Complete Response;Complete Response	5;5	Not Available;Not Available	Not Available;Not Available	Not Available;Not Available	Not Available;Not Available	Not Applicable;Not Applicable	Not Available;Not Available	Not Available;Not Available	NO;NO	Chemotherapy;Chemotherapy	Not Available;Not Available	Not Available;Not Available	Not Available;Not Available	NO;NO	2013;2013	Not Available	Not Evaluated	TCGA-13-A5FT-F58072;TCGA-13-A5FT-F72595	47557746-8652-4B47-8CA5-06831E01FA32;EB441837-961C-4E2E-BBF4-B2CB721E586E
TCGA-25-2391	FEMALE	1492	Serous Cystadenocarcinoma	Ovary	Dead	Stage IIIC	G3	0	1492			TUMOR FREE		57	Bilateral	TCGA-25-2391	f5033d52-ec36-4e67-88d8-b6d898b81b2f	5	-20939	1492	0	1492	TCGA-25-2391-D26798;TCGA-25-2391-D26797;TCGA-25-2391-D26799	80def7b0-0486-484f-b014-381d703f1ff1;416777aa-730e-4ecb-9f3e-193f5095066c;c57fb4b0-6cdc-4067-95a8-0f82c14e07ac	Not Available;Not Available;Not Available	5;5;5	153;153;153	31;31;31	Taxol;Carboplatin;Taxotere	Not Available;Not Available;Not Available	1;1;1	05;06;01	Not Available;Not Available;Not Available	Not Available;Not Available;Not Available	ADJUVANT;ADJUVANT;ADJUVANT	Not Applicable;Not Applicable;Not Applicable	Not Available;Not Available;Not Available	IV;IV;IV	Not Available;NO;NO	Chemotherapy;Chemotherapy;Chemotherapy	Not Available;Not Available;Not Available	Not Available;Not Available;Not Available	Not Available;Not Available;Not Available	Not Available;Not Available;Not Available	2010;2010;2010	Not Available	NOT HISPANIC OR LATINO	TCGA-25-2391-F26796	6ec2f13a-7241-400e-ba92-e194af3034c7
TCGA-24-1469	FEMALE	277	Serous Cystadenocarcinoma	Ovary	Alive	Stage IIIC	G3	0	277			TUMOR FREE		71	Right	TCGA-24-1469	cd6e5d3d-1c86-40dd-9cb3-b2e2075dec56	13	-25937	Not Applicable	0	277	TCGA-24-1469-D26062;TCGA-24-1469-D26061	8b7e3c93-43ce-4a4c-88e0-eebfe8e5373a;0669881e-ea31-48f5-a8fb-5f91b62e6e9c	Not Available;Not Available	13;13	135;135	Not Available;Not Available	Taxol;Carboplatin	Not Available;Not Available	5;5	06;06	Not Available;Not Available	Not Available;Not Available	ADJUVANT;ADJUVANT	Not Applicable;Not Applicable	Not Available;Not Available	IV;IV	NO;NO	Chemotherapy;Chemotherapy	Not Available;Not Available	Not Available;Not Available	Not Available;Not Available	Not Available;Not Available	2009;2009	Not Available	Not Available	TCGA-24-1469-F26060	a5d9372b-c1cc-4361-84ee-e8d6dd21dcfb
TCGA-30-1853	FEMALE	1103	Serous Cystadenocarcinoma	Ovary	Dead	Stage IIIC	G3	1	634		Recurrence	WITH TUMOR		58	Bilateral	TCGA-30-1853	5d603bba-62e6-48fb-b8fc-401109abcaee	2	-21404	1103	0	1103	TCGA-30-1853-D27543;TCGA-30-1853-D27544;TCGA-30-1853-D27546;TCGA-30-1853-D27548;TCGA-30-1853-D27545;TCGA-30-1853-D27547	8a8fea1c-af3d-4d12-abe1-1732158991df;02e54e5c-6ffc-4742-92ba-1de798919bf9;d1cdcf9f-1d4f-495b-9ca3-3f1820988c17;87eb4360-2370-42e4-9920-32b4be6791ba;23159ed1-9189-4f06-bf1f-100d10cfbf8b;aee7c046-3c2e-4a58-80b4-4b642c08a7e9	Not Available;Not Available;Not Available;Not Available;Not Available;Not Available	28;28;28;28;28;28	778;126;778;1011;126;932	669;42;669;950;42;886	Carboplatin;Carboplatin;Taxol;Doxil;Taxol;Trabectedin	Not Available;Not Available;Not Available;Not Available;Not Available;Not Available	12;12;12;12;12;12	06;06;06;Not Available;06;03	Not Available;Not Available;Not Available;Not Available;Not Available;Not Available	AUC;AUC;mg/m2;mg/m2;mg/m2;mg/m2	RECURRENCE;ADJUVANT;RECURRENCE;PROGRESSION;ADJUVANT;PROGRESSION	Not Applicable;Not Applicable;Not Applicable;Not Applicable;Not Applicable;Not Applicable	Not Available;Not Available;Not Available;Not Available;Not Available;Not Available	IV;IV;IV;IV;IV;IV	NO;NO;NO;NO;NO;NO	Chemotherapy;Chemotherapy;Chemotherapy;Chemotherapy;Chemotherapy;Chemotherapy	Not Available;Not Available;Not Available;Not Available;Not Available;Not Available	5;5;175;40;175;580	AUC;AUC;mg/m2;mg/m2;mg/m2;mg/m2	Not Available;Not Available;Not Available;Not Available;Not Available;Not Available	2009;2009;2009;2009;2009;2009	Not Available	NOT HISPANIC OR LATINO	TCGA-30-1853-F27542	333dfd72-26d5-496a-bcc6-c256a5360b5c
TCGA-24-1413	FEMALE	192	Serous Cystadenocarcinoma	Ovary	Alive	Stage IIIC	G3	0	192			TUMOR FREE		51	Bilateral	TCGA-24-1413	3fc8f799-5bd3-4f48-baf0-c458ce86ab7e	9	-18846	Not Applicable	0	192	TCGA-24-1413-D25911;TCGA-24-1413-D25912	2c6dac55-044c-46d6-a296-897bda1add73;86d3680c-7af1-4bcf-9466-ac5d0d032144	Not Available;Not Available	9;27	145;145	34;34	Paclitaxel;Carboplatin	Not Available;Not Available	3;3	6;6	Not Available;Not Available	mg;mg	ADJUVANT;ADJUVANT	Not Applicable;Not Applicable	Not Available;Not Available	IV;IV	Not Available;Not Available	Chemotherapy;Chemotherapy	Not Available;Not Available	1340;3864	mg;mg	Not Available;Not Available	2009;2009	Not Available	Not Available	TCGA-24-1413-F25910	00e61bdc-fccd-47a7-bd23-8ce0506d6b7b
TCGA-30-1866	FEMALE	1114	Serous Cystadenocarcinoma	Ovary	Dead	Stage IV	G2	1	285		Recurrence	WITH TUMOR		61	Bilateral	TCGA-30-1866	cbc7f427-5f7b-4267-ad56-055d8880a4cc	2	-22562	1114	0	1114	TCGA-30-1866-D27603;TCGA-30-1866-D27599;TCGA-30-1866-D27601;TCGA-30-1866-D27596;TCGA-30-1866-D27600;TCGA-30-1866-D27602;TCGA-30-1866-D27598;TCGA-30-1866-D27597	e1c6ebe7-8c5c-4199-a06f-ab66088a058b;c64a880a-85be-42d3-8378-642a1f1dce7f;e9f71e7a-9032-4e6d-8906-57b4fa5f37b8;898a6998-0b59-4803-ba74-26e008181c0e;41f27513-1242-4061-a85b-c2884f60a85c;70f90115-e87d-47e9-bf4f-7456761ae58e;6b21b434-6af0-431c-90dd-0fc0118ede26;42b5deb5-1f12-40c6-b3c9-532ec204c50a	Not Available;Not Available;Not Available;Not Available;Not Available;Not Available;Not Available;Not Available	28;28;28;28;28;28;28;28	Not Available;Not Available;Not Available;Not Available;Not Available;Not Available;126;126	Not Available;Not Available;Not Available;265;Not Available;Not Available;19;19	Taxol;Carboplatin;Topotecan;Doxil;Gemcitabine;Gemcitabine;Carboplatin;Taxol	Not Available;Not Available;Not Available;Not Available;Not Available;Not Available;Not Available;Not Available	12;12;12;12;12;12;12;12	Not Available;08;Not Available;06;08;Not Available;06;06	Not Available;Not Available;Not Available;Not Available;Not Available;Not Available;Not Available;Not Available	Not Available;Not Available;Not Available;Not Available;Not Available;Not Available;Not Available;Not Available	PROGRESSION;PROGRESSION;PROGRESSION;RECURRENCE;PROGRESSION;PROGRESSION;ADJUVANT;ADJUVANT	Not Applicable;Not Applicable;Not Applicable;Not Applicable;Not Applicable;Not Applicable;Not Applicable;Not Applicable	Not Available;Not Available;Not Available;Not Available;Not Available;Not Available;Not Available;Not Available	IV;IV;IV;IV;IV;IV;IV;IV	NO;NO;NO;NO;NO;NO;NO;NO	Chemotherapy;Chemotherapy;Chemotherapy;Chemotherapy;Chemotherapy;Chemotherapy;Chemotherapy;Chemotherapy	Not Available;Not Available;Not Available;Not Available;Not Available;Not Available;Not Available;Not Available	Not Available;Not Available;Not Available;Not Available;Not Available;Not Available;Not Available;Not Available	Not Available;Not Available;Not Available;Not Available;Not Available;Not Available;Not Available;Not Available	Not Available;Not Available;Not Available;Not Available;Not Available;Not Available;Not Available;Not Available	2009;2009;2009;2009;2009;2009;2009;2009	Not Available	NOT HISPANIC OR LATINO	TCGA-30-1866-F27595	105fdc97-99c0-4fb1-ae9d-4361199bbfc9
TCGA-13-1511	FEMALE	1650	Serous Cystadenocarcinoma	Ovary	Dead	Stage IV	G3	1	459			WITH TUMOR		52	Bilateral	TCGA-13-1511	756f6768-e69a-4fe9-aa41-7c58aabe4577	31	-19258	Not Applicable	0	119	TCGA-13-1511-D24966;TCGA-13-1511-D24968;TCGA-13-1511-D24967	4247d127-1642-4e0e-b9e0-63c1f16c4436;8c238471-c7de-4922-875e-68b8c9ee6f25;311d0b25-b216-4f8d-a58a-b484fff48914	Not Available;Not Available;Not Available	29;1;1	46;186;186	21;67;67	Carboplatin;Gemcitabine;Carboplatin	Not Available;Not Available;Not Available	6;2;2	2;6;6	Not Available;800;600	Not Available;mg/m2;mg	ADJUVANT;ADJUVANT;ADJUVANT	Not Applicable;Not Applicable;Not Applicable	Not Available;Not Available;Not Available	IV;IV;IV	NO;NO;NO	Chemotherapy;Chemotherapy;Chemotherapy	Not Available;Not Available;Not Available	5;Not Available;Not Available	Not Available;mg/m2;mg	Not Available;Not Available;Not Available	2009;2010;2010	Not Available	NOT HISPANIC OR LATINO	TCGA-13-1511-F24965;TCGA-13-1511-F72680	4b9ab047-2f5e-4454-8f69-f40a45d563cf;90AE922B-8B77-4051-AD1D-62E91F80323A
TCGA-61-2092	FEMALE	1573	Serous Cystadenocarcinoma	Ovary	Alive	Stage IIIC	G3	0	1573			TUMOR FREE		57	Bilateral	TCGA-61-2092	c183d3fb-2eee-44f8-890e-b9bf907141e6	8	-21072	Not Applicable	0	1573	TCGA-61-2092-D28383;TCGA-61-2092-D28382	310d2d4f-8dad-40ae-b4e9-74aad0299ebd;1690eed1-9060-4323-bdef-31b6bfdd2e65	Not Available;Not Available	8;8	160;160	41;41	Carboplatin;Taxol	Not Available;Not Available	12;12	06;06	Not Available;Not Available	Not Available;Not Available	ADJUVANT;ADJUVANT	Not Applicable;Not Applicable	Not Available;Not Available	IV;IV	NO;NO	Chemotherapy;Chemotherapy	Not Available;Not Available	Not Available;Not Available	Not Available;Not Available	Not Available;Not Available	2009;2009	Not Available	Not Available	TCGA-61-2092-F28381	fbfa4e68-8edf-44d8-84cb-ced0ddad76bd
TCGA-13-0714	FEMALE	189	Serous Cystadenocarcinoma	Ovary	Dead	Stage IV	G3	1	110		Progression of Disease	WITH TUMOR		55	Bilateral	TCGA-13-0714	1e14f098-17b2-4f54-8e4f-e38088008df7	24	-20109	189	0	189	TCGA-13-0714-D24492;TCGA-13-0714-D24490;TCGA-13-0714-D24491	e54432b5-99df-4c39-b995-647542102aaf;8ca3dedd-47ab-4034-aab2-6050c4600c4a;9d443d74-433e-4f6f-8591-4a482fc81098	Not Available;Not Available;Not Available	15;15;15	Not Available;Not Available;Not Available	12;12;12	Gemcitabine;Carboplatin;Paclitaxel	Not Available;Not Available;Not Available	4;4;4	4;4;4	Not Available;Not Available;Not Available	Not Available;Not Available;mg/m2	ADJUVANT;ADJUVANT;ADJUVANT	Not Applicable;Not Applicable;Not Applicable	Not Available;Not Available;Not Available	IV;PO;IV	NO;NO;NO	Chemotherapy;Chemotherapy;Chemotherapy	Not Available;Not Available;Not Available	Not Available;5;175	Not Available;Not Available;mg/m2	Not Available;Not Available;Not Available	2009;2009;2009	Not Available	NOT HISPANIC OR LATINO	TCGA-13-0714-F24489	7fe913a4-d022-4890-a2a8-82c1b9c72755
TCGA-59-2372	FEMALE	1363	Serous Cystadenocarcinoma	Ovary	Dead	Stage IIIC	G2	0	1363			Not Available		73	Bilateral	TCGA-59-2372	5d8abed4-62b3-4e17-a8ce-9f6028e97103	12	Not Available	1363	0	Not Available	TCGA-59-2372-D28120;TCGA-59-2372-D28121	791be596-c56b-401b-8e73-0067dcd7484f;ae86c082-8c04-4078-bd1e-b303705819cd	Not Available;Not Available	15;15	Not Available;Not Available	Not Available;Not Available	Carboplatin;Taxol	Not Available;Not Available	3;3	4;4	Not Available;Not Available	Not Available;Not Available	ADJUVANT;ADJUVANT	Not Applicable;Not Applicable	Not Available;Not Available	Not Available;Not Available	Not Available;Not Available	Chemotherapy;Chemotherapy	Not Available;Not Available	Not Available;Not Available	Not Available;Not Available	Not Available;Not Available	2010;2010	Not Available	NOT HISPANIC OR LATINO	TCGA-59-2372-F28119	775d5554-2b75-4382-9f09-177790839905
TCGA-23-1809	FEMALE	16	Serous Cystadenocarcinoma	Ovary	Alive	Stage IIC	G3	0	16			Not Available		63	Right	TCGA-23-1809	bc3e0b74-ea09-46a5-9f61-16bd15ffd883	2	-23111	Not Applicable	0	16	TCGA-23-1809-D25754;TCGA-23-1809-D25755	548a5293-e55f-4f0d-aea8-880f79908766;6dab45bd-9189-4f7a-a844-85635ed7cbf7	Not Available;Not Available	9;9	107;107	24;24	Paclitaxel;Carboplatin	Not Available;Not Available	12;12	05;05	Not Available;Not Available	mg;mg	ADJUVANT;ADJUVANT	Not Applicable;Not Applicable	Not Available;Not Available	IV;IV	NO;NO	Chemotherapy;Chemotherapy	Not Available;Not Available	1495;1898	mg;mg	Not Available;Not Available	2009;2009	Not Available	NOT HISPANIC OR LATINO	TCGA-23-1809-F25753	834f38af-e051-41c8-aae9-1f2ff067b02e
TCGA-04-1348	FEMALE	1483	Serous Cystadenocarcinoma	Ovary	Dead	Stage IIIB	G3	1	575		Recurrence	WITH TUMOR		44	Bilateral	TCGA-04-1348	f7752d6e-f9cd-4dc9-ab01-3ab87acb21e4	26	-16236	1483	0	Not Available	TCGA-04-1348-D23971;TCGA-04-1348-D23968;TCGA-04-1348-D23972;TCGA-04-1348-D23970;TCGA-04-1348-D23975;TCGA-04-1348-D23974;TCGA-04-1348-D23969;TCGA-04-1348-D23973	d3abae36-f4b5-4d43-b4f8-af47f4ad136e;98897791-90ee-47b0-a526-1c8571b319a8;396df1c7-00b5-467a-965a-fbd8b603be40;bb7bed55-0fc3-4776-9cfe-59bd4adbbe7a;7e036a8c-1559-4399-885d-8a1e4d32ed53;9ae97b2d-2789-4e9c-97a4-28a084433803;06f08769-e9a9-463f-9dc2-feddab17d6a0;90f7c316-6484-466c-8ed0-6b2808bbdf32	Not Available;Not Available;Not Available;Not Available;Not Available;Not Available;Not Available;Not Available	17;17;17;17;17;17;17;17	976;184;1157;853;1432;1249;184;1157	884;2;1006;672;1279;1218;2;1006	Topotecan;Taxol;Cisplatin/Gemzar;Doxil;Doxil;Taxotere;Carboplatin;Gemzar	Not Available;Not Available;Not Available;Not Available;Not Available;Not Available;Not Available;Not Available	11;11;11;11;11;11;11;11	Not Available;8;9;7;Not Available;3;8;9	Not Available;Not Available;Not Available;Not Available;Not Available;Not Available;Not Available;Not Available	Not Available;Not Available;Not Available;Not Available;Not Available;Not Available;Not Available;Not Available	RECURRENCE;ADJUVANT;RECURRENCE;RECURRENCE;RECURRENCE;RECURRENCE;ADJUVANT;RECURRENCE	Not Applicable;Not Applicable;Not Applicable;Not Applicable;Not Applicable;Not Applicable;Not Applicable;Not Applicable	Not Available;Not Available;Not Available;Not Available;Not Available;Not Available;Not Available;Not Available	IV;IV;IV;IV;IV;IV;IV;IV	NO;NO;NO;NO;NO;NO;NO;NO	Chemotherapy;Chemotherapy;Chemotherapy;Chemotherapy;Chemotherapy;Chemotherapy;Chemotherapy;Chemotherapy	Not Available;Not Available;Not Available;Not Available;Not Available;Not Available;Not Available;Not Available	Not Available;Not Available;Not Available;Not Available;Not Available;Not Available;Not Available;Not Available	Not Available;Not Available;Not Available;Not Available;Not Available;Not Available;Not Available;Not Available	Not Available;Not Available;Not Available;Not Available;Not Available;Not Available;Not Available;Not Available	2009;2009;2009;2009;2009;2009;2009;2009	Not Available	HISPANIC OR LATINO	TCGA-04-1348-F23967	4bd91396-4007-4ff3-9673-58e37b089fe6
TCGA-13-0800	FEMALE	2661	Serous Cystadenocarcinoma	Ovary	Alive	Stage IIIC	G3	1	1396			TUMOR FREE		52	Bilateral	TCGA-13-0800	390eed6b-50af-48a9-9fd6-3a68a2bbb7f9	25	-19087	Not Applicable	0	247	TCGA-13-0800-D24616;TCGA-13-0800-D24617;TCGA-13-0800-D24618	9a8cf2ea-d928-477e-800a-2201bdeb5b9f;ff5f69d5-3de1-4738-9a02-dbe76765b393;7686a479-629f-4b7f-9af3-a7179af92576	Not Available;Not Available;Not Available	15;15;15	142;142;142	30;30;30	Cisplatin;Paclitaxel;Paclitaxel	Not Available;Not Available;Not Available	4;4;4	6;6;6	Not Available;Not Available;Not Available	mg/m2;mg/m2;mg/m2	ADJUVANT;ADJUVANT;ADJUVANT	Not Applicable;Not Applicable;Not Applicable	Not Available;Not Available;Not Available	IP;IV;IP	NO;NO;NO	Chemotherapy;Chemotherapy;Chemotherapy	Not Available;Not Available;Not Available	Not Available;Not Available;Not Available	mg/m2;mg/m2;mg/m2	Not Available;Not Available;Not Available	2009;2009;2009	Not Available	NOT HISPANIC OR LATINO	TCGA-13-0800-F24615;TCGA-13-0800-F72612	217432e2-4489-425f-a6e6-79c90c55f1f9;2BAB540D-033B-48FE-929E-8B36399D71D7
TCGA-59-2354	FEMALE	1046	Serous Cystadenocarcinoma	Ovary	Dead	Stage IIIC	G3	1	462		Progression of Disease	WITH TUMOR		63	Left	TCGA-59-2354	d7925dfc-18ce-46ab-a47b-9d06eacc96d0	29	Not Available	1046	0	Not Available	TCGA-59-2354-D28109;TCGA-59-2354-D28108	a31debf1-cc26-497d-8434-113fc8930b99;efd422e2-ed42-4926-ac5f-947cb1a6f888	Not Available;Not Available	31;31	Not Available;Not Available	Not Available;Not Available	Not Available;Carboplatin	Not Available;Not Available	3;3	Not Available;Not Available	Not Available;Not Available	Not Available;Not Available	RECURRENCE;ADJUVANT	Not Applicable;Not Applicable	Not Available;Not Available	Not Available;Not Available	Not Available;Not Available	Chemotherapy;Chemotherapy	Not Available;Not Available	Not Available;Not Available	Not Available;Not Available	Not Available;Not Available	2010;2010	Not Available	NOT HISPANIC OR LATINO	TCGA-59-2354-F28107	43712126-05c8-4734-8834-ceeb5a6f0ffe
TCGA-24-1103	FEMALE	1646	Serous Cystadenocarcinoma	Ovary	Dead	Stage IIIC	G3	1	678		Recurrence	WITH TUMOR		50	Bilateral	TCGA-24-1103	f34aa3b6-e966-49c6-bc55-130545772c53	9	-18583	1646	0	1646	TCGA-24-1103-D25826;TCGA-24-1103-D25827;TCGA-24-1103-D25828;TCGA-24-1103-D25825;TCGA-24-1103-D25829;TCGA-24-1103-D25830;TCGA-24-1103-D25832;TCGA-24-1103-D25831	5c3acf57-141b-4ce6-91fe-581490c243ba;22f59aba-f17a-4a62-99f6-f823663235f8;31b255dd-31d7-4ed8-933f-d460bb56c52e;f44476cf-cc04-42d3-bb41-71b9b94dd313;ded5f911-f2be-4407-8843-973d988ec6b2;23789e95-afa2-45e4-863c-265228e4944c;e6d71b0b-52f3-46bb-9928-e8313c172b61;ba9a1f08-8120-426b-8d9e-75de1729a6ff	Not Available;Not Available;Not Available;Not Available;Not Available;Not Available;Not Available;Not Available	9;9;9;9;27;1;1;1	910;910;1127;127;127;1127;Not Available;Not Available	694;694;1016;19;19;1016;1625;1625	Topotecan;Navelbine;Taxotere;Taxol;Carboplatin;Carboplatin;Carboplatin;Taxotere	Not Available;Not Available;Not Available;Not Available;Not Available;Not Available;Not Available;Not Available	3;3;3;3;3;2;2;2	9;9;6;6;6;6;1;1	Not Available;Not Available;Not Available;Not Available;Not Available;Not Available;Not Available;Not Available	mg;mg;mg;mg;mg;mg;mg;mg	RECURRENCE;RECURRENCE;RECURRENCE;ADJUVANT;ADJUVANT;RECURRENCE;RECURRENCE;RECURRENCE	Not Applicable;Not Applicable;Not Applicable;Not Applicable;Not Applicable;Not Applicable;Not Applicable;Not Applicable	Not Available;Not Available;Not Available;Not Available;Not Available;Not Available;Not Available;Not Available	IV;IV;IV;IV;IV;IV;IP;IP	NO;NO;NO;NO;NO;NO;NO;NO	Chemotherapy;Chemotherapy;Chemotherapy;Chemotherapy;Chemotherapy;Chemotherapy;Chemotherapy;Chemotherapy	Not Available;Not Available;Not Available;Not Available;Not Available;Not Available;Not Available;Not Available	43.2;816;756;1920;2210;2322;347;130	mg;mg;mg;mg;mg;mg;mg;mg	Not Available;Not Available;Not Available;Not Available;Not Available;Not Available;Not Available;Not Available	2009;2009;2009;2009;2009;2010;2010;2010	Not Available	Not Available	TCGA-24-1103-F25824	37eac75a-a99b-46ea-ab5f-172ea3b9cbb4
TCGA-24-1471	FEMALE	36	Serous Cystadenocarcinoma	Ovary	Alive	Stage IIIC	G3	0	36			Not Available		60	Left	TCGA-24-1471	ceb19678-b453-4529-b6cb-d02f9cb101b4	13	-22081	Not Applicable	0	36	TCGA-24-1471-D26070;TCGA-24-1471-D26071	9214c29b-a67f-4762-9ca0-9297a0bad8ac;789f5290-ddbc-4a16-8398-ab5cb498b563	Not Available;Not Available	24;24	Not Available;Not Available	Not Available;Not Available	Not Available;GOG 218	Not Available;Not Available	5;5	Not Available;Not Available	Not Available;Not Available	Not Available;Not Available	ADJUVANT;ADJUVANT	Not Applicable;Not Applicable	Not Available;Not Available	Not Available;Not Available	Not Available;Not Available	Chemotherapy;Targeted Molecular therapy	Not Available;Not Available	Not Available;Not Available	Not Available;Not Available	Not Available;Not Available	2010;2010	Not Available	Not Available	TCGA-24-1471-F26069	4a48ca18-4453-402f-b1b1-f98c79a2793e
TCGA-04-1536	FEMALE	885	Serous Cystadenocarcinoma	Ovary	Dead	Stage IV	G3	1	498		Recurrence	WITH TUMOR		60	Bilateral	TCGA-04-1536	1fe19c6b-71d0-4b07-923b-74ea32210db0	3	-21939	885	0	Not Available	TCGA-04-1536-D24111;TCGA-04-1536-D24115;TCGA-04-1536-D24114;TCGA-04-1536-D24113;TCGA-04-1536-D24116;TCGA-04-1536-D24112	4c9cdf72-d881-4079-bec6-5453fe89239d;efdac1c1-cacb-45e9-8da2-5c9209fcda54;feed8215-093e-4fb3-a54c-38013eb6625f;57161b96-b564-4d9b-89ff-30dc8dee32c8;b895268f-eb7a-4293-9f10-6dbaea5fd999;049090d1-2734-4c0c-b1f1-d7fe561af4c8	Not Available;Not Available;Not Available;Not Available;Not Available;Not Available	9;9;9;9;9;9	232;Not Available;Not Available;232;Not Available;232	36;518;518;36;518;36	Carboplatin;Doxil;Carboplatin;Doxil;Taxotere;Taxol	Not Available;Not Available;Not Available;Not Available;Not Available;Not Available	11;11;11;11;11;11	08;Not Available;Not Available;08;Not Available;08	Not Available;Not Available;Not Available;Not Available;Not Available;Not Available	mg;Not Available;Not Available;mg;Not Available;mg	ADJUVANT;RECURRENCE;RECURRENCE;ADJUVANT;RECURRENCE;ADJUVANT	Not Applicable;Not Applicable;Not Applicable;Not Applicable;Not Applicable;Not Applicable	Not Available;Not Available;Not Available;Not Available;Not Available;Not Available	IV;Not Available;Not Available;IV;Not Available;IV	NO;NO;NO;NO;NO;NO	Chemotherapy;Chemotherapy;Chemotherapy;Chemotherapy;Chemotherapy;Chemotherapy	Not Available;Not Available;Not Available;Not Available;Not Available;Not Available	3360;Not Available;Not Available;188;Not Available;2125	mg;Not Available;Not Available;mg;Not Available;mg	Not Available;Not Available;Not Available;Not Available;Not Available;Not Available	2009;2009;2009;2009;2009;2009	0	Not Available	TCGA-04-1536-F24110	d2bb276e-782a-46a9-bbef-889f1b28b446
TCGA-04-1525	FEMALE	1167	Serous Cystadenocarcinoma	Ovary	Dead	Stage IIIC	G3	1	213		Recurrence	WITH TUMOR		47	Bilateral	TCGA-04-1525	2bb96e1e-6992-434d-83e5-2f03713b3911	3	-17469	1167	0	Not Available	TCGA-04-1525-D24102;TCGA-04-1525-D24101;TCGA-04-1525-D24100	45a99f98-e53d-40d6-891d-5787134ff44e;17234cea-5e59-4520-bb0c-3ab4230d7138;5ff6409a-b31a-4c1d-9be5-cb0e87dcd044	Not Available;Not Available;Not Available	10;10;10	464;184;184	436;16;16	Irolfluvin;Carboplatin;Taxotere	Not Available;Not Available;Not Available	11;11;11	Not Available;08;08	Not Available;Not Available;Not Available	mg;AUC;mg	PROGRESSION;ADJUVANT;ADJUVANT	Not Applicable;Not Applicable;Not Applicable	Not Available;Not Available;Not Available	Not Available;IP;IV;IP;IV	NO;NO;NO	Targeted Molecular therapy;Chemotherapy;Chemotherapy	Not Available;Not Available;Not Available	31;5;888	mg;AUC;mg	Not Available;Not Available;Not Available	2009;2009;2009	Not Available	NOT HISPANIC OR LATINO	TCGA-04-1525-F24099	375c3a71-0dc9-475a-bf5d-bea64f332b78
TCGA-20-0990	FEMALE	789	Serous Cystadenocarcinoma	Ovary	Alive	Stage IIIC	G3	1	871		Recurrence	WITH TUMOR		74	Bilateral	TCGA-20-0990	c9524775-6b50-4793-8858-24b6a6d3e4e6	23	-27170	Not Applicable	0	789	TCGA-20-0990-D25527;TCGA-20-0990-D25528;TCGA-20-0990-D25524;TCGA-20-0990-D25525;TCGA-20-0990-D25526	122c2ea5-7803-4149-88c4-b8601e1a2511;15ac365e-4f23-4eaf-aa92-f6b2dfaec21d;e4109126-8bb8-4994-b2c0-26b5599e62ca;00c73916-b074-4f01-8663-a17d24d71686;b8c952b4-928b-4ceb-b655-5db68e4da13c	Not Available;Not Available;Not Available;Not Available;Not Available	16;16;16;16;16	1174;1174;236;236;999	1034;1034;116;116;901	Carboplatin;Liposomal Doxorubican;Carboplatin;Paclitaxil;Gemcitabine	Not Available;Not Available;Not Available;Not Available;Not Available	3;3;3;3;3	06;06;06;06;05	Not Available;Not Available;Not Available;Not Available;Not Available	mg;mg;mg;mg/m2;mg	RECURRENCE;RECURRENCE;ADJUVANT;ADJUVANT;RECURRENCE	Not Applicable;Not Applicable;Not Applicable;Not Applicable;Not Applicable	Not Available;Not Available;Not Available;Not Available;Not Available	IV;IV;IV;IV;IV	Not Available;Not Available;Not Available;Not Available;Not Available	Chemotherapy;Chemotherapy;Chemotherapy;Chemotherapy;Chemotherapy	Not Available;Not Available;Not Available;Not Available;Not Available	320;47;480;175;1240	mg;mg;mg;mg/m2;mg	Not Available;Not Available;Not Available;Not Available;Not Available	2009;2009;2009;2009;2009	1	NOT HISPANIC OR LATINO	TCGA-20-0990-F25523	c08304fa-042d-4a64-a8c1-165686740dd1
TCGA-59-2352	FEMALE	286	Serous Cystadenocarcinoma	Ovary	Dead	Stage IIIC	G3	0	286			WITH TUMOR		78	Right	TCGA-59-2352	758e6b52-062e-4ca0-84d1-ea38477414ac	29	Not Available	286	0	Not Available																								Not Available	NOT HISPANIC OR LATINO
TCGA-VG-A8LO	FEMALE	24	Serous Cystadenocarcinoma	Ovary	Dead	Stage IV	GB	0	24			WITH TUMOR		55	Right	TCGA-VG-A8LO	8628F1B2-3763-4BA9-A375-083874BB18F2	25	-20274	24	0	Not Available	TCGA-VG-A8LO-D60809;TCGA-VG-A8LO-D60817	FC9C6E78-2625-4BFD-879D-1E1FFFD56E85;036051C3-A9BB-4A8E-B1F9-DC9174E397E2	Not Available;Not Available	26;26	8;8	8;8	paclitaxel;Carboplatin	Unknown;Unknown	6;6	Not Available;Not Available	Not Available;Not Available	Not Available;Not Available	Not Available;Not Available	Not Applicable;Not Applicable	Not Available;Not Available	Not Available;Not Available	NO;NO	Chemotherapy;Chemotherapy	Not Available;Not Available	Not Available;Not Available	Not Available;Not Available	NO;NO	2014;2014	4	NOT HISPANIC OR LATINO
TCGA-24-2297	FEMALE	1699	Serous Cystadenocarcinoma	Ovary	Dead	Stage IIIC	G3	0	1699			Not Available		56	Bilateral	TCGA-24-2297	2ab32e11-80d6-4ed0-a42e-da612219bbdd	26	-20487	1699	0	1699	TCGA-24-2297-D26614;TCGA-24-2297-D26613	bade886c-5107-470b-a559-711bc8169b7c;e6ac7e27-9cfb-4e5a-9db9-eeac915c3e23	Not Available;Not Available	26;26	153;153	19;19	Cytoxan;Carboplatin	Not Available;Not Available	2;2	06;06	Not Available;Not Available	mg;mg	ADJUVANT;ADJUVANT	Not Applicable;Not Applicable	Not Available;Not Available	IV;IV	NO;NO	Chemotherapy;Chemotherapy	Not Available;Not Available	5530;3981	mg;mg	Not Available;Not Available	2010;2010	Not Available	Not Available	TCGA-24-2297-F26612	02c7c92c-2df2-46d9-a3db-88f6135c8fd6
TCGA-13-1491	FEMALE	1595	Serous Cystadenocarcinoma	Ovary	Dead	Stage IIIC	G3	1	508		Recurrence	WITH TUMOR		55	Bilateral	TCGA-13-1491	c8febeef-8e7e-459e-88cb-8086692dc559	31	-20262	1595	0	1595	TCGA-13-1491-D24886;TCGA-13-1491-D24885;TCGA-13-1491-D24887	375f90a7-f4e6-4437-95a7-823503ea757c;c98fcc34-f54b-4813-97a9-80b88b3a26a1;3068ce31-34ef-41d5-98e5-2a49dde8ea1d	Not Available;Not Available;Not Available	30;30;30	154;154;401	42;42;245	Paciltaxel;Carboplatin;Paciltaxel	Not Available;Not Available;Not Available	6;6;6	6;6;6	Not Available;Not Available;Not Available	mg/m2;Not Available;mg/m2	ADJUVANT;ADJUVANT;ADJUVANT	Not Applicable;Not Applicable;Not Applicable	Not Available;Not Available;Not Available	IV;IV;IV	NO;NO;NO	Chemotherapy;Chemotherapy;Chemotherapy	Not Available;Not Available;Not Available	175;4;135	mg/m2;Not Available;mg/m2	Not Available;Not Available;Not Available	2009;2009;2009	Not Available	NOT HISPANIC OR LATINO	TCGA-13-1491-F24884	89c0fc41-0c77-4699-b8f9-44ca68ef7c2a
TCGA-25-1315	FEMALE	1583	Serous Cystadenocarcinoma	Ovary	Dead	Stage IIIC	G3	1	153		Progression of Disease	WITH TUMOR		50	Bilateral	TCGA-25-1315	635f5335-b008-428e-b005-615776a6643f	27	-18263	1583	0	1553	TCGA-25-1315-D26641;TCGA-25-1315-D26640;TCGA-25-1315-D26642;TCGA-25-1315-D26643;TCGA-25-1315-D26644	c395c2f1-e27d-4a82-81f6-4762e3f4988d;38092d51-5b3f-48c2-a4e2-05502242355f;d4f35481-a6a4-428f-a818-6234b6ced3c3;b8fab70f-4e15-47c4-8b5e-ab9d6db13556;c50db350-ba19-4e40-b7b1-7487af0619b7	Not Available;Not Available;Not Available;Not Available;Not Available	27;27;27;27;27	334;153;334;334;153	153;30;153;143;30	Taxol;Cisplatin;Carbo;Taxol;Taxol	Not Available;Not Available;Not Available;Not Available;Not Available	3;3;3;3;3	Not Available;6;6;2;6	Not Available;Not Available;Not Available;Not Available;Not Available	Not Available;Not Available;Not Available;Not Available;Not Available	PROGRESSION;ADJUVANT;PROGRESSION;PROGRESSION;ADJUVANT	Not Applicable;Not Applicable;Not Applicable;Not Applicable;Not Applicable	Not Available;Not Available;Not Available;Not Available;Not Available	IV;IV;IV;IV;IV	NO;NO;NO;Not Available;NO	Chemotherapy;Chemotherapy;Chemotherapy;Chemotherapy;Chemotherapy	Not Available;Not Available;Not Available;Not Available;Not Available	Not Available;Not Available;Not Available;Not Available;Not Available	Not Available;Not Available;Not Available;Not Available;Not Available	Not Available;Not Available;Not Available;Not Available;Not Available	2009;2009;2009;2009;2009	Not Available	NOT HISPANIC OR LATINO	TCGA-25-1315-F26639	5f76897a-afa8-4e00-a593-08ad2e7a93d7
TCGA-61-2008	FEMALE	932	Serous Cystadenocarcinoma	Ovary	Alive	Stage IIC	G2	1	818		Recurrence	WITH TUMOR		40	Bilateral	TCGA-61-2008	3ac45a71-c463-4f0f-b030-58c475a34418	8	-14791	Not Applicable	0	932	TCGA-61-2008-D28339;TCGA-61-2008-D28336;TCGA-61-2008-D28338;TCGA-61-2008-D28337;TCGA-61-2008-D28335	f5583f7b-a50c-4bf5-a9c9-11a8333d4781;d05da628-44eb-4405-8981-f0723b085b60;5258713d-41d6-476f-9869-3f98a9284455;e3ffc3a5-5a6b-4053-a5c4-3a61628c98ce;aae34ce1-d57d-4c05-924f-9c8a7cbc4f8f	Not Available;Not Available;Not Available;Not Available;Not Available	8;8;8;8;8	979;149;979;979;149	861;29;861;861;29	Taxol;Taxotere;Cisplatin;Taxol;Carboplatin	Not Available;Not Available;Not Available;Not Available;Not Available	12;12;12;12;12	06;06;06;06;06	Not Available;Not Available;Not Available;Not Available;Not Available	mg;mg;mg;mg;mg	RECURRENCE;ADJUVANT;RECURRENCE;RECURRENCE;ADJUVANT	Not Applicable;Not Applicable;Not Applicable;Not Applicable;Not Applicable	Not Available;Not Available;Not Available;Not Available;Not Available	IP;IV;IP;IV;IV;IV	NO;NO;NO;NO;NO	Chemotherapy;Chemotherapy;Chemotherapy;Chemotherapy;Chemotherapy	Not Available;Not Available;Not Available;Not Available;Not Available	372;690;702;1260;3600	mg;mg;mg;mg;mg	Not Available;Not Available;Not Available;Not Available;Not Available	2009;2009;2009;2009;2009	Not Available	NOT HISPANIC OR LATINO	TCGA-61-2008-F28334	f45f3fe2-1f97-4e6f-afc7-d3abf0f3311a
TCGA-23-1024	FEMALE	468	Serous Cystadenocarcinoma	Ovary	Alive	Stage IV	G3	0	468			TUMOR FREE		52	Right	TCGA-23-1024	8ac6ce06-ab50-4ab4-a469-9f8bf01be963	24	-19052	Not Applicable	0	468	TCGA-23-1024-D25607;TCGA-23-1024-D25606;TCGA-23-1024-D25605;TCGA-23-1024-D25608	39c2c36e-c470-48f1-82a2-9f358d3e5957;0a45720d-954b-4382-b052-f73401d543ce;ad2ca791-17ad-4489-b546-ffff653fff09;4aa79340-215b-4e20-98be-676cd4c8f2e8	Not Available;Not Available;Not Available;Not Available	27;27;27;27	304;304;529;304	13;13;224;13	Cisplatin;Paclitaxel;Paclitaxel;Carboplatin	Not Available;Not Available;Not Available;Not Available	3;3;3;3	6;6;12;6	Not Available;Not Available;Not Available;Not Available	mg;mg;mg;mg	ADJUVANT;ADJUVANT;OTHER, SPECIFY IN NOTES;ADJUVANT	Not Applicable;Not Applicable;Consolidation;Not Applicable	Not Available;Not Available;Not Available;Not Available	IP;IP;IV;IP	NO;NO;NO;NO	Chemotherapy;Chemotherapy;Chemotherapy;Chemotherapy	Not Available;Not Available;Not Available;Not Available	776;1608;2556;541	mg;mg;mg;mg	Not Available;Not Available;Not Available;Not Available	2009;2009;2009;2009	Not Available	NOT HISPANIC OR LATINO	TCGA-23-1024-F25604	3e1241b4-c16c-4299-b793-b22309184b85
TCGA-13-1481	FEMALE	2648	Serous Cystadenocarcinoma	Ovary	Dead	Stage IIIC	G2	0	2648			TUMOR FREE		76	Right	TCGA-13-1481	c5355491-e1e8-46a4-a05e-bafcaf2e7459	31	-27898	2648	0	2648	TCGA-13-1481-D24846;TCGA-13-1481-D24844;TCGA-13-1481-D24845	f88e48af-f598-4236-bf59-a343851c2d7c;82353d99-0371-47d6-90a3-c012f8fad803;799031c3-47c1-4f36-a30d-e518b4c11298	Not Available;Not Available;Not Available	30;30;30	242;131;131	198;11;11	Cisplatin;Paciltaxel;Carboplatin	Not Available;Not Available;Not Available	6;6;6	3;6;6	Not Available;Not Available;Not Available	Not Available;mg/m2;Not Available	ADJUVANT;ADJUVANT;ADJUVANT	Not Applicable;Not Applicable;Not Applicable	Not Available;Not Available;Not Available	IP;IV;IV	NO;NO;NO	Chemotherapy;Chemotherapy;Chemotherapy	Not Available;Not Available;Not Available	Not Available;175;5	Not Available;mg/m2;Not Available	Not Available;Not Available;Not Available	2009;2009;2009	Not Available	NOT HISPANIC OR LATINO	TCGA-13-1481-F24843	ad6484b6-fb62-4ffe-a5f7-0728b7654d8e
TCGA-24-1923	FEMALE	690	Serous Cystadenocarcinoma	Ovary	Dead	Stage IIIC	G3	1	343		Recurrence	WITH TUMOR		51	Bilateral	TCGA-24-1923	8449955f-42d9-46f6-919a-5cc5d59e6284	19	-18628	690	0	690	TCGA-24-1923-D26380;TCGA-24-1923-D26383;TCGA-24-1923-D26381;TCGA-24-1923-D26382;TCGA-24-1923-D26384	6472b85a-ce8f-4dd6-b255-8d215538af3f;dd656b25-2f04-4167-937f-f3d8b4434a9c;ea59cc77-d039-49f3-9ebc-8a903228c266;8c315697-557b-4e11-9d30-223d743a4782;aa10be72-fe56-4ef3-9a71-3abf202da29c	Not Available;Not Available;Not Available;Not Available;Not Available	19;19;19;19;4	233;Not Available;233;233;Not Available	35;383;35;35;Not Available	carboplatin;Topotecan;Taxol;Doxil;GOG182	Not Available;Not Available;Not Available;Not Available;Not Available	2;2;2;2;6	08;Not Available;3;4;Not Available	Not Available;Not Available;Not Available;Not Available;Not Available	Not Available;Not Available;Not Available;Not Available;Not Available	ADJUVANT;RECURRENCE;ADJUVANT;ADJUVANT;ADJUVANT	Not Applicable;Not Applicable;Not Applicable;Not Applicable;Not Applicable	Not Available;Not Available;Not Available;Not Available;Not Available	IV;IV;IV;IV;Not Available	NO;NO;NO;NO;Not Available	Chemotherapy;Chemotherapy;Chemotherapy;Chemotherapy;Chemotherapy	Not Available;Not Available;Not Available;Not Available;Not Available	Not Available;Not Available;Not Available;Not Available;Not Available	Not Available;Not Available;Not Available;Not Available;Not Available	Not Available;Not Available;Not Available;Not Available;Not Available	2010;2010;2010;2010;2010	Not Available	Not Available	TCGA-24-1923-F26379	a490cc6b-d715-4c9e-8039-8508af334257
TCGA-24-1545	FEMALE	1746	Serous Cystadenocarcinoma	Ovary	Dead	Stage IIIC	G3	1	861		Recurrence	WITH TUMOR		69	Bilateral	TCGA-24-1545	f2ec64f5-a414-4c34-99c7-d59bc4e831e0	2	-25460	1746	0	1746	TCGA-24-1545-D26089;TCGA-24-1545-D26093;TCGA-24-1545-D26094;TCGA-24-1545-D26091;TCGA-24-1545-D26090;TCGA-24-1545-D26092;TCGA-24-1545-D26095	55f6d8ae-116b-4664-9b7c-dbdb2cccac10;e4f6dcef-e36c-4d69-973e-66292bb6d9c3;7eae83cf-f8b8-4002-aaa2-c10132f7fdf4;bca3bc2d-ed36-41e0-afc3-d899ba451903;63fb1c9b-e07e-4a55-a88e-be3534fd87fc;47004f32-ba26-4d9c-be14-611ebf3f5dd9;f2c12ae2-10b5-4066-b8c4-2538743a8fff	Not Available;Not Available;Not Available;Not Available;Not Available;Not Available;Not Available	27;27;27;27;27;27;27	285;1169;1169;951;285;1028;1238	14;1056;1056;867;14;973;1203	Taxol;Taxol;Carboplatin;Topotecan;Carboplatin;Doxil;Navelbine	Not Available;Not Available;Not Available;Not Available;Not Available;Not Available;Not Available	7;7;7;7;7;7;7	10;06;06;05;10;03;02	Not Available;Not Available;Not Available;Not Available;Not Available;Not Available;Not Available	mg;mg;mg;mg;mg;mg;mg	ADJUVANT;PROGRESSION;PROGRESSION;RECURRENCE;ADJUVANT;PROGRESSION;PROGRESSION	Not Applicable;Not Applicable;Not Applicable;Not Applicable;Not Applicable;Not Applicable;Not Applicable	Not Available;Not Available;Not Available;Not Available;Not Available;Not Available;Not Available	IV;IV;IV;IV;IV;IV;IV	NO;NO;NO;NO;NO;NO;NO	Chemotherapy;Chemotherapy;Chemotherapy;Chemotherapy;Chemotherapy;Chemotherapy;Chemotherapy	Not Available;Not Available;Not Available;Not Available;Not Available;Not Available;Not Available	2520;1476;3068;42;5750;165;215	mg;mg;mg;mg;mg;mg;mg	Not Available;Not Available;Not Available;Not Available;Not Available;Not Available;Not Available	2009;2009;2009;2009;2009;2009;2009	0	Not Available	TCGA-24-1545-F26088	84f70a51-070e-4649-8a9e-df72b6b5e095
TCGA-24-1104	FEMALE	1933	Serous Cystadenocarcinoma	Ovary	Dead	Stage IV	G3	1	959		Recurrence	WITH TUMOR		56	Left	TCGA-24-1104	f9f44f86-10c7-4473-b156-5afbfa9a2ad0	9	-20527	1933	0	1933	TCGA-24-1104-D25836;TCGA-24-1104-D25837;TCGA-24-1104-D25835;TCGA-24-1104-D25838;TCGA-24-1104-D25839;TCGA-24-1104-D25840;TCGA-24-1104-D25841	e9de231f-ab26-4ed6-af61-fa3e6e1173f7;b446a898-1eae-4f20-88d0-55fafab04fa8;49a7aa0b-ee9a-451f-bbc4-1b6de517ec0e;d48553ab-2f2b-4708-8d43-fdd995fa330c;3bcc4b9b-c529-4706-845d-5c82f0e81e9a;3a12c164-e3cd-4312-ba87-6320222e0dbc;8d708e6e-b456-4878-9446-dad3734222aa	Not Available;Not Available;Not Available;Not Available;Not Available;Not Available;Not Available	9;9;9;27;1;1;1	1589;175;175;175;1113;1113;1876	1526;30;30;30;1001;1001;1858	Doxil;Cisplatin;Paclitaxel;Carboplatin;Taxol;Carboplatin;Taxol	Not Available;Not Available;Not Available;Not Available;Not Available;Not Available;Not Available	3;3;3;3;2;2;2	3;6;6;6;6;6;2	Not Available;Not Available;Not Available;Not Available;Not Available;Not Available;Not Available	mg;mg;mg;mg;mg;mg;mg	RECURRENCE;ADJUVANT;ADJUVANT;ADJUVANT;RECURRENCE;RECURRENCE;RECURRENCE	Not Applicable;Not Applicable;Not Applicable;Not Applicable;Not Applicable;Not Applicable;Not Applicable	Not Available;Not Available;Not Available;Not Available;Not Available;Not Available;Not Available	IV;IV;IV;IV;IV;IV;IV	NO;NO;NO;NO;NO;NO;NO	Chemotherapy;Chemotherapy;Chemotherapy;Chemotherapy;Chemotherapy;Chemotherapy;Chemotherapy	Not Available;Not Available;Not Available;Not Available;Not Available;Not Available;Not Available	190;250;1518;2007;1800;402;438	mg;mg;mg;mg;mg;mg;mg	Not Available;Not Available;Not Available;Not Available;Not Available;Not Available;Not Available	2009;2009;2009;2009;2010;2010;2010	Not Available	Not Available	TCGA-24-1104-F25834	e919193f-c3a5-4dc0-b6ce-3c6d7f1a727e
TCGA-24-2293	FEMALE	506	Serous Cystadenocarcinoma	Omentum	Dead		G3	0	506			Not Available		47	Right	TCGA-24-2293	bdd792e7-d75f-4aa3-b38e-f0708e112075	26	-17235	506	0	506	TCGA-24-2293-D26599;TCGA-24-2293-D26600;TCGA-24-2293-D26602;TCGA-24-2293-D26603;TCGA-24-2293-D26601	259222b7-aa56-4b27-b5c1-a167efcc5a05;478b2750-e834-4ab0-9745-79e4791c52ea;c370ef42-66a2-4812-a7b2-c1a6cfdf941d;a3d3ee41-2df1-443f-afc8-12b8d71bb04f;8050a129-6bfa-4037-8fe8-a5b254002a76	Not Available;Not Available;Not Available;Not Available;Not Available	26;26;26;26;26	Not Available;Not Available;Not Available;Not Available;Not Available	Not Available;Not Available;Not Available;Not Available;Not Available	Carboplatin;Taxol;Etoposide;Carboplatin;Melphalan	Not Available;Not Available;Not Available;Not Available;Not Available	2;2;2;2;2	06;06;Not Available;Not Available;Not Available	Not Available;Not Available;Not Available;Not Available;Not Available	Not Available;Not Available;Not Available;Not Available;Not Available	ADJUVANT;ADJUVANT;ADJUVANT;ADJUVANT;ADJUVANT	Not Applicable;Not Applicable;Not Applicable;Not Applicable;Not Applicable	Not Available;Not Available;Not Available;Not Available;Not Available	IV;IV;IV;IV;IV	NO;NO;NO;NO;NO	Chemotherapy;Chemotherapy;Chemotherapy;Chemotherapy;Chemotherapy	Not Available;Not Available;Not Available;Not Available;Not Available	Not Available;Not Available;Not Available;Not Available;Not Available	Not Available;Not Available;Not Available;Not Available;Not Available	Not Available;Not Available;Not Available;Not Available;Not Available	2010;2010;2010;2010;2010	Not Available	Not Available	TCGA-24-2293-F26598	65ef94b1-f432-43af-b82b-79eda4ec62be
TCGA-29-1692	FEMALE	2872	Serous Cystadenocarcinoma	Ovary	Dead	Stage IIIC	G2	1	544		Recurrence	WITH TUMOR		58	Right	TCGA-29-1692	92960f76-0242-4a1c-bf7d-014c2f720219	2	-21193	2872	0	2872	TCGA-29-1692-D27161;TCGA-29-1692-D27166;TCGA-29-1692-D27163;TCGA-29-1692-D27171;TCGA-29-1692-D27168;TCGA-29-1692-D27165;TCGA-29-1692-D27169;TCGA-29-1692-D27164;TCGA-29-1692-D27170;TCGA-29-1692-D27172;TCGA-29-1692-D27160;TCGA-29-1692-D27167;TCGA-29-1692-D27162	685c255e-2242-435e-b5d3-229453699a04;2438d130-a7cc-471c-8770-e9cab1a2f523;90600159-513c-457a-9f29-036530819aea;5190da4a-540d-4dd0-bf50-a58711ff9aea;f32e96f4-6144-4ed9-be21-ae2a8f6c0b8a;6a477a8e-e65c-467e-a25d-caae5486b693;92bc26a1-5bab-4fd2-858c-6f31f45e04e2;2917d0e8-ad7f-4643-8b76-7d5a97ff304d;642fd6be-d54d-4093-bfe4-f2a4bf2f939c;0ab57961-2afb-4492-b67e-51bdc6130ea7;5949a274-8f5b-4410-89b4-3d629…	Not Available;Not Available;Not Available;Not Available;Not Available;Not Available;Not Available;Not Available;Not Available;Not Available;Not Available;Not Available;Not Available	3;3;3;3;3;3;3;3;3;3;3;3;3	Not Available;2247;Not Available;2785;2521;Not Available;2577;694;2785;2125;Not Available;2247;Not Available	5;2120;544;2616;2278;1548;2556;Not Available;2616;1793;5;2120;544	Cisplatin;Carboplatin;Paclitaxel;Cisplatin;Cytoxan;Doxil;Paclitaxel;Topotecan;Gemcitabine;Tamoxifen;Taxol;Taxotere;Carboplatin	Not Available;Not Available;Not Available;Not Available;Not Available;Not Available;Not Available;Not Available;Not Available;Not Available;Not Available;Not Available;Not Available	3;3;3;3;3;3;3;3;3;3;3;3;3	03;06;Not Available;06;Not Available;08;02;Not Available;06;Not Available;03;06;Not Available	Not Available;Not Available;Not Available;Not Available;Not Available;Not Available;Not Available;Not Available;Not Available;Not Available;Not Available;Not Available;Not Available	AUC;Not Available;Not Available;mg;Not Available;Not Available;mg;Not Available;mg;mg;mg/m2;Not Available;Not Available	ADJUVANT;PROGRESSION;RECURRENCE;PROGRESSION;PROGRESSION;PROGRESSION;PROGRESSION;PROGRESSION;PROGRESSION;PROGRESSION;ADJUVANT;PROGRESSION;RECURRENCE	Not Applicable;Not Applicable;Not Applicable;Not Applicable;Not Applicable;Not Applicable;Not Applicable;Not Applicable;Not Applicable;Not Applicable;Not Applicable;Not Applicable;Not Applicable	Not Available;Not Available;Not Available;Not Available;Not Available;Not Available;Not Available;Not Available;Not Available;Not Available;Not Available;Not Available;Not Available	IV;IV;IP;IV;IV;IV;IV;IV;IV;IV;Not Available;IV;IV;IP;IV	NO;NO;NO;NO;NO;NO;NO;NO;NO;NO;NO;NO;NO	Chemotherapy;Chemotherapy;Chemotherapy;Chemotherapy;Chemotherapy;Chemotherapy;Chemotherapy;Chemotherapy;Chemotherapy;Hormone Therapy;Chemotherapy;Chemotherapy;Chemotherapy	Not Available;Not Available;Not Available;Not Available;Not Available;Not Available;Not Available;Not Available;Not Available;Not Available;Not Available;Not Available;Not Available	7;Not Available;Not Available;45;Not Available;Not Available;289;Not Available;1250;20;175;Not Available;Not Available	AUC;Not Available;Not Available;mg;Not Available;Not Available;mg;Not Available;mg;mg;mg/m2;Not Available;Not Available	Not Available;Not Available;Not Available;Not Available;Not Available;Not Available;Not Available;Not Available;Not Available;Not Available;Not Available;Not Available;Not Available	2010;2010;2010;2010;2010;2010;2010;2010;2010;2010;2010;2010;2010	0	Not Available	TCGA-29-1692-F27159	72f049e4-e0cc-44e8-9f54-5ba8e0acc565
TCGA-09-2055	FEMALE	819	Serous Cystadenocarcinoma	Ovary	Alive	Stage IC	G3	0	819			TUMOR FREE		48	Left	TCGA-09-2055	838778c3-0b33-4fc5-97fc-5da163475485	2	-17545	Not Applicable	0	819	TCGA-09-2055-D24397;TCGA-09-2055-D24396	49441fe6-198e-43c3-ba65-b1575d1075ab;71b4da94-56ba-47a7-9cbe-e33ec42f2095	Not Available;Not Available	2;2	189;189	5;5	Taxol;Carboplatin	Not Available;Not Available	11;11	6;6	Not Available;Not Available	mg/m2;Not Available	ADJUVANT;ADJUVANT	Not Applicable;Not Applicable	Not Available;Not Available	IV;IV	NO;NO	Chemotherapy;Chemotherapy	Not Available;Not Available	175;Not Available	mg/m2;Not Available	Not Available;Not Available	2009;2009	Not Available	NOT HISPANIC OR LATINO	TCGA-09-2055-F24395	fac2d6fc-13cf-49fc-9201-6997dd4cb7a0
TCGA-23-1122	FEMALE	1189	Serous Cystadenocarcinoma	Ovary	Dead	Stage IIIC	G3	1	447		Recurrence	WITH TUMOR		53	Left	TCGA-23-1122	d2c0d320-d1c5-4eed-af4f-15540e60db0b	19	-19537	1189	0	Not Available	TCGA-23-1122-D25729;TCGA-23-1122-D25730;TCGA-23-1122-D25726;TCGA-23-1122-D25725;TCGA-23-1122-D25727;TCGA-23-1122-D25728	75bcf34f-515a-4ada-aca8-b0e8548a4a67;5b6a82d6-b750-44e9-b52f-c8ce5cd84a75;9be1fb51-4bb5-4ad9-8bdd-d26152e731aa;948c7d43-3dbd-4e69-b81b-ba635e818523;5490f2a7-3eb4-4529-b556-001c0b298aaf;d4bbd55b-fc97-42f6-bb91-518b51ae30d0	Not Available;Not Available;Not Available;Not Available;Not Available;Not Available	27;27;27;27;27;27	1031;1089;686;244;754;859	921;1054;501;27;707;775	Ifosfamide;Cisplatin;Gemcitabine;Carboplatin;Gemzar;Gemcitabine	Not Available;Not Available;Not Available;Not Available;Not Available;Not Available	3;3;3;3;3;3	6;6;20;8;5;9	Not Available;Not Available;Not Available;Not Available;Not Available;Not Available	mg;mg;mg;mg;mg;mg	OTHER, SPECIFY IN NOTES;OTHER, SPECIFY IN NOTES;RECURRENCE;ADJUVANT;RECURRENCE;OTHER, SPECIFY IN NOTES	Persistence;Persistence;Not Applicable;Not Applicable;Not Applicable;"Persistence"	Not Available;Not Available;Not Available;Not Available;Not Available;Not Available	IV;IV;IV;IV;IV;IV	NO;NO;NO;NO;NO;NO	Chemotherapy;Chemotherapy;Chemotherapy;Chemotherapy;Chemotherapy;Chemotherapy	Not Available;Not Available;Not Available;Not Available;Not Available;Not Available	72;240;15900;4200;3500;5900	mg;mg;mg;mg;mg;mg	Not Available;Not Available;Not Available;Not Available;Not Available;Not Available	2009;2009;2009;2009;2009;2009	Not Available	Not Available	TCGA-23-1122-F25724	835873b9-9590-4af3-b5ac-33688f902940
TCGA-61-2094	FEMALE	2182	Serous Cystadenocarcinoma	Ovary	Alive	Stage IIIC	G3	0	2182			TUMOR FREE		63	Bilateral	TCGA-61-2094	b31d85cc-d2e2-4bd1-9986-d6bbe30e657f	8	-23273	Not Applicable	0	2182	TCGA-61-2094-D28387;TCGA-61-2094-D28386	8ca7bbee-0d63-40d2-b769-73f7e9411a50;384a2e6a-6501-479e-b41c-10713af19c13	Not Available;Not Available	8;8	166;166	24;24	Carboplatin;Taxol	Not Available;Not Available	12;12	06;06	Not Available;Not Available	Not Available;Not Available	ADJUVANT;ADJUVANT	Not Applicable;Not Applicable	Not Available;Not Available	Not Available;Not Available	NO;NO	Chemotherapy;Chemotherapy	Not Available;Not Available	Not Available;Not Available	Not Available;Not Available	Not Available;Not Available	2009;2009	Not Available	NOT HISPANIC OR LATINO	TCGA-61-2094-F28385	d6ca83f9-d13e-48c8-9739-0ddfe7467b49
TCGA-29-1696	FEMALE	1032	Serous Cystadenocarcinoma	Ovary	Dead	Stage IIIC	G2	1	342		Recurrence	WITH TUMOR		43	Right	TCGA-29-1696	8a98a6e6-b763-4824-858b-fd2738e6c9a3	2	-15818	1032	0	1025	TCGA-29-1696-D27207;TCGA-29-1696-D27208;TCGA-29-1696-D27211;TCGA-29-1696-D27213;TCGA-29-1696-D27210;TCGA-29-1696-D27214;TCGA-29-1696-D27212;TCGA-29-1696-D27209	5a0a45c1-c2b7-49f9-a424-cd55b46658ac;935ba94e-17b1-42bb-bfcb-777d7af0b574;74cef5fc-3be7-47ae-9823-b91fc4246b28;a99ed1d2-8b6d-4027-869a-87359a36904f;46c5e2a6-3891-4521-9859-437c416d0ad3;2391893d-dd51-43c2-b966-532867973538;02efd7a1-75d6-4e57-b6e6-9146747f5cc3;9b52668c-3ac3-46d0-824a-5e670e09207e	Not Available;Not Available;Not Available;Not Available;Not Available;Not Available;Not Available;Not Available	11;11;7;7;7;7;7;7	171;171;791;997;573;997;934;479	17;17;598;948;507;633;864;357	Paclitaxel;Carboplatin;Carboplatin;Cyclophosphamide;Gemcitabine;Bevacizumab;Paclitaxel;Doxorubicin HCL	Not Available;Not Available;Not Available;Not Available;Not Available;Not Available;Not Available;Not Available	12;12;4;4;4;4;4;4	08;08;10;02;03;Not Available;09;04	Not Available;Not Available;Not Available;Not Available;Not Available;Not Available;Not Available;Not Available	mg;mg;AUC;mg;mg;mg;mg;mg	ADJUVANT;ADJUVANT;PROGRESSION;PROGRESSION;PROGRESSION;PROGRESSION;PROGRESSION;PROGRESSION	Not Applicable;Not Applicable;Not Applicable;Not Applicable;Not Applicable;Not Applicable;Not Applicable;Not Applicable	Not Available;Not Available;Not Available;Not Available;Not Available;Not Available;Not Available;Not Available	IV;IV;IV;IV;IV;Not Available;IV;IV	NO;NO;NO;NO;NO;NO;NO;NO	Chemotherapy;Chemotherapy;Chemotherapy;Chemotherapy;Chemotherapy;Targeted Molecular therapy;Chemotherapy;Chemotherapy	Not Available;Not Available;Not Available;Not Available;Not Available;Not Available;Not Available;Not Available	2550;5472;6;1305;8321;660;140;70	mg;mg;AUC;mg;mg;mg;mg;mg	Not Available;Not Available;Not Available;Not Available;Not Available;Not Available;Not Available;Not Available	2009;2009;2010;2010;2010;2010;2010;2010	Not Available	Not Available	TCGA-29-1696-F27206	82bd749e-d9aa-4da7-bd7d-57255e9c7e2e
TCGA-59-2355	FEMALE	65	Serous Cystadenocarcinoma	Ovary	Dead	Stage IV	G3	0	65			WITH TUMOR		58	Right	TCGA-59-2355	708eec28-2348-4e15-b98c-8c6f9d057b1e	29	Not Available	65	0	Not Available	TCGA-59-2355-D28112;TCGA-59-2355-D28113	a484b2da-a6d7-403b-b76e-17312504bdbc;90eccdfc-050e-473d-854a-6bd75e253a13	Not Available;Not Available	31;31	Not Available;Not Available	Not Available;Not Available	Carboplatin;Taxol	Not Available;Not Available	3;3	Not Available;Not Available	Not Available;Not Available	Not Available;Not Available	ADJUVANT;ADJUVANT	Not Applicable;Not Applicable	Not Available;Not Available	Not Available;Not Available	Not Available;Not Available	Chemotherapy;Chemotherapy	Not Available;Not Available	Not Available;Not Available	Not Available;Not Available	Not Available;Not Available	2010;2010	Not Available	NOT HISPANIC OR LATINO	TCGA-59-2355-F28111	395e39dd-fe65-4c7c-ae0d-6065c0217d5f
TCGA-24-1466	FEMALE	1373	Serous Cystadenocarcinoma	Ovary	Dead	Stage IIIC	G3	1	491		Recurrence	WITH TUMOR		74	Bilateral	TCGA-24-1466	098acb76-0bf5-44e5-bcae-f919cf5fa5e5	17	-27307	1373	0	1373	TCGA-24-1466-D26032;TCGA-24-1466-D26035;TCGA-24-1466-D26033;TCGA-24-1466-D26030;TCGA-24-1466-D26036;TCGA-24-1466-D26029;TCGA-24-1466-D26031;TCGA-24-1466-D26037;TCGA-24-1466-D26034	95c8c713-2e46-4b1f-ba01-0327f5df424f;7a193f01-5589-49f8-affe-87258ba73206;f173fa84-796d-4b1c-a328-63bc667ded63;c6e44e2b-090b-4e55-bdde-6b44e3a1f501;d560fa78-e2e9-4912-a9de-fefea60898f4;e6de86e0-4434-4398-93ab-507903ddf2e5;565fb3ee-a4c7-4150-a80f-4b2abfcc9bc0;60fd442d-0cea-4420-beb7-74230f801921;da59a6a9-6e33-407b-aaca-6d930603d936	Not Available;Not Available;Not Available;Not Available;Not Available;Not Available;Not Available;Not Available;Not Available	17;17;17;17;17;17;17;17;17	680;1216;1020;145;852;145;680;Not Available;1020	483;1081;880;12;670;12;483;1227;880	Carboplatin;Topetecan;Carboplatin;Taxol;Tamoxifen;Carboplatin;Taxol;Tamoxifen;Taxol	Not Available;Not Available;Not Available;Not Available;Not Available;Not Available;Not Available;Not Available;Not Available	4;4;4;4;4;4;4;4;4	7;6;6;6;Not Available;6;7;Not Available;06	Not Available;Not Available;Not Available;Not Available;Not Available;Not Available;Not Available;Not Available;Not Available	mg;mg;mg;mg;mg/day;mg;mg;Not Available;mg	RECURRENCE;PROGRESSION;PROGRESSION;ADJUVANT;RECURRENCE;ADJUVANT;RECURRENCE;PROGRESSION;PROGRESSION	Not Applicable;Not Applicable;Not Applicable;Not Applicable;Not Applicable;Not Applicable;Not Applicable;Not Applicable;Not Applicable	Not Available;Not Available;Not Available;Not Available;Not Available;Not Available;Not Available;Not Available;Not Available	IV;IV;IV;IV;PO;IV;IV;PO;IV	NO;NO;NO;NO;NO;NO;NO;Not Available;NO	Chemotherapy;Chemotherapy;Chemotherapy;Chemotherapy;Hormone Therapy;Chemotherapy;Chemotherapy;Hormone Therapy;Chemotherapy	Not Available;Not Available;Not Available;Not Available;Not Available;Not Available;Not Available;Not Available;Not Available	3820;57.6;3110;1715;20;3502;1904;Not Available;1564	mg;mg;mg;mg;mg/day;mg;mg;Not Available;mg	Not Available;Not Available;Not Available;Not Available;Not Available;Not Available;Not Available;Not Available;Not Available	2009;2009;2009;2009;2009;2009;2009;2009;2009	Not Available	Not Available	TCGA-24-1466-F26028	d74104a4-dfb4-4dfc-b627-ff418aba20ec
TCGA-23-2641	FEMALE	84	Serous Cystadenocarcinoma	Ovary	Alive	Stage IIIC	G3	0	84			Not Available		85	Left	TCGA-23-2641	49e5ee61-a1c9-4038-84ac-92683e573a65	9	-31232	Not Applicable	0	84																								Not Available	NOT HISPANIC OR LATINO	TCGA-23-2641-F25810	a0a46d22-1029-40b7-b01c-a0d2322c130b
TCGA-61-1728	FEMALE	848	Serous Cystadenocarcinoma	Ovary	Alive	Stage IV	G3	1	533		Recurrence	TUMOR FREE		59	Bilateral	TCGA-61-1728	07fbdb3c-8337-4319-8255-f2363f8a031e	2	-21582	Not Applicable	0	848	TCGA-61-1728-D28158;TCGA-61-1728-D28157;TCGA-61-1728-D28159	f040590a-48e8-4891-9aff-f2534f18ff54;f38cdfc3-7031-4308-ad4e-4dc2ee43c0d7;c225c5ce-5c01-4ae5-b74f-a6e2034824bf	Not Available;Not Available;Not Available	30;30;30	204;848;204	43;246;43	Carboplatin;SNS 595;Taxol	Not Available;Not Available;Not Available	11;11;11	08;20;08	Not Available;Not Available;Not Available	mg;mg;mg	ADJUVANT;RECURRENCE;ADJUVANT	Not Applicable;Not Applicable;Not Applicable	Not Available;Not Available;Not Available	IV;IV;IV	NO;NO;NO	Chemotherapy;Chemotherapy;Chemotherapy	Not Available;Not Available;Not Available	5280;1920;2000	mg;mg;mg	Not Available;Not Available;Not Available	2009;2009;2009	Not Available	NOT HISPANIC OR LATINO	TCGA-61-1728-F28156	16d97d30-b99b-4b12-9913-cf03f002008d
TCGA-13-0801	FEMALE	1399	Serous Cystadenocarcinoma	Ovary	Dead	Stage IIIC	G3	1	345			TUMOR FREE		46	Bilateral	TCGA-13-0801	b8c3d99c-429b-42a3-b486-6fbcb90cc2e0	25	-16812	Not Applicable	0	252	TCGA-13-0801-D24622;TCGA-13-0801-D24623;TCGA-13-0801-D24621	48845041-4684-4ce0-afb3-b87310cdec68;bb31a332-a1a0-4581-9d52-56985e1e12bc;15a73dea-bc43-4bd4-94be-918dc9428c2e	Not Available;Not Available;Not Available	15;15;15	144;144;144	32;32;32	Paclitaxel;Paclitaxel;Cisplatin	Not Available;Not Available;Not Available	4;4;4	6;6;6	Not Available;Not Available;Not Available	mg/m2;mg/m2;mg/m2	ADJUVANT;ADJUVANT;ADJUVANT	Not Applicable;Not Applicable;Not Applicable	Not Available;Not Available;Not Available	IV;IP;IP	NO;NO;NO	Chemotherapy;Chemotherapy;Chemotherapy	Not Available;Not Available;Not Available	Not Available;Not Available;Not Available	mg/m2;mg/m2;mg/m2	Not Available;Not Available;Not Available	2009;2009;2009	Not Available	NOT HISPANIC OR LATINO	TCGA-13-0801-F24620;TCGA-13-0801-F72613	7198f423-8333-4349-8ee6-65e5a4322771;1AA9E1EA-9306-4C42-9690-64AFD2D3977C
TCGA-31-1953	FEMALE	204	Serous Cystadenocarcinoma	Ovary	Alive	Stage IIIC	G3	1	70		Recurrence	WITH TUMOR		52	Bilateral	TCGA-31-1953	61feee94-3ac9-42fe-aaa3-dc6a3efe563c	20	-19064	Not Applicable	0	204	TCGA-31-1953-D27700;TCGA-31-1953-D27702;TCGA-31-1953-D27701;TCGA-31-1953-D27699	ece15379-890e-4d24-8c23-a9bd4dcd8e46;eb1db586-968a-445e-87e4-81609c8cc5e2;c46dae01-314c-4890-b522-e1446a0f2223;87f2114d-3ed1-418a-b563-c4a1efdd6c0f	Not Available;Not Available;Not Available;Not Available	20;20;20;20	65;Not Available;Not Available;65	23;100;100;23	Paciltaxel;Paciltaxle;Carboplatin;Carboplatin	Not Available;Not Available;Not Available;Not Available	10;10;10;10	03;Not Available;Not Available;03	Not Available;Not Available;Not Available;Not Available	mg;Not Available;Not Available;mg	ADJUVANT;PROGRESSION;PROGRESSION;ADJUVANT	Not Applicable;Not Applicable;Not Applicable;Not Applicable	Not Available;Not Available;Not Available;Not Available	IV;IV;IV;IV	NO;YES;YES;NO	Chemotherapy;Chemotherapy;Chemotherapy;Chemotherapy	Not Available;Not Available;Not Available;Not Available	840;Not Available;Not Available;1350	mg;Not Available;Not Available;mg	Not Available;Not Available;Not Available;Not Available	2009;2009;2009;2009	1	NOT HISPANIC OR LATINO	TCGA-31-1953-F27698	0b48f22b-fc99-4647-bd44-0e2a250c6d91
TCGA-13-1492	FEMALE	3819	Serous Cystadenocarcinoma	Ovary	Dead	Stage IIIC	G3	0	3819			TUMOR FREE		66	Not Available	TCGA-13-1492	63c6a89b-b28c-434a-a632-5de6545db731	31	-24332	Not Applicable	0	2237	TCGA-13-1492-D24890;TCGA-13-1492-D24891	6f3448eb-dbbd-49e5-9a02-7d5951b8c588;c73b40ca-5b10-47a1-ac49-e4dd24db1e05	Not Available;Not Available	30;30	247;247	48;48	Carboplatin;Paclitaxel	Not Available;Not Available	6;6	7;7	Not Available;Not Available	Not Available;mg/m2	ADJUVANT;ADJUVANT	Not Applicable;Not Applicable	Not Available;Not Available	IV;IV	NO;NO	Chemotherapy;Chemotherapy	Not Available;Not Available	5;175	Not Available;mg/m2	Not Available;Not Available	2009;2009	Not Available	NOT HISPANIC OR LATINO	TCGA-13-1492-F24889;TCGA-13-1492-F72643	62de4389-6bb4-42ff-84a9-3ab406e99c05;6A1E8C87-4A30-44E4-8289-0F4F8C092A75
TCGA-36-2544	FEMALE	638	Serous Cystadenocarcinoma	Ovary	Alive	Stage IIIC	G3	1	325		Progression of Disease	WITH TUMOR		58	Bilateral	TCGA-36-2544	da56dfbe-35ae-4bd7-9a11-d9bbb02b1833	18	-21384	Not Applicable	0	638	TCGA-36-2544-D27950;TCGA-36-2544-D27949;TCGA-36-2544-D27951;TCGA-36-2544-D27952	f7dd65b4-7325-4b8e-a966-a1d861d1b258;d7582250-4e83-4f98-9c7e-db0b477604b2;1aab2bea-e290-440c-af43-f14733a32813;cf3913cd-287d-4a0c-a040-c13ae4ef276f	Not Available;Not Available;Not Available;Not Available	18;18;18;18	128;128;343;343	23;23;343;343	Paclitaxel;Carboplatin;Carboplatin;Paclitaxel	Not Available;Not Available;Not Available;Not Available	8;8;8;8	06;06;01;01	247;546;605;260	mg;mg;mg;mg	ADJUVANT;ADJUVANT;PROGRESSION;PROGRESSION	Not Applicable;Not Applicable;Not Applicable;Not Applicable	Not Available;Not Available;Not Available;Not Available	IV;IV;IV;IV	NO;NO;NO;NO	Chemotherapy;Chemotherapy;Chemotherapy;Chemotherapy	Not Available;Not Available;Not Available;Not Available	1542;3276;605;260	mg;mg;mg;mg	Not Available;Not Available;Not Available;Not Available	2010;2010;2010;2010	Not Available	Not Available	TCGA-36-2544-F27948	6cf6fd0d-3d0c-496a-a035-dfc94ed68911
TCGA-24-1425	FEMALE	181	Serous Cystadenocarcinoma	Ovary	Alive	Stage IIIC	G3	0	181			TUMOR FREE		45	Bilateral	TCGA-24-1425	b120b701-c194-43d7-a491-3206fac38ec1	12	-16764	Not Applicable	0	181	TCGA-24-1425-D25947;TCGA-24-1425-D25948;TCGA-24-1425-D25949	def339b3-1e0a-4329-aaae-7a397dcd76a1;4e000e93-7c9c-430e-803d-b235fa58d076;96ca010b-3b93-4206-8972-2599cf9895cd	Not Available;Not Available;Not Available	12;12;12	145;145;145	27;27;27	Taxotere;Carboplatin;Taxol	Not Available;Not Available;Not Available	5;5;5	06;06;06	Not Available;Not Available;Not Available	mg;mg;mg	ADJUVANT;ADJUVANT;ADJUVANT	Not Applicable;Not Applicable;Not Applicable	Not Available;Not Available;Not Available	IP;IV;IP;IV;IP;IV	NO;NO;NO	Chemotherapy;Chemotherapy;Chemotherapy	Not Available;Not Available;Not Available	832;5065;553	mg;mg;mg	Not Available;Not Available;Not Available	2009;2009;2009	0	Not Available	TCGA-24-1425-F25946	4a3aabd7-413a-42fe-a1dd-5af7e3935ec3
TCGA-13-0802	FEMALE	1552	Serous Cystadenocarcinoma	Ovary	Dead	Stage IIIC	G3	1	510			TUMOR FREE		79	Bilateral	TCGA-13-0802	3c8b5986-f9d5-4e7e-9dd4-3ad301451279	25	-29075	Not Applicable	0	249	TCGA-13-0802-D24626;TCGA-13-0802-D24627	98c08254-9631-499e-b215-5c9c32eb8009;6327fc62-9594-4666-83cc-db0aed29baed	Not Available;Not Available	15;15	188;188	62;62	Carboplatin;Paclitaxel	Not Available;Not Available	4;4	6;6	Not Available;Not Available	Not Available;mg/m2	ADJUVANT;ADJUVANT	Not Applicable;Not Applicable	Not Available;Not Available	IV;IV	NO;NO	Chemotherapy;Chemotherapy	Not Available;Not Available	Not Available;Not Available	Not Available;mg/m2	Not Available;Not Available	2009;2009	Not Available	NOT HISPANIC OR LATINO	TCGA-13-0802-F24625;TCGA-13-0802-F72615	7d5cd3ae-c5d9-45a0-9372-c0cec72673e1;E5BF7B40-DC66-4D58-8072-2FAB2CEDE9CB
TCGA-04-1350	FEMALE	1946	Serous Cystadenocarcinoma	Ovary	Dead	Stage IIIC	G3	1	111		Recurrence	WITH TUMOR		46	Bilateral	TCGA-04-1350	0f4a4ad1-e394-45c4-9aa9-aadf2bff0628	26	-16942	1946	0	Not Available	TCGA-04-1350-D23996;TCGA-04-1350-D23992;TCGA-04-1350-D23991;TCGA-04-1350-D23998;TCGA-04-1350-D23994;TCGA-04-1350-D23997;TCGA-04-1350-D23989;TCGA-04-1350-D23990;TCGA-04-1350-D23999;TCGA-04-1350-D23993;TCGA-04-1350-D23995	c6ca377d-35fb-4558-a98e-6a2722f37fa1;b7cd073a-7ba3-48ec-8172-0a230b6c0f7a;196d7307-35f0-4476-80ac-ee00c4b5a305;3f2319b5-98cf-40ee-ada2-7bd9e041c3e3;25b6f90e-7d0b-493c-8353-1e83e32684ab;a5e9b1ee-6713-4f06-abd5-4450057f0ca5;d3bc267a-90d8-490c-ac82-32383c4ca950;823bb81f-7708-4a0f-b91f-02f8f375c263;cae5bb23-53c0-40bc-8bfc-d3541ebd7b2d;ce73824b-a2d9-4f29-9172-453c72baefa6;566e0b34-13c1-442d-853d-ec2a4…	Not Available;Not Available;Not Available;Not Available;Not Available;Not Available;Not Available;Not Available;Not Available;Not Available;Not Available	10;10;10;10;10;10;10;10;10;10;10	Not Available;Not Available;Not Available;Not Available;Not Available;Not Available;Not Available;Not Available;Not Available;Not Available;Not Available	1580;720;363;1726;1389;1622;216;216;1726;1389;1389	Tamoxifen;Gemcitibine;Cisplatin;Fuluestrant;Gemcitibine;Aromasin;Taxol;Carboplatin;Faslodex;Cisplatin;Avastin	Not Available;Not Available;Not Available;Not Available;Not Available;Not Available;Not Available;Not Available;Not Available;Not Available;Not Available	11;11;11;11;11;11;11;11;11;11;11	Not Available;Not Available;Not Available;Not Available;Not Available;Not Available;Not Available;Not Available;Not Available;Not Available;Not Available	Not Available;Not Available;Not Available;Not Available;Not Available;Not Available;Not Available;Not Available;Not Available;Not Available;Not Available	Not Available;Not Available;Not Available;Not Available;Not Available;Not Available;Not Available;Not Available;Not Available;Not Available;Not Available	PROGRESSION;PROGRESSION;PROGRESSION;PROGRESSION;PROGRESSION;PROGRESSION;PROGRESSION;PROGRESSION;PROGRESSION;PROGRESSION;PROGRESSION	Not Applicable;Not Applicable;Not Applicable;Not Applicable;Not Applicable;Not Applicable;Not Applicable;Not Applicable;Not Applicable;Not Applicable;Not Applicable	Not Available;Not Available;Not Available;Not Available;Not Available;Not Available;Not Available;Not Available;Not Available;Not Available;Not Available	Not Available;IV;IV;Not Available;IV;Not Available;IV;IV;Not Available;IV;Not Available	NO;NO;NO;NO;NO;NO;NO;NO;NO;NO;NO	Targeted Molecular therapy;Chemotherapy;Chemotherapy;Targeted Molecular therapy;Chemotherapy;Targeted Molecular therapy;Chemotherapy;Chemotherapy;Targeted Molecular therapy;Chemotherapy;Immunotherapy	Not Available;Not Available;Not Available;Not Available;Not Available;Not Available;Not Available;Not Available;Not Available;Not Available;Not Available	Not Available;Not Available;Not Available;Not Available;Not Available;Not Available;Not Available;Not Available;Not Available;Not Available;Not Available	Not Available;Not Available;Not Available;Not Available;Not Available;Not Available;Not Available;Not Available;Not Available;Not Available;Not Available	Not Available;Not Available;Not Available;Not Available;Not Available;Not Available;Not Available;Not Available;Not Available;Not Available;Not Available	2009;2009;2009;2009;2009;2009;2009;2009;2009;2009;2009	0	Not Available	TCGA-04-1350-F23988	7b044c52-3464-4207-bbec-d65b1cc081f0
TCGA-13-0755	FEMALE	76	Serous Cystadenocarcinoma	Ovary	Dead	Stage IV	G3	1	34		Progression of Disease	WITH TUMOR		75	Bilateral	TCGA-13-0755	2956e414-f167-438f-8747-a46fe0723622	24	-27438	76	0	76	TCGA-13-0755-D24532	b1fd19c5-0fce-4869-ae4b-9b46b4361b96	Not Available	17	41	19	Carboplatin	Not Available	4	2	Not Available	mg/m2	ADJUVANT	Not Applicable	Not Available	IV	Not Available	Chemotherapy	Not Available	230	mg/m2	Not Available	2009	Not Available	NOT HISPANIC OR LATINO	TCGA-13-0755-F24531	b113f83e-be11-460a-9ade-2f5c506930f9
TCGA-13-1817	FEMALE	1024	Serous Cystadenocarcinoma	Ovary	Dead	Stage IIIC	G3	1	541		Recurrence	WITH TUMOR		56	Bilateral	TCGA-13-1817	8ae56ffc-960c-46c2-bd6c-1dcff33875d0	2	-20771	1024	0	1024	TCGA-13-1817-D24977;TCGA-13-1817-D24975;TCGA-13-1817-D24976;TCGA-13-1817-D24980;TCGA-13-1817-D24978;TCGA-13-1817-D24979	5f052b46-08ee-4244-9beb-91a6f49b3fe1;46c68ad3-9918-4b43-af34-dcf1dc8b88bd;24256629-d9d5-4c58-9dc1-ca8ccdf4f19f;e8666c06-5d87-4aef-a92d-637aa94392bb;5a5172bf-f07f-4e34-980d-1413e248b8dc;3166878d-db0c-4d9b-a45a-9701c30fe271	Not Available;Not Available;Not Available;Not Available;Not Available;Not Available	1;1;1;8;8;8	318;122;122;902;594;594	210;7;7;706;552;552	Cisplatin;Carboplatin;Paclitaxel;Liposomal Doxorubicin;Carboplatin;Paclitaxel	Not Available;Not Available;Not Available;Not Available;Not Available;Not Available	3;3;3;3;3;3	05;06;06;08;03;03	75;Not Available;176;39;365;176	mg/m2;AUC;mg/m2;mg/m2;mg/m2;mg/m2	ADJUVANT;ADJUVANT;ADJUVANT;RECURRENCE;RECURRENCE;RECURRENCE	Not Applicable;Not Applicable;Not Applicable;Not Applicable;Not Applicable;Not Applicable	Not Available;Not Available;Not Available;Not Available;Not Available;Not Available	IP;IV;IV;IV;IV;IV	NO;NO;NO;NO;NO;NO	Chemotherapy;Chemotherapy;Chemotherapy;Chemotherapy;Chemotherapy;Chemotherapy	Not Available;Not Available;Not Available;Not Available;Not Available;Not Available	Not Available;5;Not Available;Not Available;Not Available;Not Available	mg/m2;AUC;mg/m2;mg/m2;mg/m2;mg/m2	Not Available;Not Available;Not Available;Not Available;Not Available;Not Available	2010;2010;2010;2010;2010;2010	Not Available	Not Available	TCGA-13-1817-F24974	1dd20852-7a1c-4a36-8d97-64b76e918a0a
TCGA-61-2003	FEMALE	122	Serous Cystadenocarcinoma	Ovary	Alive	Stage IIIC	G2	0	122			WITH TUMOR		53	Bilateral	TCGA-61-2003	33dc48d8-2e01-482b-944c-ac10da727ec9	8	-19605	Not Applicable	0	122	TCGA-61-2003-D28332;TCGA-61-2003-D28328;TCGA-61-2003-D28331;TCGA-61-2003-D28330;TCGA-61-2003-D28329	682e5459-eee9-47d4-aa3f-b5543a57a9c5;548a0b5e-a665-40db-864c-7a990f366c0d;c055893d-8966-4aca-8d83-54c687fa097f;08a1b811-658b-474d-8e5c-6b15e313b88e;1de90898-a17b-4157-9573-4a8049004b10	Not Available;Not Available;Not Available;Not Available;Not Available	8;8;8;8;8	Not Available;121;Not Available;121;121	122;52;122;52;52	Carboplatin;Carboplatin;Gemcitabine;Taxol;Taxol	Not Available;Not Available;Not Available;Not Available;Not Available	12;12;12;12;12	Not Available;Not Available;Not Available;Not Available;Not Available	Not Available;Not Available;Not Available;Not Available;Not Available	Not Available;Not Available;Not Available;Not Available;Not Available	PROGRESSION;ADJUVANT;PROGRESSION;ADJUVANT;ADJUVANT	Not Applicable;Not Applicable;Not Applicable;Not Applicable;Not Applicable	Not Available;Not Available;Not Available;Not Available;Not Available	Not Available;IP;IV;Not Available;IV;IP	NO;NO;NO;NO;NO	Chemotherapy;Chemotherapy;Chemotherapy;Chemotherapy;Chemotherapy	Not Available;Not Available;Not Available;Not Available;Not Available	Not Available;Not Available;Not Available;Not Available;Not Available	Not Available;Not Available;Not Available;Not Available;Not Available	Not Available;Not Available;Not Available;Not Available;Not Available	2009;2009;2009;2009;2009	Not Available	NOT HISPANIC OR LATINO	TCGA-61-2003-F28327	b31360a4-1e89-4989-a36b-11f5e8817b5d
TCGA-61-1722	FEMALE	19	Serous Cystadenocarcinoma	Ovary	Alive	Stage IB	G3	0	19			WITH TUMOR		89	Bilateral	TCGA-61-1722	47feba88-1ec9-4904-b0e2-3718f294badb	2	-32853	Not Applicable	0	19	TCGA-61-1722-D28130;TCGA-61-1722-D28132;TCGA-61-1722-D28131;TCGA-61-1722-D28133	08dcb240-abe5-4cd2-8b81-b865b8e57bf9;1ebe6dcf-919d-439f-ad65-eca304b64bc0;905dc122-807e-446f-80c3-408de2511c9f;594842d6-0c7e-4151-b277-bf6fbd04c4ab	Not Available;Not Available;Not Available;Not Available	4;4;4;12	19;19;19;19	19;19;19;19	Cytoxan;Vincristine;Mitoxantrone;Decodron	Not Available;Not Available;Not Available;Not Available	12;12;12;3	03;03;03;Not Available	Not Available;Not Available;Not Available;Not Available	mg;mg;mg;mg	ADJUVANT;ADJUVANT;ADJUVANT;ADJUVANT	Not Applicable;Not Applicable;Not Applicable;Not Applicable	Not Available;Not Available;Not Available;Not Available	IV;IV;IV;IV	NO;NO;NO;NO	Chemotherapy;Chemotherapy;Chemotherapy;Hormone Therapy	Not Available;Not Available;Not Available;Not Available	3000;6;29;30	mg;mg;mg;mg	Not Available;Not Available;Not Available;Not Available	2009;2009;2009;2010	Not Available	Not Available	TCGA-61-1722-F28129	2633c1c8-3dd9-4dfa-93cd-be433aa18856
TCGA-24-0975	FEMALE	663	Serous Cystadenocarcinoma	Ovary	Dead	Stage IIIC	G3	0	663			WITH TUMOR		58	Bilateral	TCGA-24-0975	6a57948c-0dc5-4ea2-8043-380f26763752	9	-21417	663	0	663	TCGA-24-0975-D25865;TCGA-24-0975-D25866;TCGA-24-0975-D25863;TCGA-24-0975-D25867;TCGA-24-0975-D25862;TCGA-24-0975-D25864	fbde8509-b99c-4069-86ea-638a3eff0d8d;afafd8b8-0b8c-4e45-944e-df82466920bf;f67062fb-a896-4c7b-adab-2bfedbaf34cf;e255c05a-03e0-47a8-a3bc-064fe0d4449b;b6206599-e812-43db-8625-fdd6a2142a9c;441ae864-4ce1-43eb-8f2c-3783269ca89b	Not Available;Not Available;Not Available;Not Available;Not Available;Not Available	9;9;9;9;9;9	Not Available;611;Not Available;611;Not Available;Not Available	22;Not Available;22;Not Available;22;22	Doxil;Topotecan;Paclitaxel;Navelbine;Carboplatin;Gemcitabine	Not Available;Not Available;Not Available;Not Available;Not Available;Not Available	3;3;3;3;3;3	2;3;8;3;8;2	Not Available;Not Available;Not Available;Not Available;Not Available;Not Available	Not Available;Not Available;Not Available;Not Available;Not Available;Not Available	PROGRESSION;PROGRESSION;ADJUVANT;PROGRESSION;ADJUVANT;PROGRESSION	Not Applicable;Not Applicable;Not Applicable;Not Applicable;Not Applicable;Not Applicable	Not Available;Not Available;Not Available;Not Available;Not Available;Not Available	IV;IV;IV;IV;IV;IV	NO;NO;NO;NO;NO;NO	Chemotherapy;Chemotherapy;Chemotherapy;Chemotherapy;Chemotherapy;Chemotherapy	Not Available;Not Available;Not Available;Not Available;Not Available;Not Available	Not Available;Not Available;Not Available;Not Available;Not Available;Not Available	Not Available;Not Available;Not Available;Not Available;Not Available;Not Available	Not Available;Not Available;Not Available;Not Available;Not Available;Not Available	2009;2009;2009;2009;2009;2009	Not Available	Not Available	TCGA-24-0975-F25861	fc2f81ab-fa8a-47f3-a537-77a64d2c2bff
TCGA-25-2393	FEMALE	1157	Serous Cystadenocarcinoma	Ovary	Dead	Stage IIIC	G3	1	305		Recurrence	WITH TUMOR		81	Left	TCGA-25-2393	b4b49027-7815-4813-9769-a3fe3a26a37a	5	-29585	1157	0	1157	TCGA-25-2393-D26804;TCGA-25-2393-D26805;TCGA-25-2393-D26806	f9f70865-c436-451d-b7cb-66c175893433;74515577-69c9-4221-9daf-8dd8bca545c2;9208f692-32d6-4340-b523-c6d8ae520f26	Not Available;Not Available;Not Available	5;5;5	123;123;517	31;31;305	Taxol;Carboplatin;Doxil	Not Available;Not Available;Not Available	1;1;1	06;06;08	Not Available;Not Available;Not Available	Not Available;Not Available;Not Available	ADJUVANT;ADJUVANT;RECURRENCE	Not Applicable;Not Applicable;Not Applicable	Not Available;Not Available;Not Available	IV;IV;IV	NO;NO;NO	Chemotherapy;Chemotherapy;Chemotherapy	Not Available;Not Available;Not Available	Not Available;Not Available;Not Available	Not Available;Not Available;Not Available	Not Available;Not Available;Not Available	2010;2010;2010	Not Available	NOT HISPANIC OR LATINO	TCGA-25-2393-F26803	ca8b79a1-aba9-4f39-a940-ad6da40efd5b
TCGA-61-2102	FEMALE	197	Serous Cystadenocarcinoma	Ovary	Dead	Stage IIIC	G3	0	197			WITH TUMOR		74	Right	TCGA-61-2102	7a08efd0-f984-430e-a8eb-1881047214b6	7	-27256	197	0	197	TCGA-61-2102-D28439;TCGA-61-2102-D28440	43d7605a-1774-4181-a4da-677d897ac471;9c357105-fe4d-4ec2-93e3-529f563fd5d8	Not Available;Not Available	7;7	Not Available;Not Available	14;14	Taxol;Carboplatin	Not Available;Not Available	12;12	Not Available;Not Available	Not Available;Not Available	Not Available;Not Available	ADJUVANT;ADJUVANT	Not Applicable;Not Applicable	Not Available;Not Available	IV;IV	NO;NO	Chemotherapy;Chemotherapy	Not Available;Not Available	Not Available;Not Available	Not Available;Not Available	Not Available;Not Available	2009;2009	Not Available	Not Available	TCGA-61-2102-F28438	0b2aa437-7686-4d29-ac07-bc166237edbf
TCGA-36-2548	FEMALE	431	Serous Cystadenocarcinoma	Ovary	Alive	Stage IIIC	G3	1	395		Recurrence	WITH TUMOR		57	Right	TCGA-36-2548	3250e604-d12a-4922-aaca-6f0cae095842	18	-20897	Not Applicable	0	431	TCGA-36-2548-D27964;TCGA-36-2548-D27963	c61c0ee3-7792-4556-a74e-0f4ce2ceb27b;7905da51-efd8-42a9-9ef7-e165f09bb674	Not Available;Not Available	18;18	267;267	58;58	Paclitaxel;Carboplatin	Not Available;Not Available	8;8	09;9	Not Available;Not Available	Not Available;Not Available	ADJUVANT;ADJUVANT	Not Applicable;Not Applicable	Not Available;Not Available	IV;IV	NO;NO	Chemotherapy;Chemotherapy	Not Available;Not Available	Not Available;Not Available	Not Available;Not Available	Not Available;Not Available	2010;2010	Not Available	Not Available	TCGA-36-2548-F27962	e62733f2-7722-4da0-9627-f34bce5e5c29
TCGA-42-2587	FEMALE	722	Serous Cystadenocarcinoma	Ovary	Alive	Stage IIIC	G3	0	722			TUMOR FREE		75	Bilateral	TCGA-42-2587	eef62876-7d17-496a-8971-2c7008d77014	3	-27510	Not Applicable	0	276	TCGA-42-2587-D28036;TCGA-42-2587-D28037;TCGA-42-2587-D28035;TCGA-42-2587-D28034;TCGA-42-2587-D28799;TCGA-42-2587-D28798;TCGA-42-2587-D28796	ffec8b1d-1d6c-4050-b6c3-f453bbffc47e;32127c37-e882-42f0-ab66-04c4714e1a54;b35f1439-dc93-4cce-84ce-54954bd7c017;1e1bb656-c424-468b-bd66-cb465f9f5eae;6b469b25-b567-4107-b82e-efe85e137b95;f8ec148f-6eed-4601-8312-6fe0888b92b3;61a1c2b5-2d22-4594-b3a4-46f029c4a77c	Not Available;Not Available;Not Available;Not Available;Not Available;Not Available;Not Available	3;3;3;3;22;22;22	Not Available;Not Available;94;94;605;276;290	150;150;17;17;326;276;283	Taxol;Carboplatin;Carboplatin;Taxol;Clinical Trial;Carboplatin;Taxol	Not Available;Not Available;Not Available;Not Available;Not Available;Not Available;Not Available	6;6;6;6;8;8;8	5;5;3;3;10;5;01	119;515;395;160;267;Not Available;117	mg;mg;mg;mg;mg;Not Available;mg	ADJUVANT;ADJUVANT;ADJUVANT;ADJUVANT;OTHER, SPECIFY IN NOTES;ADJUVANT;ADJUVANT	Not Applicable;Not Applicable;Not Applicable;Not Applicable;Maintenance;Not Applicable;Not Applicable	Not Available;Not Available;Not Available;Not Available;03;02;02	IV;IP;IV;IV;IV;IP;IV	YES;YES;NO;NO;NO;NO;NO	Chemotherapy;Chemotherapy;Chemotherapy;Chemotherapy;Chemotherapy;Chemotherapy;Chemotherapy	Not Available;Not Available;Not Available;Not Available;Not Available;Not Available;Not Available	1507;2575;1183;1018;2694;Not Available;234	mg;mg;mg;mg;mg;Not Available;mg	Not Available;Not Available;Not Available;Not Available;Not Available;Not Available;Not Available	2010;2010;2010;2010;2011;2011;2011	Not Available	NOT HISPANIC OR LATINO	TCGA-42-2587-F28033;TCGA-42-2587-F28795	1d73b669-822d-4b7a-9614-01cc92a2e983;897a2b59-77f9-472a-b8a4-d2c9db024b60
TCGA-25-1316	FEMALE	1279	Serous Cystadenocarcinoma	Ovary	Dead	Stage IIIC	G3	1	276		Progression of Disease	WITH TUMOR		55	Right	TCGA-25-1316	58427bce-6b81-4083-aeda-25f59e292bbc	27	-20331	1279	0	1126	TCGA-25-1316-D26647;TCGA-25-1316-D26649;TCGA-25-1316-D26648	937633f3-8ac6-4073-b96b-b491f465f7f6;8c815216-6c85-454c-b0ae-2f590d0c8aef;367c6a85-9774-4f94-a158-d267423a02ae	Not Available;Not Available;Not Available	27;27;27	214;214;406	61;61;276	Carbo;Taxol;Topotecan	Not Available;Not Available;Not Available	3;3;3	Not Available;Not Available;6	Not Available;Not Available;Not Available	Not Available;Not Available;Not Available	ADJUVANT;ADJUVANT;PROGRESSION	Not Applicable;Not Applicable;Not Applicable	Not Available;Not Available;Not Available	IV;IV;IV	NO;NO;NO	Chemotherapy;Chemotherapy;Chemotherapy	Not Available;Not Available;Not Available	Not Available;Not Available;Not Available	Not Available;Not Available;Not Available	Not Available;Not Available;Not Available	2009;2009;2009	Not Available	NOT HISPANIC OR LATINO	TCGA-25-1316-F26646	66d2e9b2-0219-4b9a-aa62-d52e65461829
TCGA-24-1558	FEMALE	594	Serous Cystadenocarcinoma	Ovary	Dead	Stage IIIC	G3	1	273		Recurrence	WITH TUMOR		73	Bilateral	TCGA-24-1558	ba68f2cf-9271-41fd-9655-1fac7681f588	2	-27004	594	0	594	TCGA-24-1558-D26214;TCGA-24-1558-D26217;TCGA-24-1558-D26218;TCGA-24-1558-D26216;TCGA-24-1558-D26213;TCGA-24-1558-D26215;TCGA-24-1558-D26219	e59ea4e0-2e2c-4f4a-942b-7efb1c0870fe;4c049036-fc07-4cb7-aefb-4b246a630259;63155ebc-160a-4045-a54a-e81db14d275a;265b7191-2211-4f94-b21e-ae81322cb380;e3d7f2e6-d2ae-4801-b607-03c8f2c13303;ec054464-9e15-41b0-94b1-a7143163f896;7e540806-6473-46d6-a1ed-008e4c59cd9e	Not Available;Not Available;Not Available;Not Available;Not Available;Not Available;Not Available	28;28;28;28;28;28;28	247;382;588;382;247;247;487	37;316;515;316;37;37;403	Carboplatin;Taxotere;Gemcitabine;Gemcitabine;Topotecan;Taxol;Doxil	Not Available;Not Available;Not Available;Not Available;Not Available;Not Available;Not Available	7;7;7;7;7;7;7	10;04;04;04;10;10;04	Not Available;Not Available;Not Available;Not Available;Not Available;Not Available;Not Available	mg;mg;mg;mg;mg;mg;mg	ADJUVANT;OTHER, SPECIFY IN NOTES;PROGRESSION;OTHER, SPECIFY IN NOTES;ADJUVANT;ADJUVANT;PROGRESSION	Not Applicable;Persistent disease treament;Not Applicable;Persistent disease treatment;Not Applicable;Not Applicable;Not Applicable	Not Available;Not Available;Not Available;Not Available;Not Available;Not Available;Not Available	IV;IV;IV;IV;IV;IV;IV	NO;NO;NO;NO;NO;NO;NO	Chemotherapy;Chemotherapy;Chemotherapy;Chemotherapy;Chemotherapy;Chemotherapy;Chemotherapy	Not Available;Not Available;Not Available;Not Available;Not Available;Not Available;Not Available	43.75;524;11810;3600;14.4;1800;277	mg;mg;mg;mg;mg;mg;mg	Not Available;Not Available;Not Available;Not Available;Not Available;Not Available;Not Available	2009;2009;2009;2009;2009;2009;2009	Not Available	Not Available	TCGA-24-1558-F26212	e5c8a6ca-1b37-4965-bf50-3c988437af33
TCGA-61-2610	FEMALE	1579	Serous Cystadenocarcinoma	Ovary	Dead	Stage IIIC	G3	1	524		Recurrence	WITH TUMOR		61	Left	TCGA-61-2610	1098441d-fb10-4590-a302-0a7cc2332798	7	-22481	1579	0	1579	TCGA-61-2610-D28485;TCGA-61-2610-D28486;TCGA-61-2610-D28487;TCGA-61-2610-D28488	d0b1651f-f3cd-4ccb-b9f5-cd3b5e34a0b5;741fb562-5cf2-415d-a54f-11bcb861ea9a;4974f4a7-8f86-480b-a922-48a07a10417c;efec5670-4d2b-42da-9e6f-aff946b9e90c	Not Available;Not Available;Not Available;Not Available	7;7;7;7	530;357;357;1130	439;29;29;591	Toptecan;Carboplatin;Taxol;Doxil	Not Available;Not Available;Not Available;Not Available	9;9;9;9	4;12;12;12	Not Available;Not Available;Not Available;Not Available	Not Available;Not Available;Not Available;Not Available	RECURRENCE;ADJUVANT;ADJUVANT;RECURRENCE	Not Applicable;Not Applicable;Not Applicable;Not Applicable	Not Available;Not Available;Not Available;Not Available	IV;IV;IV;IV	NO;NO;NO;NO	Chemotherapy;Chemotherapy;Chemotherapy;Chemotherapy	Not Available;Not Available;Not Available;Not Available	Not Available;Not Available;Not Available;Not Available	Not Available;Not Available;Not Available;Not Available	Not Available;Not Available;Not Available;Not Available	2010;2010;2010;2010	Not Available	Not Available	TCGA-61-2610-F28484	f2bc30dc-be52-4d63-8e28-76c312eb84c6
TCGA-13-0888	FEMALE	2811	Serous Cystadenocarcinoma	Ovary	Dead	Stage IIIC	G3	0	2811			TUMOR FREE		78	Right	TCGA-13-0888	6cf9f872-2e59-45cf-bb5e-ebd7fa1b3caf	25	-28498	Not Applicable	0	2141	TCGA-13-0888-D24674;TCGA-13-0888-D24676;TCGA-13-0888-D24675	6ff16be4-ef53-4e2d-b800-e9fe11910306;e70b84ff-49ff-42fb-ae5c-18c3c1a22aa4;31c8aef7-cb07-4117-983a-0544b208f1d7	Not Available;Not Available;Not Available	16;16;16	232;Not Available;232	54;253;54	Carboplatin;Femara;Paclitaxel	Not Available;Not Available;Not Available	4;4;4	8;Not Available;8	Not Available;Not Available;Not Available	Not Available;mg;mg/m2	ADJUVANT;ADJUVANT;ADJUVANT	Not Applicable;Not Applicable;Not Applicable	Not Available;Not Available;Not Available	IV;Not Available;IV	NO;YES;NO	Chemotherapy;Hormone Therapy;Chemotherapy	Not Available;Not Available;Not Available	Not Available;Not Available;Not Available	Not Available;mg;mg/m2	Not Available;Not Available;Not Available	2009;2009;2009	Not Available	NOT HISPANIC OR LATINO	TCGA-13-0888-F24673;TCGA-13-0888-F72618	5da77845-7980-438e-b5bb-94e293431a72;44FEA357-3287-44B8-BBAD-734044D397EF
TCGA-29-1703	FEMALE	1815	Serous Cystadenocarcinoma	Ovary	Dead	Stage IIIC	G2	1	324		Recurrence	WITH TUMOR		56	Bilateral	TCGA-29-1703	b3511675-fd68-4745-8020-e290ca0fd115	2	-20622	1815	0	1815	TCGA-29-1703-D27256;TCGA-29-1703-D27257;TCGA-29-1703-D27261;TCGA-29-1703-D27264;TCGA-29-1703-D27266;TCGA-29-1703-D27259;TCGA-29-1703-D27263;TCGA-29-1703-D27262;TCGA-29-1703-D27260;TCGA-29-1703-D27265;TCGA-29-1703-D27267;TCGA-29-1703-D27258	14913535-e3ee-4b29-8485-5ef50b7c1123;299385fc-3e5b-4fd2-a656-6fdb78daa069;4c4f2cec-35a9-462b-bc94-0fb8506d93aa;53f8a8a1-9b2e-4469-9d98-66f1234ca04d;5a22c5fc-1192-4db9-86cb-84768e401698;7f6adfa1-73ce-46ec-b9ae-fdec4acedd2f;4d5bfe23-dd0f-43f5-8880-c91953ddc025;98b7f1cd-615d-4d0f-8e2d-ac2ababfc43d;48f028c2-6e0e-4b9a-a457-ab27cc986d53;7f78908a-4b31-41ff-9268-b209ed2e6c93;e56227e6-4d59-43d0-b3a9-8d0ba…	Not Available;Not Available;Not Available;Not Available;Not Available;Not Available;Not Available;Not Available;Not Available;Not Available;Not Available;Not Available	18;18;26;26;26;26;26;26;26;26;26;26	163;163;1457;1753;946;651;1720;1667;946;470;1314;651	16;16;1317;1746;743;478;1720;1577;743;337;1030;478	Paclitaxel;Carboplatin;Doxorubicin HCL Liposomal -Doxil;Paclitaxel;Bevacizumab;Docetaxel;Carboplatin;Gemcitabine;Cytoxan;Tamoxifen;Amgen 706;Carboplatin	Not Available;Not Available;Not Available;Not Available;Not Available;Not Available;Not Available;Not Available;Not Available;Not Available;Not Available;Not Available	12;12;4;4;4;4;4;4;4;4;4;4	06;06;06;02;Not Available;09;01;04;Not Available;Not Available;Not Available;09	Not Available;Not Available;Not Available;Not Available;Not Available;Not Available;Not Available;Not Available;Not Available;Not Available;Not Available;Not Available	mg;mg;mg;mg/m2;mg;mg;mg;mg;mg;Not Available;Not Available;mg	ADJUVANT;ADJUVANT;PROGRESSION;PROGRESSION;PROGRESSION;PROGRESSION;PROGRESSION;PROGRESSION;PROGRESSION;RECURRENCE;PROGRESSION;PROGRESSION	Not Applicable;Not Applicable;Not Applicable;Not Applicable;Not Applicable;Not Applicable;Not Applicable;Not Applicable;Not Applicable;Not Applicable;Not Applicable;Not Applicable	Not Available;Not Available;Not Available;Not Available;Not Available;Not Available;Not Available;Not Available;Not Available;Not Available;Not Available;Not Available	IP;IP;IV;IV;Not Available;IV;IV;IV;PO;Not Available;Not Available;IV	NO;NO;NO;NO;NO;NO;NO;NO;NO;NO;NO;NO	Chemotherapy;Chemotherapy;Chemotherapy;Chemotherapy;Targeted Molecular therapy;Chemotherapy;Chemotherapy;Chemotherapy;Chemotherapy;Hormone Therapy;Targeted Molecular therapy;Chemotherapy	Not Available;Not Available;Not Available;Not Available;Not Available;Not Available;Not Available;Not Available;Not Available;Not Available;Not Available;Not Available	1595;4081;70;80;800;55;390;1370;50;Not Available;Not Available;773	mg;mg;mg;mg/m2;mg;mg;mg;mg;mg;Not Available;Not Available;mg	Not Available;Not Available;Not Available;Not Available;Not Available;Not Available;Not Available;Not Available;Not Available;Not Available;Not Available;Not Available	2009;2009;2010;2010;2010;2010;2010;2010;2010;2010;2010;2010	0	Not Available	TCGA-29-1703-F27255	aef081e4-4629-4f49-a25f-0787fe8e2ce5
TCGA-13-0899	FEMALE	2012	Serous Cystadenocarcinoma	Ovary	Dead	Stage IIIC	G3	1	547		Recurrence	WITH TUMOR		60	Bilateral	TCGA-13-0899	5c6f3cd4-19c5-418d-b1be-d3fbf63e99db	25	-22031	Not Applicable	0	1708	TCGA-13-0899-D24706;TCGA-13-0899-D24705	f1500cb6-1acc-4eba-a03d-bdf3b9327360;24164473-0e73-4062-bf9b-dc624f95510a	Not Available;Not Available	15;15	126;126	16;16	Paclitaxel;Carboplatin	Not Available;Not Available	4;4	6;6	Not Available;Not Available	mg/m2;Not Available	ADJUVANT;ADJUVANT	Not Applicable;Not Applicable	Not Available;Not Available	IV;IV	NO;NO	Chemotherapy;Chemotherapy	Not Available;Not Available	1050;Not Available	mg/m2;Not Available	Not Available;Not Available	2009;2009	Not Available	NOT HISPANIC OR LATINO	TCGA-13-0899-F24704;TCGA-13-0899-F72623	fd6b2332-5712-4df7-bf7b-366934559985;9493D064-5F49-4972-9EA8-DE6E0586C7B3
TCGA-29-2432	FEMALE	653	Serous Cystadenocarcinoma	Ovary	Dead	Stage IIIC	G3	1	174		Recurrence	WITH TUMOR		61	Bilateral	TCGA-29-2432	0e6c9433-289c-4744-a0c1-47ec67774047	4	-22605	653	0	360	TCGA-29-2432-D27494;TCGA-29-2432-D27493;TCGA-29-2432-D27495	ec863682-01e3-4e42-b640-495a71b085bc;d5720bb9-fbde-4f8d-a0b5-7bb82df87ce2;cebea2c3-9245-4c77-b299-33df263ad6d7	Not Available;Not Available;Not Available	4;4;4	157;157;157	14;14;38	Paclitaxel;Carboplatin;Bevacizumab	Not Available;Not Available;Not Available	6;6;6	06;06;Not Available	303;540;1010	mg;mg;mg	ADJUVANT;ADJUVANT;ADJUVANT	Not Applicable;Not Applicable;Not Applicable	Not Available;Not Available;Not Available	IV;IV;PO	NO;NO;NO	Chemotherapy;Chemotherapy;Targeted Molecular therapy	Not Available;Not Available;Not Available	1809;3150;Not Available	mg;mg;mg	Not Available;Not Available;Not Available	2010;2010;2010	Not Available	Not Available	TCGA-29-2432-F27492	5b747676-eca5-410c-8d08-36ff1266ba07
TCGA-24-1614	FEMALE	1470	Serous Cystadenocarcinoma	Ovary	Dead	Stage IIIC	G3	1	644		Recurrence	WITH TUMOR		57	Right	TCGA-24-1614	d3164236-c14a-4230-b527-ecd1a3992f02	13	-20993	1470	0	1470	TCGA-24-1614-D26311;TCGA-24-1614-D26308;TCGA-24-1614-D26310;TCGA-24-1614-D26312;TCGA-24-1614-D26313;TCGA-24-1614-D26307;TCGA-24-1614-D26309	3d68a968-d13b-4ac5-bf8d-30f04aec9604;182d6037-89ec-4b51-9376-02ae5255ef66;d4a208fe-06b7-4a31-929e-0f583e7fb3d7;fa6b707e-13d5-41cc-baf3-af81fce80495;9e5ef115-0bd9-4e75-b594-70ec7010fc98;cfb807b3-6f3b-4d81-ba3b-b873bc99e8de;c1b63ae7-ab4d-4099-9c0e-258e497592cb	Not Available;Not Available;Not Available;Not Available;Not Available;Not Available;Not Available	13;13;13;13;13;13;13	1133;188;888;1133;1443;188;888	1010;22;644;1010;1284;22;644	Carboplatin;Taxol;Navelbine;Taxol;Doxil;Carboplatin;Topotecan	Not Available;Not Available;Not Available;Not Available;Not Available;Not Available;Not Available	5;5;5;5;5;5;5	06;08;11;06;04;08;11	Not Available;Not Available;Not Available;Not Available;Not Available;Not Available;Not Available	Not Available;Not Available;Not Available;Not Available;Not Available;Not Available;Not Available	RECURRENCE;ADJUVANT;RECURRENCE;RECURRENCE;RECURRENCE;ADJUVANT;RECURRENCE	Not Applicable;Not Applicable;Not Applicable;Not Applicable;Not Applicable;Not Applicable;Not Applicable	Not Available;Not Available;Not Available;Not Available;Not Available;Not Available;Not Available	IV;IV;Not Available;IV;IV;IV;Not Available	NO;NO;NO;NO;NO;NO;NO	Chemotherapy;Chemotherapy;Chemotherapy;Chemotherapy;Chemotherapy;Chemotherapy;Chemotherapy	Not Available;Not Available;Not Available;Not Available;Not Available;Not Available;Not Available	Not Available;Not Available;Not Available;Not Available;Not Available;Not Available;Not Available	Not Available;Not Available;Not Available;Not Available;Not Available;Not Available;Not Available	Not Available;Not Available;Not Available;Not Available;Not Available;Not Available;Not Available	2009;2009;2009;2009;2009;2009;2009	Not Available	Not Available	TCGA-24-1614-F26306	2e7f89f0-bf3f-4bb8-b6ac-2bb6fb323440
TCGA-13-0885	FEMALE	3388	Serous Cystadenocarcinoma	Ovary	Alive	Stage IIIC	G3	0	3388			Not Available		70	Left	TCGA-13-0885	2a924999-1fbf-470a-97bd-fd2276a9a366	25	-25763	Not Applicable	0	2780	TCGA-13-0885-D24661;TCGA-13-0885-D24660;TCGA-13-0885-D24659	30bfb060-bc43-4205-a472-4139381c0c69;2786c1cb-0952-4c59-b515-77c3a5c35742;1b109abf-497f-455d-b2cd-afb4f953f287	Not Available;Not Available;Not Available	15;15;15	208;110;110	Not Available;6;6	Cisplatin;Paclitaxel;Carboplatin	Not Available;Not Available;Not Available	4;4;4	3;6;6	Not Available;Not Available;Not Available	Not Available;mg/m2;AUC	ADJUVANT;ADJUVANT;ADJUVANT	Not Applicable;Not Applicable;Not Applicable	Not Available;Not Available;Not Available	IP;IV;IV	NO;NO;NO	Chemotherapy;Chemotherapy;Chemotherapy	Not Available;Not Available;Not Available	Not Available;175;5	Not Available;mg/m2;AUC	Not Available;Not Available;Not Available	2009;2009;2009	Not Available	NOT HISPANIC OR LATINO	TCGA-13-0885-F24658;TCGA-13-0885-F72616	dc9ec5ec-5e34-40f1-baef-f0a594f2a4cb;08B199AD-606F-4267-AA79-6F4CB9CFB532
TCGA-13-0766	FEMALE	1725	Serous Cystadenocarcinoma	Ovary	Dead	Stage IIIC	G3	1	628		Recurrence	WITH TUMOR		42	Bilateral	TCGA-13-0766	8fe44099-b313-4bfd-a94a-27e72f2a818c	24	-15571	Not Applicable	0	651	TCGA-13-0766-D24568;TCGA-13-0766-D24569;TCGA-13-0766-D24570	3b508635-6136-468c-965e-6c9f011017c6;b3b92756-81fc-4d20-8fbe-2be751f193c3;e98199f4-62f6-444e-804c-fea51774aa05	Not Available;Not Available;Not Available	15;15;15	Not Available;182;182	Not Available;Not Available;Not Available	Carboplatin;Cisplatin;Paclitaxel	Not Available;Not Available;Not Available	4;4;4	2;4;4	Not Available;Not Available;Not Available	Not Available;mg/m2;mg/m2	ADJUVANT;ADJUVANT;ADJUVANT	Not Applicable;Not Applicable;Not Applicable	Not Available;Not Available;Not Available	IV;IP;IV	NO;NO;NO	Chemotherapy;Chemotherapy;Chemotherapy	Not Available;Not Available;Not Available	Not Available;Not Available;100	Not Available;mg/m2;mg/m2	Not Available;Not Available;Not Available	2009;2009;2009	Not Available	NOT HISPANIC OR LATINO	TCGA-13-0766-F24567;TCGA-13-0766-F72601	6f218d11-5224-464e-a2ee-d18e3eaf0dc5;9B0A75C2-C1C0-4480-AB8A-A414B7DEC03F
[truncated: 279 more rows]
[truncated: 104 more columns]

## Sheet: S2_Table
CnvRegion	CnvGene	ExpGene	Cor	Cor.pvalue	Z_value
RP11.624L12.1	RP11.624L12.1	RP11.624L12.1	0.0391177	0.465062	0.0391377
RP11.342K6.4	RP11.342K6.4	RP11.342K6.4	0.335815	1.06419e-10	0.349369
RP11.356J5.12	RP11.356J5.12	RP11.356J5.12	0.293469	2.11462e-08	0.302358
LYSMD2	LYSMD2	LYSMD2	0.408606	1.47652e-15	0.433937
CAPN5	CAPN5	CAPN5	0.621736	6.33024e-39	0.72783
RPL37P3	RPL37P3	RPL37P3	0.222009	2.7049e-05	0.225768
NUP88	NUP88	NUP88	0.684179	8.93025e-50	0.836929
GABARAPL3	GABARAPL3	GABARAPL3	0.284375	5.92347e-08	0.292436
[truncated: 12,330 more rows]

## Sheet: S3_Table
MetProbe	MetGene	ExpGene	Cor	Cor.pvalue	Z_value
[truncated: 15,277 more rows]

[truncated: 10 more sheets: S4_Tabl, S5_Tabl, S6_Tabl, S7_Tabl, S8_Tabl, S9_Tabl, S10_Tabl, S11_Tabl, S12_Tabl, S13_Tabl]
